# Supplementary material
Source: publisher figshare collection journal article supplement (https://acs.figshare.com/ndownloader/files/34503010)
Supplement: Supplementary file 1 [file 34503010]

Supporting information

**Methane Monooxygenase Mimic Asymmetric Oxidation:  
Self-Assembling  $\mu$ -Hydroxo, Carboxylate-Bridged  
Diiron(III) Catalyzed Enantioselective Dehydrogenation**

Honghao Guan,<sup>†</sup> Chen-Ho Tung,<sup>†</sup> Lei Liu<sup>\*,†</sup>

<sup>†</sup>School of Chemistry and Chemical Engineering, Shandong University, Jinan 250100, China

\*Correspondence to: [leiliu@sdu.edu.cn](mailto:leiliu@sdu.edu.cn)

## Table of contents

|                                                  |            |
|--------------------------------------------------|------------|
| <b>Table of contents.....</b>                    | <b>S2</b>  |
| <b>General information .....</b>                 | <b>S3</b>  |
| <b>General procedures.....</b>                   | <b>S4</b>  |
| <b>Optimization of reaction conditions .....</b> | <b>S9</b>  |
| <b>Analytical data for products .....</b>        | <b>S10</b> |
| <b>Mechanism studies .....</b>                   | <b>S32</b> |
| <b>X-ray crystallographic data .....</b>         | <b>S45</b> |
| <b>References .....</b>                          | <b>S51</b> |
| <b>NMR spectra.....</b>                          | <b>S53</b> |
| <b>HPLC spectra .....</b>                        | <b>S92</b> |

## General Information

Proton ( $^1\text{H}$  NMR) and carbon ( $^{13}\text{C}$  NMR) nuclear magnetic resonance spectra were recorded at 500 MHz or 400 MHz and 126 MHz or 101 MHz, respectively. The chemical shifts are given in parts per million (ppm) on the delta ( $\delta$ ) scale. The solvent peak was used as a reference value, for  $^1\text{H}$  NMR:  $\text{CDCl}_3 = 7.26$  ppm; for  $^{13}\text{C}$  NMR:  $\text{CDCl}_3 = 77.23$  ppm. Analytical TLC was performed on precoated silica gel GF254 plates. Column chromatography was carried out on silica gel (200–300 mesh). Optical rotations were measured using a 2.5 mL cell with a 10 cm path length on Hanon P850 Automatic Polarimeter and concentrations ( $c$ ) were reported in  $\text{g} \times (100 \text{ mL})^{-1}$ . HRMS were measured on the Q-TOF 6510 instruments. UV-vis spectra were carried on Agilent Cary 8454 UV-Visible spectrophotometer. Resonance Raman spectroscopy was measured on LabRAM HR Evolution in-situ UV laser confocal Raman Spectrometer. Enantiomeric excesses were determined by HPLC using a Daicel Chiralpak and Chiralcel column with hexane/*i*-PrOH as the eluent on Dionex instrument. All the solvents were freshly distilled prior to use according to the standard procedures.<sup>[1]</sup>

## General Procedures

### General procedure A: Dehydrogenative kinetic resolution of racemic substrates catalyzed by pre-synthesised diiron complexes

To a solution of racemic substrate (0.1 mmol, 1.0 equiv) in CH<sub>2</sub>Cl<sub>2</sub> (1.0 mL), dimeric iron complex **C1-C8** (0.005 mmol, 5 mmol %) was added at -40 °C. Then 30% aqueous hydrogen peroxide (0.1 mmol, 10 µL, 1.0 equiv) was added and the reaction was then stirred at same temperature for 24 h. Then the mixture was diluted with CH<sub>2</sub>Cl<sub>2</sub> (20 mL), washed with water (10 mL), dried over MgSO<sub>4</sub>, filtered and concentrated. The residue was purified by silica gel chromatography using ethyl acetate/petroleum ether as eluent to give the desired product.

### General procedure B: Dehydrogenative kinetic resolution of racemic substrates catalyzed by self-assembled diiron complex

To a solution of racemic substrate (0.1 mmol, 1.0 equiv) in CH<sub>2</sub>Cl<sub>2</sub> (1.0 mL), **C<sub>mono</sub>8** (0.005 mmol, 3.7 mg, 5 mmol %) and sodium 6-methoxy-2-naphthoate (0.01 mmol, 2.2 mg, 10 mmol %) was added at -40 °C. Then 30% aqueous hydrogen peroxide (0.1 mmol, 10 µL, 1.0 equiv) was added as 4 portions in 2-hours intervals. The reaction was then stirred at same temperature for 1-32 h. Then the mixture was diluted with CH<sub>2</sub>Cl<sub>2</sub> (20 mL), washed with water (10 mL), dried over MgSO<sub>4</sub>, filtered and concentrated. The residue was purified by silica gel chromatography using ethyl acetate/petroleum ether as eluent to give the desired product.

### Synthesis of substrates

Substrates **1m**, **5b**, **5d**, **5e**, **5f**, **5g**, **8** and **11** were known compounds and prepared following the established procedures.<sup>[2-9]</sup>

### General procedure C: Synthesis of racemic Substrates **1a-1l**, **3a-3j**, **5a**, **5c**, and **10**:

### Scheme S1. Preparation of substrates.

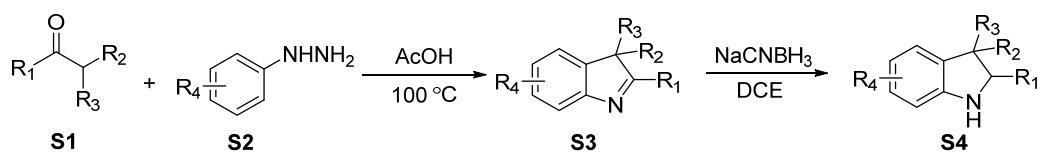

A mixture of arylhydrazine **S2** or its HCl salt (5.5 mmol) and **S1** (5 mmol) in AcOH (10 mL) was stirred at 100 °C for 1–6 h. The reaction was monitored by TLC. Upon completion, the reaction mixture was cooled with cold water and diluted with 1,2-dichloroethane (10 mL) followed by treatment with NaCNBH<sub>3</sub> (7.5 mmol, 1.5 equiv) in portions with cooling in cold water and was then stirred for 1 h at room temperature. The reaction was quenched with water, extracted with EtOAc and washed with sat. NaHCO<sub>3</sub>. The organic layer was dried over MgSO<sub>4</sub>, filtered, and concentrated. The residue was purified by chromatography with EtOAc/petroleum ether to provide the products.

### Synthesis of monomeric Fe(salan) and Fe(salen) complexes

Fe(salan) complex **C<sub>mono</sub>3** were prepared following established procedures.<sup>[10]</sup>

### Scheme S2. Preparation of monomeric Fe(salan) complexes.

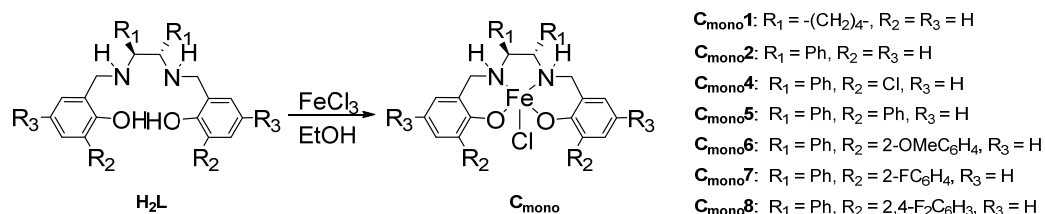

### General procedure D: Synthesis of monomeric Fe(salan) complex **C<sub>mono</sub>1**, **C<sub>mono</sub>2**, **C<sub>mono</sub>4**-**C<sub>mono</sub>8**:

FeCl<sub>3</sub> (0.42 mmol, 1.05 equiv) was added to a solution of H<sub>2</sub>L (0.4 mmol, 1.0 equiv) in ethanol (10 mL) giving a purplish solution which was refluxed for 4 h. Then the reaction mixture was evaporated in vacuo. The residue was chromatographed on silica gel (CH<sub>2</sub>Cl<sub>2</sub> / MeOH = 19 : 1) to give the corresponding complex respectively.

## Synthesis of carboxylate-bridged ( $\mu$ -hydroxo) diiron(III) complexes C1-C10:

### Scheme S3. Preparation of diiron(III) complexes.

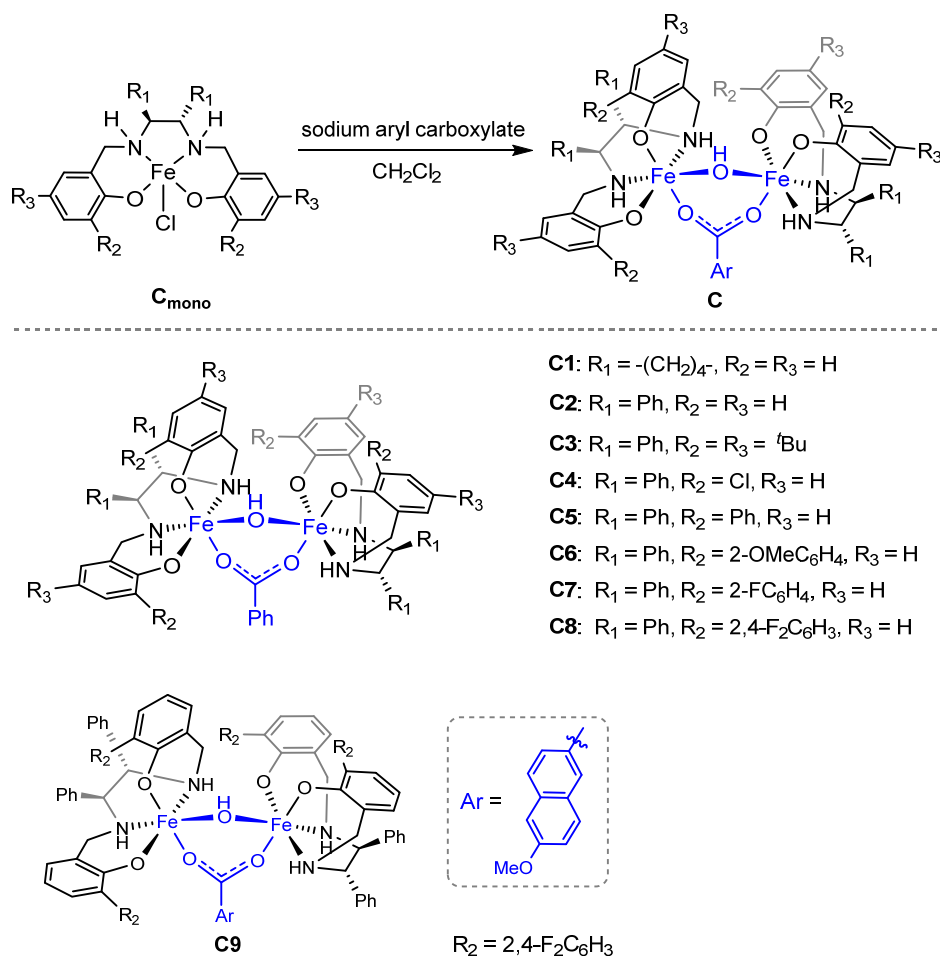

### General procedure E: Synthesis of diiron(III) complexes C1-C9:

Monomer complex **C<sub>mono</sub>1-C<sub>mono</sub>8** (0.05 mmol, 1.0 equiv) dissolved in  $\text{CH}_2\text{Cl}_2$ -EtOH-acetone- $\text{H}_2\text{O}$  (3 mL/ 3 mL/3 mL/ 1 drop) solution and additive sodium aryl carboxylate (20 equiv) was added. The mixture was maintained open-flask at room temperature for several days until the solid dimeric iron complexes precipitated. UV-vis absorption spectra and ESI-MS was conducted to characterize these complexes. UV-vis absorption spectra used  $\text{CH}_2\text{Cl}_2$  as solvent and the concentration is  $10^{-5}$  mol/L.

### Complex C1:

Reddish purple solid; ESI-MS  $m/z$   $[\text{M} - \text{OH}]^+$  calculated for  $\text{C}_{47}\text{H}_{53}\text{Fe}_2\text{N}_4\text{O}_6$ : 881.27, found 881.25;  $m/z$   $[\text{M} - \text{H}]^-$  calculated for  $\text{C}_{47}\text{H}_{53}\text{Fe}_2\text{N}_4\text{O}_7$ : 897.26, found 897.25.

UV-vis absorption features at 276, 311 and 498 nm and the corresponding monomer UV-vis absorption features at 275, 316 and 529 nm.

**Complex C2:**

Reddish purple solid; ESI-MS  $m/z$   $[M - OH]^+$  calculated for  $C_{63}H_{57}Fe_2N_4O_6$ : 1077.30, found 1077.30;  $m/z$   $[M - H]^+$  calculated for  $C_{63}H_{57}Fe_2N_4O_7$ : 1093.29, found 1093.32. UV-vis absorption features at 280, 310 and 491 nm and the corresponding monomer UV-vis absorption features at 316 and 504 nm.

**Complex C3:**

Purple solid; ESI-MS  $m/z$   $[M - OH]^+$  calculated for  $C_{95}H_{121}Fe_2N_4O_6$ : 1525.80, found 1525.76;  $m/z$   $[M - H]^+$  calculated for  $C_{95}H_{121}Fe_2N_4O_7$ : 1541.79, found 1541.80. UV-vis absorption features at 279, 329 and 543 nm and the corresponding monomer UV-vis absorption features at 281, 333 and 541 nm.

**Complex C4:**

Reddish purple solid; ESI-MS  $m/z$   $[M - OH]^+$  calculated for  $C_{63}H_{53}Cl_4Fe_2N_4O_6$ : 1213.14, found 1213.24;  $m/z$   $[M - H]^+$  calculated for  $C_{63}H_{53}Cl_4Fe_2N_4O_7$ : 1229.14, found 1229.17. UV-vis absorption features at 284 and 493 nm and the corresponding monomer UV-vis absorption features at 284, 317 and 525 nm.

**Complex C5:**

Purple solid; ESI-MS  $m/z$   $[M - OH]^+$  calculated for  $C_{87}H_{73}Fe_2N_4O_6$ : 1381.42, found 1381.37;  $m/z$   $[M - H]^+$  calculated for  $C_{87}H_{73}Fe_2N_4O_7$ : 1397.42, found 1397.41. UV-vis absorption features at 301 and 520 nm and the corresponding monomer UV-vis absorption features at 302 and 527 nm.

**Complex C6:**

Purple solid; ESI-MS  $m/z$   $[M - OH]^+$  calculated for  $C_{91}H_{81}Fe_2N_4O_{10}$ : 1501.46, found 1501.43;  $m/z$   $[M - H]^+$  calculated for  $C_{91}H_{81}Fe_2N_4O_{11}$ : 1517.46, found 1517.48. UV-vis absorption features at 301 and 518 nm and the corresponding monomer UV-vis absorption features at 300 and 541 nm.

**Complex C7:**

Purple solid; ESI-MS  $m/z$   $[M - OH]^+$  calculated for  $C_{87}H_{69}F_4Fe_2N_4O_6$ : 1453.38, found 1453.49;  $m/z$   $[M - H]^+$  calculated for  $C_{87}H_{69}F_4Fe_2N_4O_7$ : 1469.38, found 1469.38. UV-vis absorption features at 296 and 502 nm and the corresponding monomer UV-vis absorption features at 295 and 506 nm.

**Complex C8:**

Purple solid; ESI-MS  $m/z$   $[M - OH]^+$  calculated for  $C_{87}H_{65}F_8Fe_2N_4O_6$ : 1525.35, found 1525.40;  $m/z$   $[M - H]^+$  calculated for  $C_{87}H_{65}F_8Fe_2N_4O_7$ : 1541.34, found 1541.34. UV-vis absorption features at 295 and 498 nm and the corresponding monomer UV-vis absorption features at 294 and 512 nm.

**Complex C9:**

Purple solid; ESI-MS  $m/z$   $[M - OH]^+$  calculated for  $C_{92}H_{69}F_8Fe_2N_4O_7$ : 1605.37, found 1605.37;  $m/z$   $[M - H]^+$  calculated for  $C_{92}H_{69}F_8Fe_2N_4O_8$ : 1621.37, found 1621.33. UV-vis absorption features at 302 and 521 nm.



## Optimization of reaction conditions

**Table S1. Solvent, additive and reaction temperature optimization of dehydrogenative kinetic resolution reaction<sup>a</sup>**

| entry           | additive   | Solvent                         | conv. (%) <sup>b</sup> | ee (%) <sup>c</sup> | <i>s</i> <sup>d</sup> |
|-----------------|------------|---------------------------------|------------------------|---------------------|-----------------------|
| 1               | PhCOONa    | 1,2-Dichloroethane              | 50                     | 57                  | 6.3                   |
| 2               | PhCOONa    | Chloroform                      | 55                     | 22                  | 1.7                   |
| 3               | PhCOONa    | THF                             | 45                     | 0                   | n.d.                  |
| 4               | PhCOONa    | Methanol                        | 51                     | 9                   | 1.3                   |
| 5               | PhCOONa    | Ethyl acetate                   | 51                     | 23                  | 1.9                   |
| 6               | PhCOONa    | Toluene                         | 47                     | 17                  | 1.7                   |
| 7               | PhCOONa    | Acetone                         | 53                     | 15                  | 1.5                   |
| 8               | PhCOONa    | Acetonitrile                    | 47                     | 13                  | 1.5                   |
| 9               | PhCOONa    | CH <sub>2</sub> Cl <sub>2</sub> | 49                     | 71                  | 14                    |
| 10 <sup>e</sup> | PhCOONa    | CH <sub>2</sub> Cl <sub>2</sub> | 55                     | 41                  | 2.9                   |
| 11 <sup>f</sup> | PhCOONa    | CH <sub>2</sub> Cl <sub>2</sub> | 40                     | 45                  | 8.0                   |
| 12              | 1-Naphthol | CH <sub>2</sub> Cl <sub>2</sub> | 53                     | 9                   | 1.3                   |

<sup>a</sup>Reaction condition: to rac-1a (0.1 mmol), monoiron **C<sub>mono</sub>8** (5 mol %) and additive (10 mol %) in solvent (1.0 mL) at -40 °C was added 30% aqueous H<sub>2</sub>O<sub>2</sub> (0.1 mmol) as four portions in 2 h intervals for 6 h, and the mixture was stirred at -40 °C for 18-24 h, unless otherwise noted.

<sup>b</sup>Conversion was calculated from the isolated yield of recovered (*S*)-1a. <sup>c</sup>Determined by HPLC analysis on a chiral stationary phase. <sup>d</sup>Selectivity (*s*) values were calculated through the equation  $s = \ln[(1 - C)(1 - ee)] / \ln[(1 - C)(1 + ee)]$ , where C is the conversion.

<sup>e</sup>Reaction temperature was -20 °C. <sup>f</sup>Reaction temperature was -60 °C.

## Analytical data for products

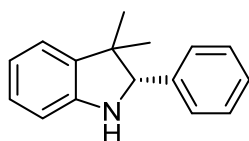

### (S)-3,3-Dimethyl-2-phenylindoline (**1a**)

It was prepared following the general procedure B and purified by silica gel flash chromatography using ethyl acetate/petroleum ether (1:9) as eluent to afford **1a** (11.2 mg, 50% yield). Yellow solid, m.p. 55-58 °C.  $^1\text{H}$  NMR (500 MHz,  $\text{CDCl}_3$ )  $\delta$  7.47 (dd,  $J = 5.3, 3.5$  Hz, 2H), 7.39–7.30 (m, 3H), 7.12–7.06 (m, 2H), 6.82 (td,  $J = 7.4, 0.9$  Hz, 1H), 6.75 (d,  $J = 7.7$  Hz, 1H), 4.62 (s, 1H), 1.45 (s, 3H), 0.76 (s, 3H);  $^{13}\text{C}$  NMR (126 MHz,  $\text{CDCl}_3$ )  $\delta$  149.1, 139.9, 138.4, 128.3, 127.7, 127.7, 127.6, 122.7, 119.5, 109.7, 74.7, 45.6, 26.7, 24.7. HPLC: the ee value was determined by HPLC analysis (Chiralcel IB, *i*-PrOH/Hexane = 20/80, 1.0 mL/min, 296 nm), retention time:  $t_{\text{major}} = 9.723$  min,  $t_{\text{minor}} = 5.240$  min, ee = 94.10%;  $[\alpha]_{\text{D}}^{20} = +173.35$  ( $c = 0.31$ , THF). HRMS (EI)  $m/z$   $[\text{M} + \text{H}]^+$  calculated for  $\text{C}_{16}\text{H}_{18}\text{N}$ : 224.1434, found 224.1428. The absolute configuration was assigned as *S* by comparing the optical rotation and HPLC analysis with reported data.<sup>[11]</sup>

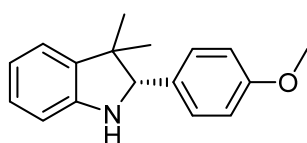

### (S)-2-(4-Methoxyphenyl)-3,3-dimethylindoline (**1b**)

It was prepared following the general procedure B and purified by silica gel flash chromatography using ethyl acetate/petroleum ether (1:9) as eluent to afford **1b** (12.5 mg, 49% yield) and **2b**. Yellow solid, m.p. 75-76 °C.  $^1\text{H}$  NMR (500 MHz,  $\text{CDCl}_3$ )  $\delta$  7.40–7.34 (m, 2H), 7.11–7.04 (m, 2H), 6.92–6.87 (m, 2H), 6.80 (td,  $J = 7.4, 0.7$  Hz, 1H), 6.73 (d,  $J = 7.7$  Hz, 1H), 4.56 (s, 1H), 3.83 (s, 3H), 1.41 (s, 3H), 0.75 (s, 3H).  $^{13}\text{C}$  NMR (126 MHz,  $\text{CDCl}_3$ )  $\delta$  159.1, 149.0, 138.3, 131.7, 128.5, 127.4, 122.5, 119.2, 113.5, 109.4, 74.1, 55.3, 45.3, 26.4, 24.5. HPLC: the ee value was determined by

HPLC analysis (Chiralcel IB, *i*-PrOH/Hexane = 20/80, 1.0 mL/min, 215 nm), retention time:  $t_{\text{major}} = 7.863$  min,  $t_{\text{minor}} = 5.160$  min, ee = 97.96%;  $[\alpha]_{\text{D}}^{20} = +126.4$  ( $c = 0.23$ , THF). HRMS (EI)  $m/z$   $[M + H]^+$  calculated for  $\text{C}_{17}\text{H}_{20}\text{NO}$ : 254.1539, found 254.1551.

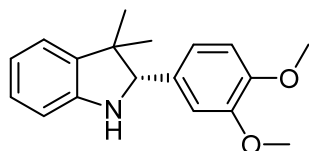

**(S)-2-(3,4-Dimethoxyphenyl)-3,3-dimethylindoline (1c)**

It was prepared following the general procedure B and purified by silica gel flash chromatography using ethyl acetate/petroleum ether (2:8) as eluent to afford **1c** (13.6 mg, 48% yield). White solid, m.p. 98-99 °C.  $^1\text{H}$  NMR (500 MHz,  $\text{CDCl}_3$ )  $\delta$  7.08 (m, 3H), 6.96 (dd,  $J = 8.2, 1.8$  Hz, 1H), 6.86 (d,  $J = 8.2$  Hz, 1H), 6.80 (td,  $J = 7.4, 0.8$  Hz, 1H), 6.73 (d,  $J = 7.7$  Hz, 1H), 4.55 (s, 1H), 3.90 (s, 3H), 3.89 (s, 3H), 1.42 (s, 3H), 0.75 (s, 3H).  $^{13}\text{C}$  NMR (126 MHz,  $\text{CDCl}_3$ )  $\delta$  148.9, 148.6, 138.4, 132.5, 127.6, 122.7, 119.7, 119.4, 110.9, 110.8, 109.5, 74.5, 56.1, 45.5, 26.5, 24.7. HPLC: the ee value was determined by HPLC analysis (Chiralcel IB, *i*-PrOH/Hexane = 20/80, 1.0 mL/min, 254 nm), retention time:  $t_{\text{major}} = 13.733$  min,  $t_{\text{minor}} = 7.470$  min, ee = 96.04%;  $[\alpha]_{\text{D}}^{20} = +174.2$  ( $c = 0.23$ , THF). HRMS (EI)  $m/z$   $[M + H]^+$  calculated for  $\text{C}_{18}\text{H}_{22}\text{NO}_2$ : 284.1645, found 284.1633.

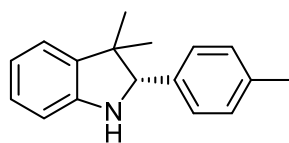

**(S)-3,3-Dimethyl-2-(p-tolyl)indoline (1d)**

It was prepared following the general procedure B and purified by silica gel flash chromatography using ethyl acetate/petroleum ether (1:9) as eluent to afford **1d** (12.1 mg, 51% yield). Yellow solid, m.p. 66-67 °C.  $^1\text{H}$  NMR (500 MHz,  $\text{CDCl}_3$ )  $\delta$  7.36 (d,  $J = 8.0$  Hz, 2H), 7.18 (d,  $J = 8.0$  Hz, 2H), 7.12–7.05 (m, 2H), 6.81 (t,  $J = 7.4$  Hz, 1H), 6.74 (d,  $J = 7.7$  Hz, 1H), 4.58 (s, 1H), 2.38 (s, 3H), 1.44 (s, 3H), 0.76 (s, 3H);  $^{13}\text{C}$

NMR (126 MHz, CDCl<sub>3</sub>)  $\delta$  149.4, 138.4, 137.3, 136.9, 129.0, 127.6, 127.6, 122.7, 119.2, 109.5, 74.6, 45.5, 26.7, 24.7, 21.3. HPLC: the ee value was determined by HPLC analysis (Chiralcel IB, *i*-PrOH/Hexane = 20/80, 1.0 mL/min, 296 nm), retention time:  $t_{\text{major}} = 10.580$  min,  $t_{\text{minor}} = 4.897$  min, ee = 90.96%;  $[\alpha]_{\text{D}}^{20} = +86.44$  (c = 0.31, THF). HRMS (EI)  $m/z$   $[M + H]^+$  calculated for C<sub>17</sub>H<sub>20</sub>N: 238.1590 found 238.1595.

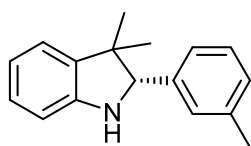

**(S)-3,3-Dimethyl-2-(m-tolyl)indoline (1e)**

It was prepared following the general procedure B and purified by silica gel flash chromatography using ethyl acetate/petroleum ether (1:9) as eluent to afford **1e** (11.7 mg, 49% yield). Pale yellow solid, m.p. 57-58 °C. <sup>1</sup>H NMR (500 MHz, CDCl<sub>3</sub>)  $\delta$  7.27–7.23 (m, 3H), 7.12–7.05 (m, 3H), 6.81 (td,  $J = 7.4, 0.9$  Hz, 1H), 6.74 (d,  $J = 7.7$  Hz, 1H), 4.57 (s, 1H), 4.24 (brs, 1H), 2.37 (s, 3H), 1.43 (s, 3H), 0.75 (s, 3H); <sup>13</sup>C NMR (126 MHz, CDCl<sub>3</sub>)  $\delta$  149.3, 139.9, 138.5, 137.9, 128.4, 128.3, 128.2, 127.6, 124.7, 122.7, 119.2, 109.4, 74.7, 45.5, 26.8, 24.7, 21.7. HPLC: the ee value was determined by HPLC analysis (Chiralcel IB, *i*-PrOH/Hexane = 10/90, 1.0 mL/min, 243 nm), retention time:  $t_{\text{major}} = 7.320$  min,  $t_{\text{minor}} = 4.840$  min, ee = 95.52%;  $[\alpha]_{\text{D}}^{20} = +100.7$  (c = 0.33, CHCl<sub>3</sub>). HRMS (EI)  $m/z$   $[M + H]^+$  calculated for C<sub>17</sub>H<sub>20</sub>N: 238.1590, found 239.1597.

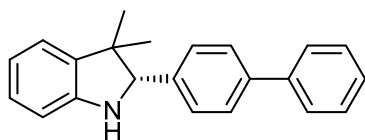

**(S)-2-([1,1'-Biphenyl]-4-yl)-3,3-dimethylindoline (1f)**

It was prepared following the general procedure B and purified by silica gel flash chromatography using ethyl acetate/petroleum ether (1:9) as eluent to afford **1f** (14.4 mg, 48% yield). Yellow solid, m.p. 87-89 °C. <sup>1</sup>H NMR (500 MHz, CDCl<sub>3</sub>)  $\delta$  7.66–

7.59 (m, 4H), 7.54 (d,  $J = 8.2$  Hz, 2H), 7.49–7.44 (m, 2H), 7.39–7.35 (m, 1H), 7.14–7.08 (m, 2H), 6.83 (td,  $J = 7.4, 0.8$  Hz, 1H), 6.77 (d,  $J = 7.7$  Hz, 1H), 4.66 (s, 1H), 1.48 (s, 3H), 0.81 (s, 3H).  $^{13}\text{C}$  NMR (126 MHz,  $\text{CDCl}_3$ )  $\delta$  149.3, 141.0, 140.6, 139.1, 138.3, 129.0, 128.1, 127.6, 127.4, 127.2, 127.0, 122.7, 119.4, 109.6, 74.5, 45.7, 26.7, 24.8. HPLC: the ee value was determined by HPLC analysis (Chiralcel IB, *i*-PrOH/Hexane = 20/80, 1.0 mL/min, 248 nm), retention time:  $t_{\text{major}} = 9.803$  min,  $t_{\text{minor}} = 6.130$  min, ee = 96.76%;  $[\alpha]_{\text{D}}^{20} = +176.2$  ( $c = 0.11$ , THF). HRMS (EI)  $m/z$   $[\text{M} + \text{H}]^+$  calculated for  $\text{C}_{22}\text{H}_{22}\text{N}$ : 300.1747, found 300.1742.

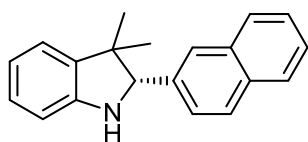

**(S)-3,3-Dimethyl-2-(naphthalen-2-yl)indoline (1g)**

It was prepared following the general procedure B and purified by silica gel flash chromatography using ethyl acetate/petroleum ether (1:9) as eluent to afford **1g** (13.2 mg, 48% yield). White solid, m.p. 87–89 °C.  $^1\text{H}$  NMR (500 MHz,  $\text{CDCl}_3$ )  $\delta$  7.95 (s, 1H), 7.89–7.82 (m, 3H), 7.59 (dd,  $J = 8.5, 1.6$  Hz, 1H), 7.53–7.47 (m, 2H), 7.17–7.08 (m, 2H), 6.84 (td,  $J = 7.4, 0.9$  Hz, 1H), 6.78 (d,  $J = 7.7$  Hz, 1H), 4.78 (s, 1H), 1.52 (s, 3H), 0.79 (s, 3H).  $^{13}\text{C}$  NMR (126 MHz,  $\text{CDCl}_3$ )  $\delta$  149.4, 138.3, 137.7, 133.4, 133.3, 128.1, 127.9, 127.8, 127.7, 126.3, 126.3, 126.0, 125.9, 122.7, 119.3, 109.5, 74.8, 45.8, 27.0, 24.9. HPLC: the ee value was determined by HPLC analysis (Chiralcel IB, *i*-PrOH/Hexane = 20/80, 1.0 mL/min, 215 nm), retention time:  $t_{\text{major}} = 12.497$  min,  $t_{\text{minor}} = 5.613$  min, ee = 93.78%;  $[\alpha]_{\text{D}}^{20} = +143.6$  ( $c = 0.29$ ,  $\text{CHCl}_3$ ). HRMS (EI)  $m/z$   $[\text{M} + \text{H}]^+$  calculated for  $\text{C}_{20}\text{H}_{20}\text{N}$ : 274.1590, found 274.1597.

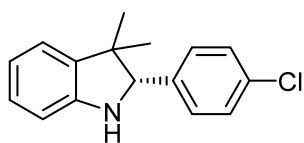

**(S)-2-(4-Chlorophenyl)-3,3-dimethylindoline (1h)**

It was prepared following the general procedure B and purified by silica gel flash chromatography using ethyl acetate/petroleum ether (1:9) as eluent to afford **1h** (13.4 mg, 52% yield). Pale yellow solid, m.p. 93-94 °C. <sup>1</sup>H NMR (500 MHz, CDCl<sub>3</sub>) δ 7.46–7.40 (m, 2H), 7.39–7.29 (m, 2H), 7.15–7.05 (m, 2H), 6.82 (td, *J* = 7.4, 0.9 Hz, 1H), 6.74 (d, *J* = 7.7 Hz, 1H), 4.59 (s, 1H), 4.12 (brs, 1H), 1.44 (s, 3H), 0.74 (s, 3H); <sup>13</sup>C NMR (126 MHz, CDCl<sub>3</sub>) δ 149.2, 138.6, 138.0, 133.3, 128.9, 128.4, 127.7, 122.7, 119.4, 109.5, 74.0, 45.5, 26.6, 24.7. HPLC: the ee value was determined by HPLC analysis (Chiralcel IB, *i*-PrOH/Hexane = 20/80, 1.0 mL/min, 254 nm), retention time: *t*<sub>major</sub> = 12.657 min, *t*<sub>minor</sub> = 5.570 min, ee = 84.22%; [ $\alpha$ ]<sub>D</sub><sup>20</sup> = + 175.4 (*c* = 0.33, THF). HRMS (EI) *m/z* [*M* + *H*]<sup>+</sup> calculated for C<sub>16</sub>H<sub>17</sub>ClN: 258.1044, found 258.1037.

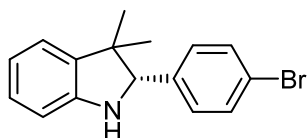

**(S)-2-(4-Bromophenyl)-3,3-dimethylindoline (1i)**

It was prepared following the general procedure B and purified by silica gel flash chromatography using ethyl acetate/petroleum ether (1:9) as eluent to afford **1i** (15.7 mg, 52% yield). Yellow solid, m.p. 76-77 °C. <sup>1</sup>H NMR (500 MHz, CDCl<sub>3</sub>) δ 7.52–7.45 (m, 2H), 7.37–7.32 (m, 2H), 7.11–7.03 (m, 2H), 6.81 (td, *J* = 7.4, 0.8 Hz, 1H), 6.74 (d, *J* = 7.7 Hz, 1H), 4.56 (s, 1H), 1.42 (s, 3H), 0.73 (s, 3H). <sup>13</sup>C NMR (126 MHz, CDCl<sub>3</sub>) δ 148.9, 139.0, 138.1, 131.4, 129.3, 127.7, 122.7, 121.5, 119.6, 109.7, 74.1, 45.6, 26.6, 24.7. HPLC: the ee value was determined by HPLC analysis (Chiralcel IB, *i*-PrOH/Hexane = 20/80, 1.0 mL/min, 215 nm), retention time: *t*<sub>major</sub> = 11.957 min, *t*<sub>minor</sub> = 5.393 min, ee = 85.10%; [ $\alpha$ ]<sub>D</sub><sup>20</sup> = + 91.6 (*c* = 0.31, THF). HRMS (EI) *m/z* [*M* + *H*]<sup>+</sup> calculated for C<sub>16</sub>H<sub>17</sub>BrN: 302.0539, found 302.0543.

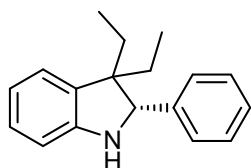

**(S)-3,3-Diethyl-2-phenylindoline (1j)**

It was prepared following the general procedure B and purified by silica gel flash chromatography using ethyl acetate/petroleum ether (1:9) as eluent to afford **1j** (13.1 mg, 52% yield). Pale yellow solid, m.p. 36-39 °C. <sup>1</sup>H NMR (500 MHz, CDCl<sub>3</sub>) δ 7.45 (d, *J* = 7.2 Hz, 2H), 7.40–7.26 (m, 3H), 7.11 (td, *J* = 7.6, 0.9 Hz, 1H), 7.01 (d, *J* = 7.2 Hz, 1H), 6.80 (t, *J* = 7.4 Hz, 1H), 6.74 (d, *J* = 7.7 Hz, 1H), 4.89 (s, 1H), 4.09 (brs, 1H), 2.03 (dq, *J* = 14.9, 7.5 Hz, 1H), 1.65 (dq, *J* = 14.7, 7.4 Hz, 1H), 1.52 (dq, *J* = 14.9, 7.5 Hz, 1H), 1.00 (t, *J* = 7.5 Hz, 3H), 0.88 (dq, *J* = 14.5, 7.4 Hz, 1H), 0.64 (d, *J* = 7.5 Hz, 3H); <sup>13</sup>C NMR (126 MHz, CDCl<sub>3</sub>) δ 150.4, 140.4, 133.7, 128.1, 127.7, 127.3, 127.3, 124.7, 118.3, 109.2, 70.2, 52.5, 27.4, 26.3, 9.4, 8.2. HPLC: the ee value was determined by HPLC analysis (Chiralcel IB, *i*-PrOH/Hexane = 20/80, 1.0 mL/min, 270 nm), retention time: *t*<sub>major</sub> = 16.910 min, *t*<sub>minor</sub> = 6.547 min, ee = 80.62%; [ $\alpha$ ]<sub>D</sub><sup>20</sup> = + 53.2 (*c* = 0.16, THF). HRMS (EI) *m/z* [*M* + *H*]<sup>+</sup> calculated for C<sub>17</sub>H<sub>22</sub>N: 252.1747, found 252.1753.

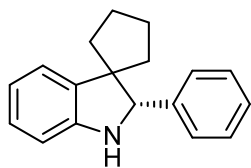

**(S)-2'-Phenylspiro[cyclopentane-1,3'-indoline] (1k)**

It was prepared following the general procedure B and purified by silica gel flash chromatography using ethyl acetate/petroleum ether (1:9) as eluent to afford **1k** (11.8 mg, 47% yield). Yellow solid, m.p. 49-51 °C. <sup>1</sup>H NMR (500 MHz, CDCl<sub>3</sub>) δ 7.38 (dt, *J* = 3.8, 2.1 Hz, 2H), 7.35–7.27 (m, 3H), 7.13–7.04 (m, 2H), 6.80 (td, *J* = 7.4, 0.9 Hz, 1H), 6.72 (d, *J* = 7.6 Hz, 1H), 4.66 (s, 1H), 2.08–1.98 (m, 2H), 1.87–1.77 (m, 1H), 1.74–1.60 (m, 2H), 1.46 (t, *J* = 7.2 Hz, 2H), 1.29–1.21 (m, 1H). <sup>13</sup>C NMR (126 MHz, CDCl<sub>3</sub>) δ 149.7, 141.2, 138.3, 128.4, 127.84, 127.82, 127.5, 123.0, 119.4, 109.2, 73.9, 57.5, 39.9, 35.1, 24.8, 24.8. HPLC: the ee value was determined by HPLC analysis (Chiralcel IB, *i*-PrOH/Hexane = 20/80, 1.0 mL/min, 300 nm), retention time: *t*<sub>major</sub> = 7.987 min, *t*<sub>minor</sub> = 5.530 min, ee = 96.04%; [ $\alpha$ ]<sub>D</sub><sup>20</sup> = + 13.5 (*c* = 0.27, THF). HRMS (EI) *m/z* [*M* + *H*]<sup>+</sup> calculated for C<sub>18</sub>H<sub>20</sub>N: 250.1590, found 250.1587.

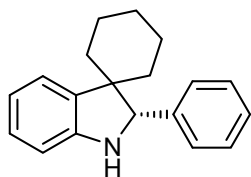

**(S)-2'-Phenylspiro[cyclohexane-1,3'-indoline (1l)**

It was prepared following the general procedure B and purified by silica gel flash chromatography using ethyl acetate/petroleum ether (1:9) as eluent to afford **1l** (12.7 mg, 48% yield). White solid, m.p. 76-77 °C. <sup>1</sup>H NMR (500 MHz, CDCl<sub>3</sub>) δ 7.34–7.25 (m, 6H), 7.10 (td, *J* = 7.6, 1.2 Hz, 1H), 6.78 (td, *J* = 7.4, 0.7 Hz, 1H), 6.70 (d, *J* = 7.7 Hz, 1H), 4.58 (s, 1H), 1.90–1.78 (m, 2H), 1.71 (dd, *J* = 11.9, 6.6 Hz, 2H), 1.61–1.53 (m, 1H), 1.52–1.37 (m, 3H), 1.25–1.10 (m, 2H). <sup>13</sup>C NMR (126 MHz, CDCl<sub>3</sub>) δ 150.1, 141.3, 137.5, 128.3, 128.1, 127.8, 127.7, 124.5, 118.8, 109.1, 73.2, 49.4, 37.6, 32.0, 26.0, 23.2, 22.4. HPLC: the ee value was determined by HPLC analysis (Chiralcel IB, *i*-PrOH/Hexane = 10/90, 1.0 mL/min, 305 nm), retention time: *t*<sub>major</sub> = 8.070 min, *t*<sub>minor</sub> = 5.913 min, ee = 95.26%; [ $\alpha$ ]<sub>D</sub><sup>20</sup> = - 54.7 (*c* = 0.34, THF). HRMS (EI) *m/z* [*M* + *H*]<sup>+</sup> calculated for C<sub>19</sub>H<sub>22</sub>N: 264.1747, found 264.1738.

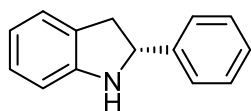

**(R)-2-Phenylindoline (1m)**

It was prepared following the general procedure B and purified by silica gel flash chromatography using ethyl acetate/petroleum ether (1:9) as eluent to afford **1m** (10.4 mg, 53% yield). Yellow oil. <sup>1</sup>H NMR (400 MHz, CDCl<sub>3</sub>) δ 7.37 (dd, *J* = 5.4, 3.4 Hz, 2H), 7.31–7.25 (m, 2H), 7.22 (dt, *J* = 5.1, 2.1 Hz, 1H), 7.02 (dd, *J* = 12.5, 7.4 Hz, 2H), 6.69 (td, *J* = 7.5, 0.8 Hz, 1H), 6.62 (d, *J* = 7.7 Hz, 1H), 4.90 (t, *J* = 9.0 Hz, 1H), 3.39 (dd, *J* = 15.6, 9.2 Hz, 1H), 2.94 (dd, *J* = 15.6, 8.8 Hz, 1H). <sup>13</sup>C NMR (101 MHz, CDCl<sub>3</sub>) δ 150.9, 144.6, 128.8, 128.4, 127.8, 127.7, 126.5, 125.4, 124.8, 119.2, 109.3, 63.7, 39.7. HPLC: the ee value was determined by HPLC analysis (Chiralcel IB, *i*-PrOH/Hexane = 10/90, 1.0 mL/min, 215 nm), retention time: *t*<sub>major</sub> = 8.923 min, *t*<sub>minor</sub> = 14.263 min, ee = 69.92%; [ $\alpha$ ]<sub>D</sub><sup>20</sup> = + 31.6 (*c* = 0.18, THF). HRMS (EI) *m/z* [*M* + *H*]<sup>+</sup> calculated for C<sub>14</sub>H<sub>14</sub>N: 196.1121, found 196.1115.



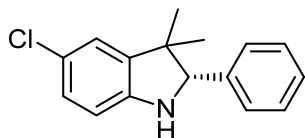

**(S)-5-Chloro-3,3-dimethyl-2-phenylindoline (3a)**

It was prepared following the general procedure B and purified by silica gel flash chromatography using ethyl acetate/petroleum ether (1:9) as eluent to afford **3a** (12.4 mg, 48% yield). Yellow solid, m.p. 81-83 °C. <sup>1</sup>H NMR (500 MHz, CDCl<sub>3</sub>) δ 7.49–7.40 (m, 2H), 7.40–7.29 (m, 3H), 7.03 (dd, *J* = 8.2, 2.2 Hz, 1H), 6.99 (d, *J* = 2.1 Hz, 1H), 6.63 (d, *J* = 8.2 Hz, 1H), 4.61 (s, 1H), 1.42 (s, 3H), 0.74 (s, 3H); <sup>13</sup>C NMR (126 MHz, CDCl<sub>3</sub>) δ 147.9, 140.3, 139.5, 128.4, 127.9, 127.6, 127.3, 123.8, 123.1, 110.2, 75.0, 45.9, 26.7, 24.6. HPLC: the ee value was determined by HPLC analysis (Chiralcel IB, *i*-PrOH/Hexane = 20/80, 1.0 mL/min, 215 nm), retention time: *t*<sub>major</sub> = 17.350 min, *t*<sub>minor</sub> = 6.153 min, ee = 93.52%; [ $\alpha$ ]<sub>D</sub><sup>20</sup> = + 113.8 (*c* = 0.42, THF). HRMS (EI) *m/z* [*M* + *H*]<sup>+</sup> calculated for C<sub>16</sub>H<sub>17</sub>ClN: 258.1044, found 258.1051.

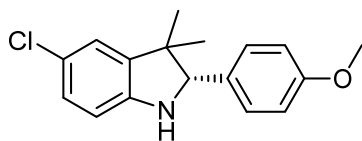

**(S)-5-Chloro-2-(4-methoxyphenyl)-3,3-dimethylindoline (3b)**

It was prepared following the general procedure B and purified by silica gel flash chromatography using ethyl acetate/petroleum ether (2:8) as eluent to afford **3b** (13.8 mg, 48% yield). White solid, m.p. 106-107 °C. <sup>1</sup>H NMR (500 MHz, CDCl<sub>3</sub>) δ 7.39–7.30 (m, 2H), 7.01 (dd, *J* = 8.2, 2.2 Hz, 1H), 6.98 (d, *J* = 2.1 Hz, 1H), 6.92–6.83 (m, 2H), 6.61 (d, *J* = 8.2 Hz, 1H), 4.54 (s, 1H), 3.82 (s, 3H), 1.38 (s, 3H), 0.73 (s, 3H); <sup>13</sup>C NMR (126 MHz, CDCl<sub>3</sub>) δ 159.4, 148.0, 140.4, 131.5, 128.6, 127.2, 123.7, 123.1, 113.7, 110.2, 74.5, 55.5, 45.8, 26.6, 24.5. HPLC: the ee value was determined by HPLC analysis (Chiralcel IB, *i*-PrOH/Hexane = 20/80, 1.0 mL/min, 255 nm), retention time: *t*<sub>major</sub> = 12.883 min, *t*<sub>minor</sub> = 5.277 min, ee = 95.36%; [ $\alpha$ ]<sub>D</sub><sup>20</sup> = + 71.62 (*c* = 0.21, THF). HRMS (EI) *m/z* [*M* + *H*]<sup>+</sup> calculated for C<sub>17</sub>H<sub>19</sub>ClNO: 288.1150, found 288.1152.

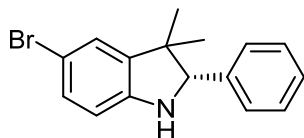

**(S)-5-Bromo-3,3-dimethyl-2-phenylindoline (3c)**

It was prepared following the general procedure B and purified by silica gel flash chromatography using ethyl acetate/petroleum ether (1:9) as eluent to afford **3c** (14.2 mg, 47% yield). Yellow solid, m.p. 77-79 °C. <sup>1</sup>H NMR (500 MHz, CDCl<sub>3</sub>) δ 7.42 (dd, *J* = 8.2, 1.2 Hz, 2H), 7.38–7.31 (m, 3H), 7.17 (dd, *J* = 8.2, 2.0 Hz, 1H), 7.12 (d, *J* = 2.0 Hz, 1H), 6.59 (d, *J* = 8.2 Hz, 1H), 4.60 (s, 1H), 1.41 (s, 3 H), 0.73 (s, 3H). <sup>13</sup>C NMR (126 MHz, CDCl<sub>3</sub>) δ 148.4, 140.7, 139.5, 130.2, 128.4, 127.9, 127.5, 125.9, 110.8, 74.9, 45.9, 26.7, 24.6. HPLC: the ee value was determined by HPLC analysis (Chiralcel IB, *i*-PrOH/Hexane = 20/80, 1.0 mL/min, 320 nm), retention time: *t*<sub>major</sub> = 16.910 min, *t*<sub>minor</sub> = 6.030 min, ee = 95.72%; [ $\alpha$ ]<sub>D</sub><sup>20</sup> = + 116.7 (*c* = 0.29, THF). HRMS (EI) *m/z* [*M* + *H*]<sup>+</sup> calculated for C<sub>16</sub>H<sub>17</sub>BrN: 302.0539, found 302.0533.

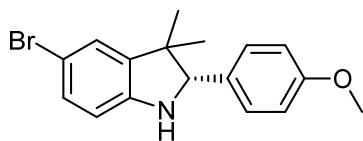

**(S)-5-Bromo-2-(4-methoxyphenyl)-3,3-dimethylindoline (3d)**

It was prepared following the general procedure B and purified by silica gel flash chromatography using ethyl acetate/petroleum ether (2:8) as eluent to afford **3d** (15.6 mg, 47% yield). Yellow solid, m.p. 102-103 °C. <sup>1</sup>H NMR (500 MHz, CDCl<sub>3</sub>) δ 7.35–7.30 (m, 2H), 7.15 (dd, *J* = 8.2, 2.0 Hz, 1H), 7.11 (d, *J* = 2.0 Hz, 1H), 6.91–6.85 (m, 2H), 6.57 (d, *J* = 8.2 Hz, 1H), 4.53 (s, 1H), 3.82 (s, 3H), 1.37 (s, 3H), 0.73 (s, 3H); <sup>13</sup>C NMR (126 MHz, CDCl<sub>3</sub>) δ 159.4, 148.5, 140.8, 131.5, 130.1, 128.6, 125.9, 113.8, 110.7, 74.5, 55.5, 45.7, 26.7, 24.5. HPLC: the ee value was determined by HPLC analysis (Chiralcel IB, *i*-PrOH/Hexane = 20/80, 1.0 mL/min, 307 nm), retention time: *t*<sub>major</sub> = 13.857 min, *t*<sub>minor</sub> = 5.370 min, ee = 96.00%; [ $\alpha$ ]<sub>D</sub><sup>20</sup> = + 80.72 (*c* = 0.15, CHCl<sub>3</sub>). HRMS (EI) *m/z* [*M* + *H*]<sup>+</sup> calculated for C<sub>17</sub>H<sub>19</sub>BrNO: 332.0645, found 332.0634.

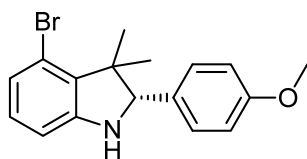

**(S)-4-Bromo-2-(4-methoxyphenyl)-3,3-dimethylindoline(3e)**

It was prepared following the general procedure B and purified by silica gel flash chromatography using ethyl acetate/petroleum ether (2:8) as eluent to afford **3e** (16.3 mg, 49% yield). Yellow solid, m.p. 95-96 °C.  $^1\text{H}$  NMR (500 MHz,  $\text{CDCl}_3$ )  $\delta$  7.37 (d,  $J = 8.6$  Hz, 2H), 7.00–6.84 (m, 4H), 6.62 (dd,  $J = 7.0, 1.6$  Hz, 1H), 4.52 (s, 1H), 3.83 (s, 3H), 1.57 (s, 3H), 0.86 (s, 3H);  $^{13}\text{C}$  NMR (126 MHz,  $\text{CDCl}_3$ )  $\delta$  159.5, 151.6, 134.7, 131.0, 129.2, 129.1, 123.9, 119.6, 113.7, 108.4, 74.0, 55.5, 47.8, 25.7, 21.7. HPLC: the ee value was determined by HPLC analysis (Chiralcel IB, *i*-PrOH/Hexane = 20/80, 1.0 mL/min, 215 nm), retention time:  $t_{\text{major}} = 10.933$  min,  $t_{\text{minor}} = 6.173$  min, ee = 90.04%;  $[\alpha]_{\text{D}}^{20} = +83.1$  ( $c = 0.17$ , THF). HRMS (EI)  $m/z$   $[\text{M} + \text{H}]^+$  calculated for  $\text{C}_{17}\text{H}_{19}\text{BrNO}$ : 332.0645, found 332.0641.

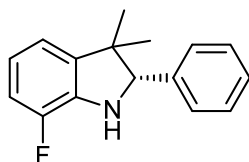

**(S)-7-Fluoro-3,3-dimethyl-2-phenylindoline (3f)**

It was prepared following the general procedure B and purified by silica gel flash chromatography using ethyl acetate/petroleum ether (1:9) as eluent to afford **3f** (12.6 mg, 52% yield). Brown solid, m.p. 38-39 °C.  $^1\text{H}$  NMR (500 MHz,  $\text{CDCl}_3$ )  $\delta$  7.49–7.45 (m, 2H), 7.41–7.29 (m, 3H), 6.92–6.81 (m, 2H), 6.75–6.70 (m, 1H), 4.65 (s, 1H), 1.44 (s, 3H), 0.75 (s, 3H).  $^{13}\text{C}$  NMR (126 MHz,  $\text{CDCl}_3$ )  $\delta$  149.1 (d,  $J = 240.3$  Hz), 141.9 (d,  $J = 4.5$  Hz), 139.4, 128.4, 127.9, 127.6, 119.7 (d,  $J = 5.6$  Hz), 118.2 (d,  $J = 2.9$  Hz), 114.2 (d,  $J = 17.4$  Hz), 75.3, 46.3 (d,  $J = 2.4$  Hz), 26.6, 24.6. HPLC: the ee value was determined by HPLC analysis (Chiralcel IB, *i*-PrOH/Hexane = 20/80, 1.0 mL/min, 240 nm), retention time:  $t_{\text{major}} = 5.840$  min,  $t_{\text{minor}} = 4.547$  min, ee = 74.36%;  $[\alpha]_{\text{D}}^{20} = +12.6$  ( $c = 0.12$ , THF). HRMS (EI)  $m/z$   $[\text{M} + \text{H}]^+$  calculated for  $\text{C}_{16}\text{H}_{17}\text{FN}$ : 242.1340, found 242.1331.

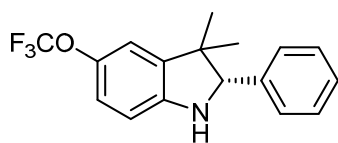

**(S)-3,3-Dimethyl-2-phenyl-5-(trifluoromethoxy)indoline (3g)**

It was prepared following the general procedure B and purified by silica gel flash chromatography using ethyl acetate/petroleum ether (1:9) as eluent to afford **3g** (15.4 mg, 50% yield). Yellow solid, m.p. 67-69 °C.  $^1\text{H}$  NMR (500 MHz,  $\text{CDCl}_3$ )  $\delta$  7.46–7.42 (m, 2H), 7.41–7.30 (m, 3H), 6.93 (dd,  $J = 15.4, 7.0$  Hz, 2H), 6.65 (d,  $J = 8.3$  Hz, 1H), 4.65 (s, 1H), 1.44 (s, 3H), 0.75 (s, 3H).  $^{13}\text{C}$  NMR (126 MHz,  $\text{CDCl}_3$ )  $\delta$  148.1, 142.3, 139.8, 139.5, 128.4, 128.0, 127.6, 121.0 (q,  $J = 255.1$  Hz), 120.6, 116.6, 109.2, 75.1, 45.8, 26.6, 24.6. HPLC: the ee value was determined by HPLC analysis (Chiralcel IB, *i*-PrOH/Hexane = 20/80, 1.0 mL/min, 304 nm), retention time:  $t_{\text{major}} = 15.567$  min,  $t_{\text{minor}} = 6.167$  min, ee = 86.68%;  $[\alpha]_{\text{D}}^{20} = +56.43$  (c = 0.33, THF). HRMS (EI)  $m/z$   $[\text{M} + \text{H}]^+$  calculated for  $\text{C}_{17}\text{H}_{17}\text{F}_3\text{NO}$ : 308.1257, found 308.1262.

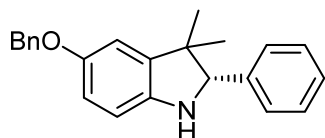

**(S)-5-(Benzyloxy)-3,3-dimethyl-2-phenylindoline (3h)**

It was prepared following the general procedure B and purified by silica gel flash chromatography using ethyl acetate/petroleum ether (2:8) as eluent to afford **3h** (17.2 mg, 52% yield). Yellow solid, m.p. 93-95 °C.  $^1\text{H}$  NMR (500 MHz,  $\text{CDCl}_3$ )  $\delta$  7.47 (d,  $J = 7.3$  Hz, 2H), 7.39 (m, 5H), 7.09 (dd,  $J = 14.9, 7.4$  Hz, 2H), 6.99 (d,  $J = 8.6$  Hz, 2H), 6.81 (t,  $J = 7.4$  Hz, 1H), 6.73 (d,  $J = 7.7$  Hz, 1H), 5.09 (s, 2H), 4.56 (s, 1H), 1.42 (s, 3H), 0.77 (s, 3H).  $^{13}\text{C}$  NMR (126 MHz,  $\text{CDCl}_3$ )  $\delta$  158.5, 149.4, 138.4, 137.3, 132.3, 128.8, 128.7, 128.2, 127.7, 127.5, 122.7, 119.2, 114.6, 109.4, 72.2, 70.2, 45.4, 26.6, 24.6. HPLC: the ee value was determined by HPLC analysis (Chiralcel IB, *i*-PrOH/Hexane = 20/80, 1.0 mL/min, 215 nm), retention time:  $t_{\text{major}} = 20.373$  min,  $t_{\text{minor}} = 6.627$  min, ee = 81.08%;  $[\alpha]_{\text{D}}^{20} = +166.6$  (c = 0.41, THF). HRMS (EI)  $m/z$   $[\text{M} + \text{H}]^+$  calculated for  $\text{C}_{23}\text{H}_{24}\text{NO}$ : 330.1852, found 330.1871.

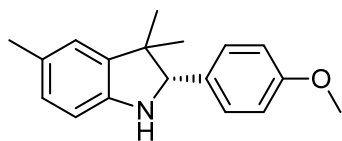

**(S)-2-(4-Methoxyphenyl)-3,3,5-trimethylindoline (3i)**

It was prepared following the general procedure B and purified by silica gel flash chromatography using ethyl acetate/petroleum ether (2:8) as eluent to afford **3i** (13.1 mg, 49% yield). Pale yellow solid, m.p. 61-62 °C. <sup>1</sup>H NMR (500 MHz, CDCl<sub>3</sub>) δ 7.38 (d, *J* = 8.5 Hz, 2H), 6.90 (m, 4H), 6.64 (d, *J* = 7.7 Hz, 1H), 4.53 (s, 1H), 3.83 (s, 3H), 2.31 (s, 3H), 1.40 (s, 3H), 0.74 (s, 3H). <sup>13</sup>C NMR (126 MHz, CDCl<sub>3</sub>) δ 159.2, 147.0, 138.7, 132.2, 128.7, 128.5, 127.8, 123.5, 113.6, 109.3, 74.5, 55.5, 45.4, 26.5, 24.6, 21.2. HPLC: the ee value was determined by HPLC analysis (Chiralcel IB, *i*-PrOH/Hexane = 20/80, 1.0 mL/min, 215 nm), retention time: *t*<sub>major</sub> = 9.197 min, *t*<sub>minor</sub> = 5.367 min, ee = 92.34%; [ $\alpha$ ]<sub>D</sub><sup>20</sup> = +113.4 (*c* = 0.17, THF). HRMS (EI) *m/z* [M + H]<sup>+</sup> calculated for C<sub>18</sub>H<sub>21</sub>NO: 268.1696, found 268.1704.

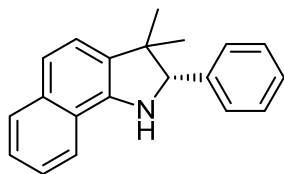

**(S)-3,3-Dimethyl-2-phenyl-2,3-dihydro-1H-benzo[g]indole (3j)**

It was prepared following the general procedure B and purified by silica gel flash chromatography using CH<sub>2</sub>Cl<sub>2</sub>/petroleum ether (1:1) as eluent to afford **3j** (13.7 mg, 50% yield). Yellow solid, m.p. 84-85 °C. <sup>1</sup>H NMR (500 MHz, CDCl<sub>3</sub>) δ 7.97 (d, *J* = 8.6 Hz, 1H), 7.79 (d, *J* = 8.2 Hz, 1H), 7.65 (d, *J* = 8.5 Hz, 1H), 7.58–7.53 (m, 2H), 7.43–7.32 (m, 4H), 7.23 (m, 1H), 7.07 (d, *J* = 8.5 Hz, 1H), 4.72 (s, 1H), 1.77 (s, 3H), 1.01 (s, 3H); <sup>13</sup>C NMR (126 MHz, CDCl<sub>3</sub>) δ 139.7, 131.2, 130.0, 129.7, 129.1, 128.3, 128.3, 127.9, 126.4, 121.8, 113.1, 75.4, 47.4, 27.6, 23.2. HPLC: the ee value was determined by HPLC analysis (Chiralcel IB, *i*-PrOH/Hexane = 20/80, 1.0 mL/min, 248 nm), retention time: *t*<sub>major</sub> = 9.923 min, *t*<sub>minor</sub> = 6.053 min, ee = 80.50%; [ $\alpha$ ]<sub>D</sub><sup>20</sup> = +

176.2 ( $c = 0.31$ , THF). HRMS (EI)  $m/z$   $[M + H]^+$  calculated for  $C_{20}H_{20}N$ : 274.1590, found 274.1586.

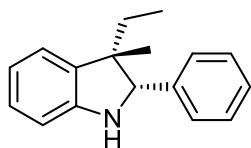

**(2S,3S)-3-Ethyl-3-methyl-2-phenylindoline (5a)**

It was prepared following the general procedure B and purified by silica gel flash chromatography using  $CH_2Cl_2$ /petroleum ether (1:1) as eluent to afford **5a** (11.4 mg, 48% yield). Pale yellow solid, m.p. 63–64 °C.  $^1H$  NMR (500 MHz,  $CDCl_3$ )  $\delta$  7.65 (d,  $J = 7.3$  Hz, 2H), 7.49 (dt,  $J = 25.6, 7.2$  Hz, 3H), 7.24 (dd,  $J = 16.3, 7.7$  Hz, 2H), 6.94 (t,  $J = 7.4$  Hz, 1H), 6.86 (d,  $J = 7.7$  Hz, 1H), 4.81 (s, 1H), 4.07 (brs, 1H), 1.60–1.52 (m, 4H), 0.95–0.87 (m, 1H), 0.80 (t,  $J = 7.4$  Hz, 3H);  $^{13}C$  NMR (126 MHz,  $CDCl_3$ )  $\delta$  149.9, 139.5, 136.2, 128.2, 127.8, 127.6, 127.5, 124.3, 118.6, 109.6, 76.0, 48.4, 28.0, 22.6, 8.4. HPLC: the ee value was determined by HPLC analysis (Chiralcel IB, *i*-PrOH/Hexane = 20/80, 1.0 mL/min, 301 nm), retention time:  $t_{major} = 12.993$  min,  $t_{minor} = 6.150$  min, ee = 93.04%;  $[\alpha]_D^{20} = +34.6$  ( $c = 0.13$ , THF). HRMS (EI)  $m/z$   $[M + H]^+$  calculated for  $C_{17}H_{20}N$ : 238.1590, found 238.1597. The absolute configuration was assigned as *S* by comparing the optical rotation and HPLC analysis with reported data<sup>[5]</sup>. The diastereomer was determined by comparing with reported data.<sup>[5]</sup>

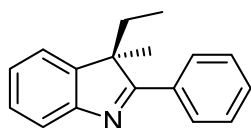

**(R)-3-Ethyl-3-methyl-2-phenyl-3H-indole (6a)**

It was prepared following the general procedure B and purified by silica gel flash chromatography using  $CH_2Cl_2$ /petroleum ether (1:1) as eluent to afford **6a** (10.6 mg, 45% yield). Yellow oil.  $^1H$  NMR (500 MHz,  $CDCl_3$ )  $\delta$  8.08–8.02 (m, 2H), 7.62 (d,  $J = 7.7$  Hz, 1H), 7.44–7.39 (m, 3H), 7.29 (ddd,  $J = 7.7, 6.8, 2.0$  Hz, 1H), 7.23–7.18 (m, 2H), 2.20 (dq,  $J = 14.7, 7.4$  Hz, 1H), 2.06 (dq,  $J = 14.8, 7.4$  Hz, 1H), 1.51 (s, 3H), 0.30 (t,  $J = 7.4$  Hz, 3H);  $^{13}C$  NMR (126 MHz,  $CDCl_3$ )  $\delta$  182.5, 145.7, 130.8, 128.9,

128.3, 128.0, 126.0, 121.2, 120.9, 59.6, 59.0, 32.2, 24.5, 8.9. HPLC: the ee value was determined by HPLC analysis (Chiralcel OD, *i*-PrOH/Hexane = 10/90, 1.0 mL/min, 331 nm), retention time:  $t_{\text{major}} = 4.163$  min,  $t_{\text{minor}} = 5.743$  min, ee = 81.32%;  $[\alpha]_{\text{D}}^{20} = +12.2$  (c = 0.12, THF). HRMS (EI)  $m/z$   $[M + H]^+$  calculated for  $\text{C}_{17}\text{H}_{18}\text{N}$ : 236.1434, found 236.1439.

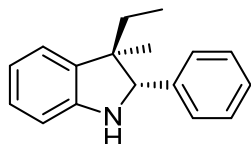

**(2*S*,3*R*)-3-Ethyl-3-methyl-2-phenylindoline (5b)**

It was prepared following the general procedure B and purified by silica gel flash chromatography using  $\text{CH}_2\text{Cl}_2$ /petroleum ether (1:1) as eluent to afford **5b** (10.9 mg, 46% yield). Yellow solid, m.p. 37–39 °C.  $^1\text{H}$  NMR (500 MHz,  $\text{CDCl}_3$ )  $\delta$  7.40–7.26 (m, 5H), 7.09 (t,  $J = 7.6$  Hz, 1H), 7.00 (d,  $J = 7.3$  Hz, 1H), 6.79 (t,  $J = 7.4$  Hz, 1H), 6.73 (d,  $J = 7.7$  Hz, 1H), 4.73 (s, 1H), 1.89–1.63 (m, 2H), 1.00 (td,  $J = 7.4, 1.2$  Hz, 3H), 0.77 (s, 3H);  $^{13}\text{C}$  NMR (126 MHz,  $\text{CDCl}_3$ )  $\delta$  150.1, 141.3, 135.9, 128.3, 127.6, 127.5, 123.5, 118.9, 109.0, 70.3, 49.7, 32.4, 23.7, 9.6. HPLC: the ee value was determined by HPLC analysis (Chiralcel IB, *i*-PrOH/Hexane = 20/80, 1.0 mL/min, 272 nm), retention time:  $t_{\text{major}} = 9.067$  min,  $t_{\text{minor}} = 5.070$  min, ee = 81.22%;  $[\alpha]_{\text{D}}^{20} = +87.6$  (c = 0.26, THF). HRMS (EI)  $m/z$   $[M + H]^+$  calculated for  $\text{C}_{17}\text{H}_{19}\text{N}$ : 238.1590, found 238.1597. The diastereomer was determined by comparing with reported data.<sup>[5]</sup>

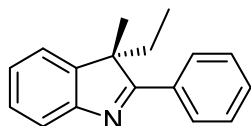

**(*S*)-3-Ethyl-3-methyl-2-phenyl-3H-indole (6b)**

It was prepared following the general procedure B and purified by silica gel flash chromatography using  $\text{CH}_2\text{Cl}_2$ /petroleum ether (1:1) as eluent to afford **6b** (11.1 mg, 47% yield). Yellow oil.  $^1\text{H}$  NMR (500 MHz,  $\text{CDCl}_3$ )  $\delta$  8.08–8.02 (m, 2H), 7.62 (d,  $J$

= 7.7 Hz, 1H), 7.44–7.39 (m, 3H), 7.29 (ddd,  $J$  = 7.7, 6.8, 2.0 Hz, 1H), 7.23–7.18 (m, 2H), 2.20 (dq,  $J$  = 14.7, 7.4 Hz, 1H), 2.06 (dq,  $J$  = 14.8, 7.4 Hz, 1H), 1.51 (s, 3H), 0.30 (t,  $J$  = 7.4 Hz, 3H);  $^{13}\text{C}$  NMR (126 MHz,  $\text{CDCl}_3$ )  $\delta$  182.5, 145.7, 130.8, 128.9, 128.3, 128.0, 126.0, 121.2, 120.9, 59.6, 59.0, 32.2, 24.5, 8.9. HPLC: the ee value was determined by HPLC analysis (Chiralcel OD, *i*-PrOH/Hexane = 10/90, 1.0 mL/min, 331 nm), retention time:  $t_{\text{major}}$  = 5.773 min,  $t_{\text{minor}}$  = 4.173 min, ee = 82.22%;  $[\alpha]_{\text{D}}^{20}$  = -33.0 ( $c$  = 0.20, THF). HRMS (EI)  $m/z$   $[\text{M} + \text{H}]^+$  calculated for  $\text{C}_{17}\text{H}_{18}\text{N}$ : 236.1434, found 236.1445.

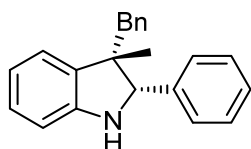

**(2S,3S)-3-Benzyl-3-methyl-2-phenylindoline (5c)**

It was prepared following the general procedure B and purified by silica gel flash chromatography using ethyl acetate/petroleum ether (2:8) as eluent to afford **5c** (13.5 mg, 45% yield). White solid, m.p. 84–85 °C.  $^1\text{H}$  NMR (500 MHz,  $\text{CDCl}_3$ )  $\delta$  7.63 (d,  $J$  = 7.3 Hz, 2H), 7.43 (t,  $J$  = 7.4 Hz, 2H), 7.37 (dd,  $J$  = 8.3, 6.3 Hz, 1H), 7.17–7.07 (m, 4H), 6.82 (d,  $J$  = 7.7 Hz, 1H), 6.67–6.56 (m, 3H), 6.20 (d,  $J$  = 7.3 Hz, 1H), 4.82 (brs, 1H), 2.72 (d,  $J$  = 12.8 Hz, 1H), 1.80 (d,  $J$  = 12.8 Hz, 1H), 1.39 (s, 3H).  $^{13}\text{C}$  NMR (101 MHz,  $\text{CDCl}_3$ )  $\delta$  149.7, 139.0, 138.1, 134.9, 131.5, 128.4, 128.1, 127.9, 127.7, 127.3, 126.0, 125.8, 118.2, 109.6, 76.5, 49.0, 41.4, 22.5. HPLC: the ee value was determined by HPLC analysis (Chiralcel IB, *i*-PrOH/Hexane = 20/80, 1.0 mL/min, 215 nm), retention time:  $t_{\text{major}}$  = 15.097 min,  $t_{\text{minor}}$  = 5.897 min, ee = 81.16%; HRMS (EI)  $m/z$   $[\text{M} + \text{H}]^+$  calculated for  $\text{C}_{22}\text{H}_{22}\text{N}$ : 300.1747, found 300.1756. The diastereomer was determined by comparing with reported synthetic method.<sup>[5]</sup>

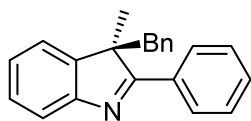

**(R)-3-Benzyl-3-methyl-2-phenyl-3H-indole (6c)**



It was prepared following the general procedure B and purified by silica gel flash chromatography using ethyl acetate/petroleum ether (2:8) as eluent to afford **6c** (13.7 mg, 46% yield). White solid, m.p. 80–82 °C. <sup>1</sup>H NMR (400 MHz, CDCl<sub>3</sub>) δ 8.13 (dd, *J* = 6.7, 3.0 Hz, 2H), 7.45 (dd, *J* = 8.1, 4.7 Hz, 4H), 7.30–7.21 (m, 1H), 7.19–7.15 (m, 2H), 6.97–6.90 (m, 1H), 6.85 (dd, *J* = 10.2, 4.6 Hz, 2H), 6.49 (d, *J* = 7.2 Hz, 2H), 3.31 (q, *J* = 13.5 Hz, 2H), 1.68 (s, 3H). <sup>13</sup>C NMR (101 MHz, CDCl<sub>3</sub>) δ 181.5, 145.0, 136.1, 130.9, 129.5, 128.9, 128.7, 128.1, 127.7, 126.7, 125.7, 122.3, 121.0, 56.0, 44.7, 24.2. HPLC: the ee value was determined by HPLC analysis (Chiralcel IB, *i*-PrOH/Hexane = 20/80, 1.0 mL/min, 215 nm), retention time: *t*<sub>major</sub> = 3.680 min, *t*<sub>minor</sub> = 4.010 min, ee = 87.84%; HRMS (EI) *m/z* [M + H]<sup>+</sup> calculated for C<sub>22</sub>H<sub>20</sub>N: 298.1590, found 298.1584.

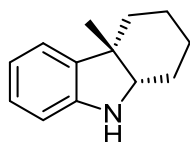

**(4aS,9aS)-4a-Methyl-2,3,4,4a,9,9a-hexahydro-1H-carbazole (5d)**

It was prepared following the general procedure B and purified by silica gel flash chromatography using ethyl acetate/petroleum ether (1:9) as eluent to afford **5d** (8.8 mg, 47% yield). Yellow oil. <sup>1</sup>H NMR (400 MHz, CDCl<sub>3</sub>) δ 7.09–7.02 (m, 2H), 6.77 (td, *J* = 7.5, 0.9 Hz, 1H), 6.70 (d, *J* = 7.6 Hz, 1H), 3.43 (t, *J* = 4.4 Hz, 1H), 1.75–1.58 (m, 4H), 1.45 (m, 4H), 1.33 (s, 3H). <sup>13</sup>C NMR (101 MHz, CDCl<sub>3</sub>) δ 149.6, 139.6, 127.1, 121.7, 119.0, 110.3, 66.1, 42.9, 35.2, 27.7, 23.8, 21.7, 21.3. HPLC: the ee value was determined by HPLC analysis (Chiralcel IB, *i*-PrOH/Hexane = 3/97, 1.0 mL/min, 215 nm), retention time: *t*<sub>major</sub> = 5.473 min, *t*<sub>minor</sub> = 4.823 min, ee = 88.32%; [α]<sub>D</sub><sup>20</sup> = - 26.4 (c = 0.35, THF). HRMS (EI) *m/z* [M + H]<sup>+</sup> calculated for C<sub>13</sub>H<sub>18</sub>N: 188.1434, found 188.1427. The absolute configuration was assigned as *S* by comparing the optical rotation with reported data.<sup>[7]</sup> The diastereomer was determined by comparing with reported data.<sup>[7]</sup>

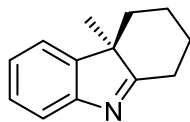

**(*R*)-4a-Methyl-2,3,4,4a-tetrahydro-1H-carbazole (6d)**

It was prepared following the general procedure B and purified by silica gel flash chromatography using ethyl acetate/petroleum ether (1:9) as eluent to afford **6e** (8.4 mg, 45% yield). Yellow oil.  $^1\text{H}$  NMR (400 MHz,  $\text{CDCl}_3$ )  $\delta$  7.60 (d,  $J = 7.7$  Hz, 1H), 7.37–7.28 (m, 2H), 7.19 (td,  $J = 7.4$ , 0.8 Hz, 1H), 2.92–2.83 (m, 1H), 2.59 (td,  $J = 13.3$ , 5.7 Hz, 1H), 2.23 (ddd,  $J = 25.8$ , 13.2, 2.6 Hz, 2H), 1.85–1.68 (m, 2H), 1.42 (dt,  $J = 13.3$ , 4.3 Hz, 1H), 1.31 (s, 3H), 1.22–1.13 (m, 1H).  $^{13}\text{C}$  NMR (101 MHz,  $\text{CDCl}_3$ )  $\delta$  190.6, 154.2, 147.0, 127.7, 125.1, 121.6, 120.3, 54.0, 38.9, 29.9, 29.2, 21.6, 20.0. HPLC: the ee value was determined by HPLC analysis (Chiralcel OJ, *i*-PrOH/Hexane = 1/99, 1.0 mL/min, 253 nm), retention time:  $t_{\text{minor}} = 8.303$  min,  $t_{\text{major}} = 10.370$  min, ee = 80.86%;  $[\alpha]_{\text{D}}^{20} = +34.2$  ( $c = 0.7$ , THF). HRMS (EI)  $m/z$   $[\text{M} + \text{H}]^+$  calculated for  $\text{C}_{13}\text{H}_{16}\text{N}$ : 186.1277, found 186.1261. The absolute configuration was assigned as *R* by comparing the optical rotation and HPLC analysis with reported data.<sup>[7]</sup>

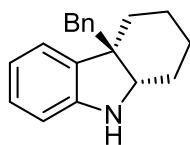

**(4a*R*,9a*S*)-4a-Benzyl-2,3,4,4a,9,9a-hexahydro-1H-carbazole (5e)**

It was prepared following the general procedure B and purified by silica gel flash chromatography using ethyl acetate/petroleum ether (1:9) as eluent to afford **5e** (12.1 mg, 46% yield). Pale brown solid. m.p. 68–69 °C.  $^1\text{H}$  NMR (400 MHz,  $\text{CDCl}_3$ )  $\delta$  7.25–7.17 (m, 3H), 7.07 (td,  $J = 7.5$ , 1.4 Hz, 1H), 7.00–6.93 (m, 2H), 6.79 (dd,  $J = 7.3$ , 0.9 Hz, 1H), 6.72 (ddd,  $J = 10.6$ , 5.8, 2.1 Hz, 2H), 3.46 (dd,  $J = 7.7$ , 5.5 Hz, 1H), 2.89 (dd,  $J = 40.1$ , 13.2 Hz, 2H), 1.93–1.83 (m, 1H), 1.79–1.70 (m, 1H), 1.69–1.49 (m, 3H), 1.40–1.18 (m, 3H).  $^{13}\text{C}$  NMR (101 MHz,  $\text{CDCl}_3$ )  $\delta$  149.9, 138.5, 135.0, 131.1, 127.7, 127.4, 126.2, 123.7, 118.6, 110.8, 63.4, 48.6, 45.0, 32.0, 29.8, 22.1, 22.0. HPLC: the ee value was determined by HPLC analysis (Chiralcel OD, *i*-PrOH/Hexane = 1/99, 1.0 mL/min, 215 nm), retention time:  $t_{\text{major}} = 8.877$  min,  $t_{\text{minor}} = 9.953$  min, ee =

82.84%;  $[\alpha]_{\text{D}}^{20} = -56.4$  ( $c = 0.5$ , THF). HRMS (EI)  $m/z$   $[M + H]^+$  calculated for  $\text{C}_{19}\text{H}_{21}\text{N}$ : 264.1747, found 264.1742.

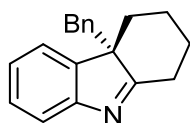

**(S)-4a-Benzyl-2,3,4,4a-tetrahydro-1H-carbazole (6e)**

It was prepared following the general procedure B and purified by silica gel flash chromatography using ethyl acetate/petroleum ether (1:9) as eluent to afford **6e** (12.6 mg, 48% yield). Brown oil.  $^1\text{H}$  NMR (500 MHz,  $\text{CDCl}_3$ )  $\delta$  7.48 (d,  $J = 7.7$  Hz, 1H), 7.28 (dd,  $J = 7.5, 1.2$  Hz, 1H), 7.15 (dd,  $J = 7.7, 7.1$  Hz, 1H), 7.10–7.05 (m, 4H), 6.77 (dd,  $J = 7.6, 1.7$  Hz, 2H), 3.23 (d,  $J = 13.5$  Hz, 1H), 3.00 (t,  $J = 12.1$  Hz, 2H), 2.78 (td,  $J = 13.3, 5.7$  Hz, 1H), 2.48 (dd,  $J = 13.5, 2.7$  Hz, 1H), 2.30 (ddd,  $J = 11.7, 5.0, 2.9$  Hz, 1H), 2.03 (dt,  $J = 13.8, 3.7$  Hz, 1H), 1.81–1.77 (m, 1H), 1.53–1.45 (m, 1H), 1.23–1.17 (m, 1H).  $^{13}\text{C}$  NMR (126 MHz,  $\text{CDCl}_3$ )  $\delta$  189.0, 154.6, 144.3, 136.2, 129.6, 128.0, 127.8, 126.8, 124.6, 122.9, 120.2, 58.9, 39.3, 37.3, 30.8, 29.4, 21.6. HPLC: the ee value was determined by HPLC analysis (Chiralcel OD, *i*-PrOH/Hexane = 3/97, 1.0 mL/min, 215 nm), retention time:  $t_{\text{minor}} = 17.190$  min,  $t_{\text{major}} = 13.483$  min, ee = 85.26%;  $[\alpha]_{\text{D}}^{20} = +43.2$  ( $c = 0.35$ , THF). HRMS (EI)  $m/z$   $[M + H]^+$  calculated for  $\text{C}_{19}\text{H}_{20}\text{N}$ : 262.1590, found 262.1576.

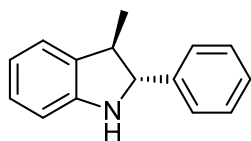

**(2R,3R)-3-Methyl-2-phenylindoline (5f)**

It was prepared following the general procedure B and purified by silica gel flash chromatography using ethyl acetate/petroleum ether (1:9) as eluent to afford **5f** (10.7 mg, 51% yield). Yellow solid. m.p. 41–43 °C.  $^1\text{H}$  NMR (400 MHz,  $\text{CDCl}_3$ )  $\delta$  7.57–7.52 (m, 2H), 7.45–7.33 (m, 3H), 7.18–7.08 (m, 2H), 6.84 (td,  $J = 7.4, 0.9$  Hz, 1H), 6.72 (d,  $J = 7.7$  Hz, 1H), 4.44 (d,  $J = 9.9$  Hz, 1H), 3.28–3.15 (m, 1H), 1.41 (d,  $J = 6.8$  Hz, 3H).  $^{13}\text{C}$  NMR (101 MHz,  $\text{CDCl}_3$ )  $\delta$  150.5, 143.5, 133.3, 128.7, 127.8, 127.8,

127.2, 123.4, 119.0, 109.1, 73.0, 46.6, 17.0. HPLC: the ee value was determined by HPLC analysis (Chiralcel OD, *i*-PrOH/Hexane = 20/80, 1.0 mL/min, 215 nm), retention time:  $t_{\text{major}} = 10.643$  min,  $t_{\text{minor}} = 7.530$  min, ee = 85.32%; HRMS (EI)  $m/z$   $[M + H]^+$  calculated for  $C_{15}H_{15}N$ : 210.1277, found 210.1285. The diastereomer was determined by comparing with reported data.<sup>[5]</sup>

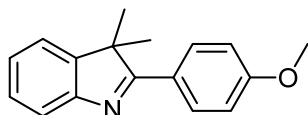

### 2-(4-Methoxyphenyl)-3,3-dimethyl-3H-indole (**2b**)

It was prepared following the general procedure B and purified by silica gel flash chromatography using ethyl acetate/petroleum ether (1:9) as eluent to afford **2b** (12.3 mg, 49% yield). Yellow solid.  $^1\text{H}$  NMR (500 MHz,  $\text{CDCl}_3$ )  $\delta$  8.24–8.15 (m, 2H), 7.73 (d,  $J = 7.7$  Hz, 1H), 7.41–7.31 (m, 2H), 7.25 (td,  $J = 7.4, 0.9$  Hz, 1H), 7.04–6.99 (m, 2H), 3.84 (s, 3H), 1.59 (s, 6H).  $^{13}\text{C}$  NMR (126 MHz,  $\text{CDCl}_3$ )  $\delta$  182.5, 161.5, 153.3, 147.5, 130.1, 127.7, 125.8, 125.4, 120.8, 120.4, 114.0, 55.3, 53.1, 25.0. HRMS (EI)  $m/z$   $[M + H]^+$  calculated for  $C_{17}H_{18}NO$ : 252.1383, found 252.1395.

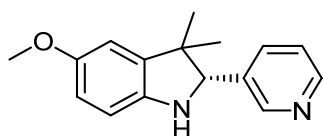

### (*R*)-5-Methoxy-3,3-dimethyl-2-(pyridin-3-yl)indoline (**8**)

It was prepared following the general procedure B and purified by silica gel flash chromatography using ethyl acetate/petroleum ether (1:9) as eluent to afford **8** (12.5 mg, 49% yield). Yellow oil.  $^1\text{H}$  NMR (500 MHz,  $\text{CDCl}_3$ )  $\delta$  7.38 (d,  $J = 8.5$  Hz, 2H), 6.90 (m, 4H), 6.64 (d,  $J = 7.7$  Hz, 1H), 4.53 (s, 1H), 3.83 (s, 3H), 2.31 (s, 3H), 1.40 (s, 3H), 0.74 (s, 3H).  $^{13}\text{C}$  NMR (126 MHz,  $\text{CDCl}_3$ )  $\delta$  159.2, 147.0, 138.7, 132.2, 128.7, 128.5, 127.8, 123.5, 113.6, 109.3, 74.5, 55.5, 45.4, 26.5, 24.6, 21.2. HPLC: the ee value was determined by HPLC analysis (Chiralcel IB, *i*-PrOH/Hexane = 20/80, 1.0 mL/min, 215 nm), retention time:  $t_{\text{major}} = 24.073$  min,  $t_{\text{minor}} = 13.037$  min, ee =

89.52%;  $[\alpha]_D^{20} = +11.62$  ( $c = 0.14$ ,  $\text{CH}_2\text{Cl}_2$ ). HRMS (EI)  $m/z$   $[\text{M} + \text{H}]^+$  calculated for  $\text{C}_{16}\text{H}_{19}\text{N}_2\text{O}$ : 255.1492, found 255.1497.

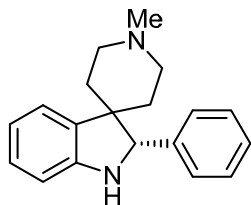

**(S)-1'-Methyl-2-phenylspiro[indoline-3,4'-piperidine] (10)**

It was prepared following the general procedure B and purified by silica gel flash chromatography using ethyl acetate/petroleum ether (2:1) as eluent to afford **10** (14.0 mg, 50% yield). Yellow oil.  $^1\text{H}$  NMR (500 MHz,  $\text{CDCl}_3$ )  $\delta$  7.31–7.26 (m, 6H), 7.11 (td,  $J = 7.6, 1.1$  Hz, 1H), 6.78 (td,  $J = 7.4, 0.8$  Hz, 1H), 6.69 (d,  $J = 7.7$  Hz, 1H), 4.61 (s, 1H), 4.12 (s, 1H), 2.87–2.80 (m, 1H), 2.69–2.62 (m, 1H), 2.55–2.48 (m, 1H), 2.35 (d,  $J = 4.4$  Hz, 3H), 2.12–2.05 (m, 2H), 2.01–1.94 (m, 1H), 1.84 (d,  $J = 8.4$  Hz, 1H), 1.48–1.41 (m, 1H).  $^{13}\text{C}$  NMR (126 MHz,  $\text{CDCl}_3$ )  $\delta$  150.4, 140.9, 135.8, 128.5, 128.1, 128.0, 124.4, 118.8, 108.9, 72.5, 52.7, 52.4, 46.8, 46.4, 36.8, 31.2. HPLC: the ee value was determined by HPLC analysis (Chiralcel OD, *i*-PrOH/Hexane = 20/80, 1.0 mL/min, 215 nm), retention time:  $t_{\text{major}} = 14.353$  min,  $t_{\text{minor}} = 10.413$  min, ee = 82.14%; HRMS (EI)  $m/z$   $[\text{M} + \text{H}]^+$  calculated for  $\text{C}_{19}\text{H}_{23}\text{N}_2$ : 279.1856, found 279.1859.

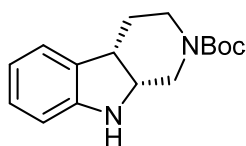

**Tert-butyl**

**(4aS,9aR)-1,3,4,4a,9,9a-hexahydro-2H-pyrido[3,4-b]indole-2-carboxylate (5g)**

It was prepared following the general procedure B and purified by silica gel flash chromatography using ethyl acetate/petroleum ether (1:1) as eluent to afford **5g** (12.9 mg, 46% yield). Yellow oil.  $^1\text{H}$  NMR (500 MHz,  $\text{CDCl}_3$ )  $\delta$  7.04 (dd,  $J = 16.5, 8.2$  Hz, 2H), 6.73 (t,  $J = 6.9$  Hz, 1H), 6.62 (d,  $J = 7.7$  Hz, 1H), 3.95 (s, 1H), 3.56–3.27 (m, 5H), 2.06–1.95 (m, 1H), 1.86 (s, 1H), 1.44 (s, 9H).  $^{13}\text{C}$  NMR (126 MHz,  $\text{CDCl}_3$ )  $\delta$

155.8, 150.8, 131.2, 127.9, 123.8, 118.9, 109.8, 79.6, 57.6, 43.7, 41.4, 39.4, 28.6, 26.3. HPLC: the ee value was determined by HPLC analysis (Chiralcel IA, *i*-PrOH/Hexane = 1/99, 1.0 mL/min, 254 nm), retention time:  $t_{\text{major}} = 53.723$  min,  $t_{\text{minor}} = 73.427$  min, ee = 73.04%; HRMS (EI)  $m/z$   $[M + H]^+$  calculated for  $C_{16}H_{23}N_2O_2$ : 275.1754, found 275.1747. The diastereomer and absolute configuration was determined by comparing with reported data.<sup>[9]</sup>

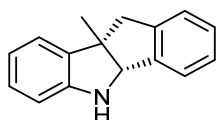

**(4bR,9bS)-9b-Methyl-4b,5,9b,10-tetrahydroindeno[1,2-b]indole (11)**

It was prepared following the general procedure B and purified by silica gel flash chromatography using ethyl acetate/petroleum ether (2:1) as eluent to afford **11** (10.9 mg, 49% yield). Colorless oil.  $^1\text{H}$  NMR (500 MHz,  $\text{CDCl}_3$ )  $\delta$  7.31 (d,  $J = 6.6$  Hz, 1H), 7.23–7.13 (m, 4H), 7.00 (td,  $J = 7.6, 1.2$  Hz, 1H), 6.75 (td,  $J = 7.4, 0.8$  Hz, 1H), 6.61 (d,  $J = 7.8$  Hz, 1H), 4.81 (s, 1H), 4.28 (brs, 1H), 3.39 (d,  $J = 16.2$  Hz, 1H), 3.20 (d,  $J = 16.2$  Hz, 1H), 1.55 (s, 3H).  $^{13}\text{C}$  NMR (126 MHz,  $\text{CDCl}_3$ )  $\delta$  149.4, 144.5, 142.8, 137.6, 128.2, 128.0, 127.3, 125.1, 124.2, 123.3, 119.6, 110.6, 74.7, 53.8, 47.0, 27.0. HPLC: the ee value was determined by HPLC analysis (Chiralcel OD, *i*-PrOH/Hexane = 10/90, 1.0 mL/min, 254 nm), retention time:  $t_{\text{major}} = 8.497$  min,  $t_{\text{minor}} = 7.223$  min, ee = 89.48%;  $[\alpha]_D^{20} = -1.6$  ( $c = 0.08$ ,  $\text{CHCl}_3$ ). HRMS (EI)  $m/z$   $[M + H]^+$  calculated for  $C_{16}H_{16}N$ : 222.1277, found 222.1269. The diastereomer was determined by comparing with reported data.<sup>[8]</sup>

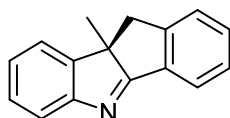

**(R)-9b-Methyl-9b,10-dihydroindeno[1,2-b]indole (12)**

It was prepared following the general procedure B and purified by silica gel flash chromatography using ethyl acetate/petroleum ether (2:1) as eluent to afford **12** (10.1 mg, 46% yield). Yellow oil.  $^1\text{H}$  NMR (500 MHz,  $\text{CDCl}_3$ )  $\delta$  7.91 (d,  $J = 5.1$  Hz, 1H), 7.65 (d,  $J = 7.7$  Hz, 1H), 7.46–7.40 (m, 4H), 7.38–7.33 (m, 1H), 7.21 (t,  $J = 7.4$  Hz,

1H), 3.12 (d,  $J = 14.5$  Hz, 1H), 2.85 (d,  $J = 14.6$  Hz, 1H), 1.40 (s, 3H).  $^{13}\text{C}$  NMR (126 MHz,  $\text{CDCl}_3$ )  $\delta$  196.4, 153.6, 144.3, 131.2, 128.4, 128.1, 127.2, 125.3, 124.0, 123.2, 121.6, 64.0, 39.0, 26.9. HPLC: the ee value was determined by HPLC analysis (Chiralcel OJ, *i*-PrOH/Hexane = 5/95, 1.0 mL/min, 311 nm), retention time:  $t_{\text{major}} = 28.283$  min,  $t_{\text{minor}} = 24.640$  min, ee = 85.70%;  $[\alpha]_{\text{D}}^{20} = +17.6$  (c = 0.10,  $\text{CHCl}_3$ ). HRMS (EI)  $m/z$   $[\text{M} + \text{H}]^+$  calculated for  $\text{C}_{16}\text{H}_{14}\text{N}$ : 220.1121, found 220.1127.

## Mechanism studies

### Kinetic isotope effect experiment

#### Scheme S4. Preparation of [D]-1a

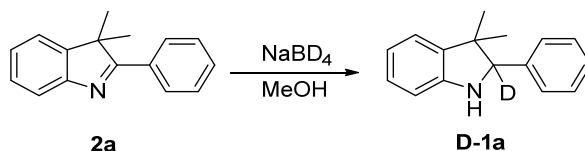

[D]-1a was prepared through the reduction of **2a** by NaBD<sub>4</sub>. In a 100 mL round bottom flask, **2a** was dissolved in MeOH (0.2 M) and the reaction mixture was cooled to 0 °C. NaBD<sub>4</sub> (1.2 equiv) was added and the reaction mixture was allowed to warm to room temperature and stirred 5 h. The reaction mixture was concentrated by rotary evaporation under reduced pressure partitioned between DCM and water (20 mL each). The organic layer was removed and the aqueous layer extracted with DCM (2 x 20 mL). The combined organic layers were dried with MgSO<sub>4</sub>, filtered, concentrated and purified by flash column chromatography, furnishing [D]-1a containing 6% of non-deuterated **1a**. The analytical data was as follows: <sup>1</sup>H NMR (500 MHz, CDCl<sub>3</sub>) δ 7.54–7.46 (m, 2H), 7.43–7.33 (m, 3H), 7.16–7.09 (m, 2H), 6.84 (td, *J* = 7.4, 0.9 Hz, 1H), 6.76 (d, *J* = 7.7 Hz, 1H), 1.48 (s, 3H), 0.79 (s, 3H); <sup>13</sup>C NMR (126 MHz, CDCl<sub>3</sub>) δ 149.5, 140.1, 138.2, 128.3, 127.7, 127.6, 127.6, 122.7, 119.2, 109.4, 74.2 (t, *J* = 21.2 Hz), 45.4, 26.7, 24.7.

The kinetic isotope effect experiment was conducted at 0.05 mmol scale following the general procedure using a mixture of **H-1a** and **D-1a** (11.2 mg, 44% D). It was stirred at -40 °C for 1 h and purified by silica gel flash chromatography (7 mg, 62.5% yield). The ratio of **H-1a** and **D-1a** was determined by <sup>1</sup>H NMR which shows 54% of the remaining product was **D-1a**. The KIE was calculated as follows:

$$\text{KIE} = \frac{K_H}{K_D} = \frac{\frac{C_{H0} - C_{Ht}}{t}}{\frac{C_{D0} - C_{Dt}}{t}} = \frac{C_{H0} - C_{Ht}}{C_{D0} - C_{Dt}} = \frac{\frac{m_{H0} - m_{Ht}}{V}}{\frac{m_{D0} - m_{Dt}}{V}} = \frac{m_{H0} - m_{Ht}}{m_{D0} - m_{Dt}} = \frac{11.2 \times 0.56 - 7 \times 0.46}{11.2 \times 0.44 - 7 \times 0.54} = 2.7$$

S32



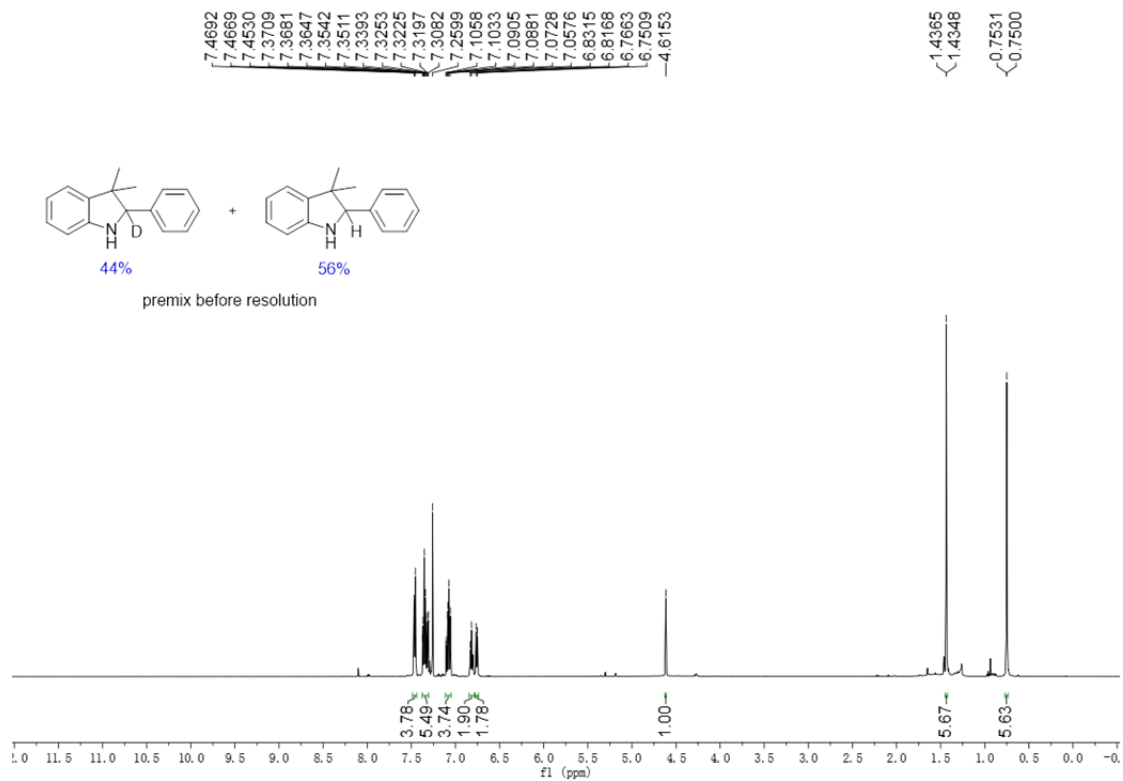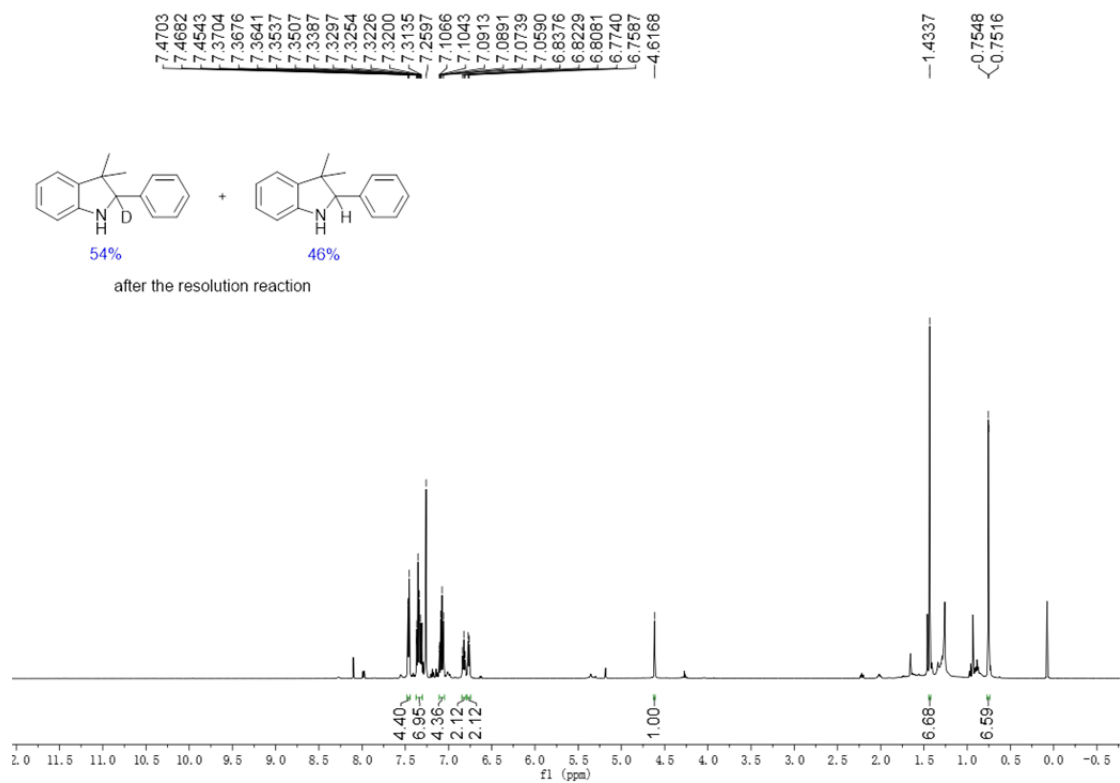

### Correlation of the enantiomeric excess of $C_{\text{mono}}8$ and **1a** with sodium 6-methoxy-2-naphthoate additive

The  $\text{CH}_2\text{Cl}_2$  solutions of  $C_{\text{mono}}8$  and ent- $C_{\text{mono}}8$  (0.005 M, respectively) were prepared and mixed to regulate each (0% ee, 20% ee, 40% ee, 60% ee, 80% ee and 100% ee, 0.005 M, respectively) complex solution in an appropriate manner. To the solutions at  $-40\text{ }^\circ\text{C}$ , **1a** (0.1 mmol, 22.3 mg) and sodium 6-methoxy-2-naphthoate (0.01 mmol, 2.2 mg, 10 mmol%) was added. Then 30% aqueous hydrogen peroxide (0.1 mmol, 10  $\mu\text{L}$ ) were added as 4 portions in 2-hours intervals. After stirring for 8 h at this temperature, the reaction mixture was diluted with  $\text{CH}_2\text{Cl}_2$  (20 mL) at 50% conversion of **1a**, washed with water (10 mL), dried over  $\text{MgSO}_4$ , filtered and concentrated. The residue was purified by silica gel flash chromatography using EtOAc/petroleum ether (10:90) as eluent. The ee values of **1a** were determined by HPLC analysis on chiral phase column (Chiralpak IB-H, *i*-PrOH/Hexane = 20/80, 1.0 mL/min, 296 nm). A negative nonlinear effect was observed.

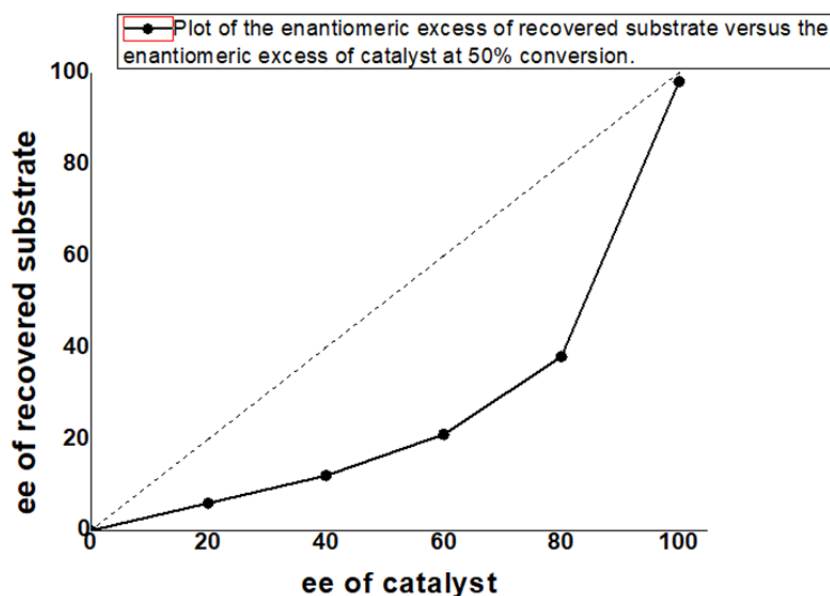

**Figure S1.** Plot of the ee of recovered **1a** versus the ee of  $C_{\text{mono}}8$  at 50% conversion.

The dotted line symbolizes the linear correlation.

### Correlation of the enantiomeric excess of $C_{\text{mono}}\mathbf{8}$ and $\mathbf{1a}$ without sodium 6-methoxy-2-naphthoate additive

The  $\text{CH}_2\text{Cl}_2$  solutions of  $C_{\text{mono}}\mathbf{8}$  and  $\text{ent-}C_{\text{mono}}\mathbf{8}$  (0.005 M, respectively) were prepared and mixed to regulate each (0% ee, 20% ee, 40% ee, 60% ee, 80% ee and 100% ee, 0.005 M, respectively) complex solution in an appropriate manner. To the solutions at  $-40\text{ }^\circ\text{C}$ ,  $\mathbf{1a}$  (0.1 mmol, 22.3 mg) was added. Then 30% aqueous hydrogen peroxide (0.1 mmol, 10  $\mu\text{L}$ ) were added as 4 portions in 2-hours intervals. After stirring for 8 h at this temperature, the reaction mixture was diluted with  $\text{CH}_2\text{Cl}_2$  (20 mL) at 50% conversion of  $\mathbf{1a}$ , washed with water (10 mL), dried over  $\text{MgSO}_4$ , filtered and concentrated. The residue was purified by silica gel flash chromatography using EtOAc/petroleum ether (10:90) as eluent. The ee values of  $\mathbf{1a}$  were determined by HPLC analysis on chiral phase column (Chiralpak IB-H, *i*-PrOH/Hexane = 20/80, 1.0 mL/min, 296 nm). An approximate linear effect was observed.

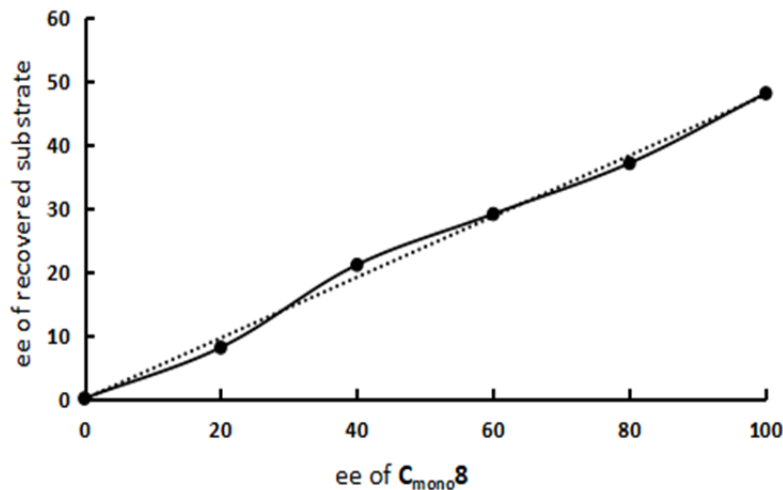

**Figure S2.** Plot of the ee of recovered  $\mathbf{1a}$  versus the ee of  $C_{\text{mono}}\mathbf{8}$  at 50% conversion without additive. The dotted line symbolizes the linear correlation.

**Hammett plot for the competitive dehydrogenation experiments of substrates with a series of *p*-substituents (X) on  $\alpha$ -aryl groups**

To a solution of a mixture two different *p*-substituted **1** (**1a** and **1b**; **1a** and **1d**; **1a** and **1f**; **1a** and **1i**; **1a** and **1n**; 0.1 mmol each) in CHCl<sub>3</sub> (1.0 mL), **C<sub>mono</sub>8** (0.005 mmol, 3.7 mg, 5 mmol%) and sodium 6-methoxy-2-naphthoate (0.01 mmol, 2.2 mg, 10 mmol%) was added at -40 °C. Then 30% aqueous hydrogen peroxide (0.1 mmol, 10  $\mu$ L, 1.0 eq) was added as 4 portions in 4-hours intervals and the reaction was quenched with water (10 mL) at 15-35% conversion and the mixture was extracted with CH<sub>2</sub>Cl<sub>2</sub> (20 mL). The solvent was removed and the residue was purified by silica gel chromatography to give the desired product. The results were summarized as follows:.

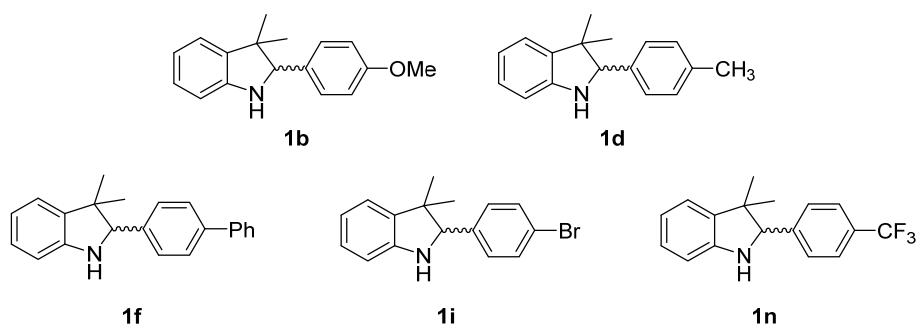

| entry | <i>p</i> -substituted X | $\log(k_X/k_H)^a$ | $\sigma^b$ | $\sigma^{+b}$ |
|-------|-------------------------|-------------------|------------|---------------|
| 1     | OCH <sub>3</sub>        | 0.385             | -0.27      | -0.78         |
| 2     | CH <sub>3</sub>         | 0.057             | -0.14      | -0.31         |
| 3     | Ph                      | -0.042            | 0.05       | -0.18         |
| 4     | Br                      | -0.332            | 0.26       | 0.15          |
| 5     | CF <sub>3</sub>         | -0.943            | 0.53       |               |

<sup>a</sup> Average of three experiments at 15-35% conversion.

<sup>b</sup> Data from: Anslyn, E. V.; Dougherty, D. A. (2006). *Modern Physical Organic Chemistry*, University science books.

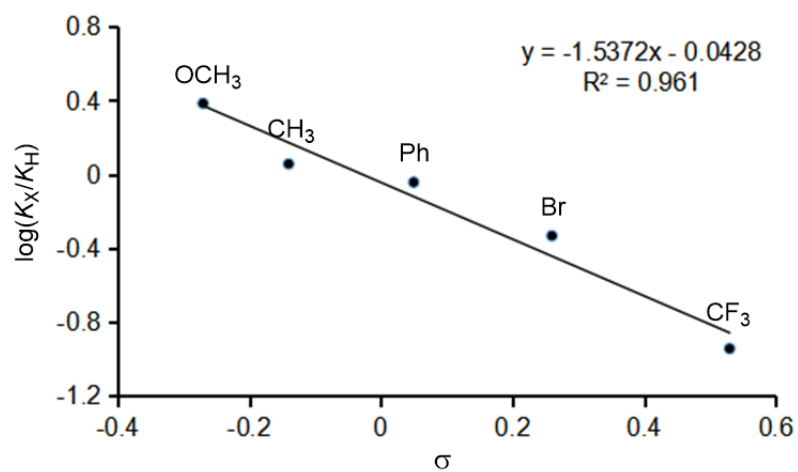

**Figure S3.** Hammett Plot of  $\log(k_X/k_H)$  vs.  $\sigma$  for the competition experiments.

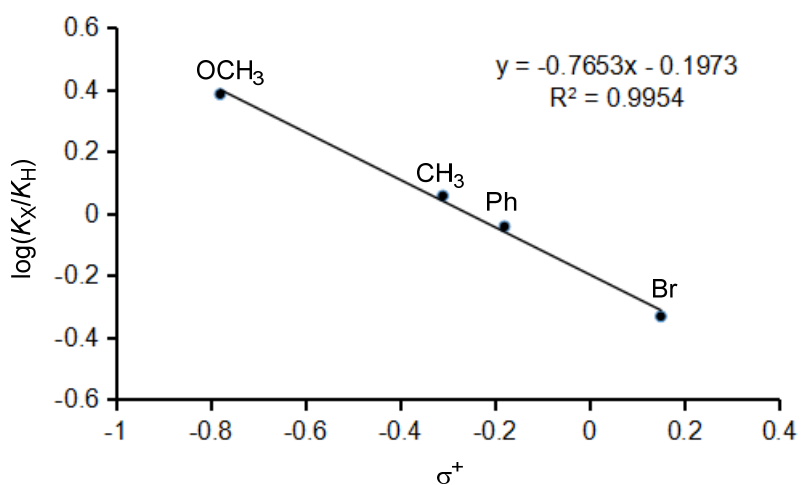

**Figure S4.** Hammett Plot of  $\log(k_X/k_H)$  vs.  $\sigma^+$  for the competition experiments

## Control experiments

### The oxidation reactivity of stoichiometric C8 without H<sub>2</sub>O<sub>2</sub>

#### Scheme S5. Control experiment using stoichiometric C8 without H<sub>2</sub>O<sub>2</sub>

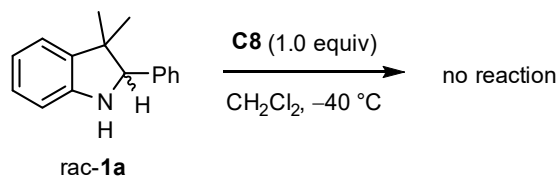

To a solution of **rac-1a** (0.05 mmol, 11.2 mg) in  $\text{CH}_2\text{Cl}_2$  (0.5 mL) was added **C8** (0.05 mmol, 77 mg) at  $-40\text{ }^\circ\text{C}$ . The mixture was vigorously stirred for 12 h. No reaction occurred.

### Resonance Raman spectroscopy

Resonance Raman spectra were measured with glass capillary tubes containing the complexes, maintained at room temperature, using a LabRAM HR Evolution raman spectrometer (HORIBA Scientific). An Helium-neon gas laser at 633 nm was utilized as an excitation source. The laser power at the sample was about 5 mW and the acquisition time was 15 s.

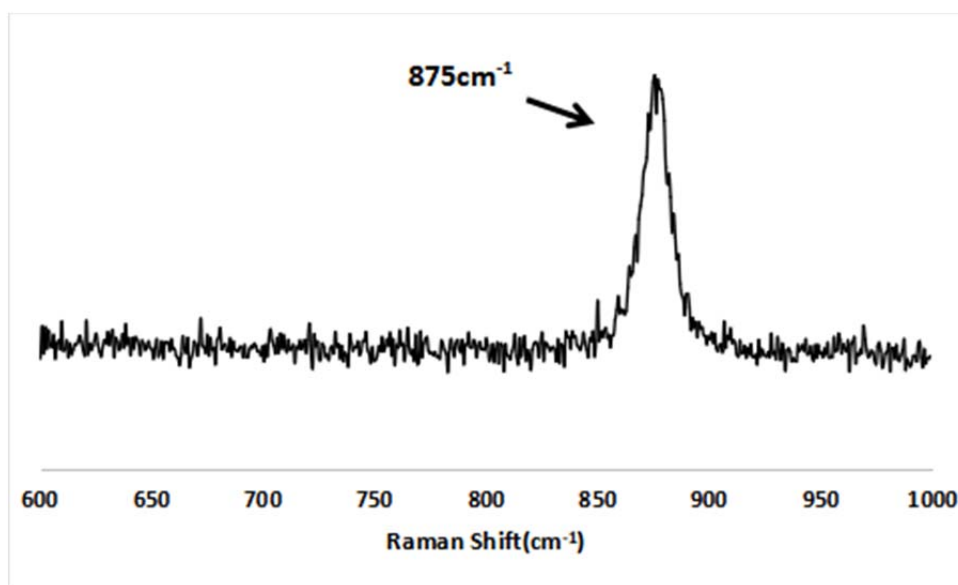

**Figure S5.** Raman spectrum of  $\text{H}_2\text{O}_2$

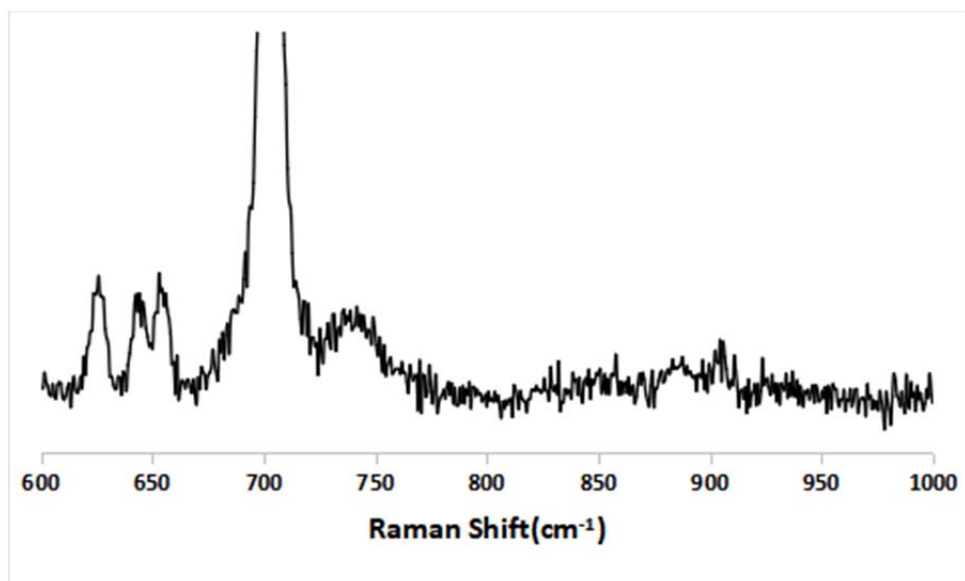

**Figure S6.** Raman spectrum of C8 without H<sub>2</sub>O<sub>2</sub>

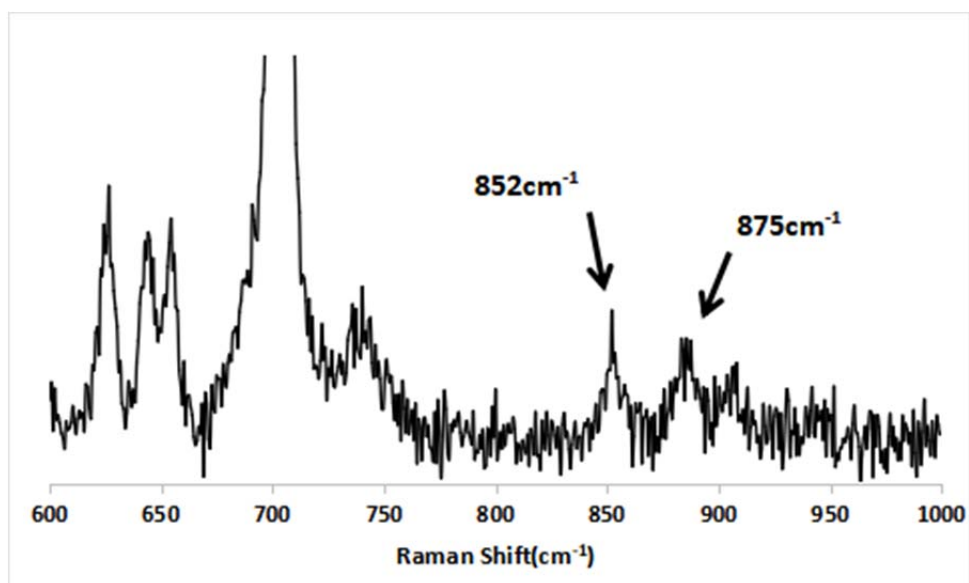

**Figure S7.** Raman spectrum of C8 combining with 10 equiv of H<sub>2</sub>O<sub>2</sub>

## ESI-MS analysis

ESI-MS analysis was conducted to confirm the structure of **C9** and **13**. The isotope distribution patterns were calculated by EnviPat Web 2.4 site to compare the pattern and profile of the  $m/z$  peak(s) to the found ones. For complex **C9**, ESI-MS  $m/z$   $[M - OH]^+$  calculated for  $C_{92}H_{69}F_8Fe_2N_4O_7$ : 1605.37, found 1605.37;  $m/z$   $[M - H]^+$  calculated for  $C_{92}H_{69}F_8Fe_2N_4O_8$ : 1621.37, found 1621.33. For complex **13**, ESI-MS  $m/z$   $[M + H]^+$  calculated for  $C_{87}H_{69}F_8Fe_2N_4O_8$ : 1561.37, found 1561.36; The isotope distribution patterns of **C9** and **13** are identical to the calculated ones.

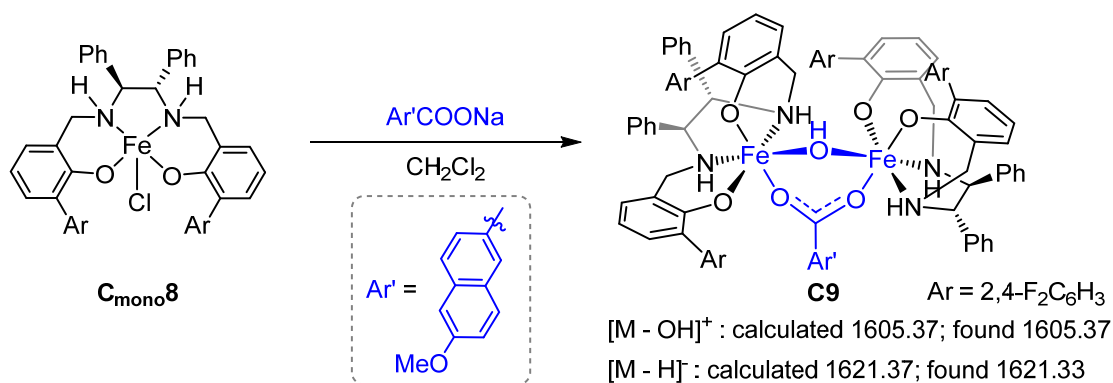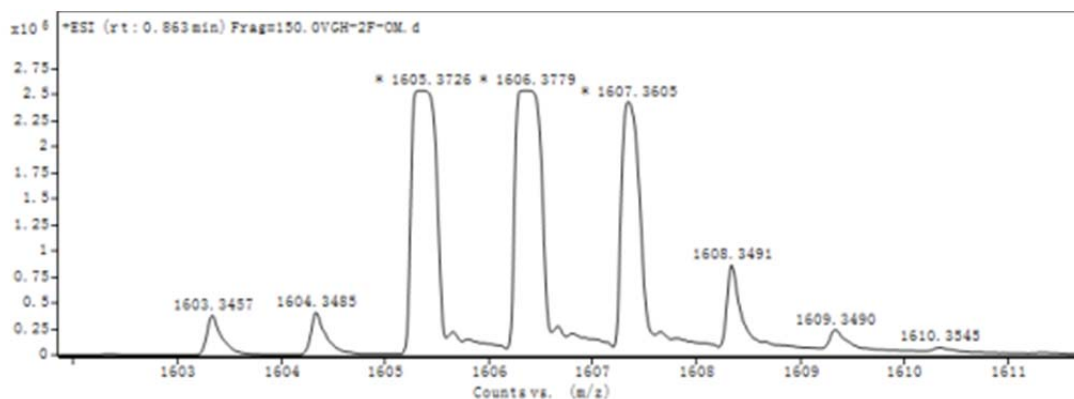

ESI-MS  $[M - OH]^+$  for **C9**



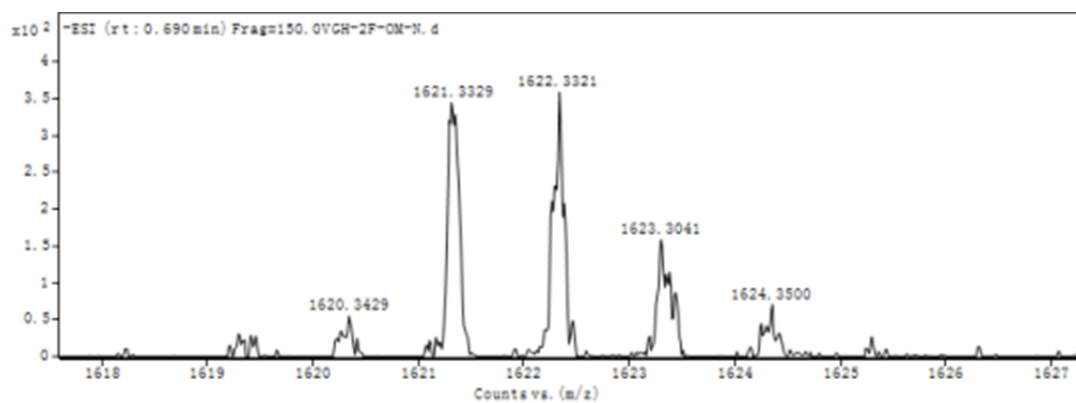

ESI-MS  $[M - H]^-$  for **C9**

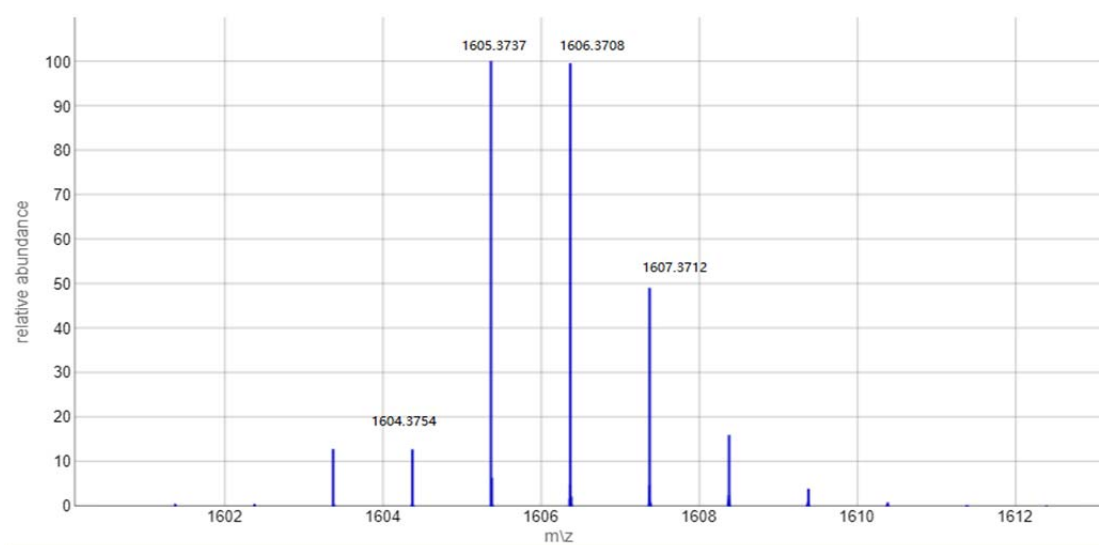

Simulation of ESI-MS  $[M - OH]^+$  for **C9**

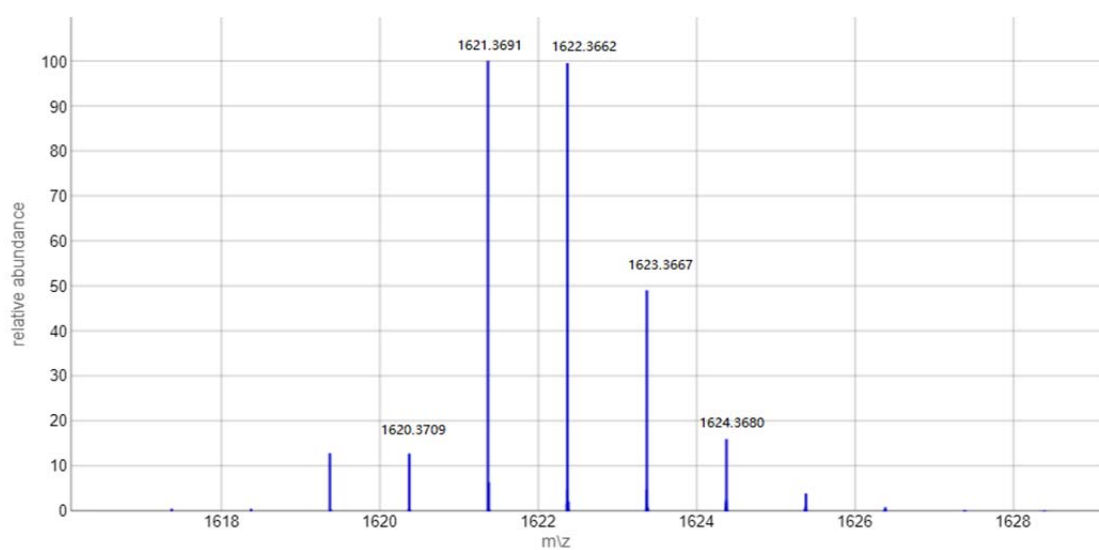

Simulation of ESI-MS  $[M - H]^-$  for **C9**

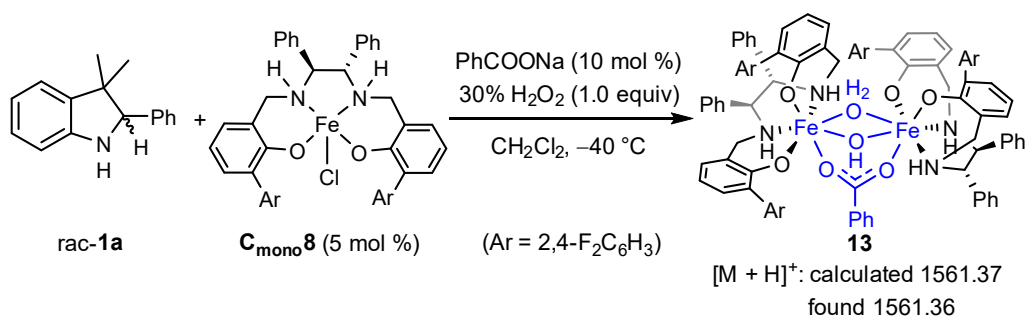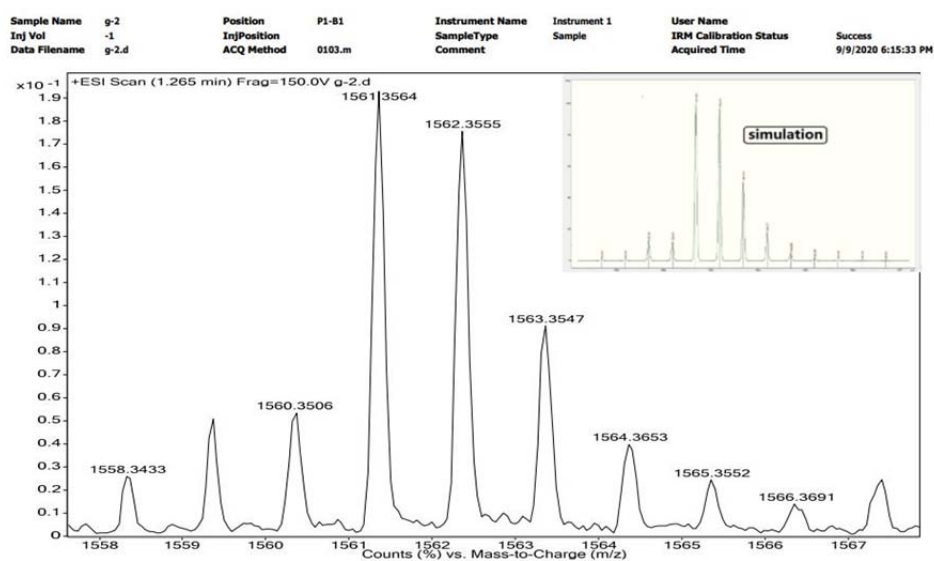

ESI-MS [M + H]<sup>+</sup> for **13**

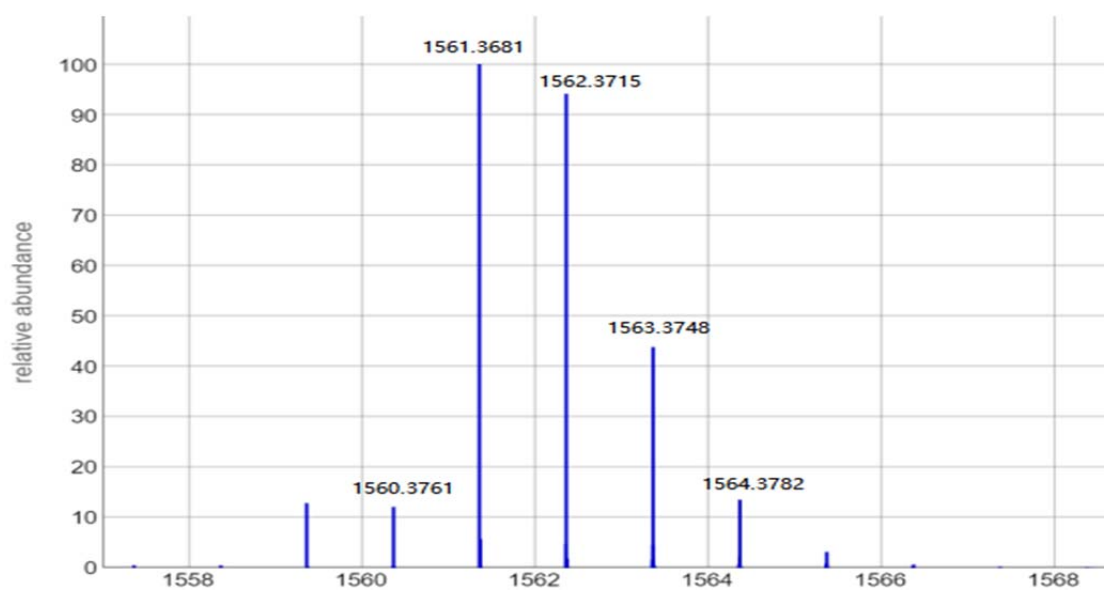

Simulation of ESI-MS [M + H]<sup>+</sup> for **13**

## Influence of various additives on selectivity

**Table S2. The effect of different aryl carboxylic acid derivatives<sup>a</sup>**

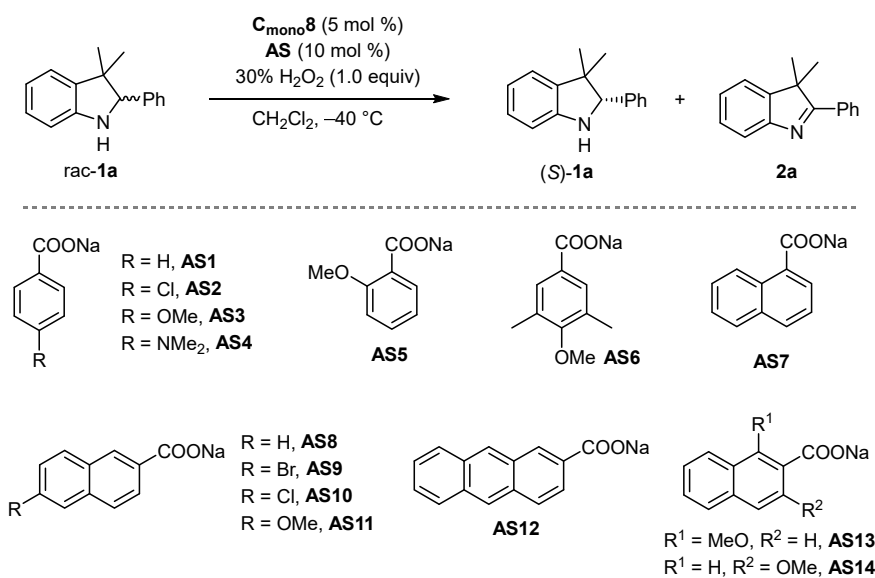

| entry | acid derivative | conv. (%) <sup>b</sup> | ee (%) <sup>c</sup> | s <sup>d</sup> |
|-------|-----------------|------------------------|---------------------|----------------|
| 1     | <b>AS1</b>      | 49                     | 71                  | 14             |
| 2     | <b>AS2</b>      | 52                     | 61                  | 8.3            |
| 3     | <b>AS3</b>      | 53                     | 83                  | 17             |
| 4     | <b>AS4</b>      | 51                     | 82                  | 21             |
| 5     | <b>AS5</b>      | 52                     | 67                  | 8.3            |
| 6     | <b>AS6</b>      | 50                     | 65                  | 9.1            |
| 7     | <b>AS7</b>      | 47                     | 49                  | 5.5            |
| 8     | <b>AS8</b>      | 50                     | 87                  | 41             |
| 9     | <b>AS9</b>      | 51                     | 94                  | 70             |
| 10    | <b>AS10</b>     | 52                     | 85                  | 22             |
| 11    | <b>AS11</b>     | 50                     | 94                  | 115            |
| 12    | <b>AS12</b>     | 50                     | 70                  | 12             |
| 13    | <b>AS13</b>     | 53                     | 95                  | 43             |
| 14    | <b>AS14</b>     | 49                     | 67                  | 11             |

<sup>a</sup>Reaction condition: to rac-**1a** (0.1 mmol), monoiron **C<sub>mono</sub>8** (5 mol%) and carboxylic acid derivative (10 mol %) in CH<sub>2</sub>Cl<sub>2</sub> (1.0 mL) at -40 °C was added 30% aqueous H<sub>2</sub>O<sub>2</sub> (0.1 mmol) as four portions in 2 h intervals for 6 h, and the mixture was stirred at -40 °C for 18-24 h, unless otherwise noted. <sup>b</sup>Conversion was calculated from the isolated yield of recovered (S)-**1a**. <sup>c</sup>Determined by HPLC analysis on a chiral stationary phase. <sup>d</sup>Selectivity (s) values were calculated through the equation  $s = \ln[(1 - C)(1 - ee)] / \ln[(1 - C)(1 + ee)]$ .

The effect of aryl carboxylic acid derivatives on the selectivity are systematically examined (Table S2). We found that the selectivity was highly dependent on the nature and the position of the substituents on the aryl ring of the additive. In general, aryl carboxylic acids bearing an electron-withdrawing group show inferior selectivity to those with electron-donating ones (e.g. entries 1-4; entries 8-11, Table S2). The observation suggested that the chelating properties of carboxylic acid moiety are essential to selectivity. The selectivity was also sensitive to the position of the substituents on the arene ring of the additive. While no obvious trend on the substituent pattern was concluded, the obvious variation on the selectivity implied that the substituent pattern on the arene ring might influence the chiral environment around the diiron through modulating the 2-benzoate-bridge.

## X-ray crystallographic data

Single crystals of **C2** and **C8** were prepared as follows:

**C<sub>mono</sub>2** or **C<sub>mono</sub>8** (0.05 mmol, 1.0 equiv) were dissolved in a mixture of CH<sub>2</sub>Cl<sub>2</sub>-EtOH-acetone-H<sub>2</sub>O (3 mL/ 3 mL/3 mL/ 1 drop) solution and sodium benzoate (20 equiv) was added. The mixture was maintained open-flask at room temperature for several days until the crystal formed.

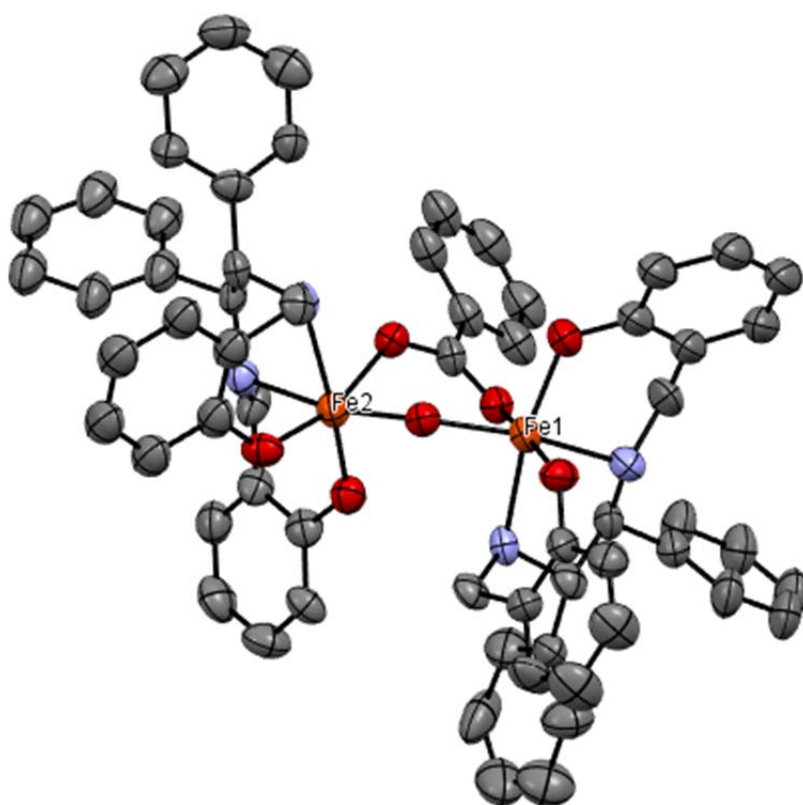

**Figure S8.** Molecular structure of complex **C2** ( CCDC 2127388)

Crystal data and structure refinement for mo\_211115G\_2\_0m.

|                                             |                                                                               |
|---------------------------------------------|-------------------------------------------------------------------------------|
| Identification code                         | mo_211115G_2_0m                                                               |
| Empirical formula                           | C <sub>67</sub> H <sub>69</sub> Fe <sub>2</sub> N <sub>4</sub> O <sub>9</sub> |
| Formula weight                              | 1185.96                                                                       |
| Temperature/K                               | 173.0                                                                         |
| Crystal system                              | orthorhombic                                                                  |
| Space group                                 | P2 <sub>1</sub> 2 <sub>1</sub> 2 <sub>1</sub>                                 |
| a/Å                                         | 11.486(2)                                                                     |
| b/Å                                         | 19.300(3)                                                                     |
| c/Å                                         | 28.572(5)                                                                     |
| α/°                                         | 90                                                                            |
| β/°                                         | 90                                                                            |
| γ/°                                         | 90                                                                            |
| Volume/Å <sup>3</sup>                       | 6334(2)                                                                       |
| Z                                           | 4                                                                             |
| ρ <sub>cal</sub> /g/cm <sup>3</sup>         | 1.244                                                                         |
| μ/mm <sup>-1</sup>                          | 0.516                                                                         |
| F(000)                                      | 2492.0                                                                        |
| Crystal size/mm <sup>3</sup>                | 0.15 × 0.02 × 0.02                                                            |
| Radiation                                   | MoKα (λ = 0.71073)                                                            |
| 2θ range for data collection/°              | 3.822 to 52.878                                                               |
| Index ranges                                | -14 ≤ h ≤ 14, -24 ≤ k ≤ 19, -32 ≤ l ≤ 35                                      |
| Reflections collected                       | 29957                                                                         |
| Independent reflections                     | 12758 [R <sub>int</sub> = 0.1522, R <sub>sigma</sub> = 0.1959]                |
| Data/restraints/parameters                  | 12758/192/743                                                                 |
| Goodness-of-fit on F <sup>2</sup>           | 0.949                                                                         |
| Final R indexes [I ≥ 2σ (I)]                | R <sub>1</sub> = 0.0857, wR <sub>2</sub> = 0.2026                             |
| Final R indexes [all data]                  | R <sub>1</sub> = 0.1757, wR <sub>2</sub> = 0.2616                             |
| Largest diff. peak/hole / e Å <sup>-3</sup> | 0.67/-0.77                                                                    |
| Flack parameter                             | 0.07(3)                                                                       |

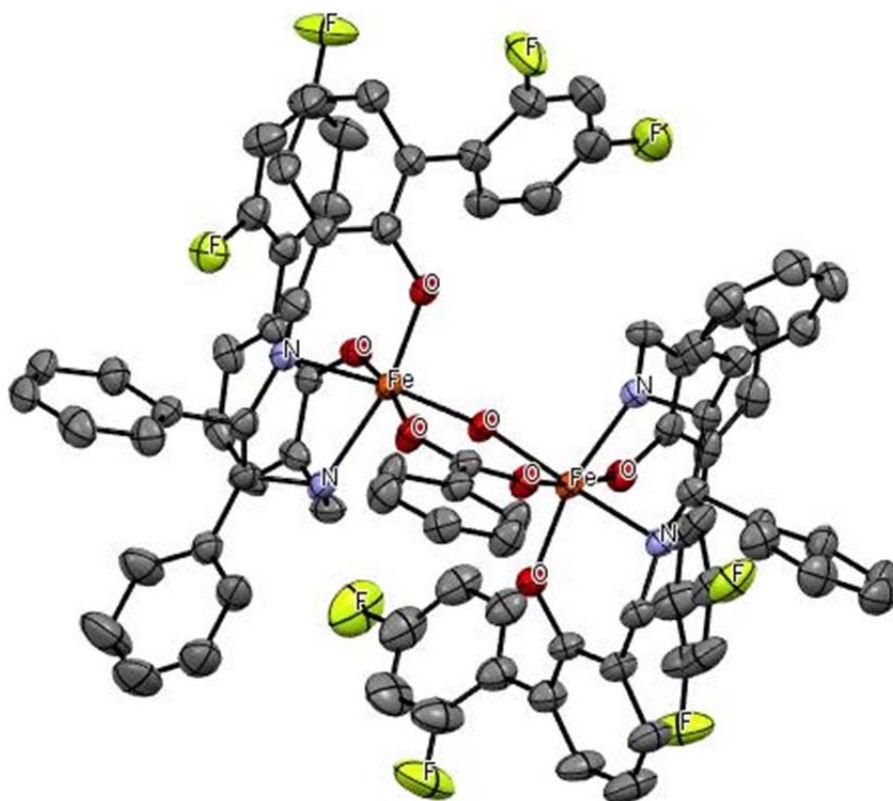

**Figure S9.** Molecular structure of complex **C8** ( CCDC 2127389)

|                                         |                                                                                                                  |
|-----------------------------------------|------------------------------------------------------------------------------------------------------------------|
| Compound                                | 200828c                                                                                                          |
| Formula                                 | C <sub>180</sub> H <sub>148</sub> Cl <sub>4</sub> F <sub>16</sub> Fe <sub>4</sub> N <sub>8</sub> O <sub>16</sub> |
| D <sub>calc.</sub> / g cm <sup>-3</sup> | 1.392                                                                                                            |
| μ/mm <sup>-1</sup>                      | 4.193                                                                                                            |
| Formula Weight                          | 3348.26                                                                                                          |
| Colour                                  | clear light black                                                                                                |
| Shape                                   | block                                                                                                            |
| Size/mm <sup>3</sup>                    | 0.03 × 0.02 × 0.01                                                                                               |
| T/K                                     | 173.00(10)                                                                                                       |
| Crystal System                          | orthorhombic                                                                                                     |
| Flack Parameter                         | -0.009(2)                                                                                                        |
| Hooft Parameter                         | -0.0065(17)                                                                                                      |
| Space Group                             | P2 <sub>1</sub> 2 <sub>1</sub> 2 <sub>1</sub>                                                                    |
| a/Å                                     | 15.2213(3)                                                                                                       |
| b/Å                                     | 21.4654(5)                                                                                                       |
| c/Å                                     | 24.4451(4)                                                                                                       |
| α/°                                     | 90                                                                                                               |
| β/°                                     | 90                                                                                                               |
| γ/°                                     | 90                                                                                                               |
| V/Å <sup>3</sup>                        | 7987.0(3)                                                                                                        |
| Z                                       | 2                                                                                                                |
| Z'                                      | 0.5                                                                                                              |
| Wavelength/?                            | 1.54184                                                                                                          |
| Radiation type                          | Cu Kα                                                                                                            |
| Θ <sub>min</sub> /°                     | 2.740                                                                                                            |
| Θ <sub>max</sub> /°                     | 67.079                                                                                                           |
| Measured Refl.                          | 27176                                                                                                            |
| Independent Refl.                       | 13233                                                                                                            |
| Reflections with I > 2(I)               | 11427                                                                                                            |
| R <sub>int</sub>                        | 0.0407                                                                                                           |
| Parameters                              | 1029                                                                                                             |
| Restraints                              | 0                                                                                                                |
| Largest Peak                            | 0.433                                                                                                            |
| Deepest Hole                            | -0.819                                                                                                           |
| GooF                                    | 1.041                                                                                                            |
| wR <sub>2</sub> (all data)              | 0.1538                                                                                                           |
| wR <sub>2</sub>                         | 0.1454                                                                                                           |
| R <sub>1</sub> (all data)               | 0.0667                                                                                                           |
| R <sub>1</sub>                          | 0.0555                                                                                                           |



## Selected key features in the crystal structures

X-ray diffraction studies revealed that complex **C2** and **C8** were dinuclear complexes mimicking the structure of the  $\mu$ -hydroxo, carboxylate bridged non-heme diiron(III) core in the active site of MMO. A comparison of the molecular structures of complexes **C2**, **C8** and MMO based on their X-ray crystallographic data was shown here.

The Fe–Fe distances in MMO, **C2**, and **C8** are 3.1 Å, 3.54 Å, and 3.74 Å, respectively. **C8** containing a bulkier salan basal ligand exhibits a longer Fe–Fe bond than **C2**, suggesting that varying the substituent on the basal salan ligand leads to an obvious change of the Fe–Fe bond length. Based on the selectivity difference of complex **C2** and **C8**, we presumed that the Fe–Fe bond distance in chiral diiron(III) dimer complexes might be crucial to the enantioselectivity.

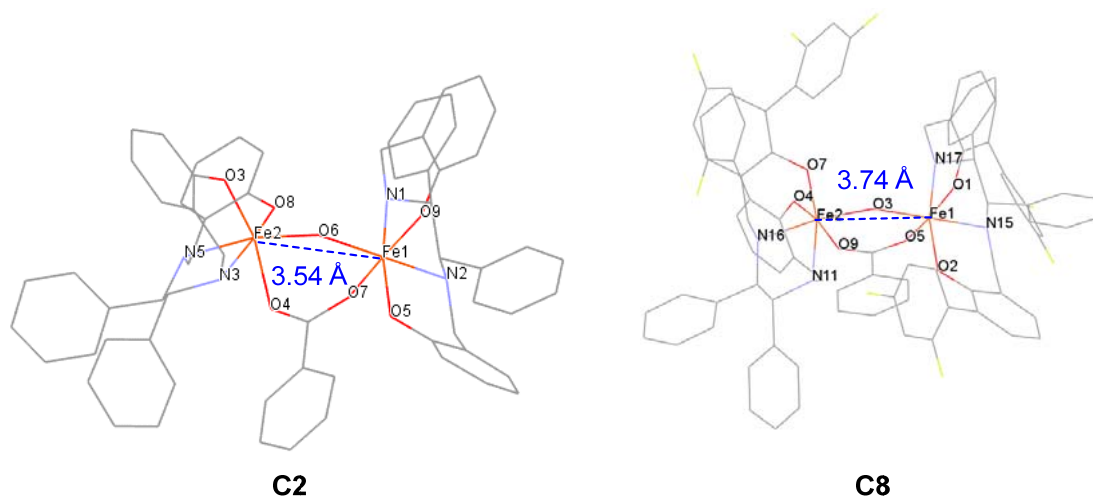

**Figure S10.** Stick figure of the X-ray crystal structure of **C2** and **C8**

**Table S3. Selected bond distances (Å) of C2 and C8:**

| C2 Bond distances |                   | C8 Bond distances |                   |
|-------------------|-------------------|-------------------|-------------------|
| Atom-Atom         | Bond distance (Å) | Atom-Atom         | Bond distance (Å) |
| Fe(1)-Fe(2)       | 3.54              | Fe(1)-Fe(2)       | 3.74              |
| Fe(1)-O(5)        | 1.91              | Fe(1)-O(2)        | 1.93              |
| Fe(1)-O(7)        | 1.96              | Fe(1)-O(5)        | 1.91              |
| Fe(1)-O(6)        | 2.12              | Fe(1)-O(3)        | 1.99              |
| Fe(1)-O(9)        | 1.89              | Fe(1)-O(1)        | 1.91              |
| Fe(1)-N(1)        | 2.15              | Fe(1)-N(17)       | 2.18              |
| Fe(1)-N(2)        | 2.21              | Fe(1)-N(15)       | 2.20              |
| Fe(2)-O(3)        | 1.94              | Fe(2)-O(4)        | 1.90              |
| Fe(2)-O(6)        | 1.95              | Fe(2)-O(3)        | 1.98              |
| Fe(2)-O(8)        | 1.89              | Fe(2)-O(7)        | 1.94              |
| Fe(2)-O(4)        | 2.07              | Fe(2)-O(9)        | 2.06              |
| Fe(2)-N(3)        | 2.16              | Fe(2)-N(11)       | 2.20              |
| Fe(2)-N(4)        | 2.18              | Fe(2)-N(16)       | 2.20              |

**Table S4. Some key interatomic distances (Å) in sMMO<sub>ox</sub> according to known literature<sup>[12]</sup>.**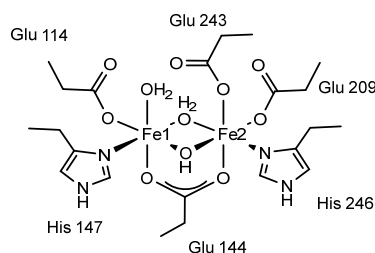

| Atom | Atom                    | Distance (Å) |
|------|-------------------------|--------------|
| Fe1  | Fe2                     | 3.1          |
| Fe1  | Glu 114 O               | 1.9          |
| Fe1  | His 147 N               | 2.1          |
| Fe1  | Glu 144 O               | 2.1          |
| Fe1  | $\mu$ OH O              | 1.7          |
| Fe1  | OH <sub>2</sub> O       | 2.3          |
| Fe1  | $\mu$ OH <sub>2</sub> O | 2.3          |
| Fe2  | Glu 209 O               | 1.9          |
| Fe2  | His 246 N               | 2.2          |
| Fe2  | Glu 243 O               | 2.0          |
| Fe2  | Glu 144 O               | 2.5          |
| Fe2  | $\mu$ OH O              | 2.0          |
| Fe2  | OH <sub>2</sub> O       | 2.5          |

## References

1. Armarego, W. L. F.; Chai, C. L. L. *Purification of Laboratory Chemicals*, 7th ed.; Butterworth-Heinemann: Oxford, U.K., 2013.
2. Saito, K.; Shibata, Y.; Yamanaka, M.; Akiyama, T. Chiral phosphoric acid-catalyzed oxidative kinetic resolution of indolines based on transfer hydrogenation to imines. *J. Am. Chem. Soc.* **2013**, *135*, 11740.
3. McComas, C. C.; Gilbert, E. J.; Van Vranken, D. L. Stereochemistry of 3-alkylindole dimerization: acyclic  $\delta_1, \delta_1'$ -tryptophan dimers. *J. Org. Chem.* **1997**, *62*, 8600.
4. Lin, A.; Yang, J.; Hashim, M. N-Indolyltriethylborate: a useful reagent for synthesis of C3-quaternary indolenines. *Org. Lett.* **2013**, *15*, 1950.
5. Wang, G.; Lu, R.; He, C.; Liu, L. Kinetic resolution of indolines by asymmetric hydroxylamine formation. *Nat. Commun.* **2021**, *12*, 2512.
6. Saccoccia, F.; Brindisi, M.; Gimmelli, R.; Relitti N.; Guidi, A.; Saraswati, P.; Cavella, C.; Brogi, S.; Chemi, G.; Butini, S.; Papoff, G.; Senger, J.; Herp, D.; Jung, M.; Campiani, G.; Gemma, S.; Ruberti, G. Screening and phenotypical characterization of schistosoma mansoni histone deacetylase 8 (*SmHDAC8*) inhibitors as multistage antischistosomal agents. *ACS Infect. Dis.* **2020**, *6*, 100.
7. Yang, Z.; Chen, F.; He, Y.; Yang, N.; Fan, Q.-H. Highly enantioselective synthesis of indolines: asymmetric hydrogenation at ambient temperature and pressure with cationic ruthenium diamine catalysts. *Angew. Chem. Int. Ed.* **2016**, *55*, 13863.
8. Brown, D. W.; Graupner, P. R.; Sainsbury, M.; Shertzer, H. G. New antioxidants incorporating indole and indoline chromophores. *Tetrahedron*, **1991**, *47*, 4383.
9. Murray, J. I.; Flodén, N. J.; Bauer, A.; Fessner, N. D.; Dunkleermann, D. L.; Bob-Egbe, O.; Rzepa, H. S.; Bürgi, T.; Richardson, J.; Spivey, A. C. Kinetic resolution of 2-substituted indolines by *N*-Sulfonylation using an atropisomeric 4-DMAP-*N*-oxide organocatalyst. *Angew. Chem., Int. Ed.* **2017**, *56*, 5760.
10. Lee, Y. E.; Cao, T.; Torruellas, C.; Kozlowski, M. C. Selective oxidative homo- and cross-coupling of phenols with aerobic catalysts. *J. Am. Chem. Soc.* **2014**, *136*,

6782.

11. Lackner, A. D.; Samant, A. V.; Toste, F. D. Single-operation deracemization of 3H-indolines and tetrahydroquinolines enabled by phase separation. *J. Am. Chem. Soc.* **2013**, *135*, 14090.
12. Rosenzweig, A. C.; Nordlund, P.; Takahara, P. M.; Frederick, C. A.; Lippard, S. J. Geometry of the soluble methane monooxygenase catalytic diiron center in two oxidation states. *Chemistry & Biology*. **1995**, *2*: 409.

# NMR spectra

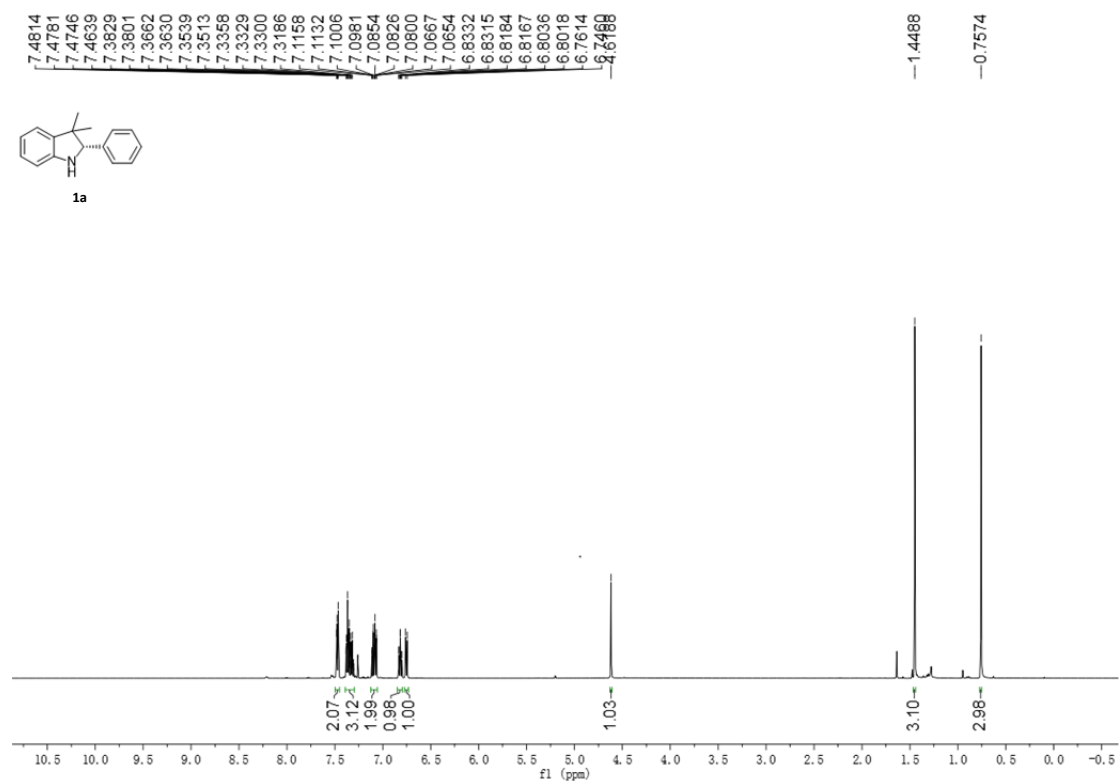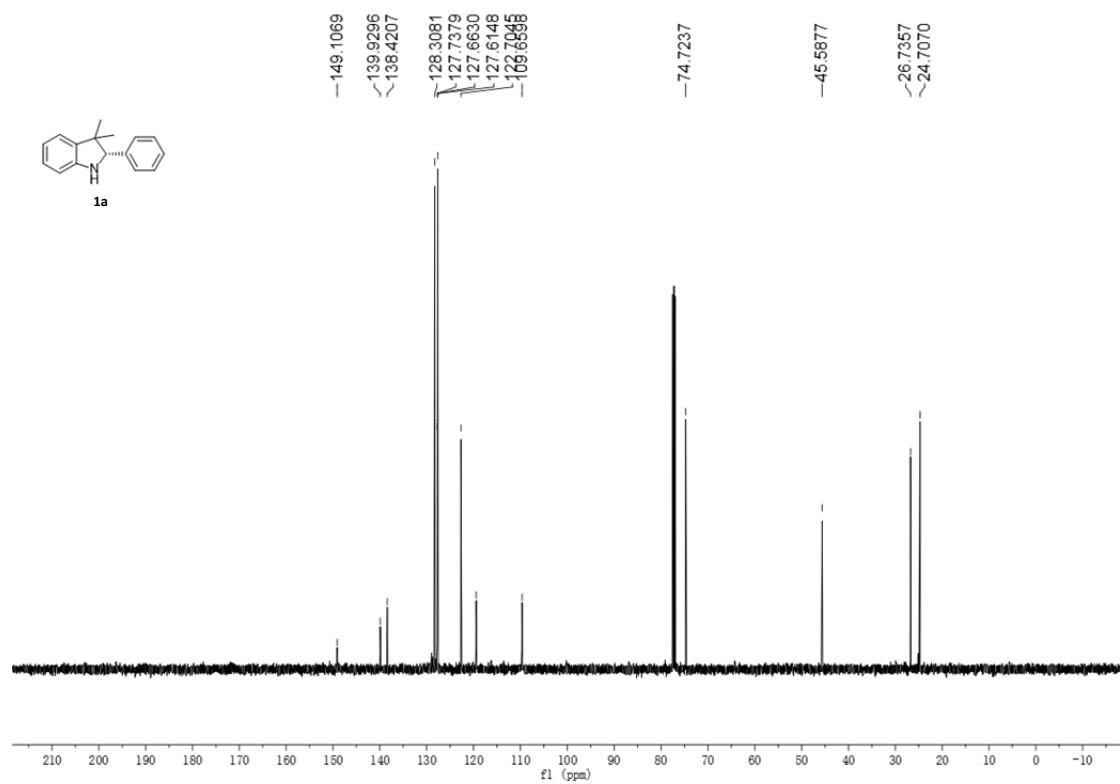

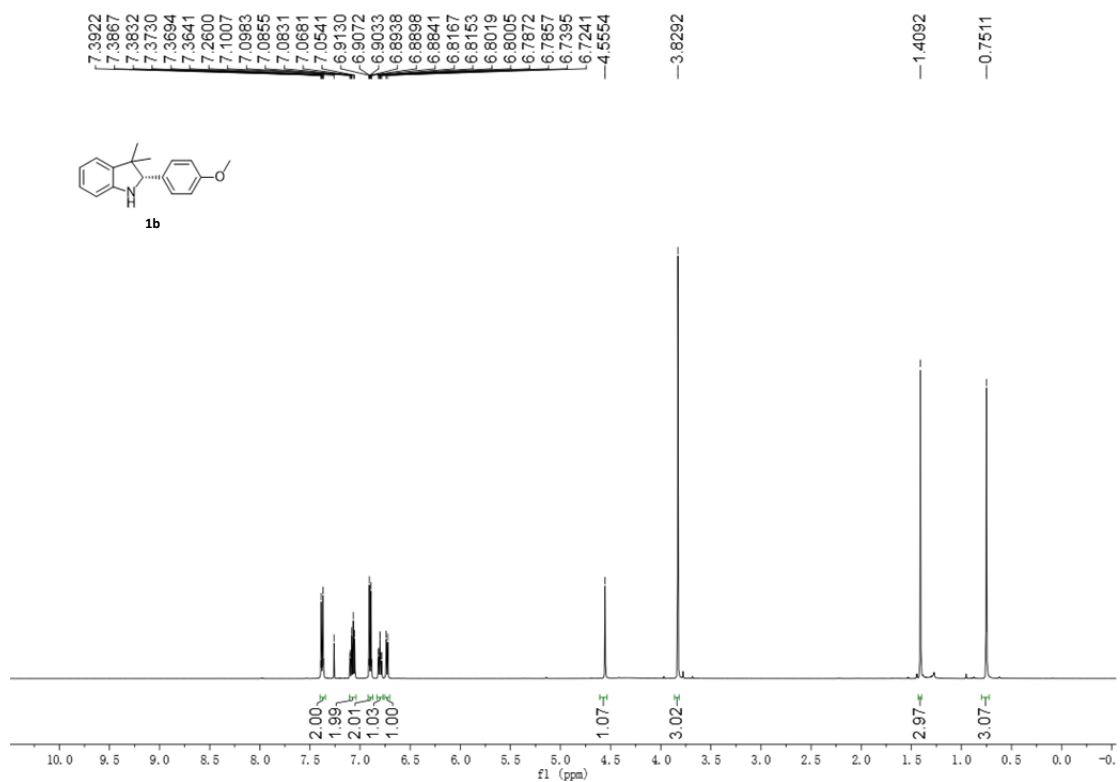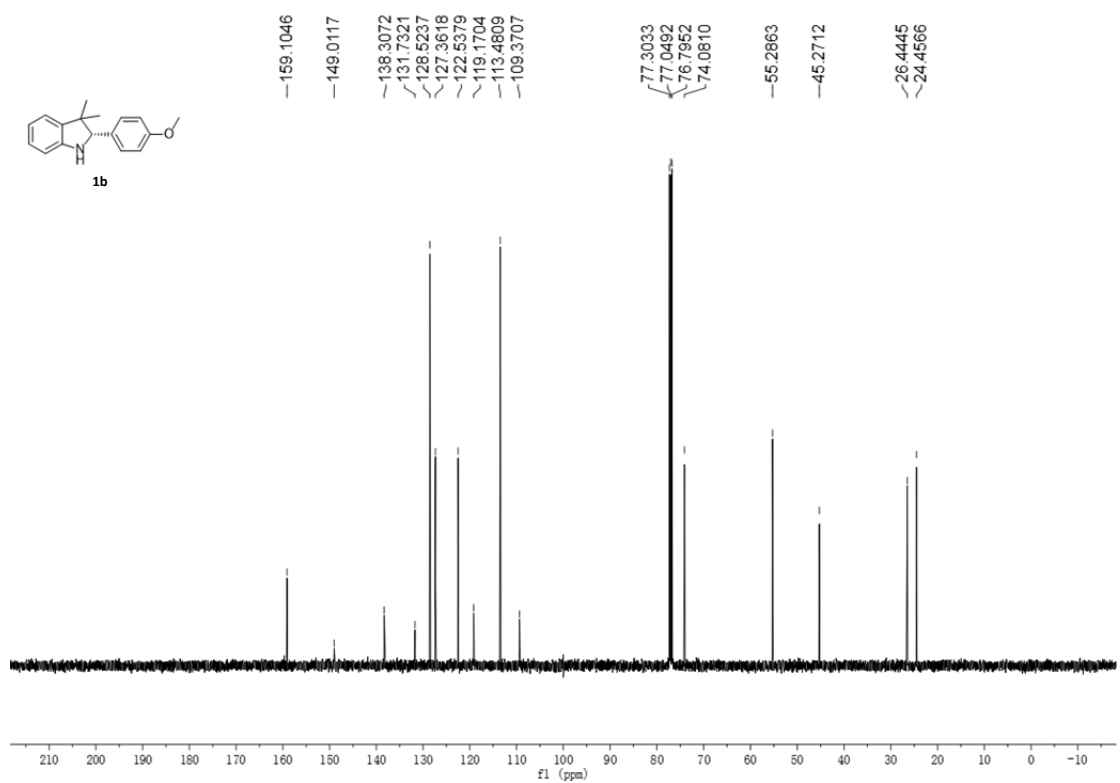

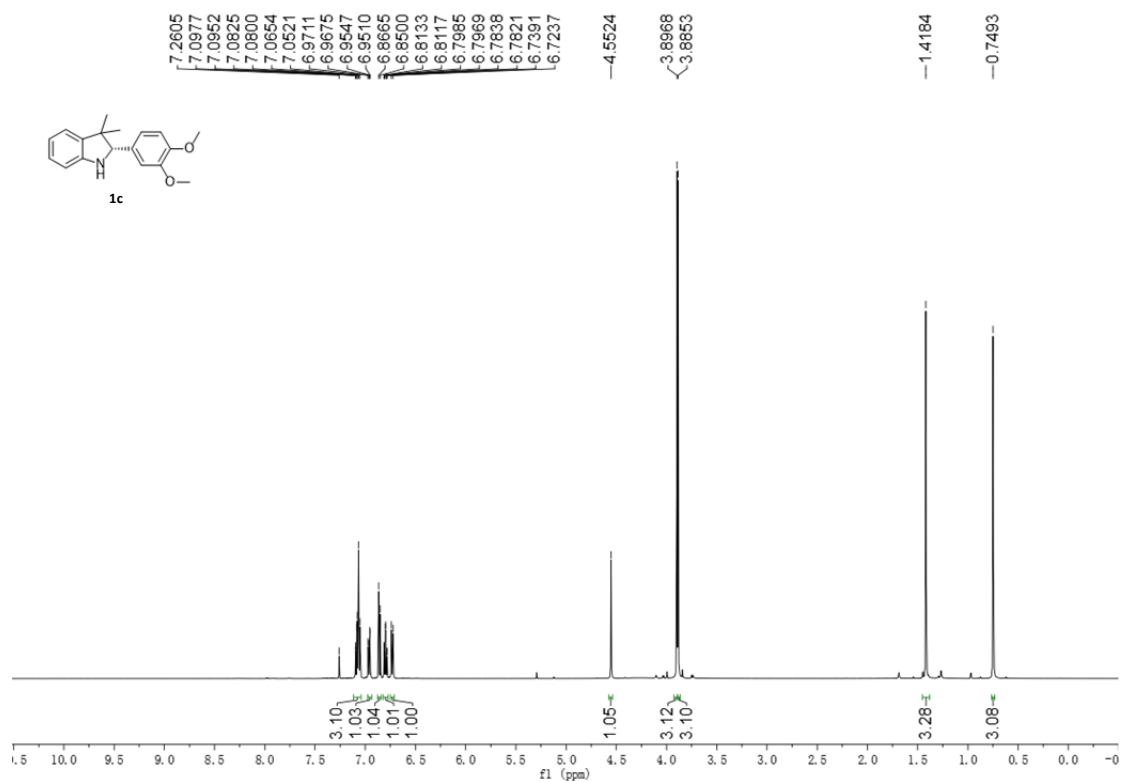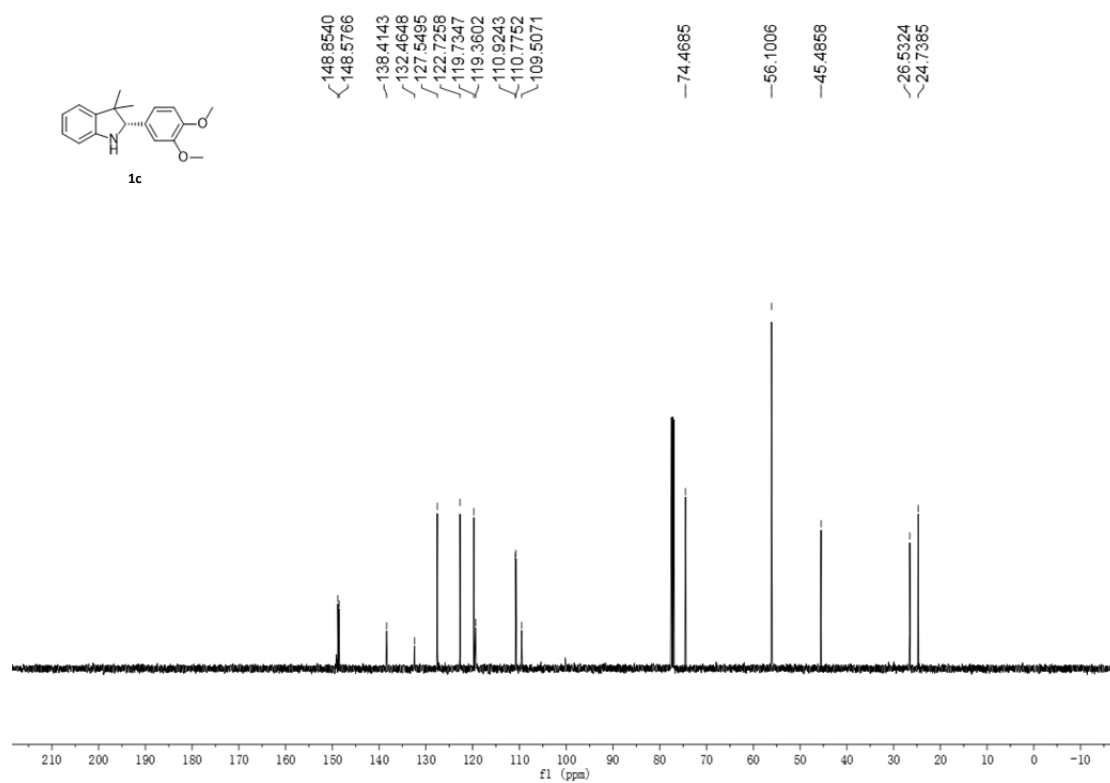

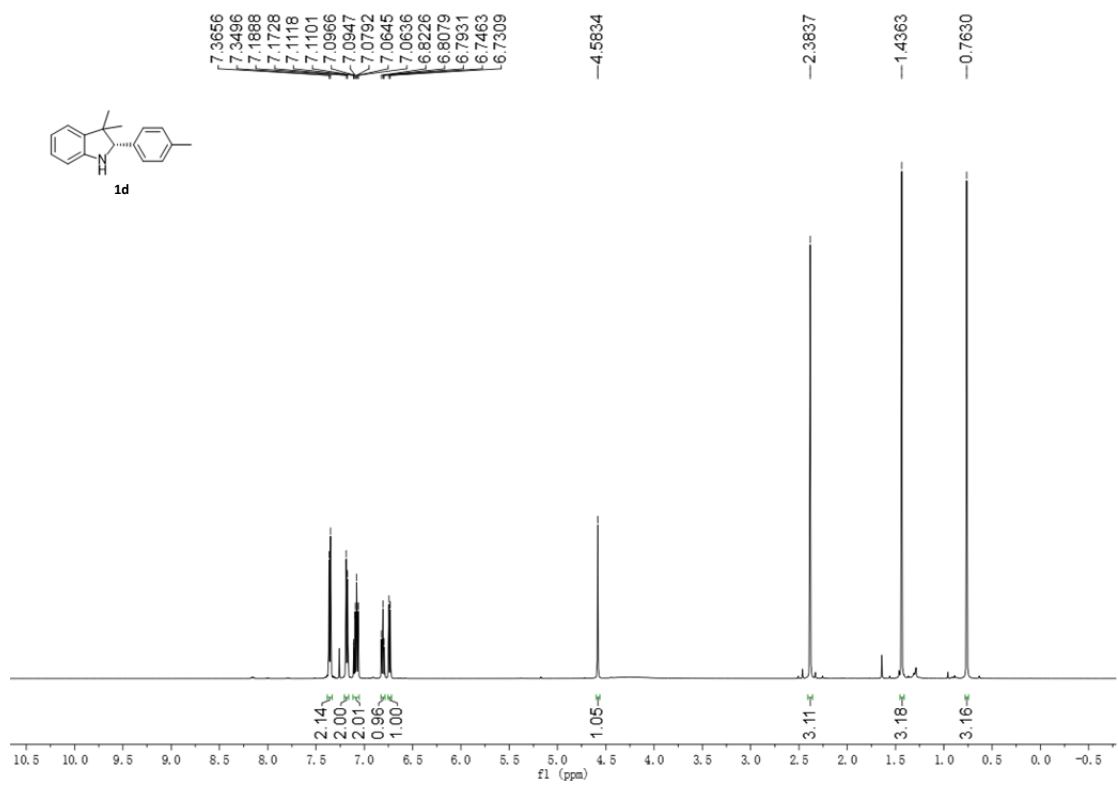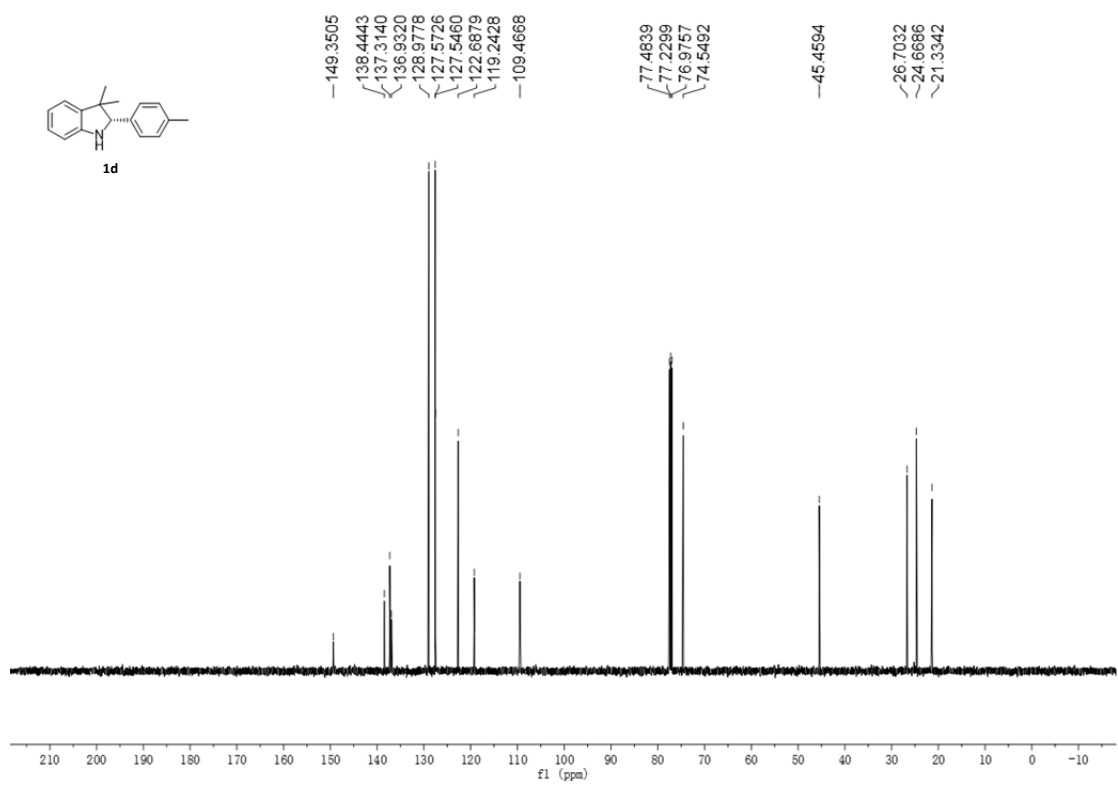



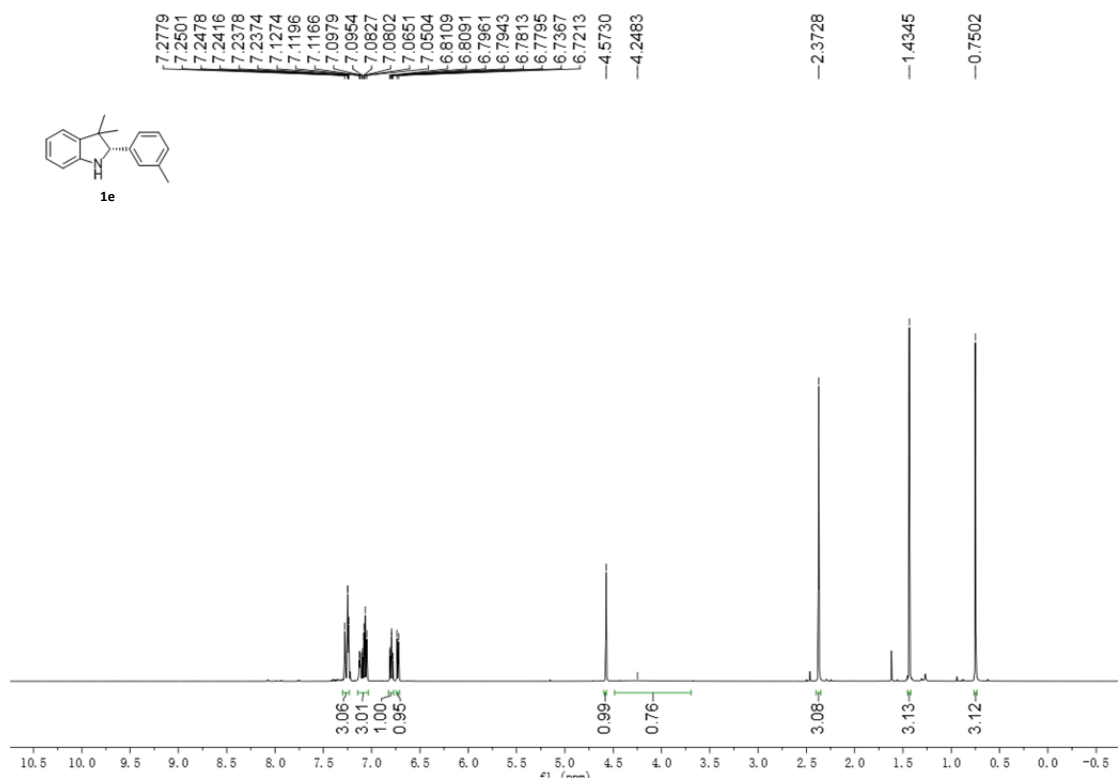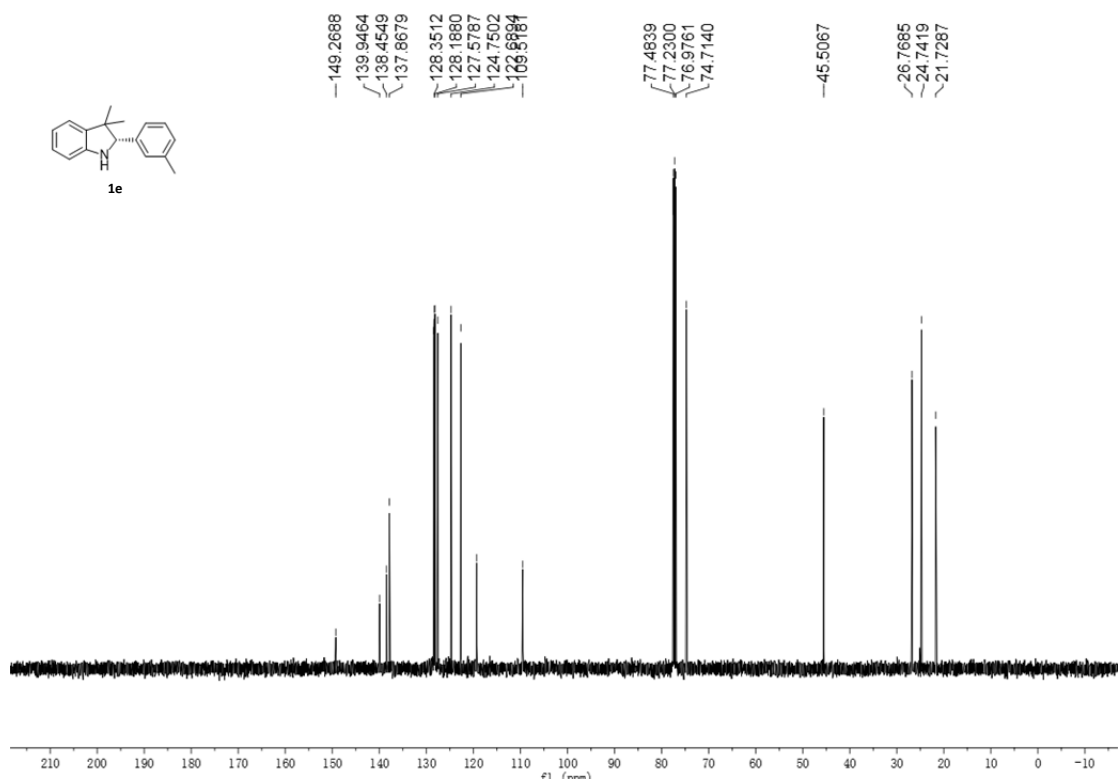

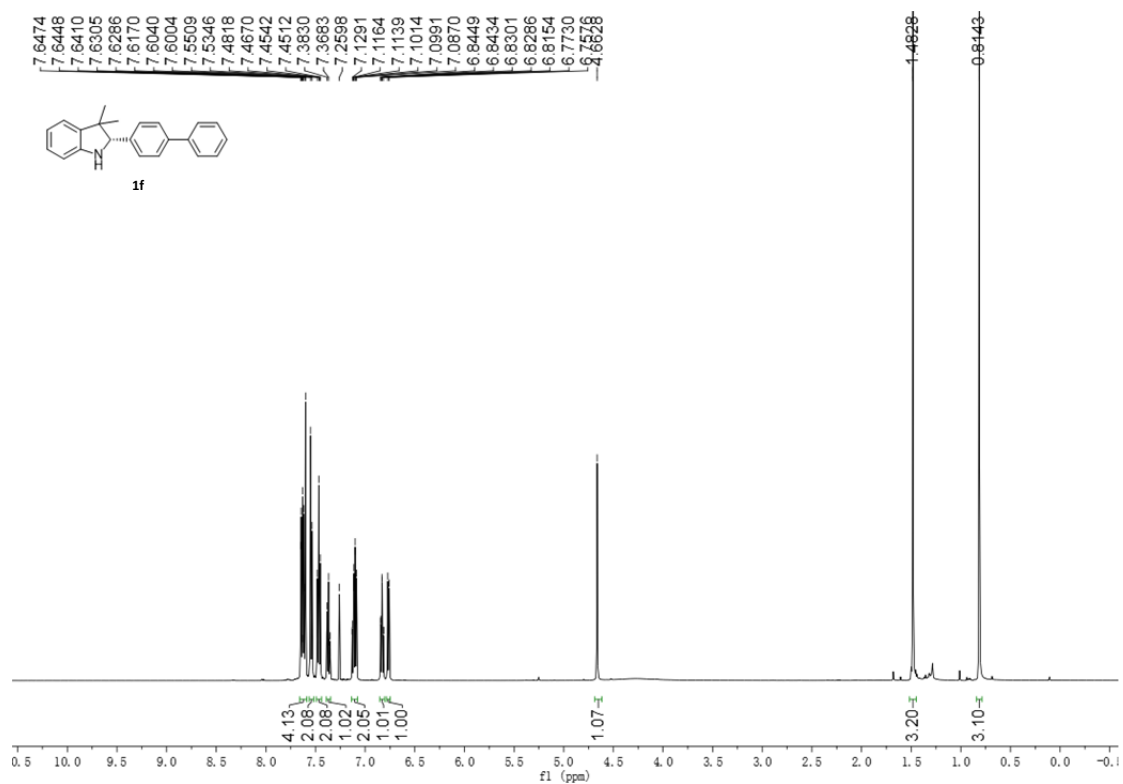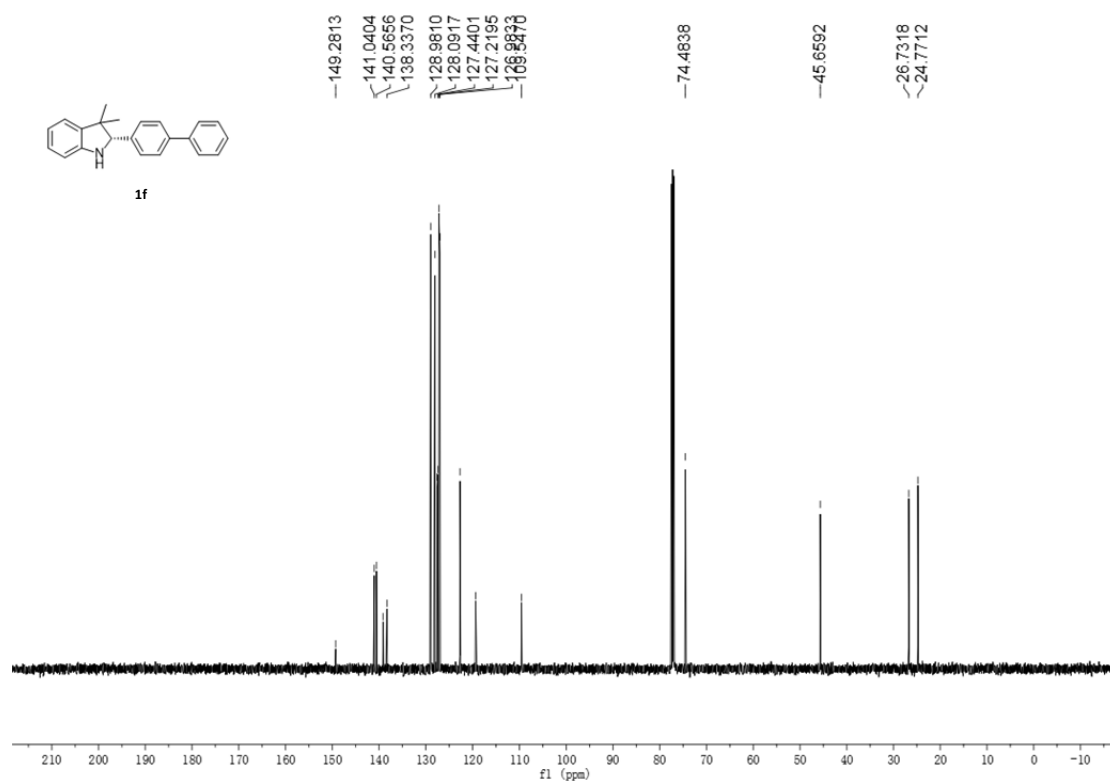

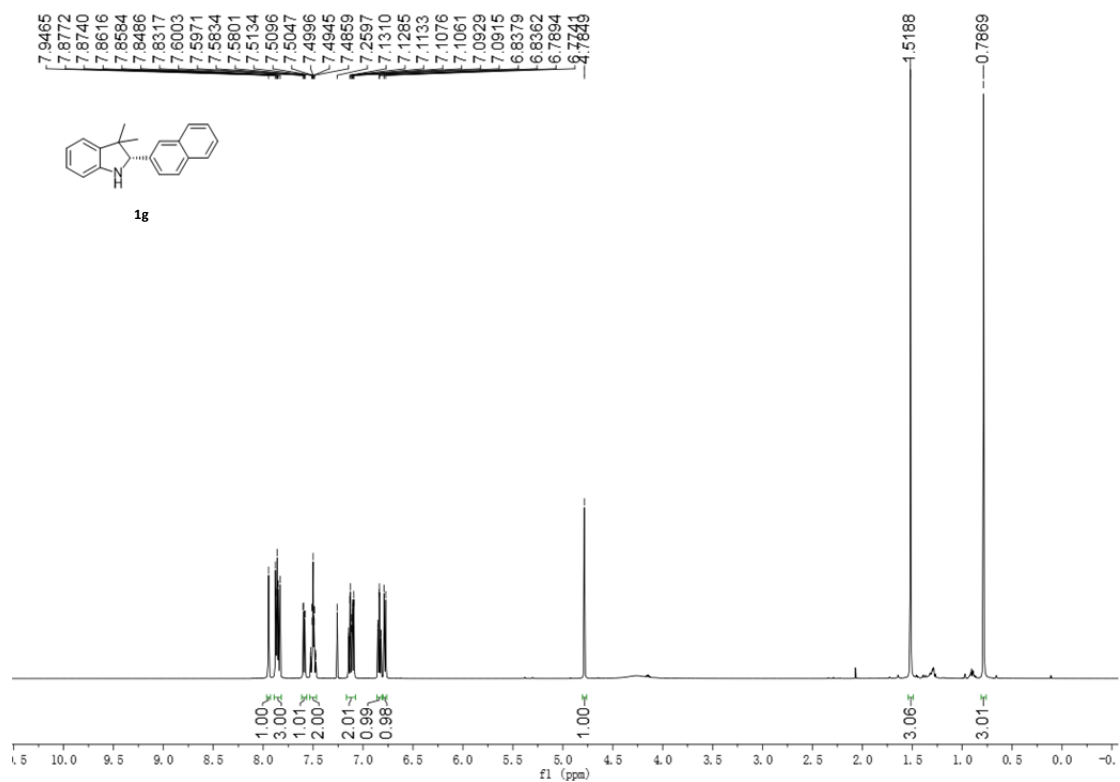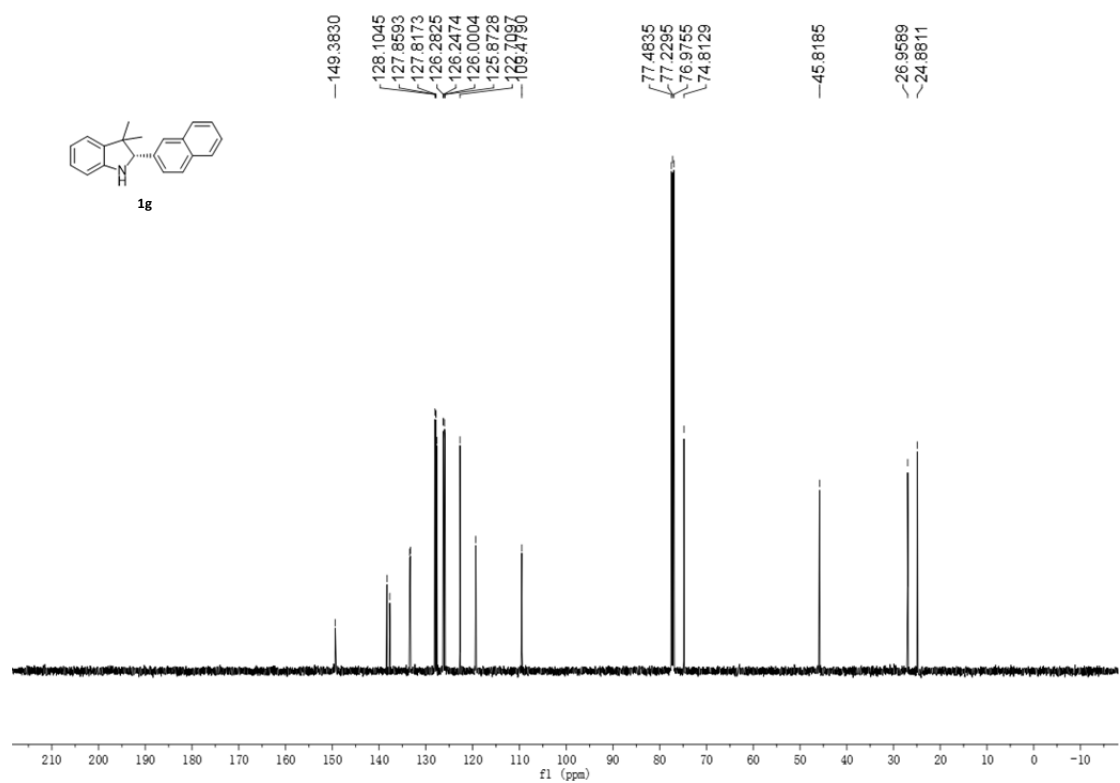

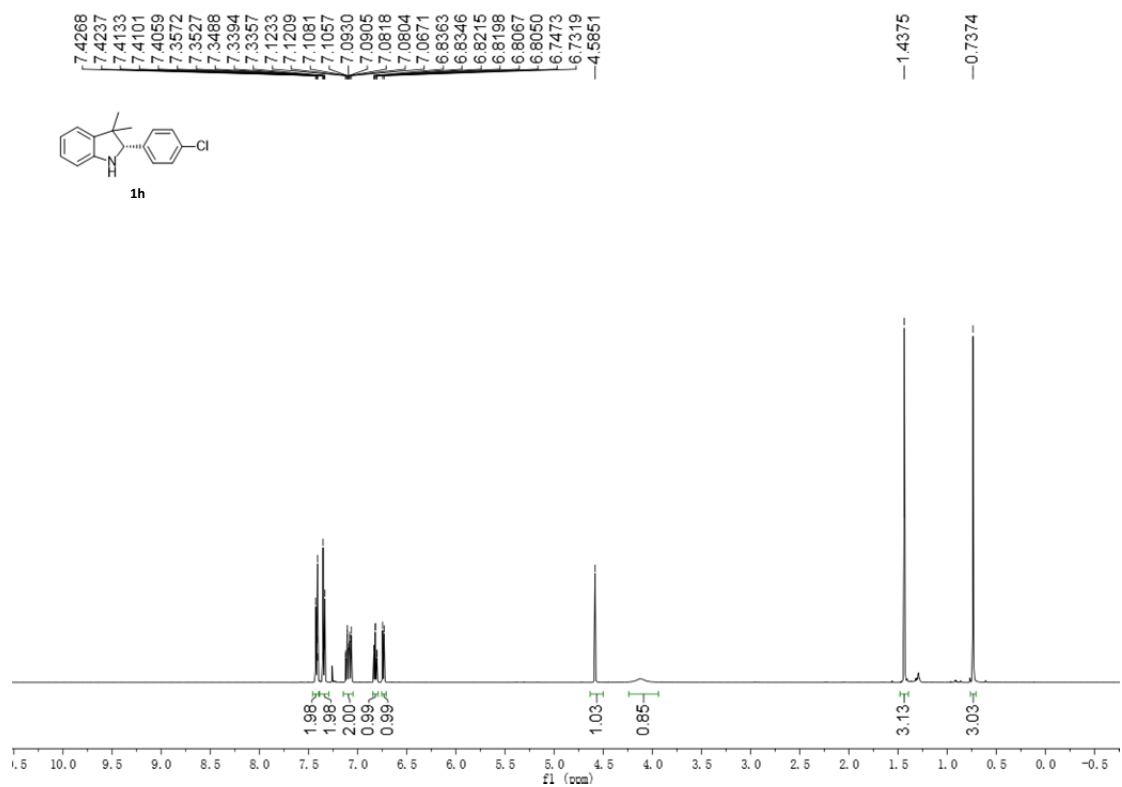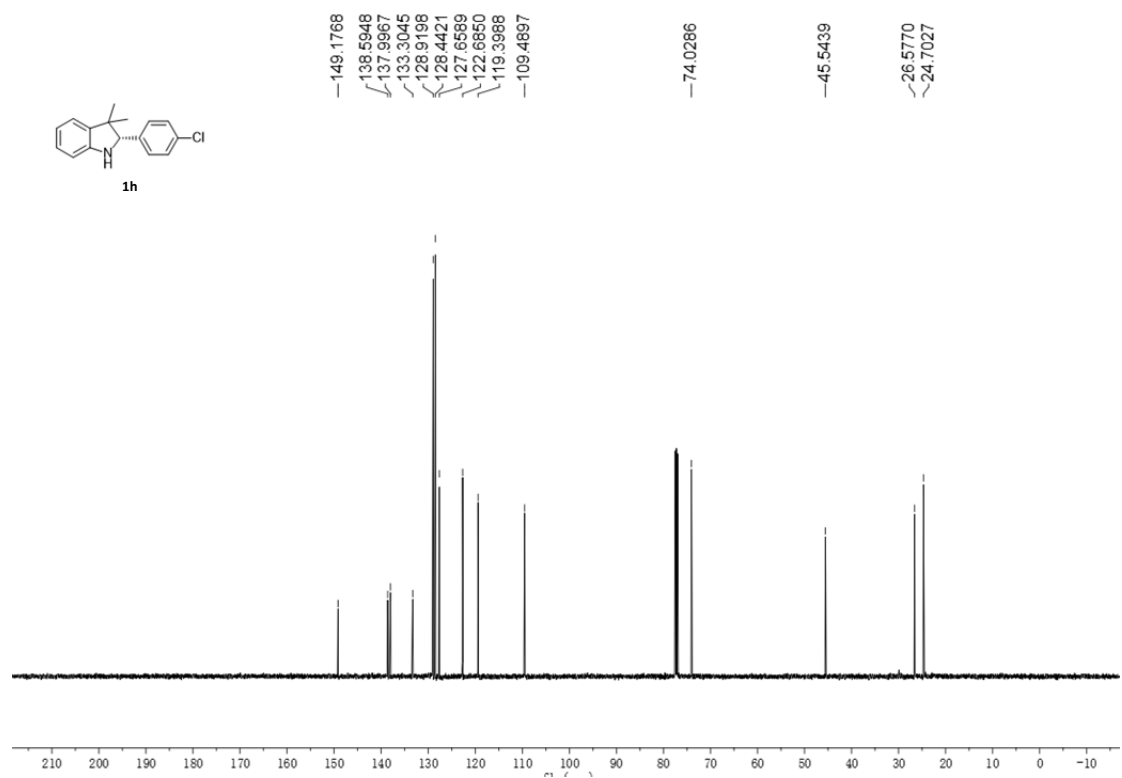

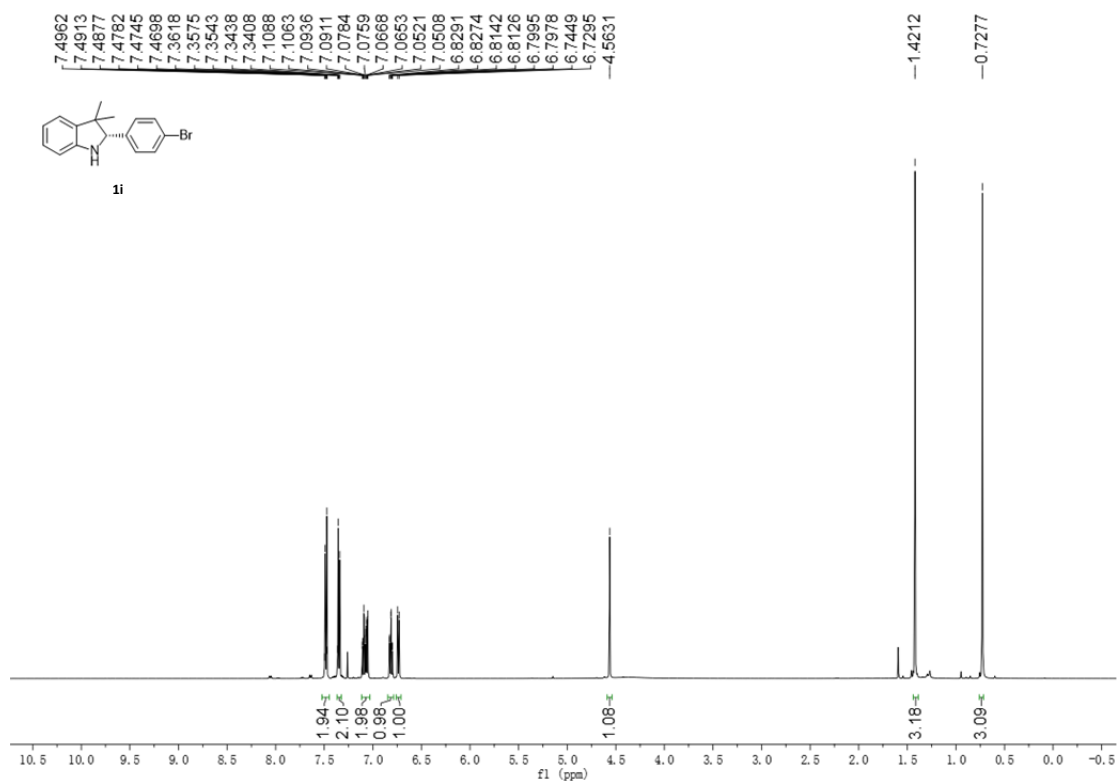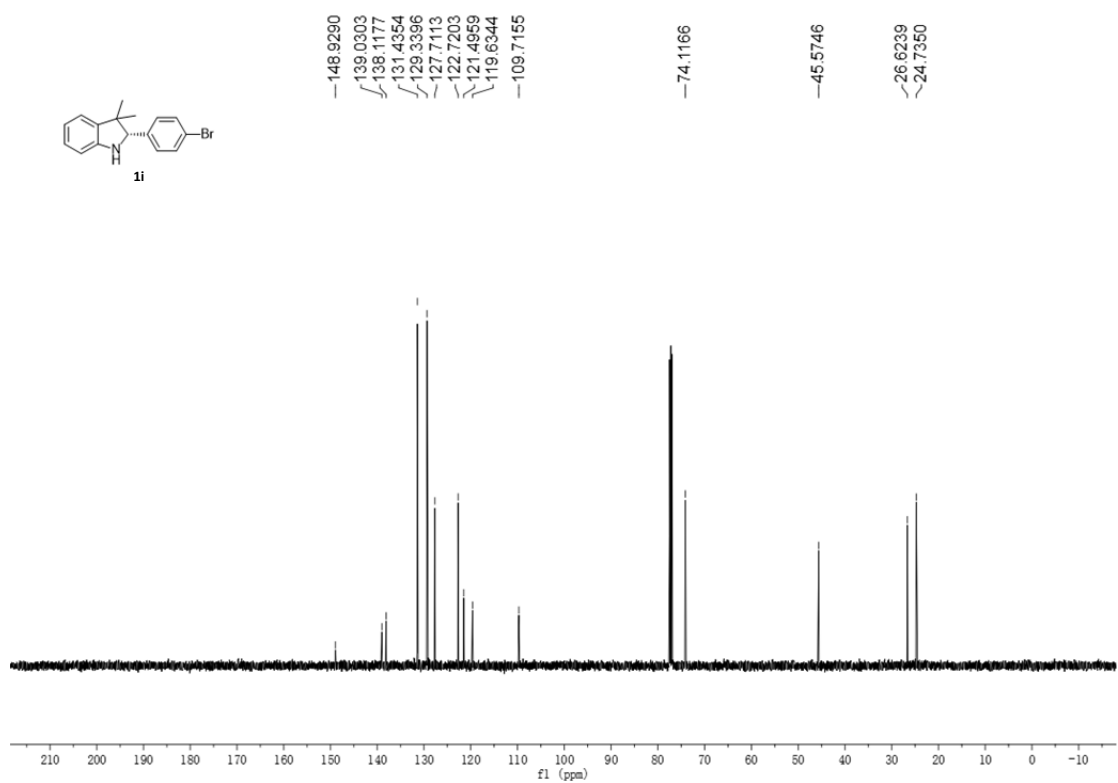

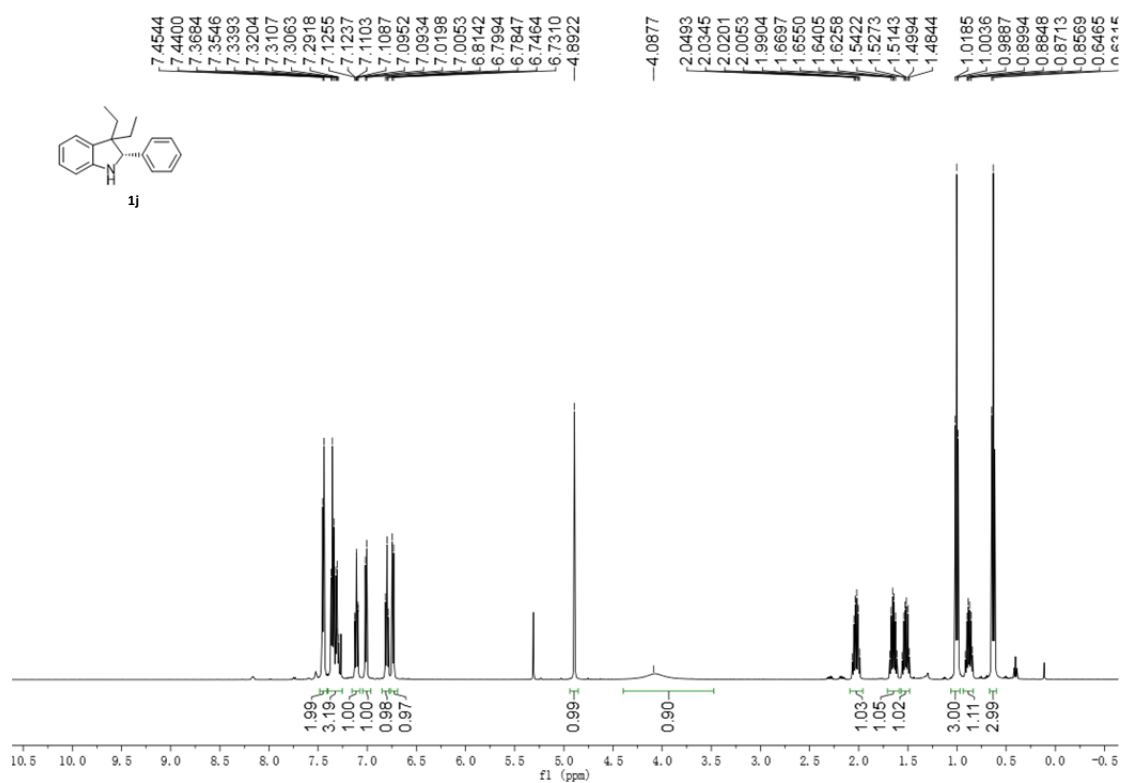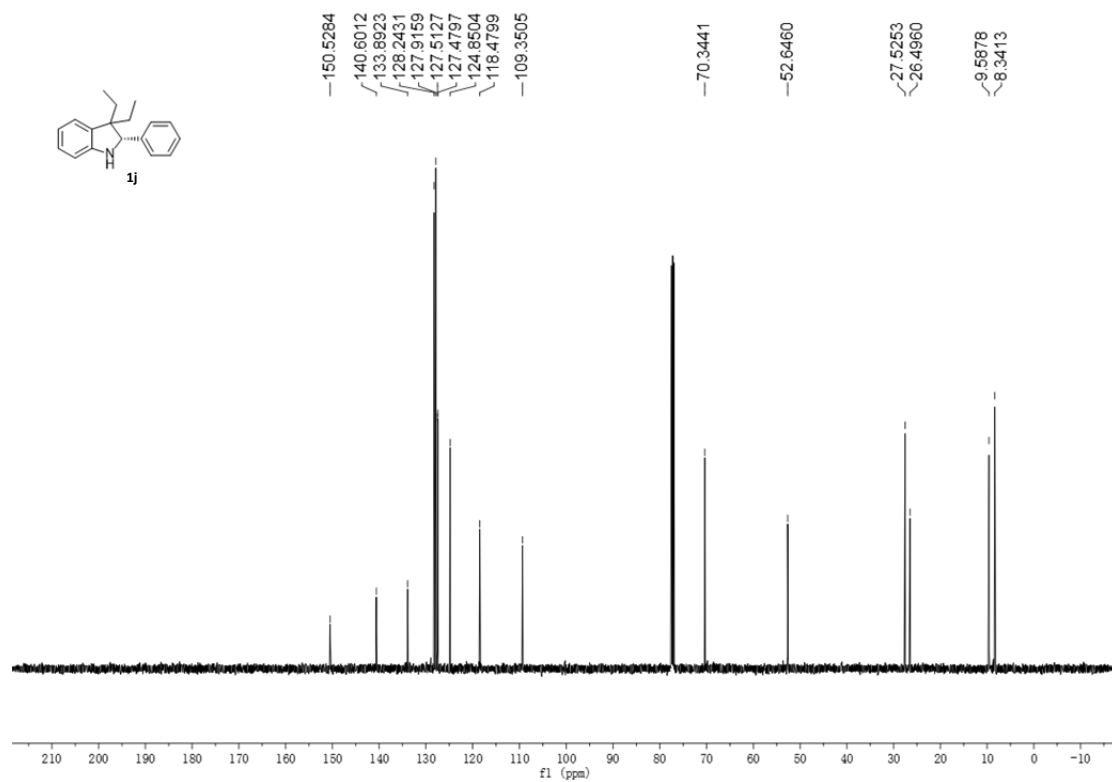

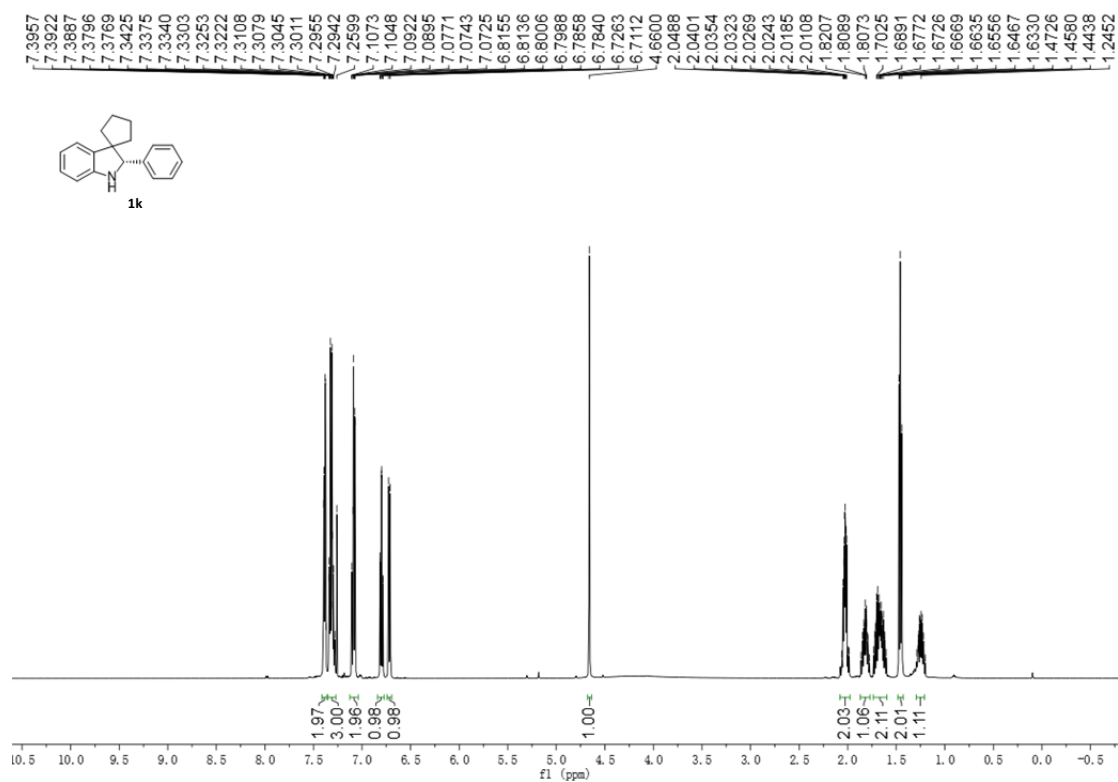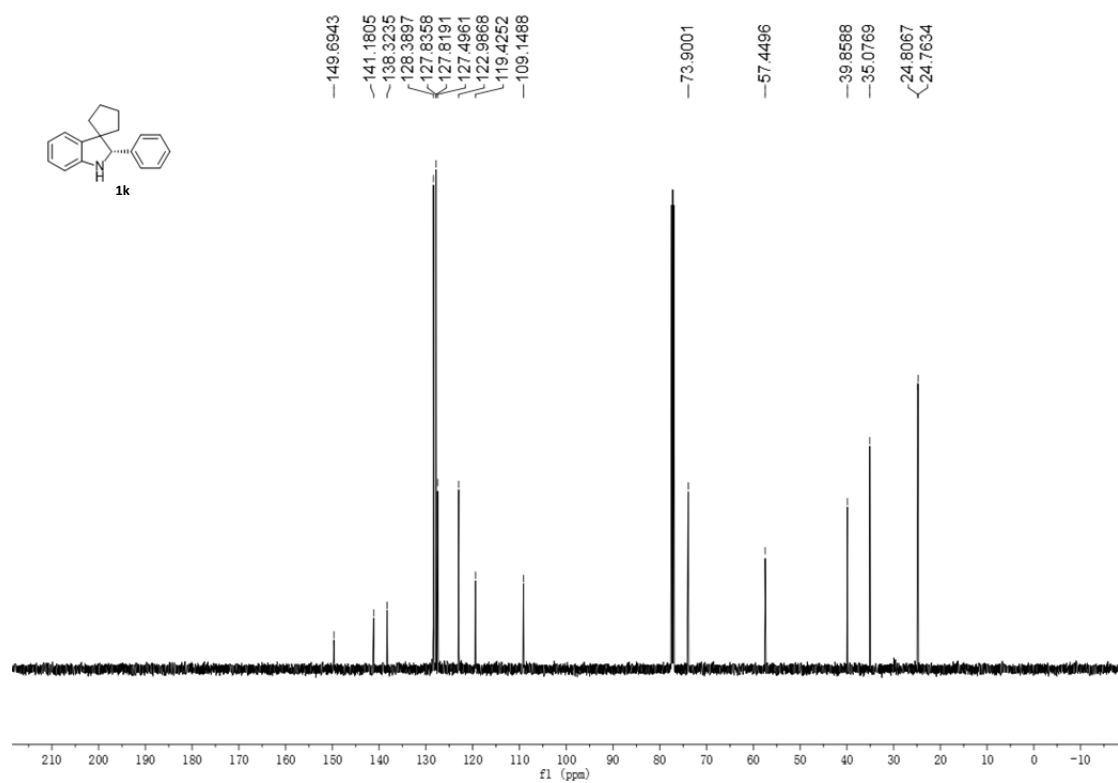

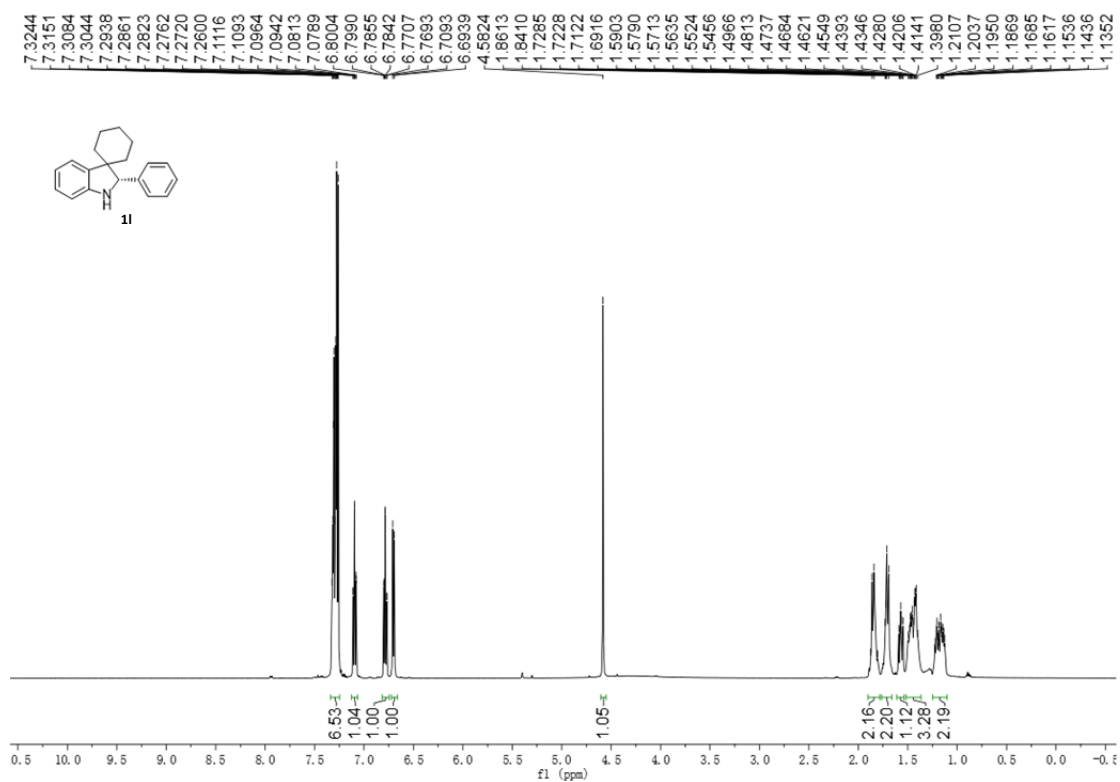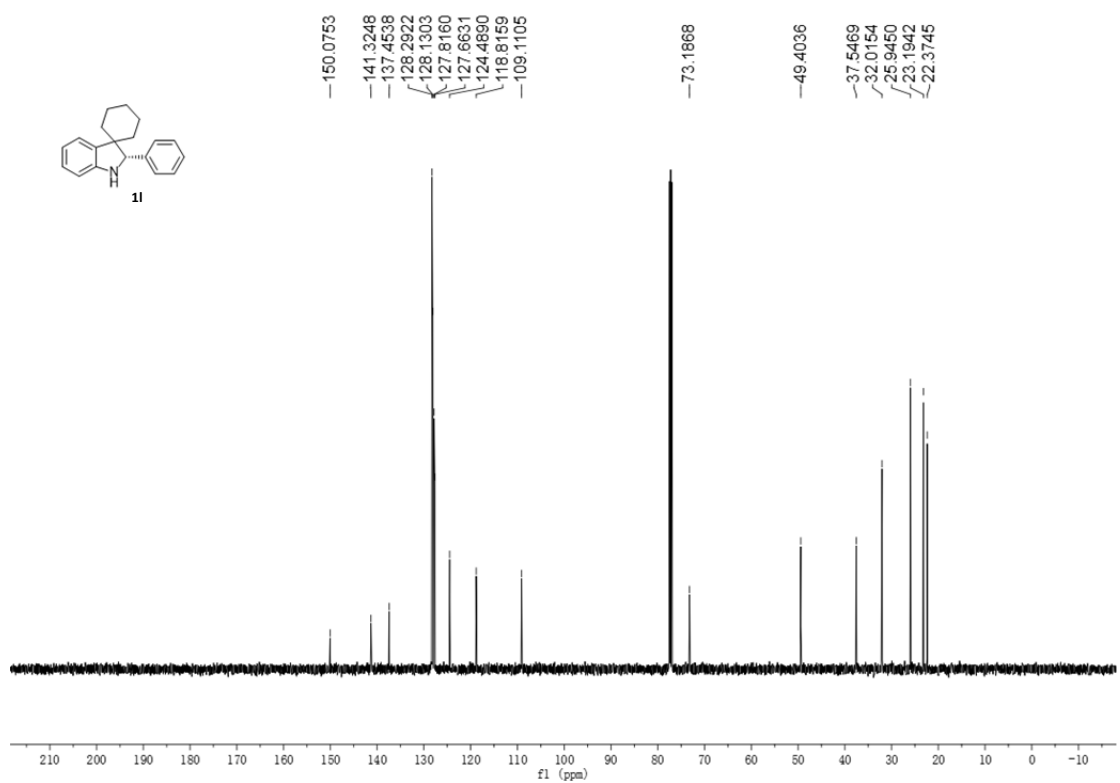



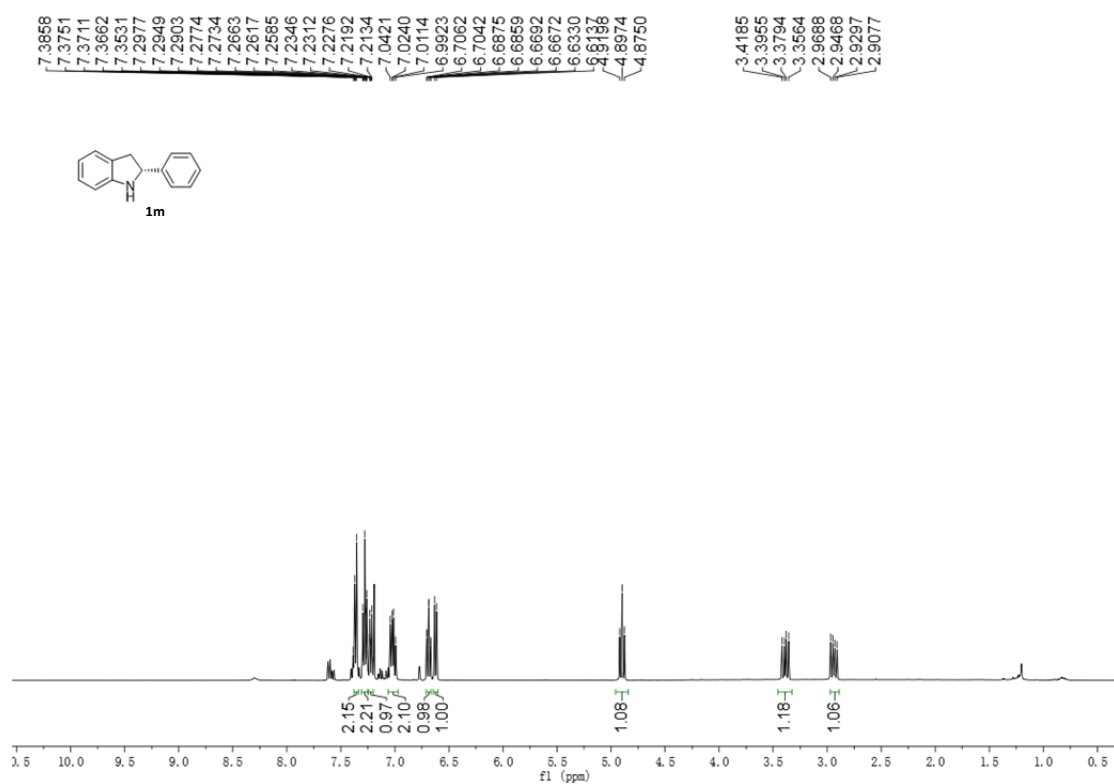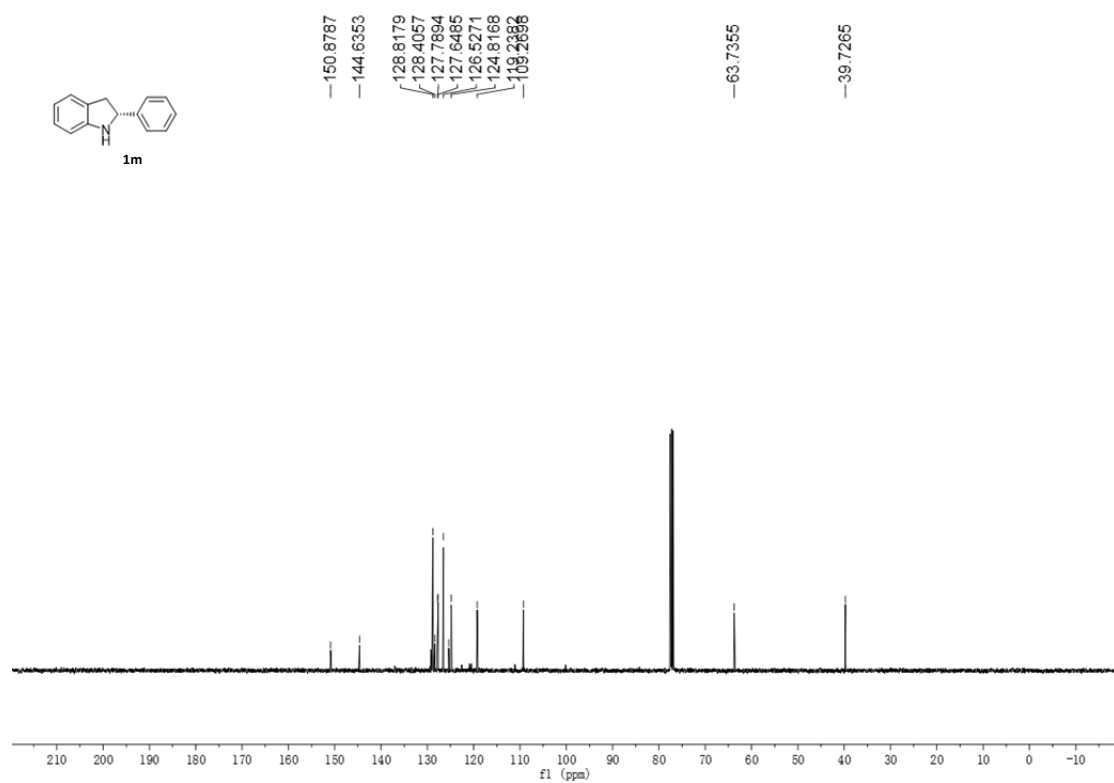

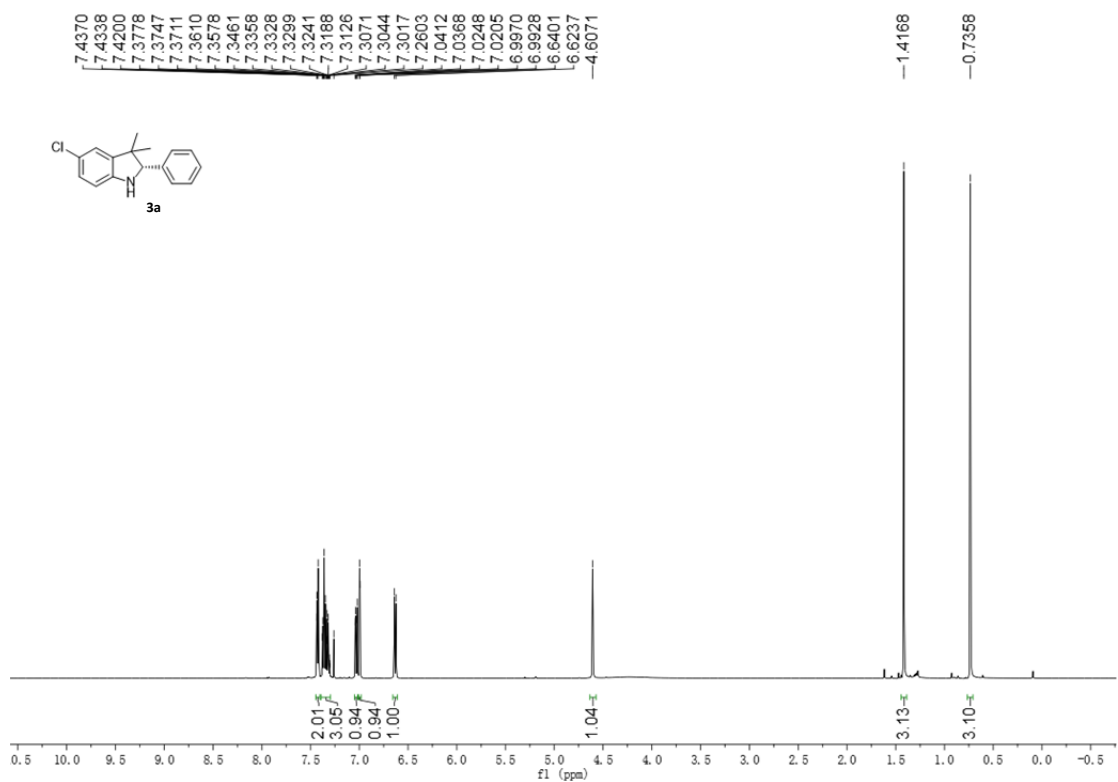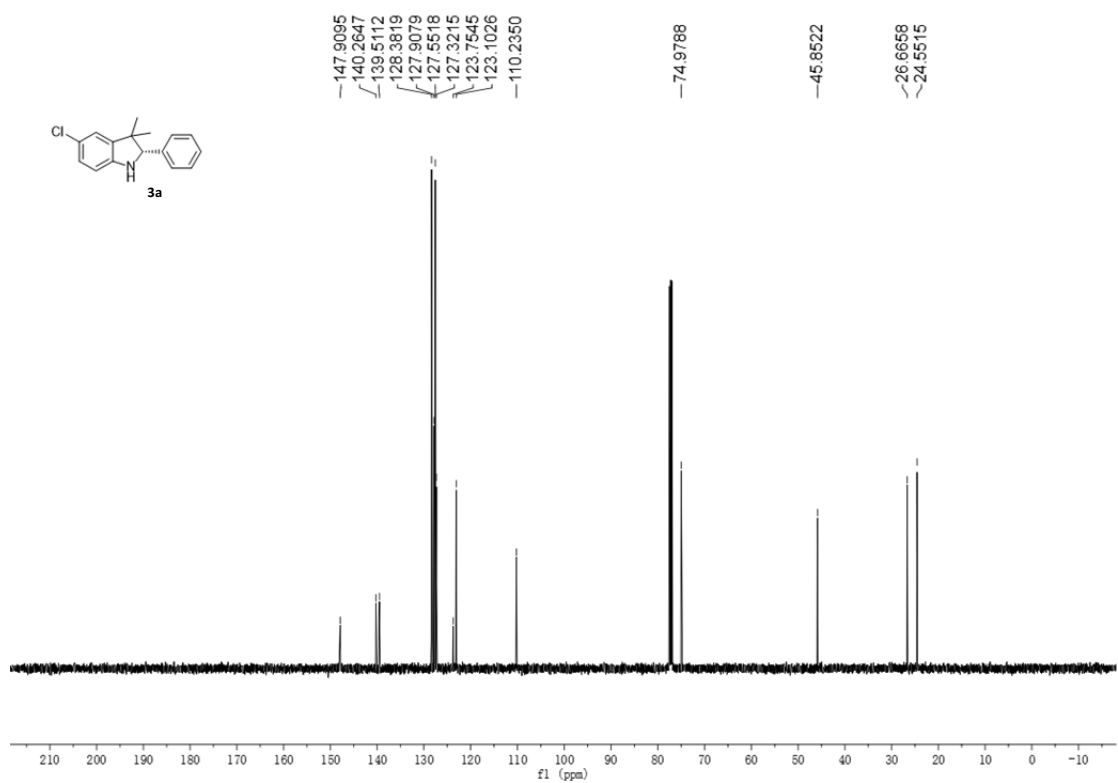

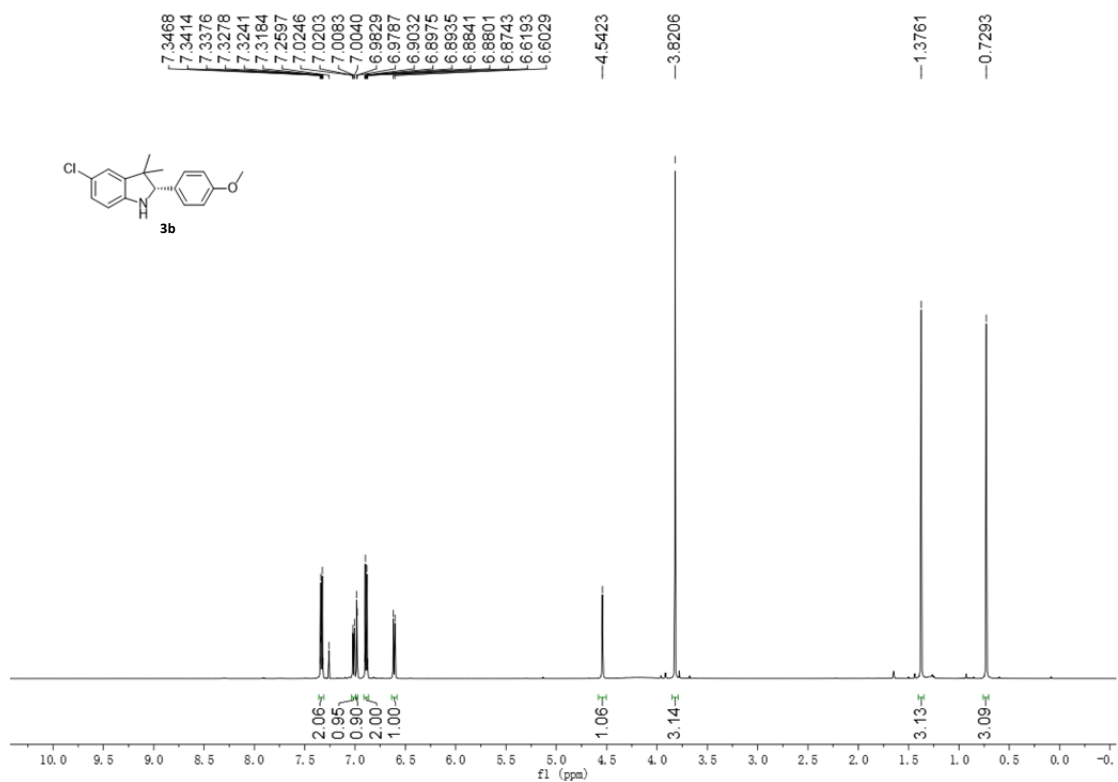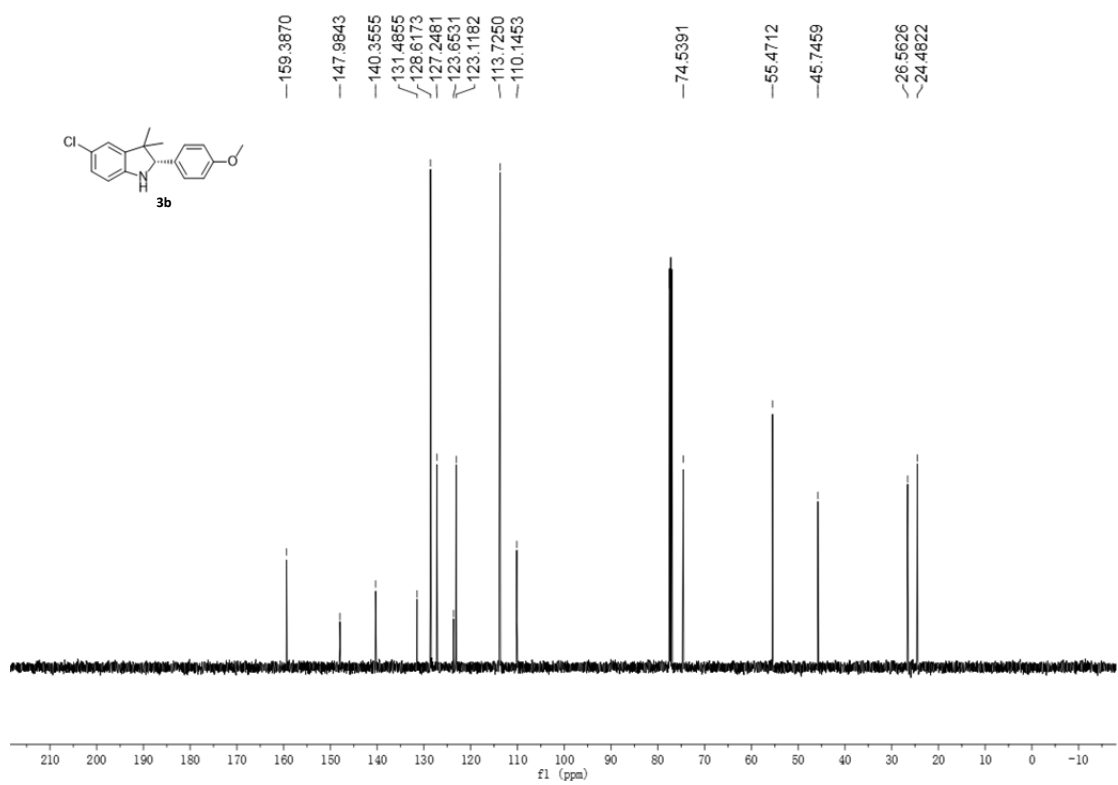

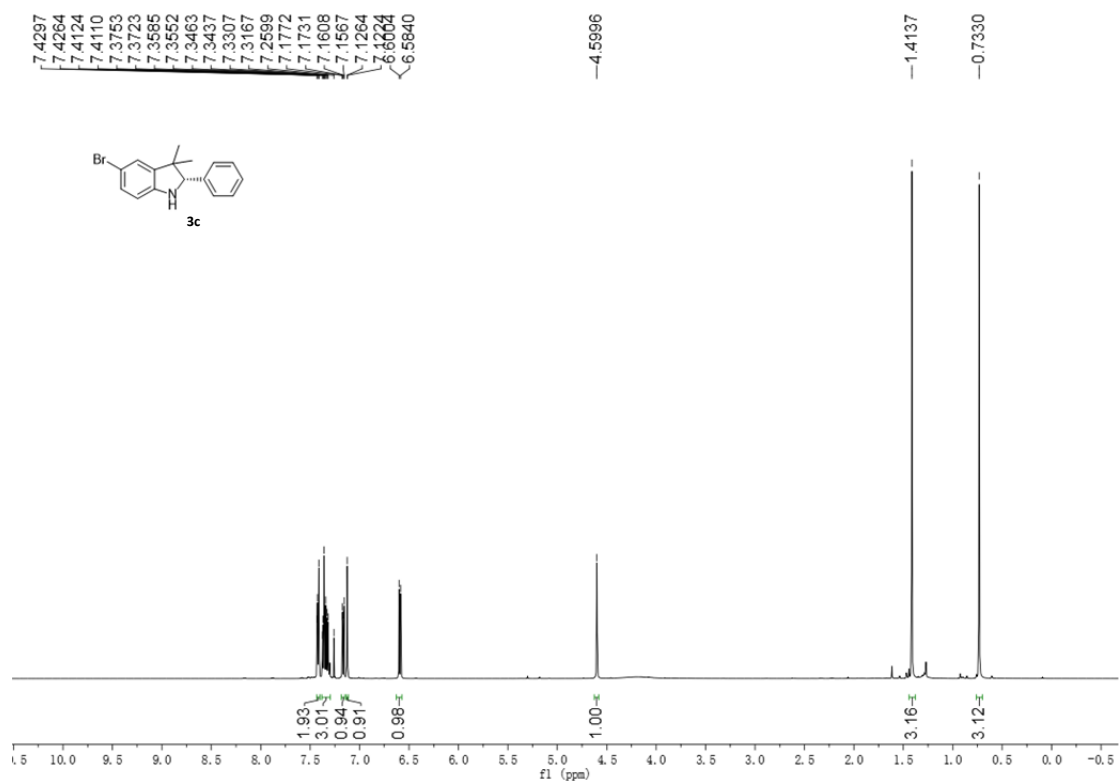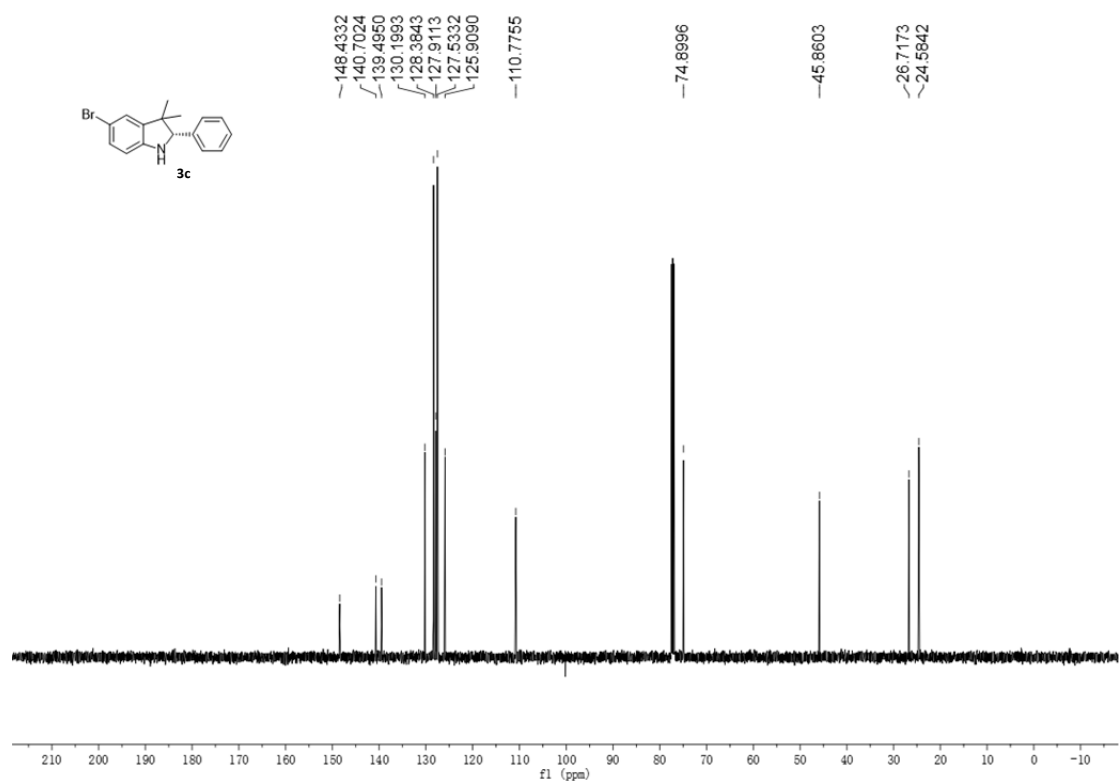

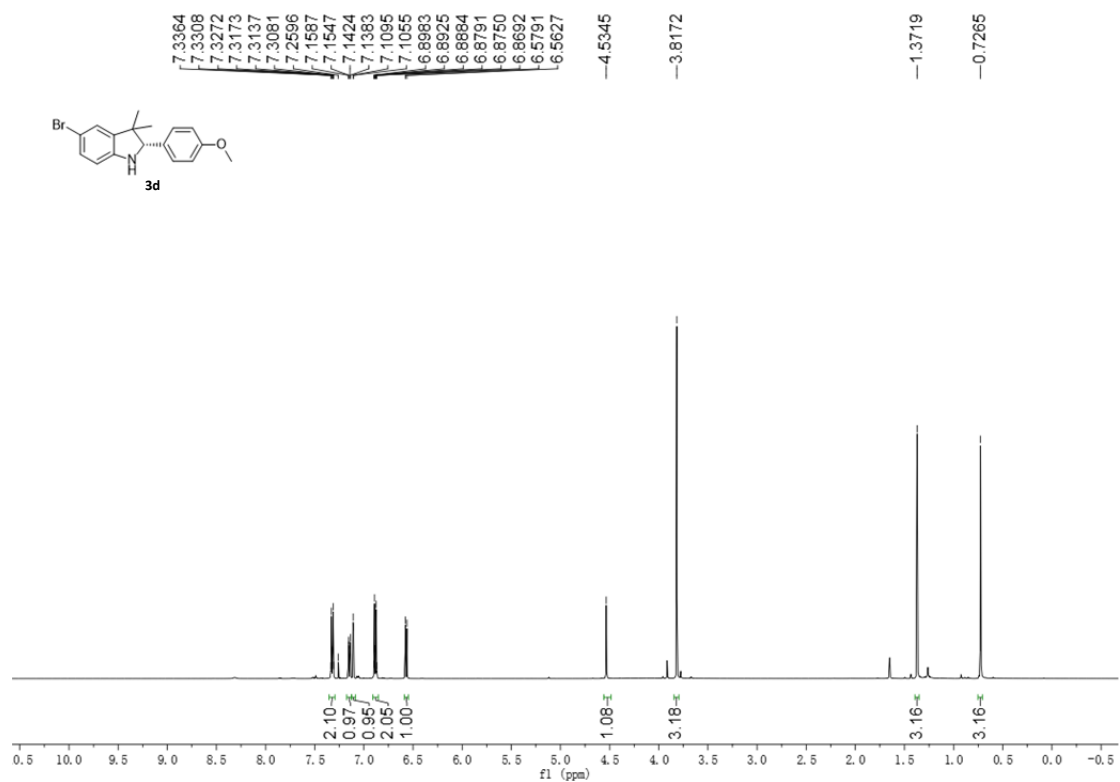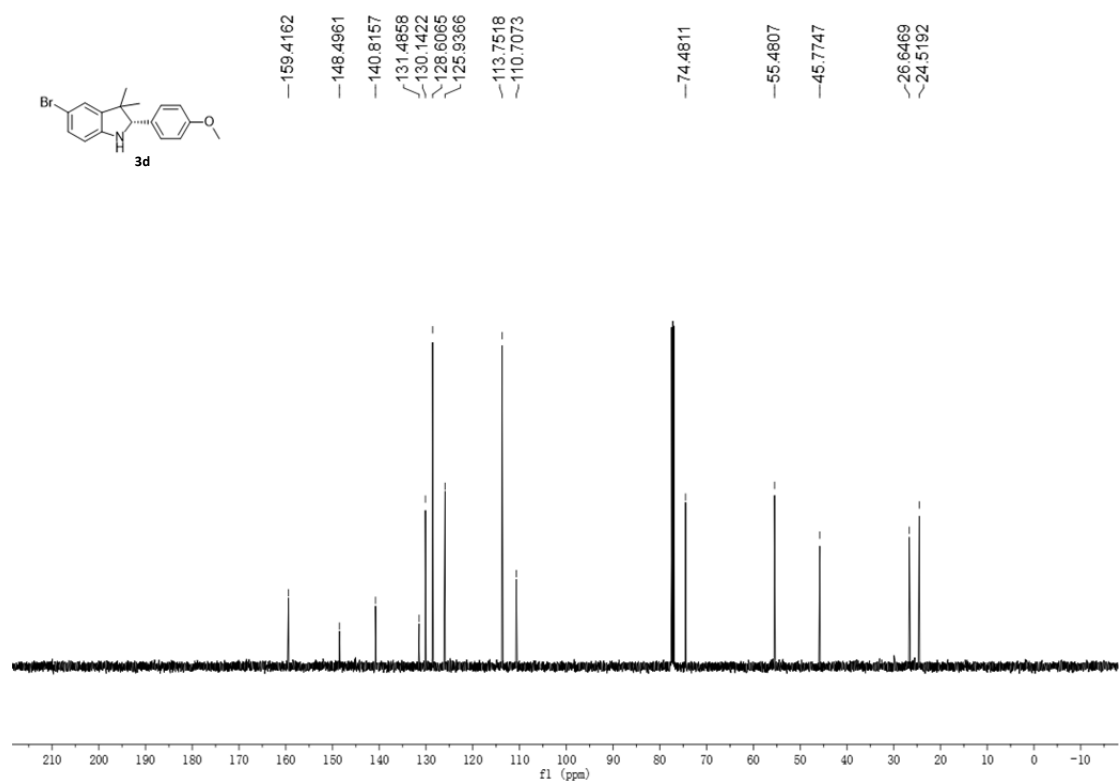

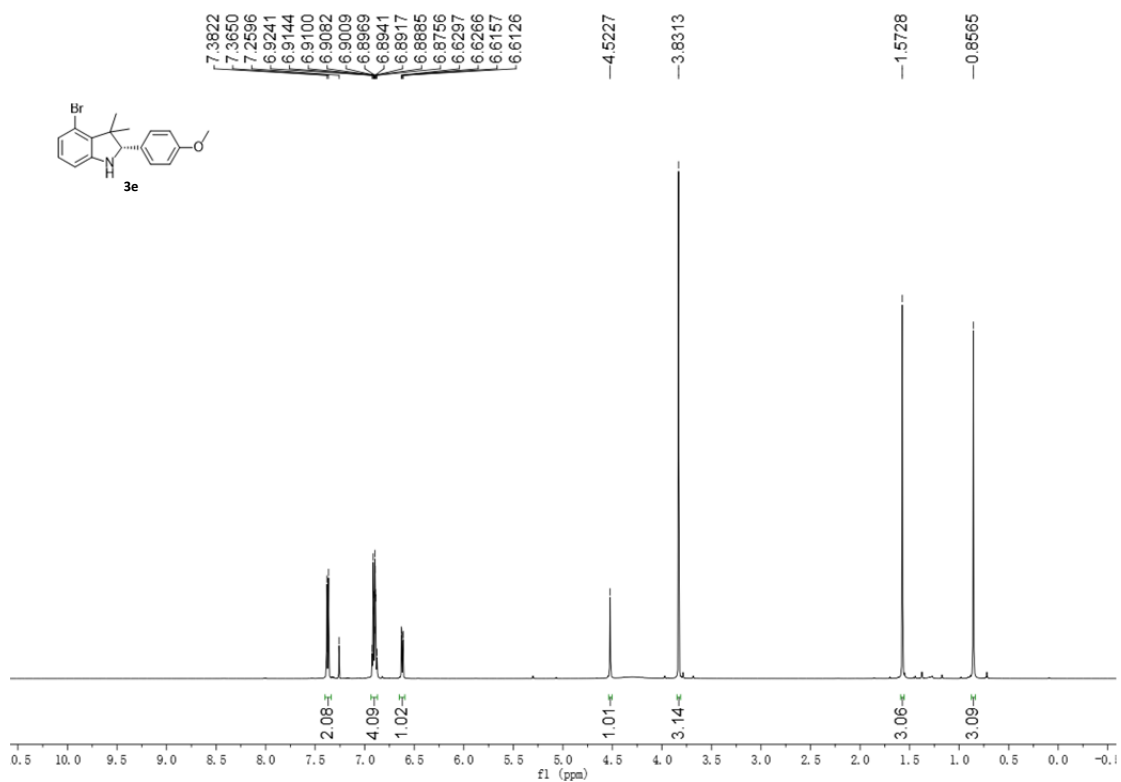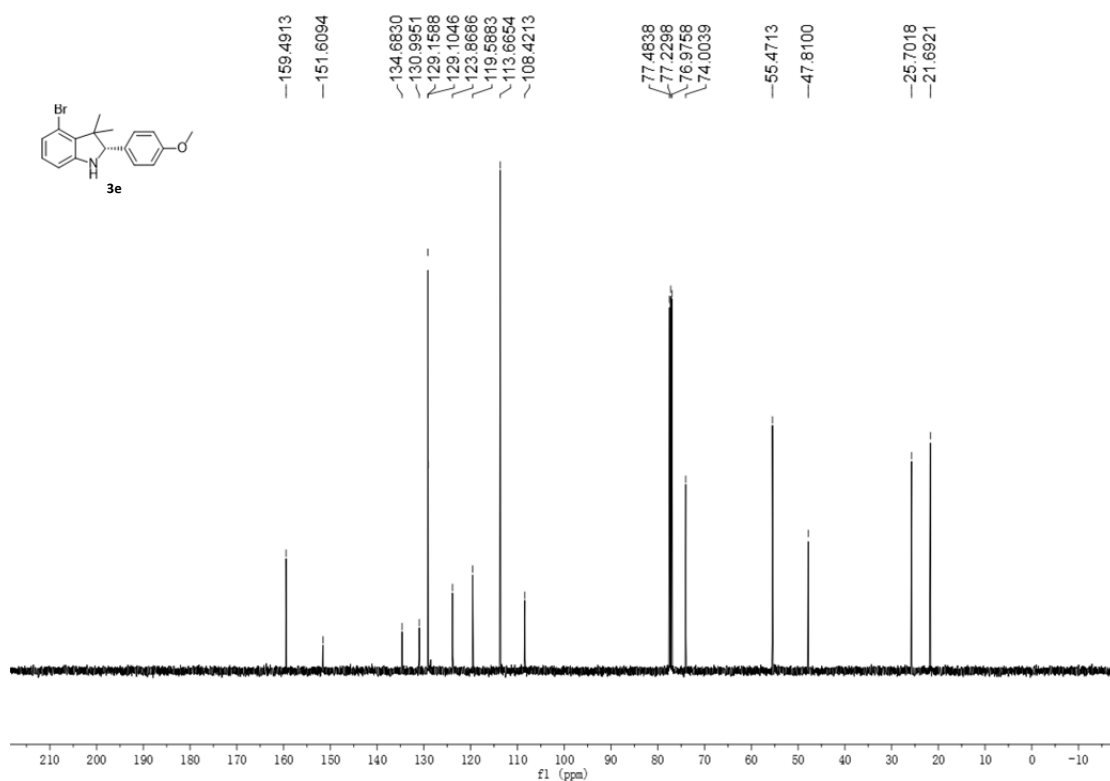

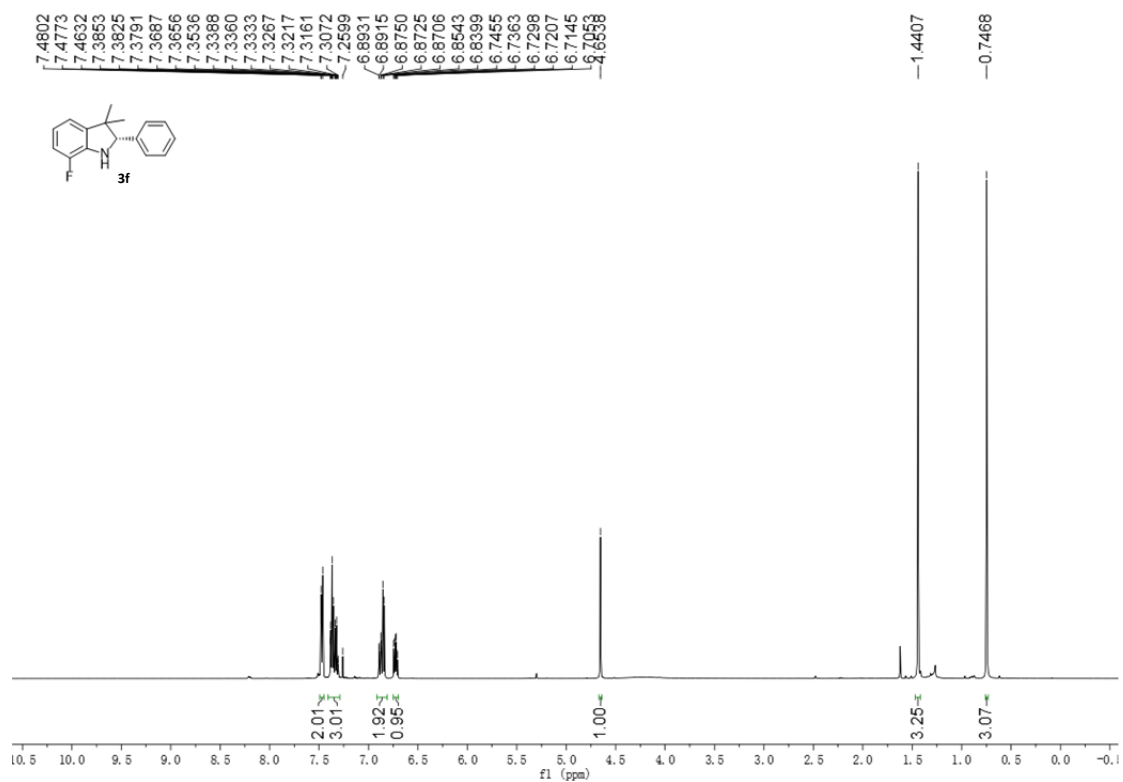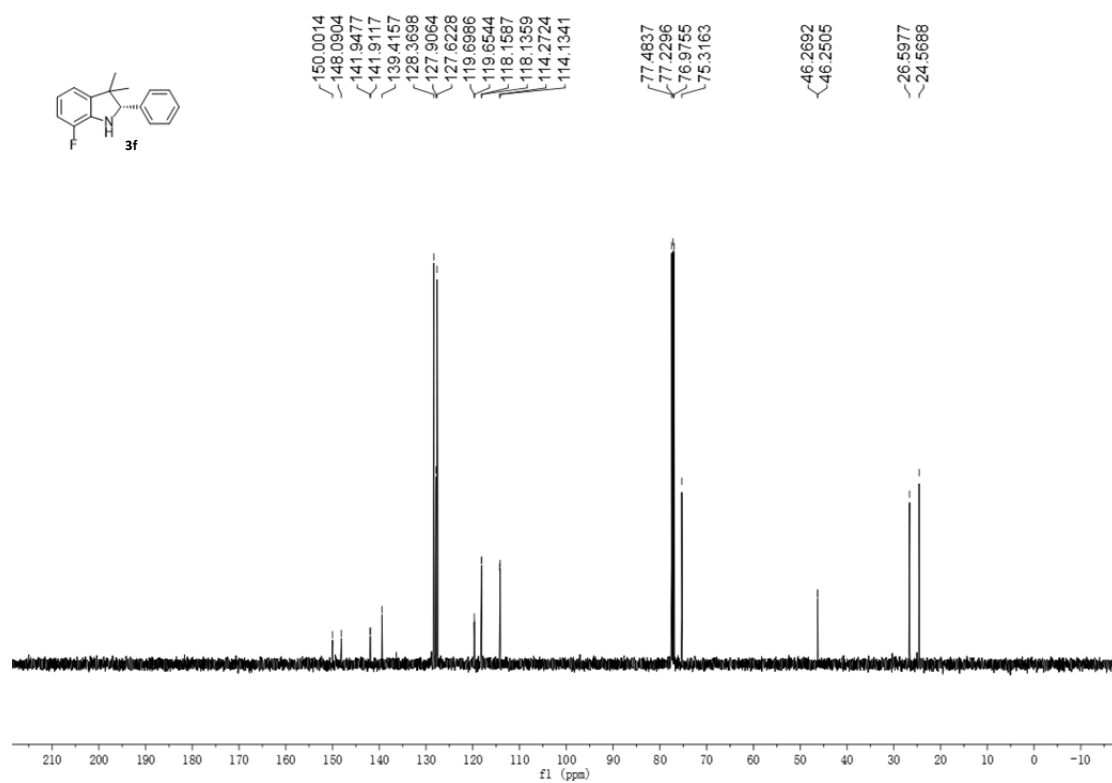

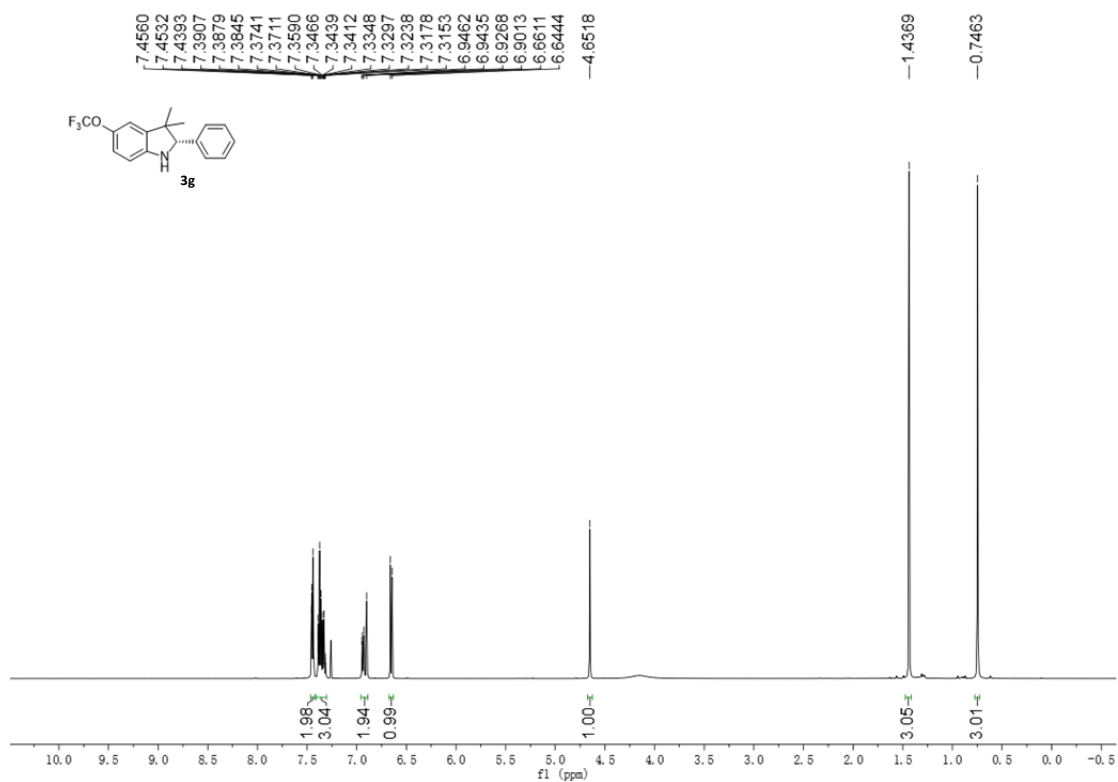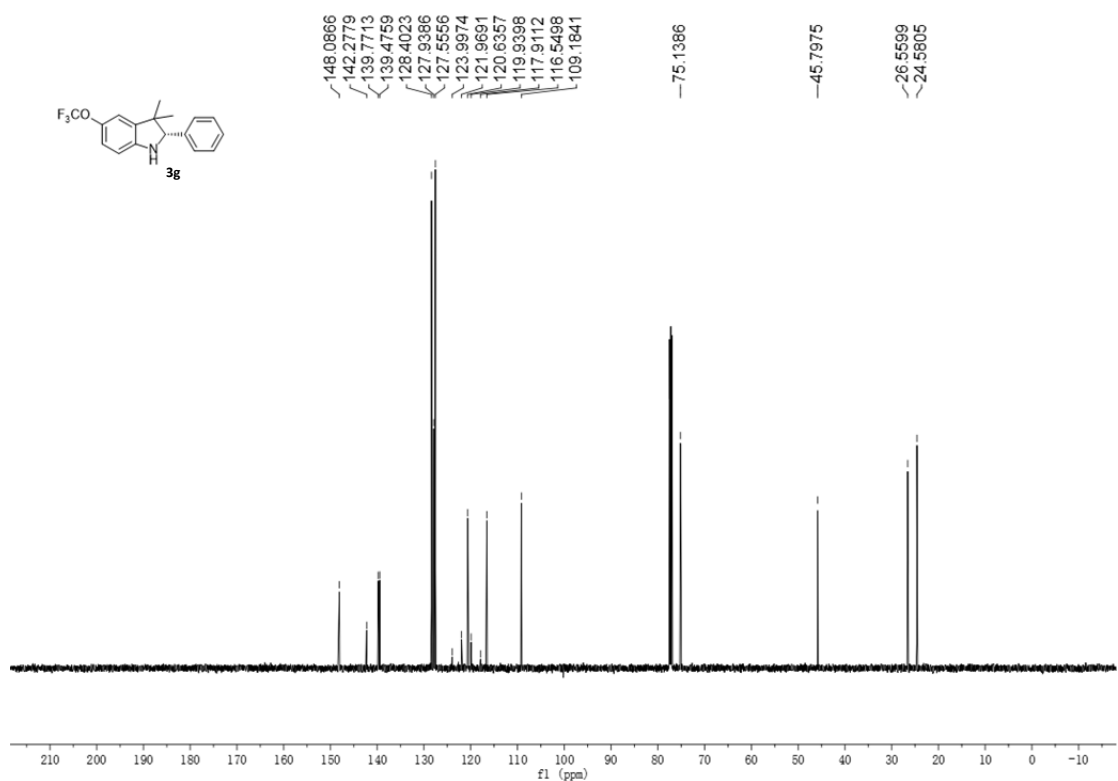



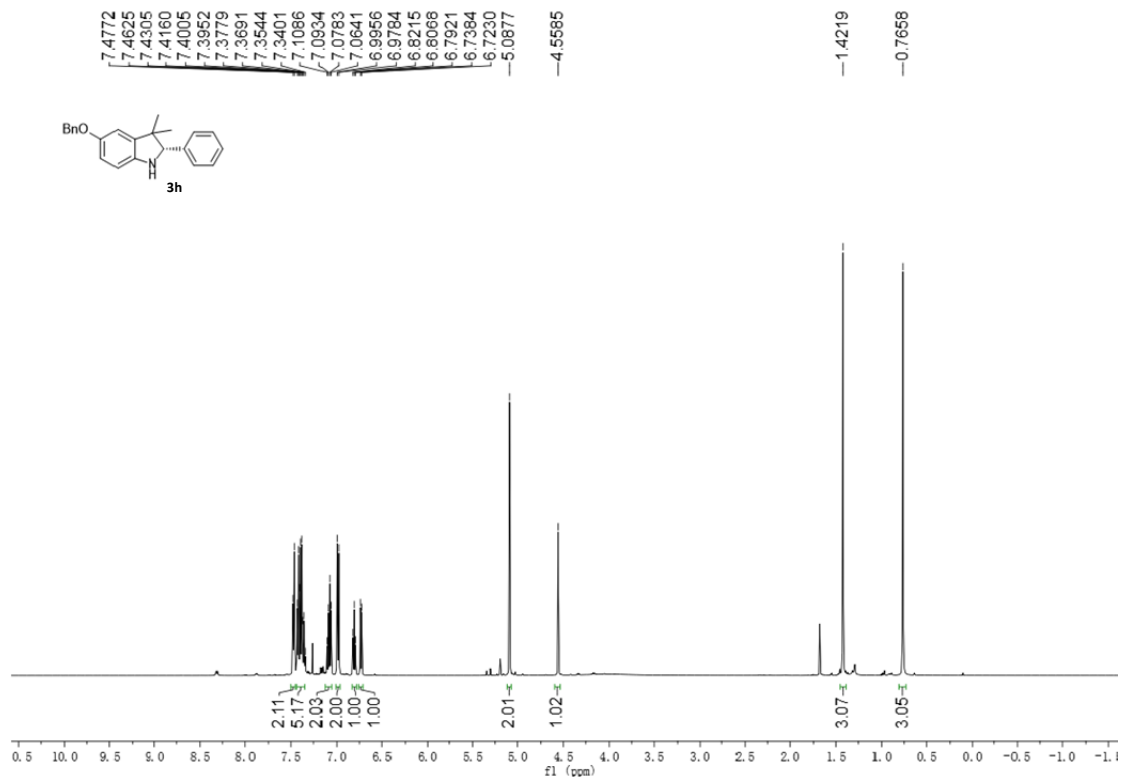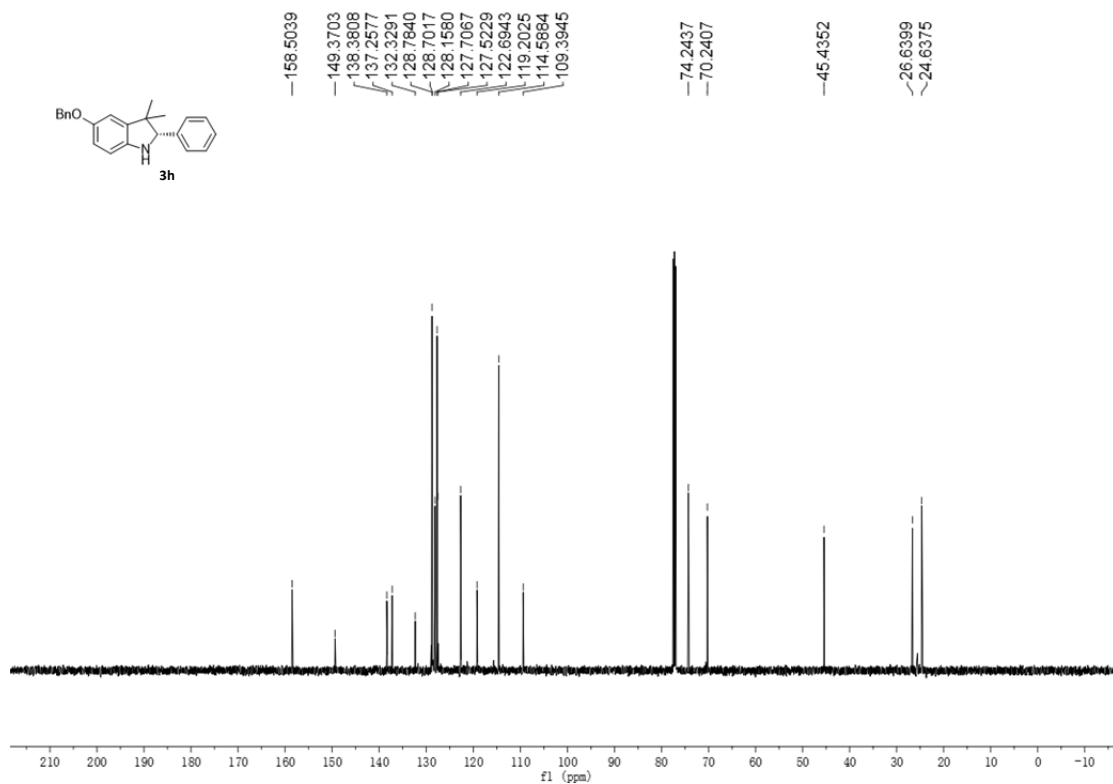

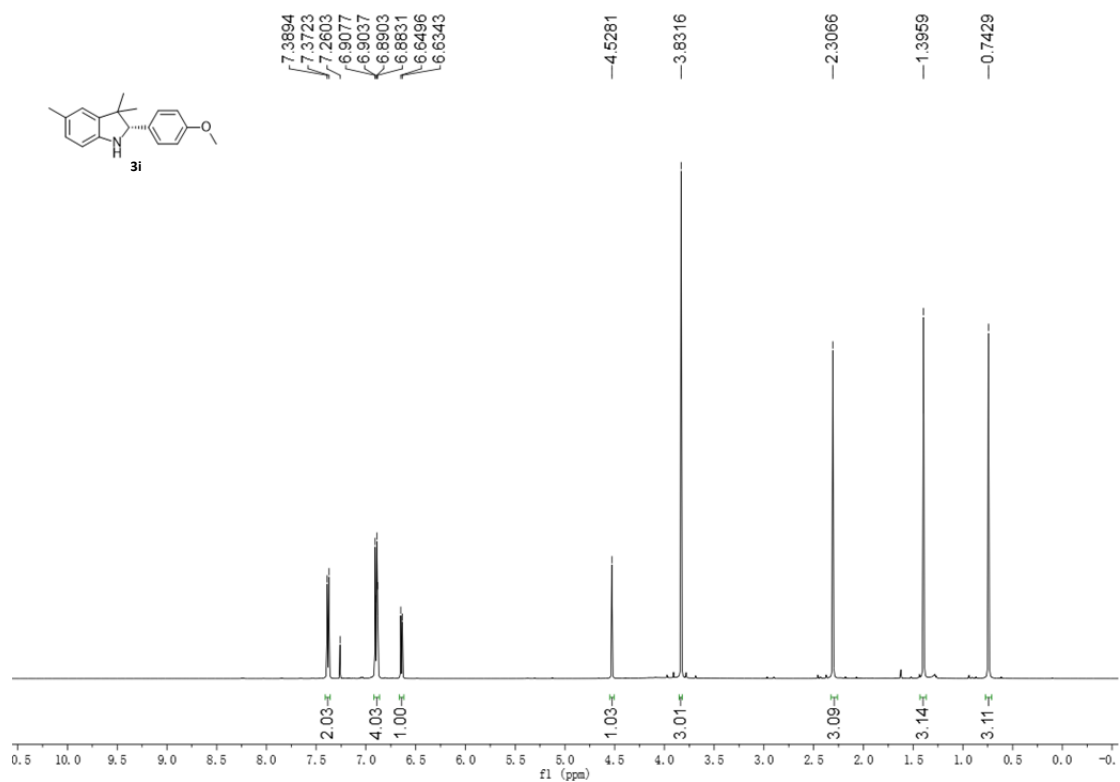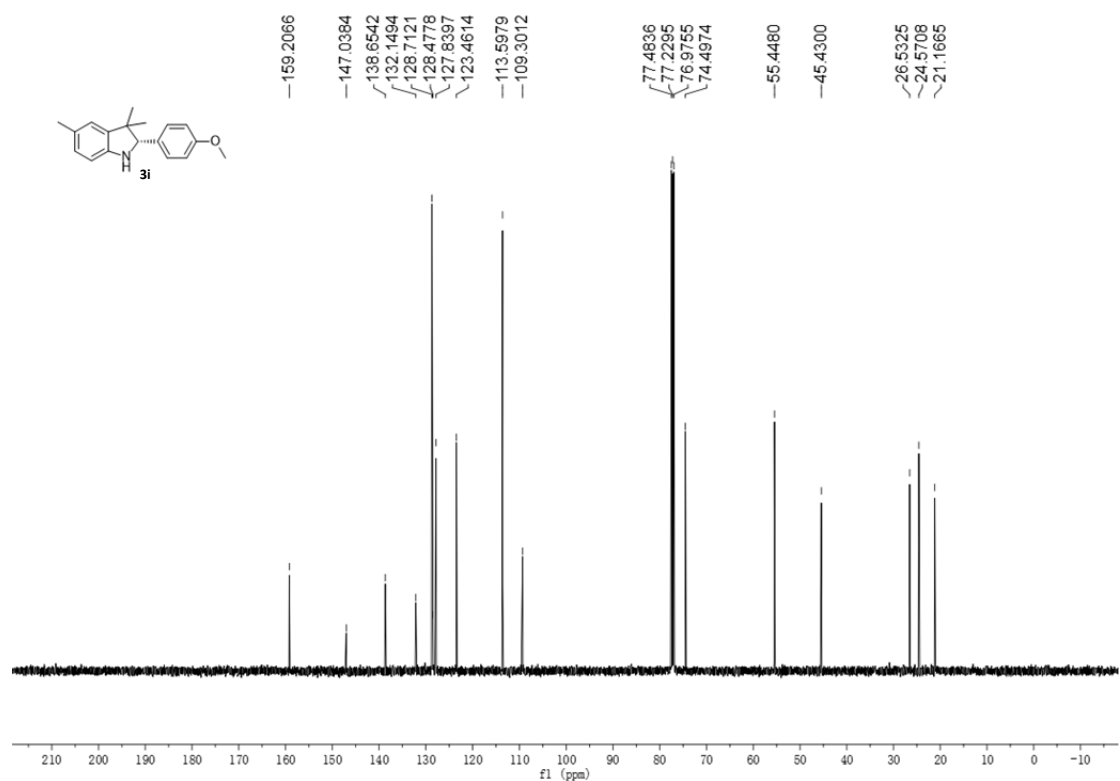

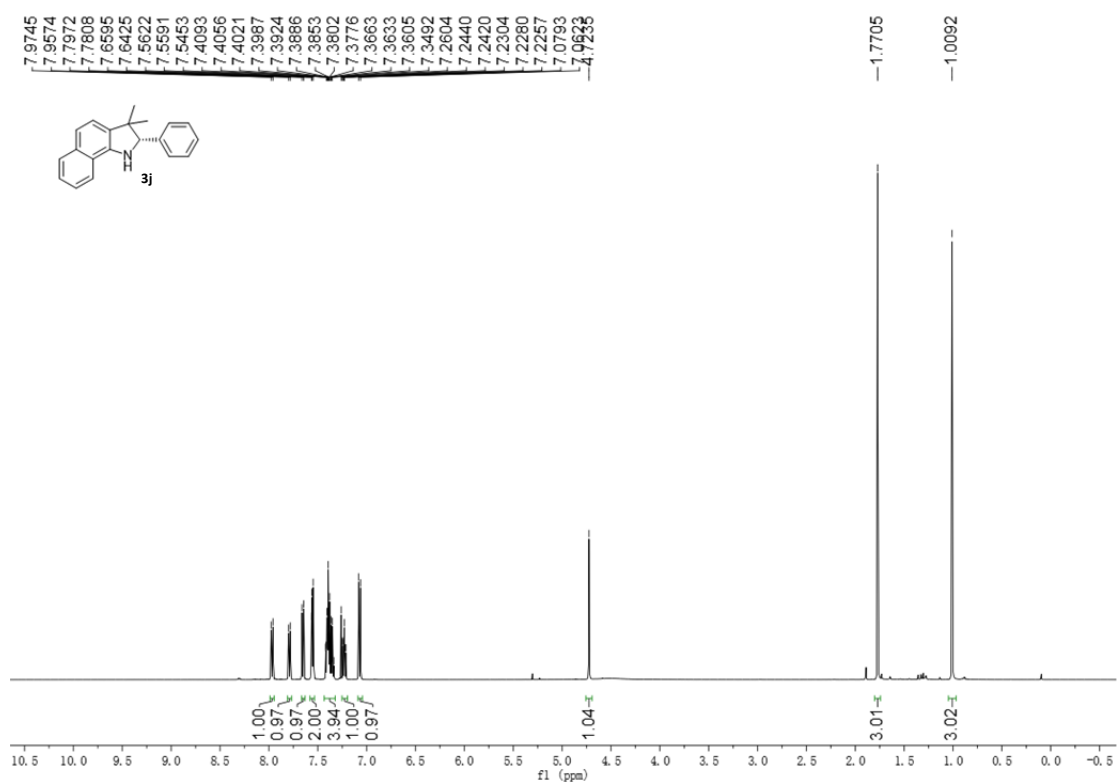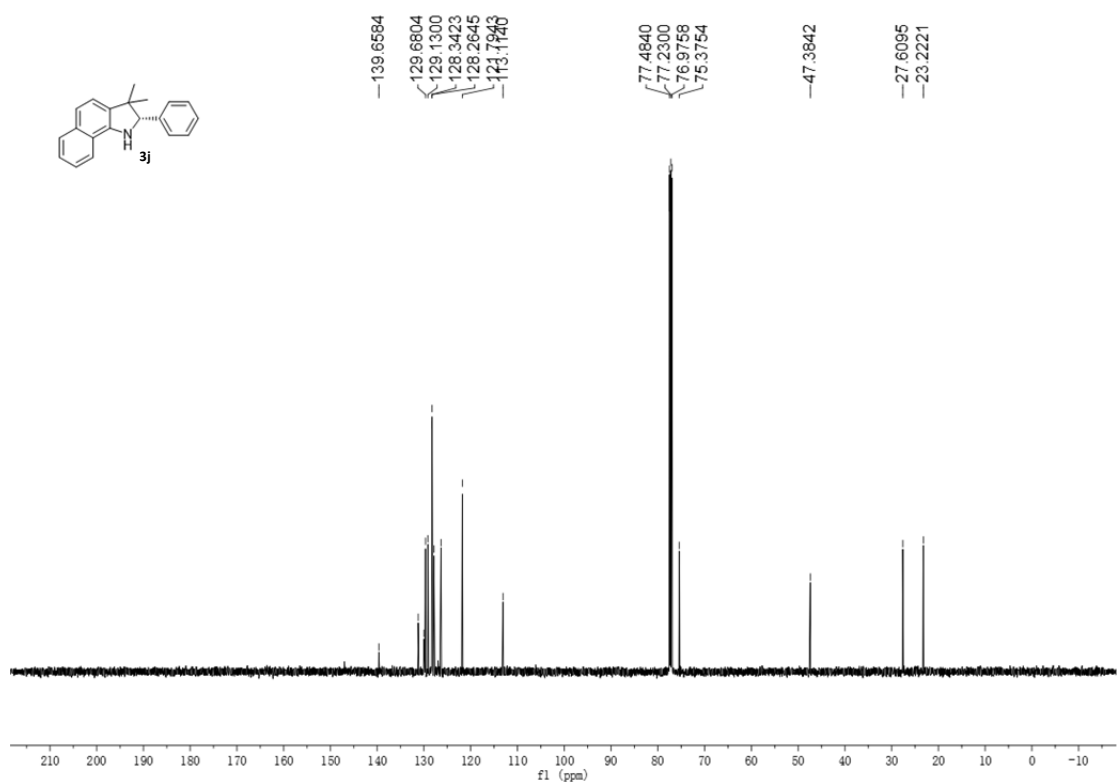

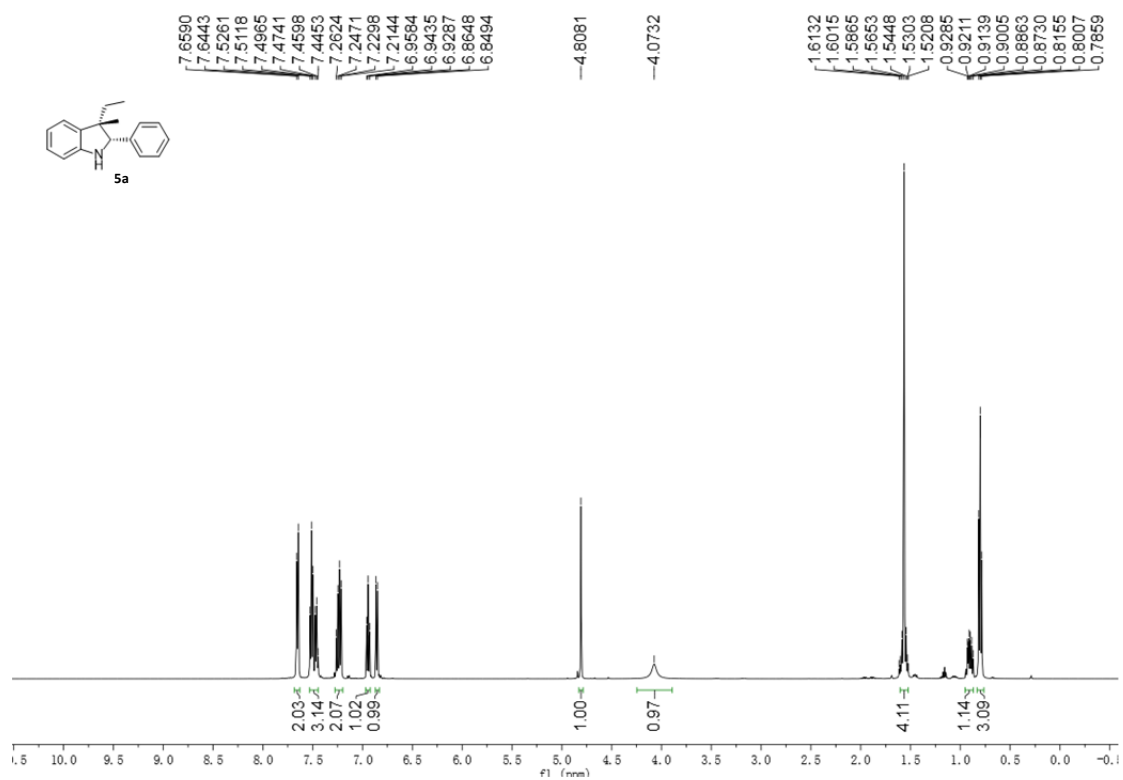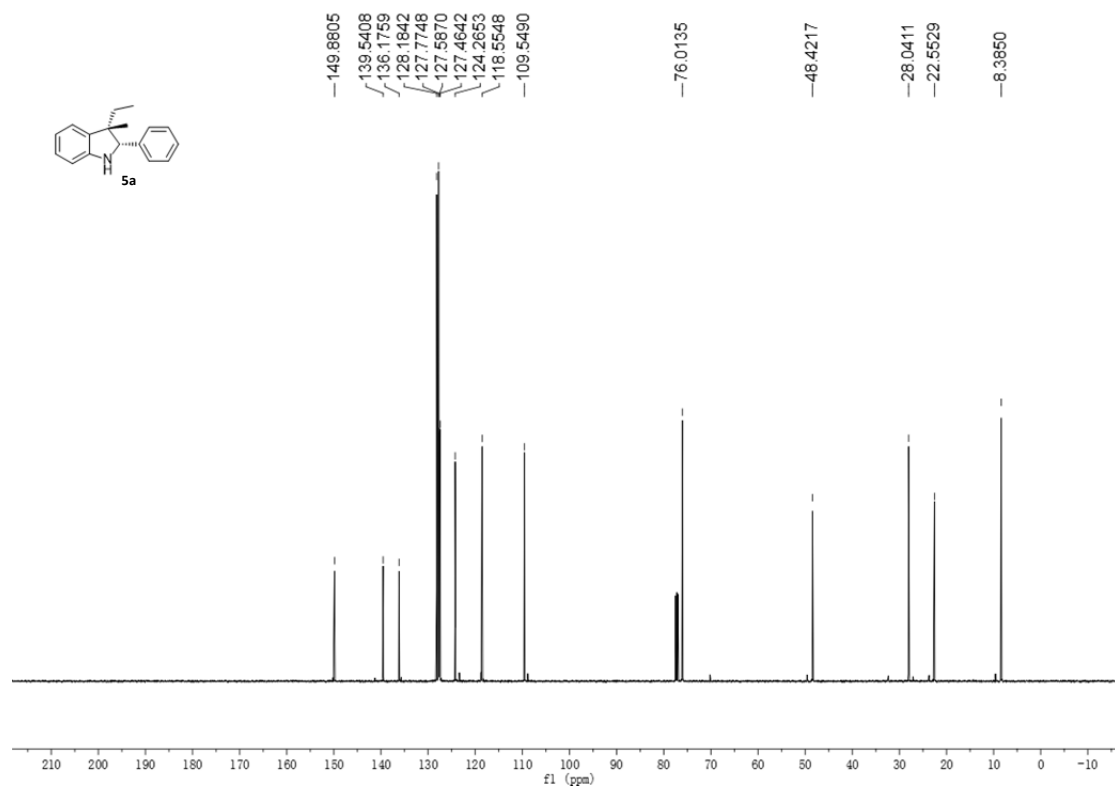

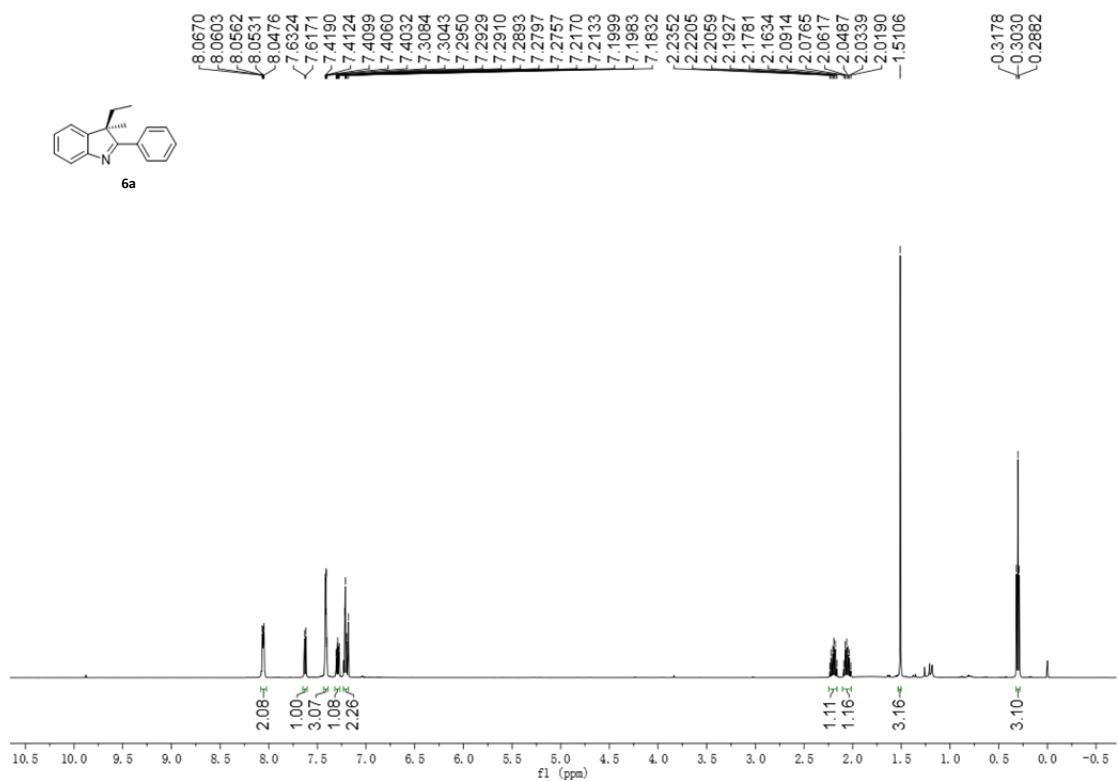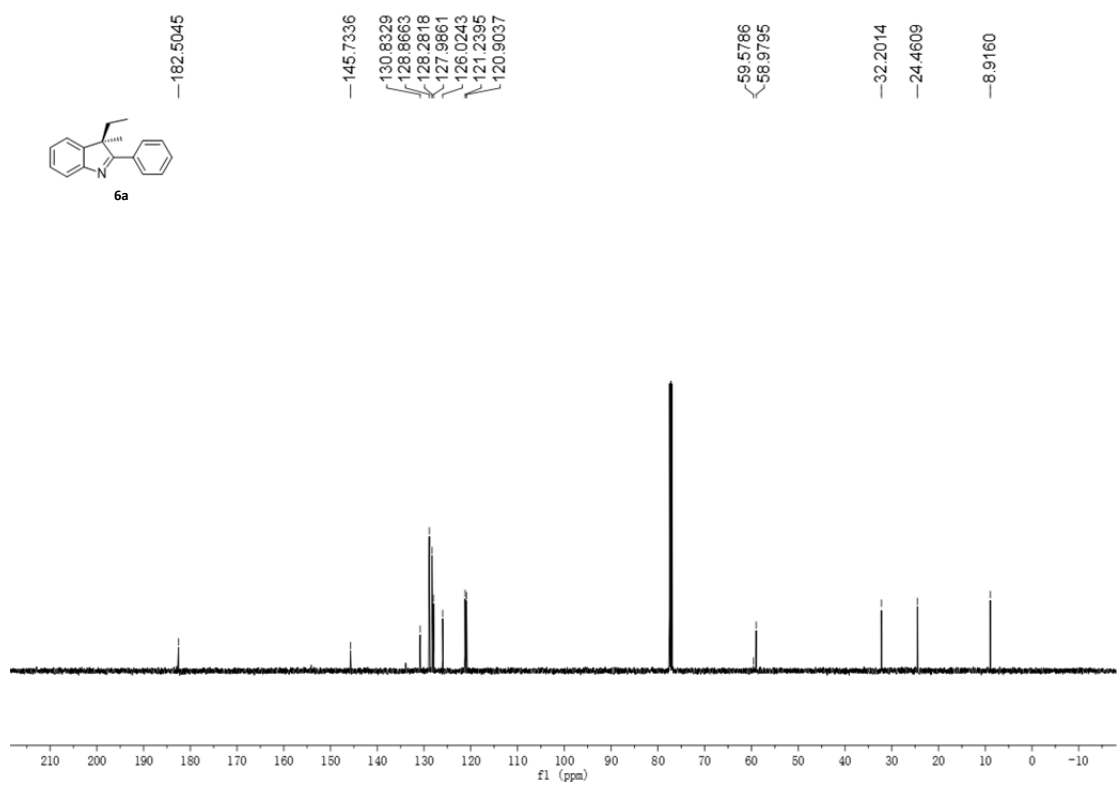

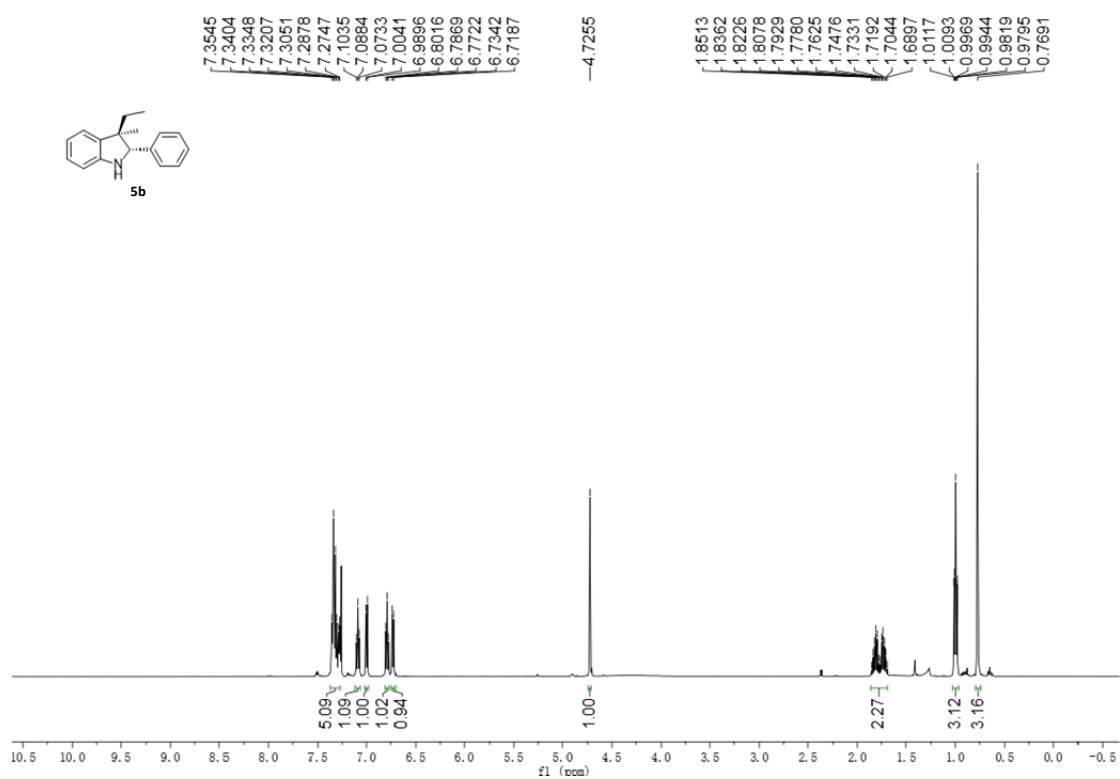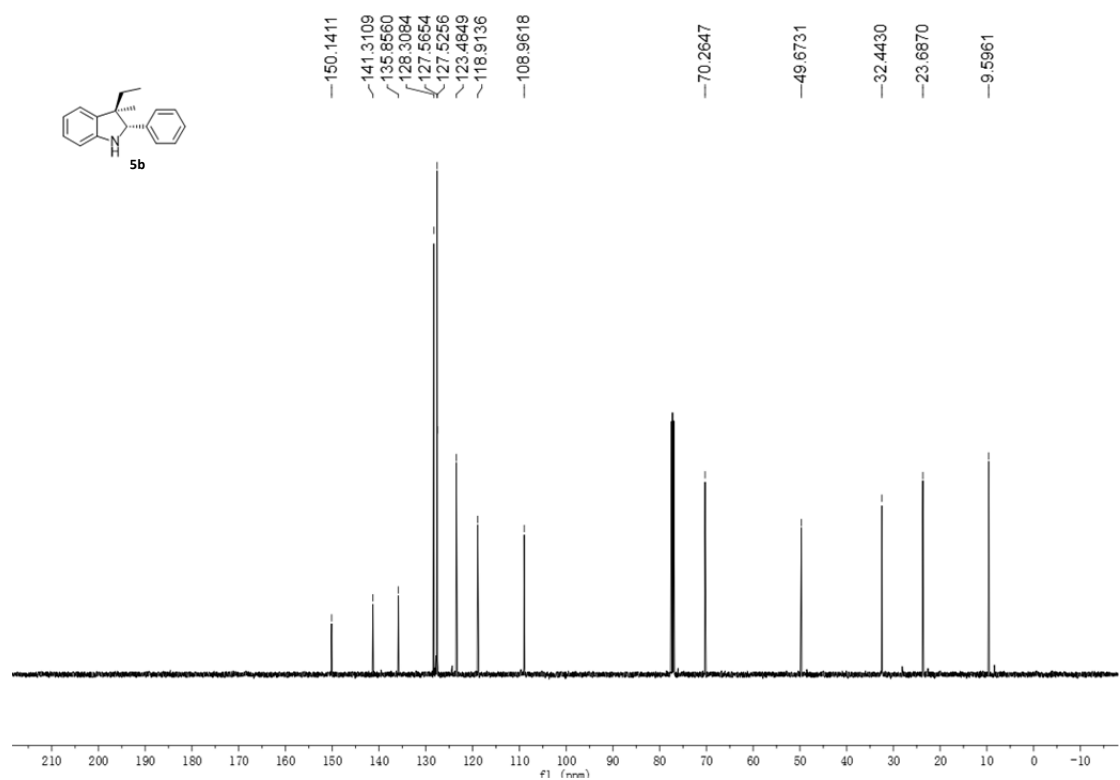

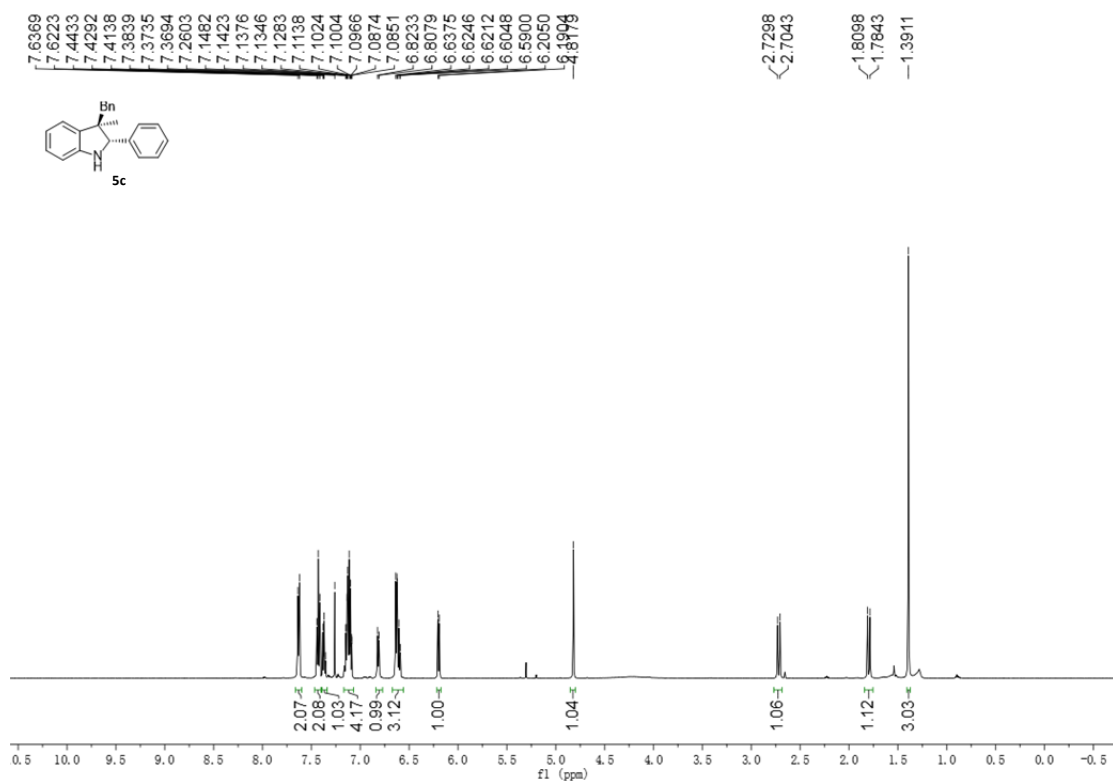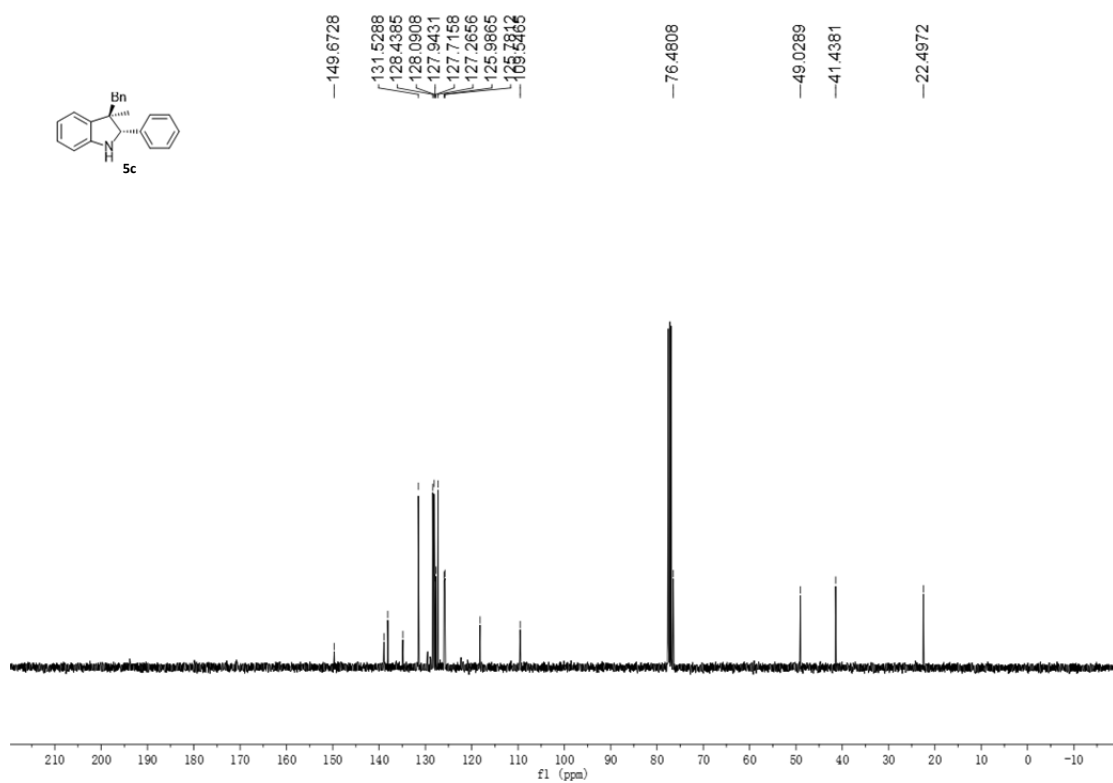

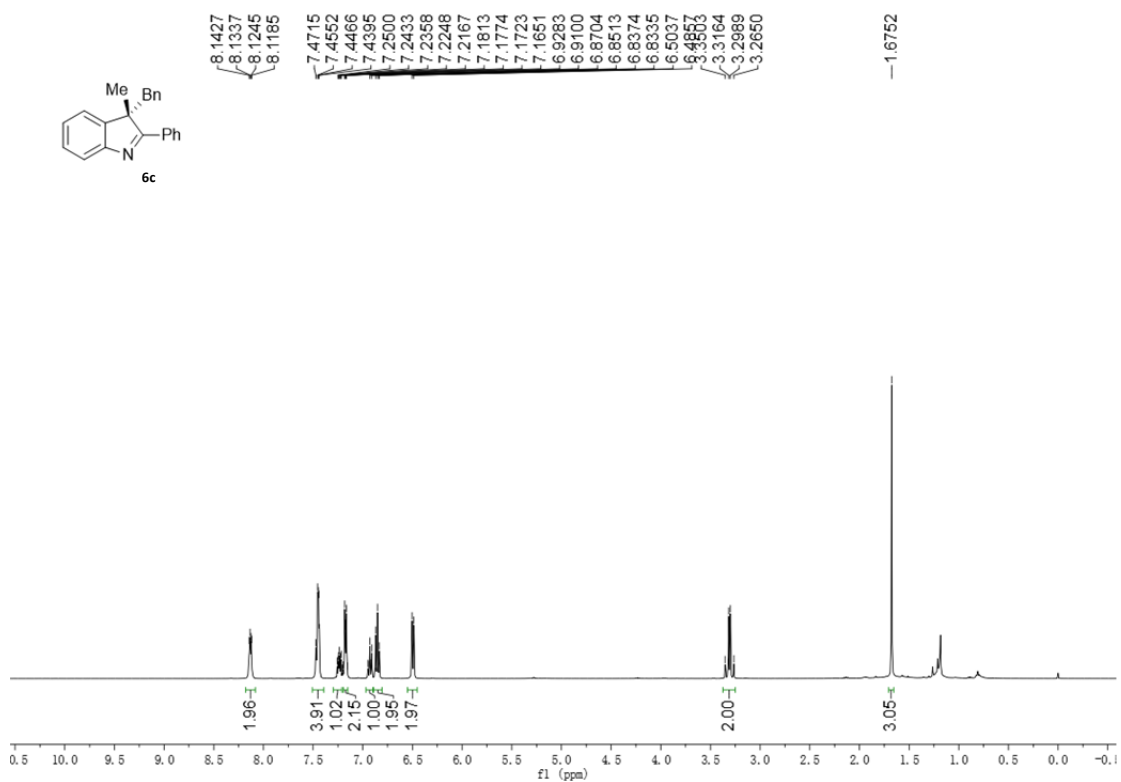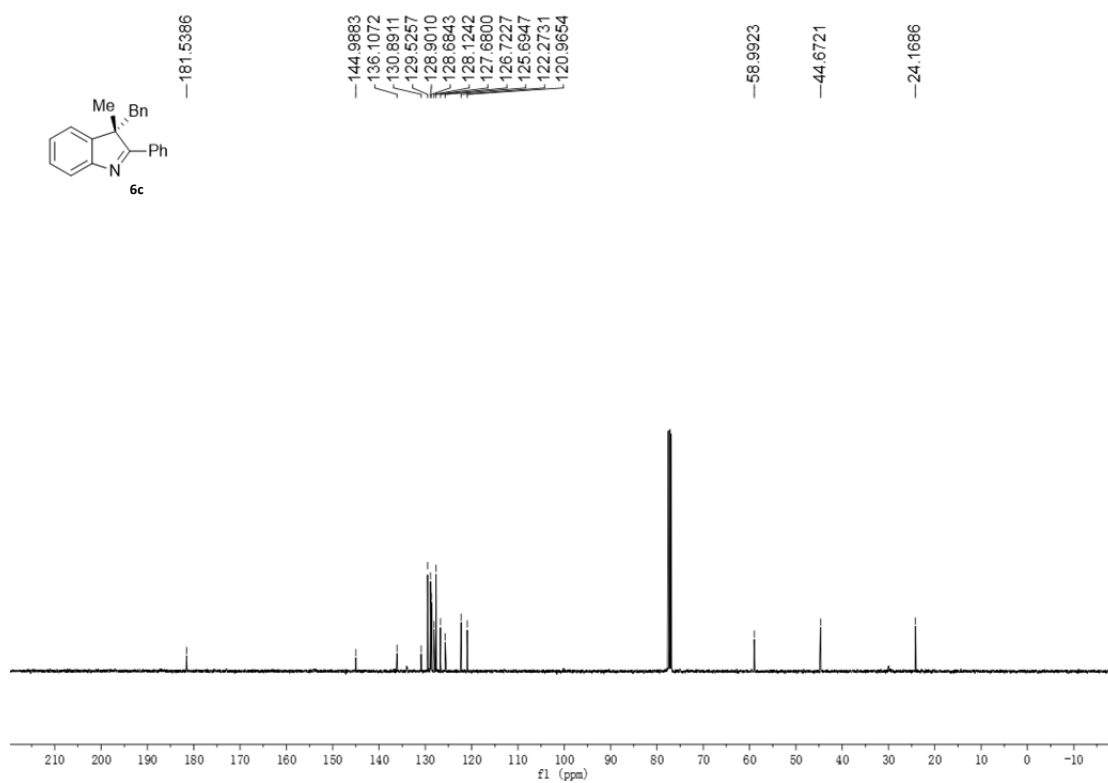



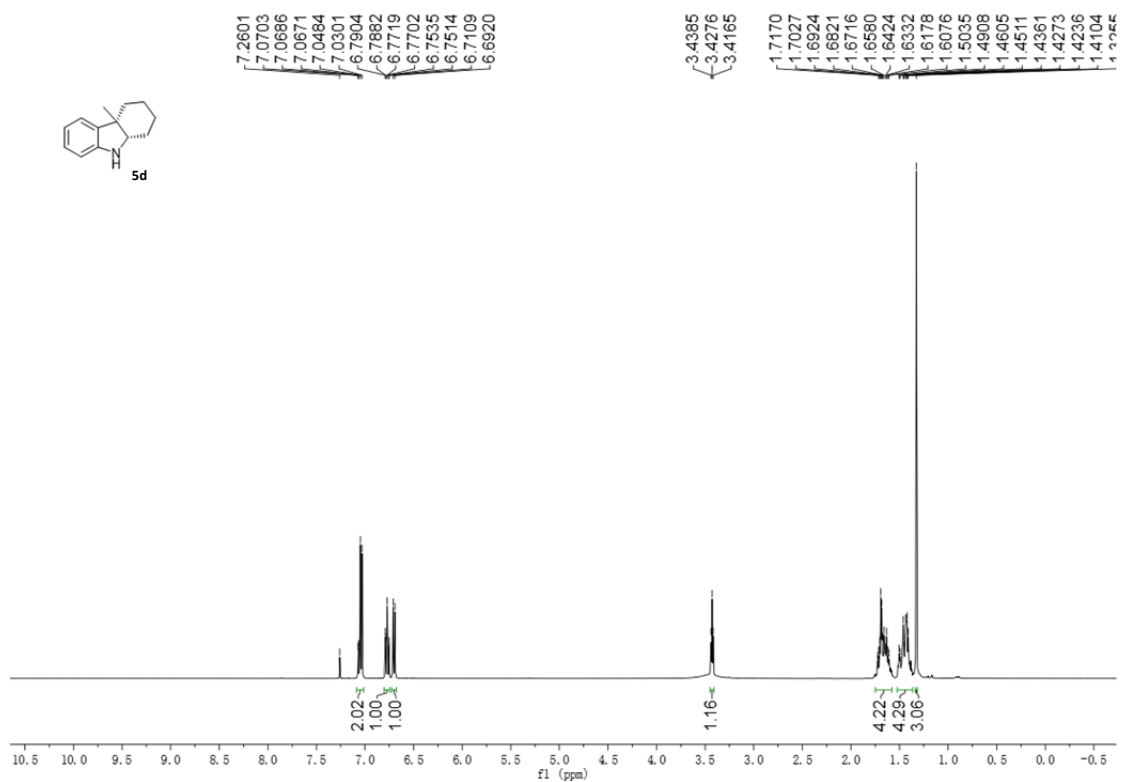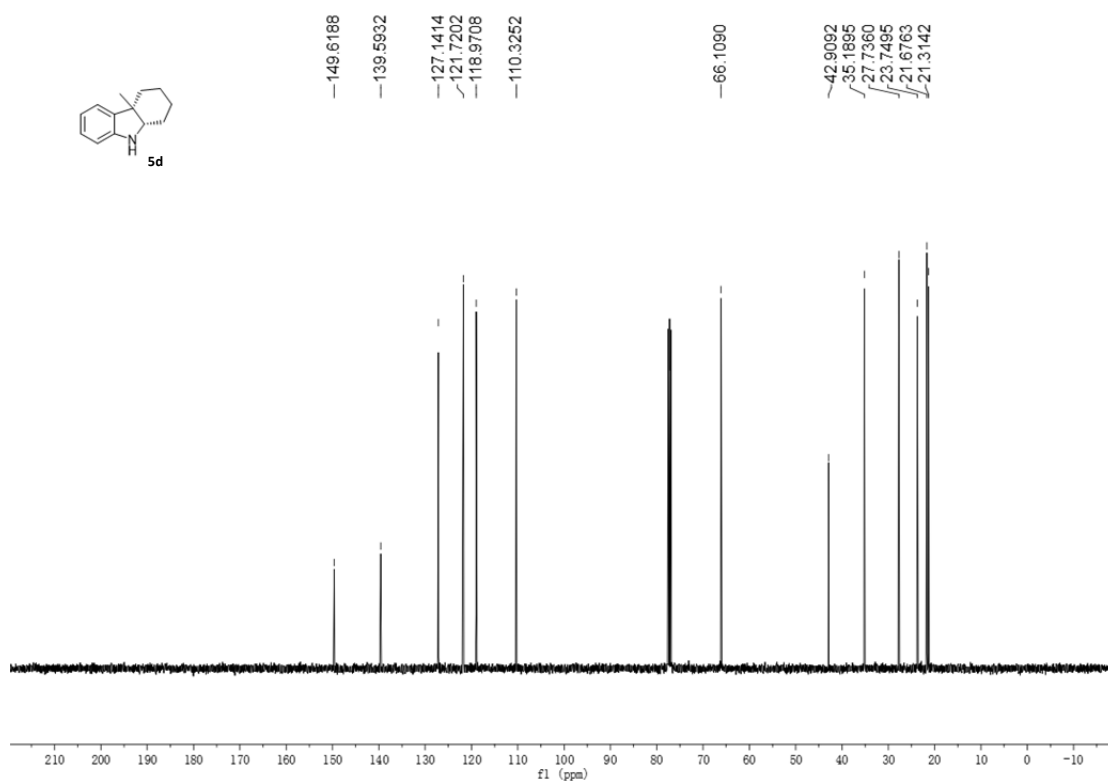

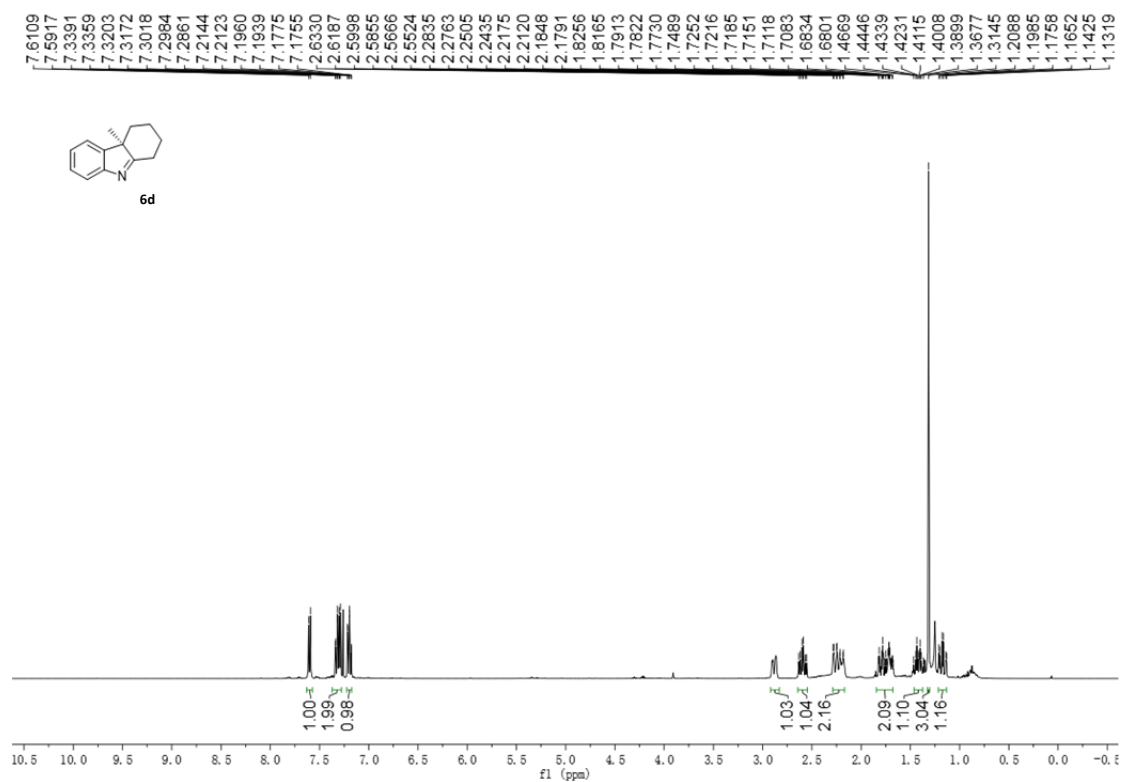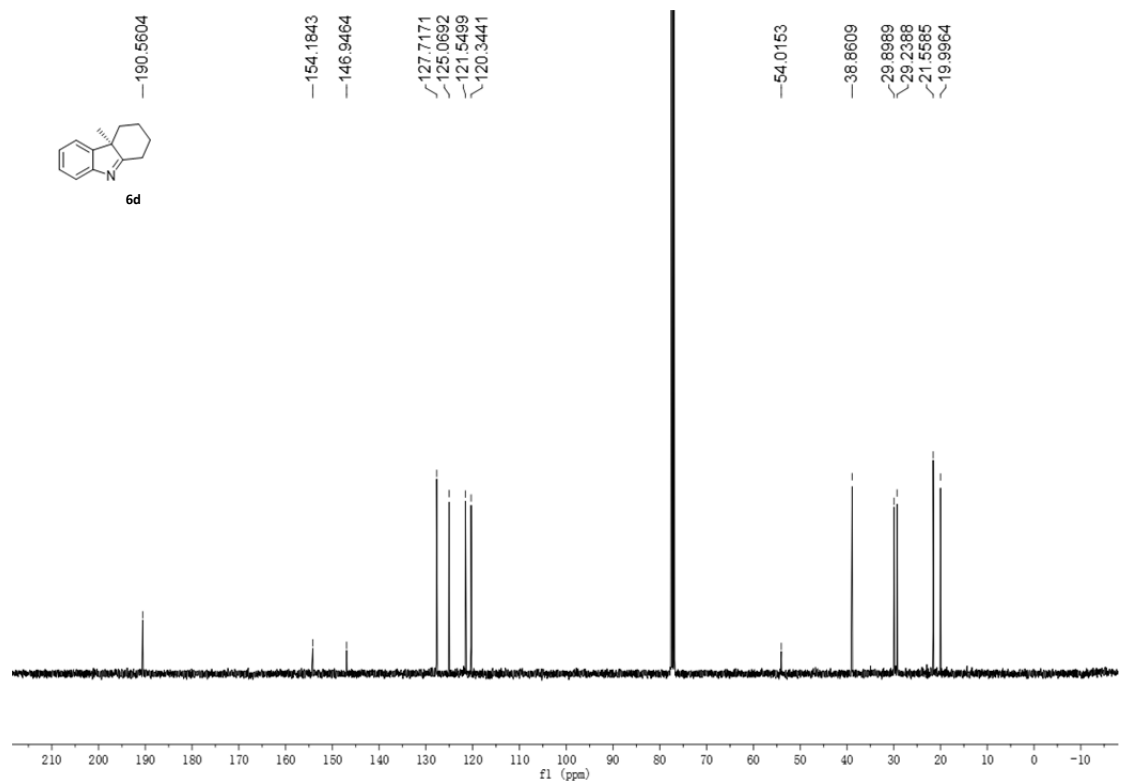

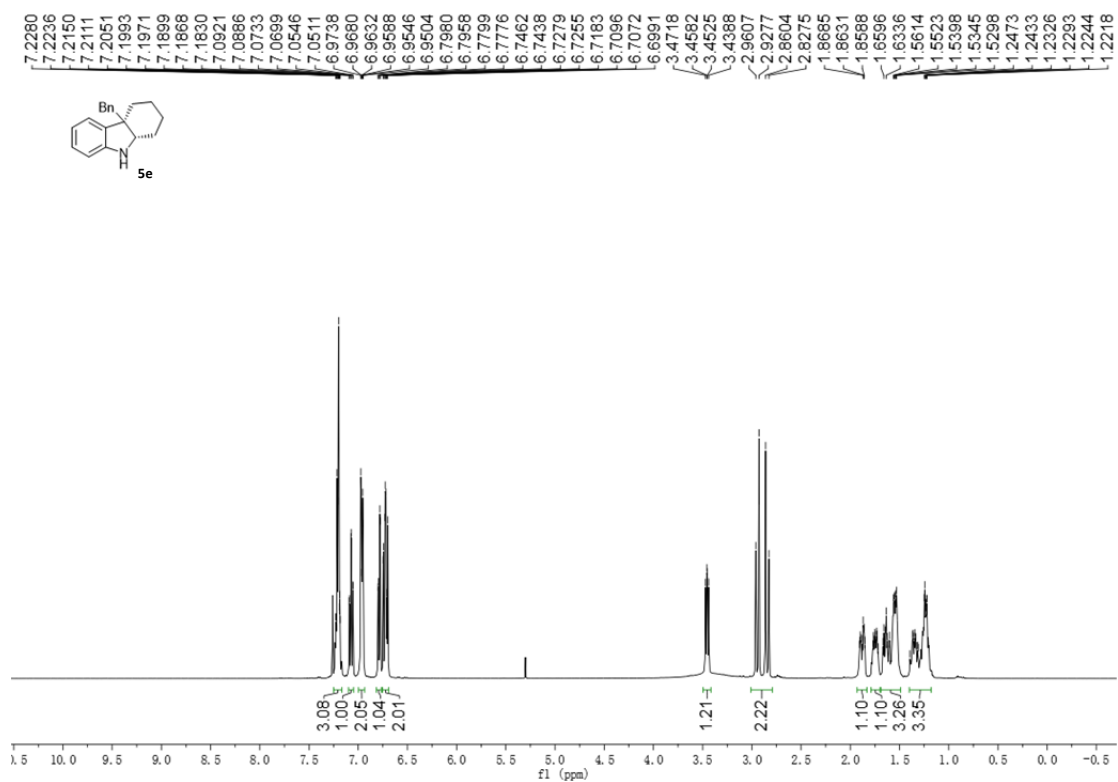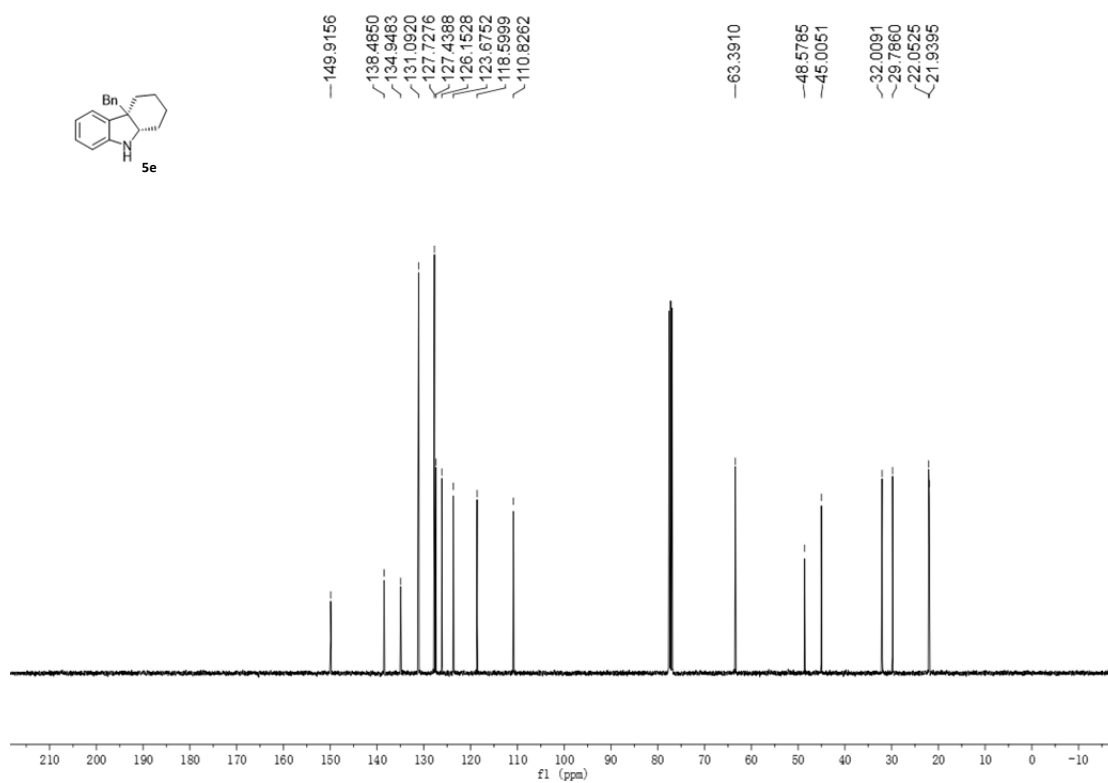

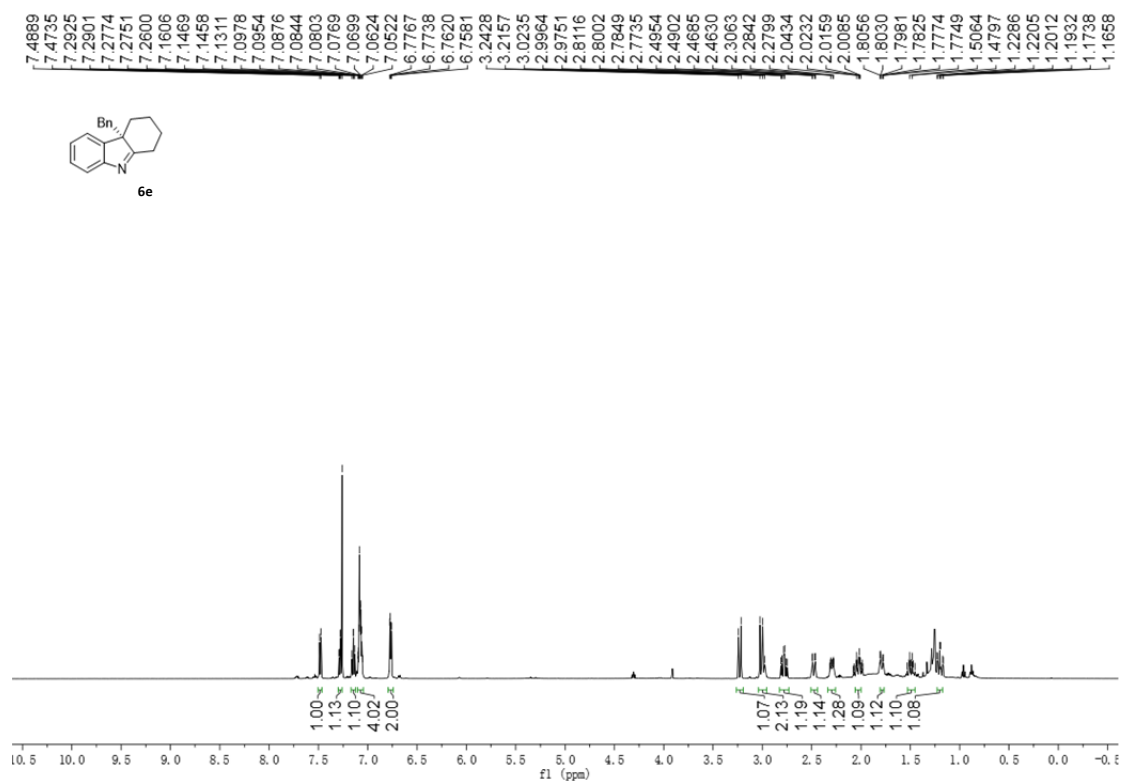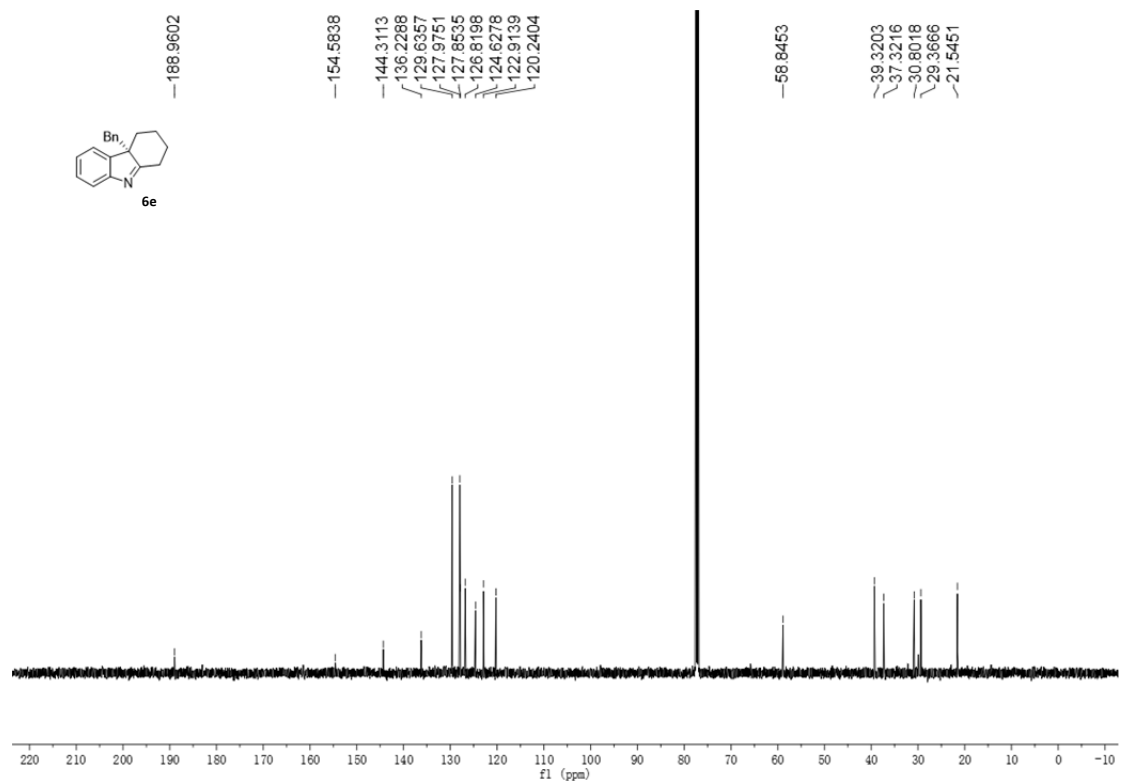

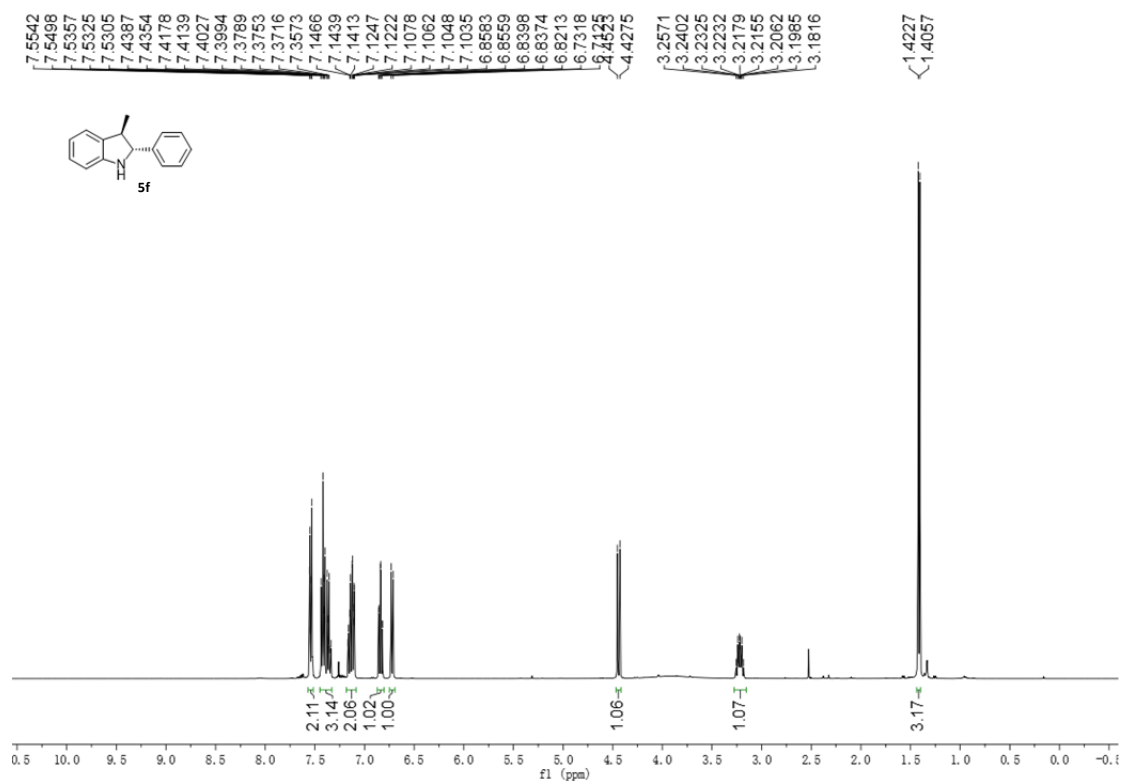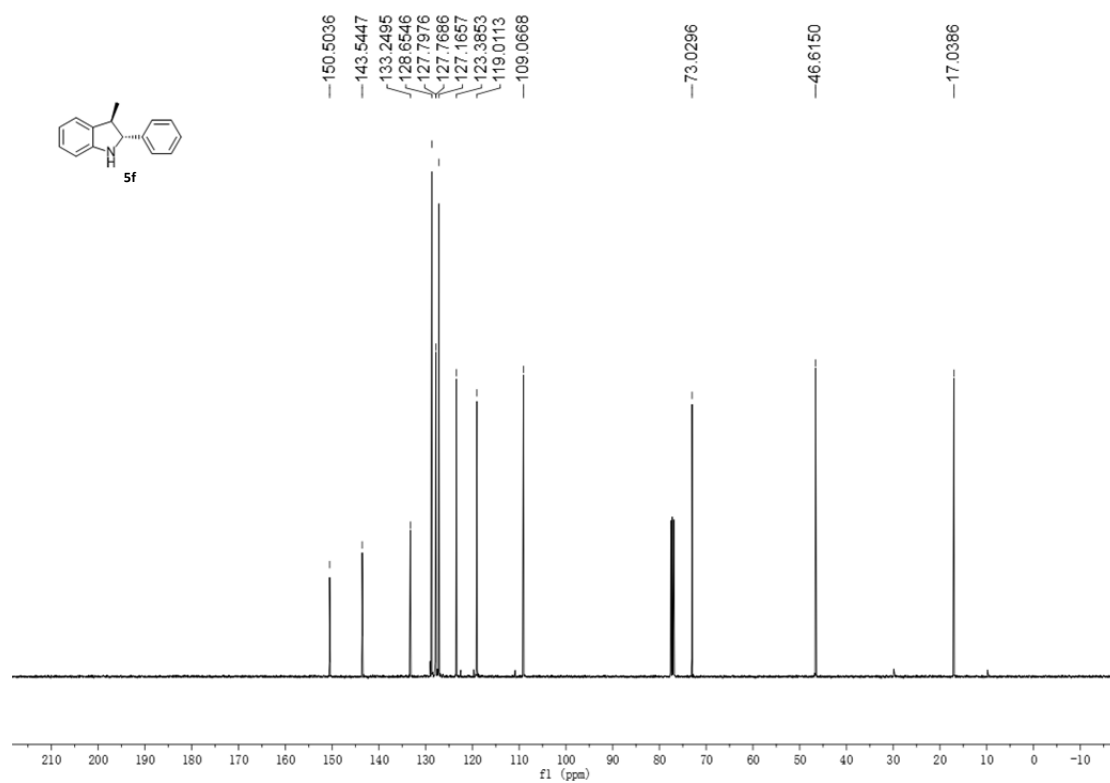

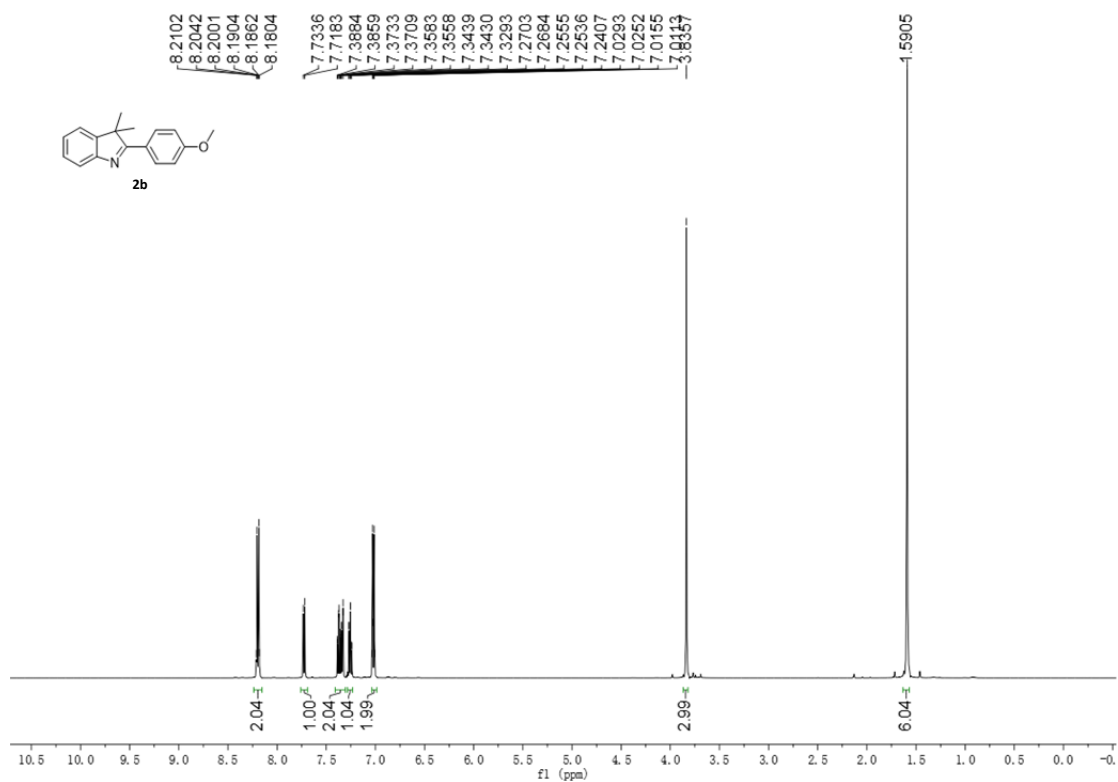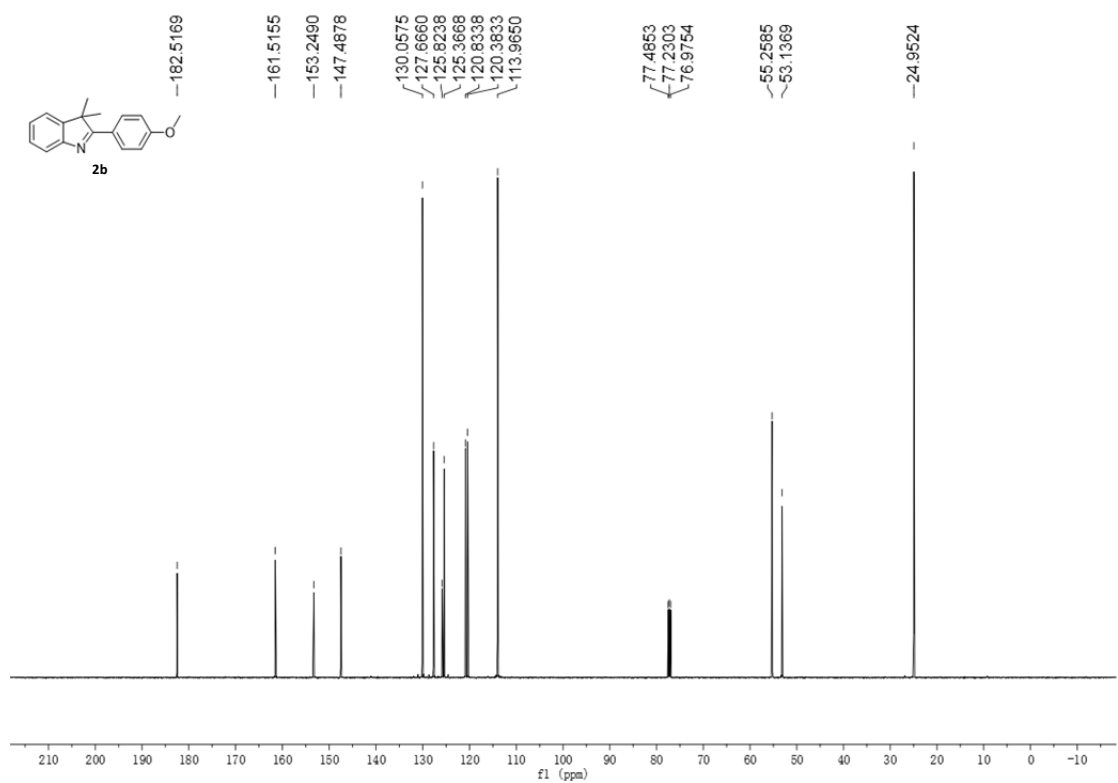

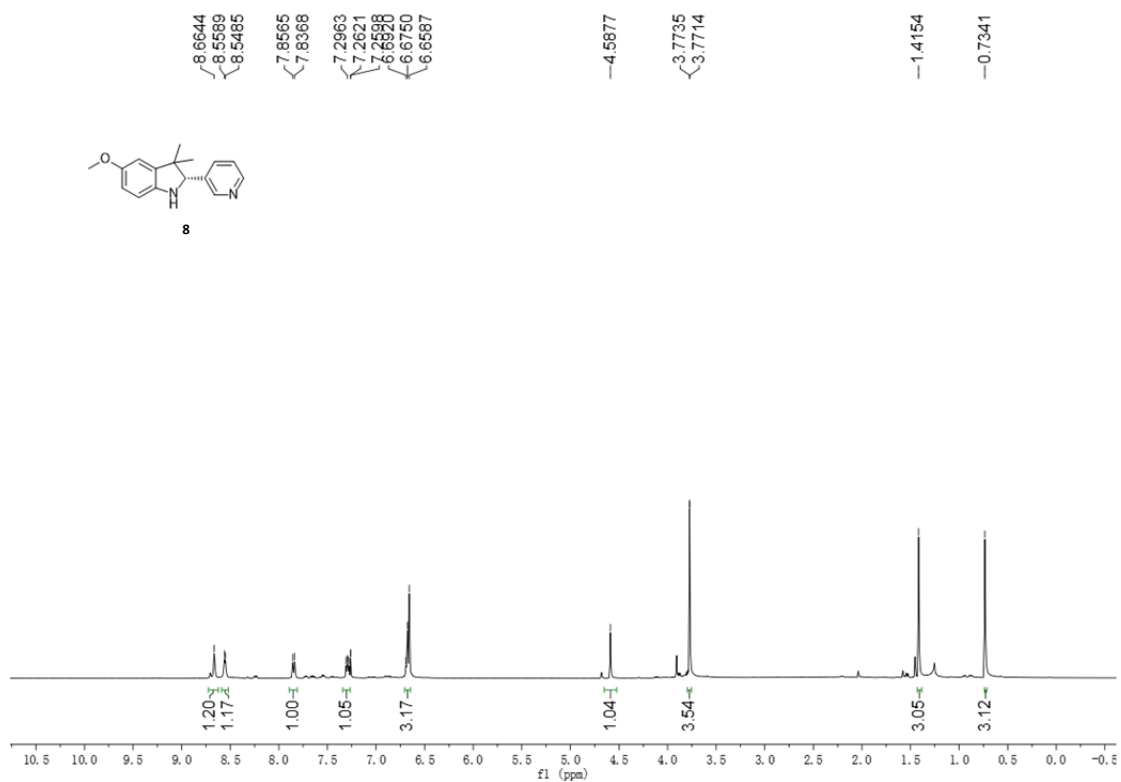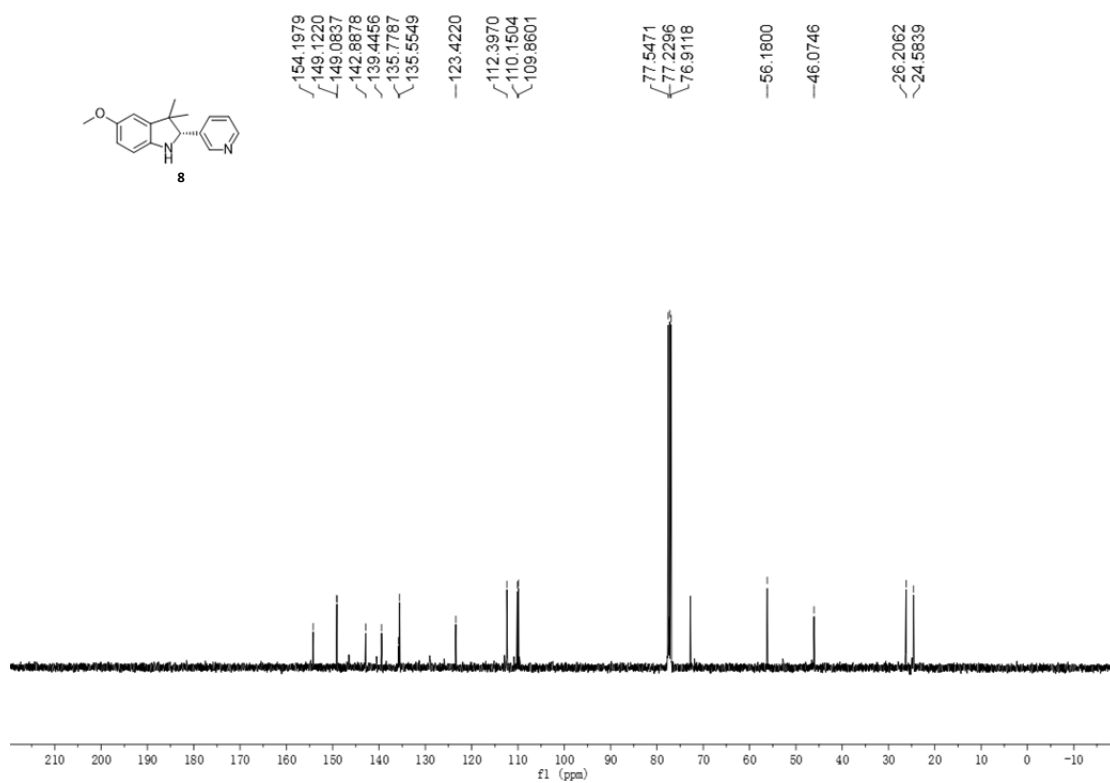

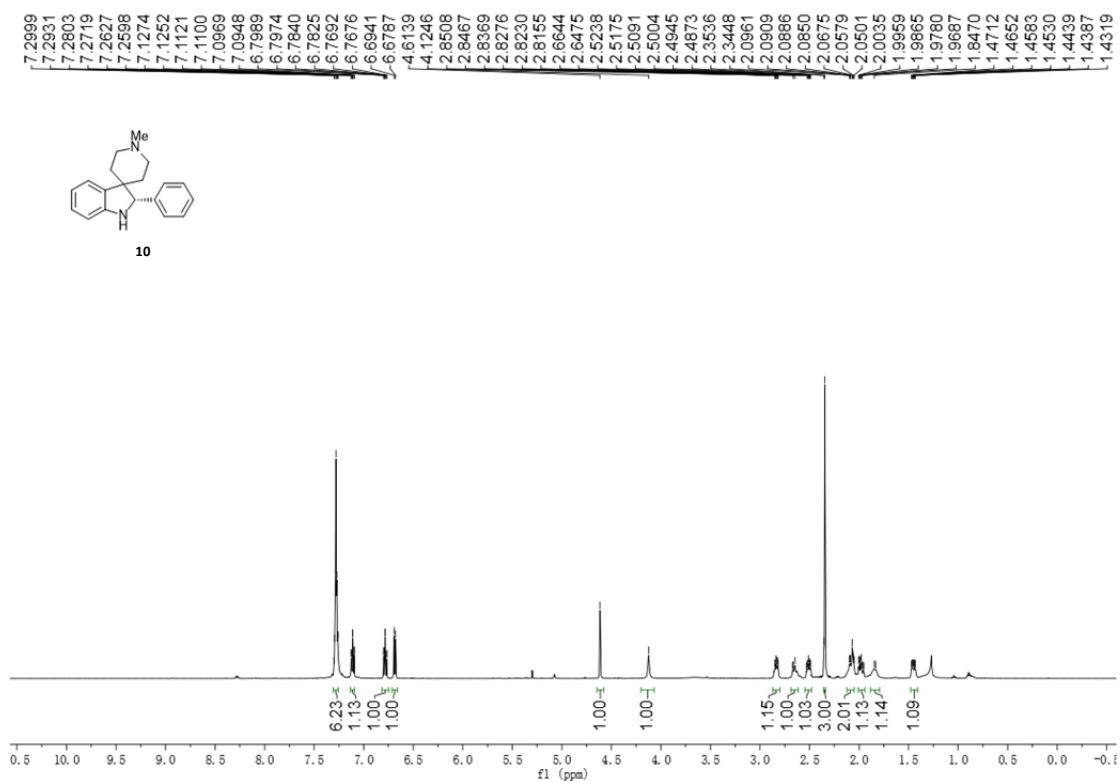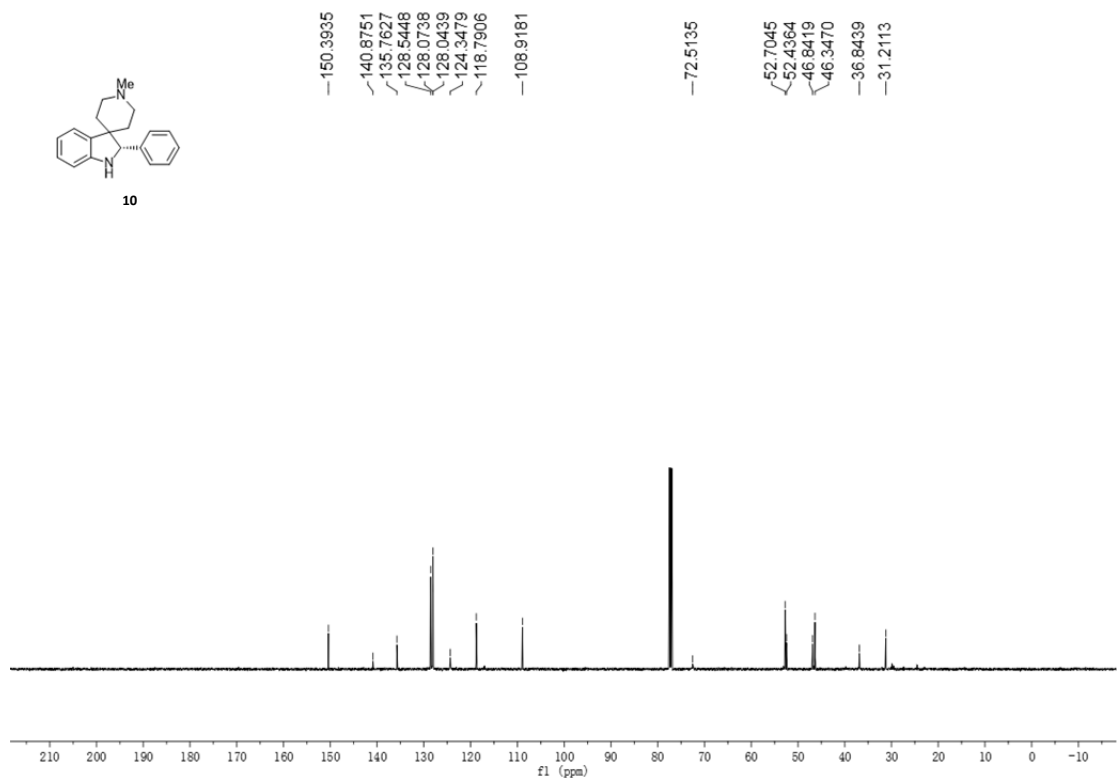



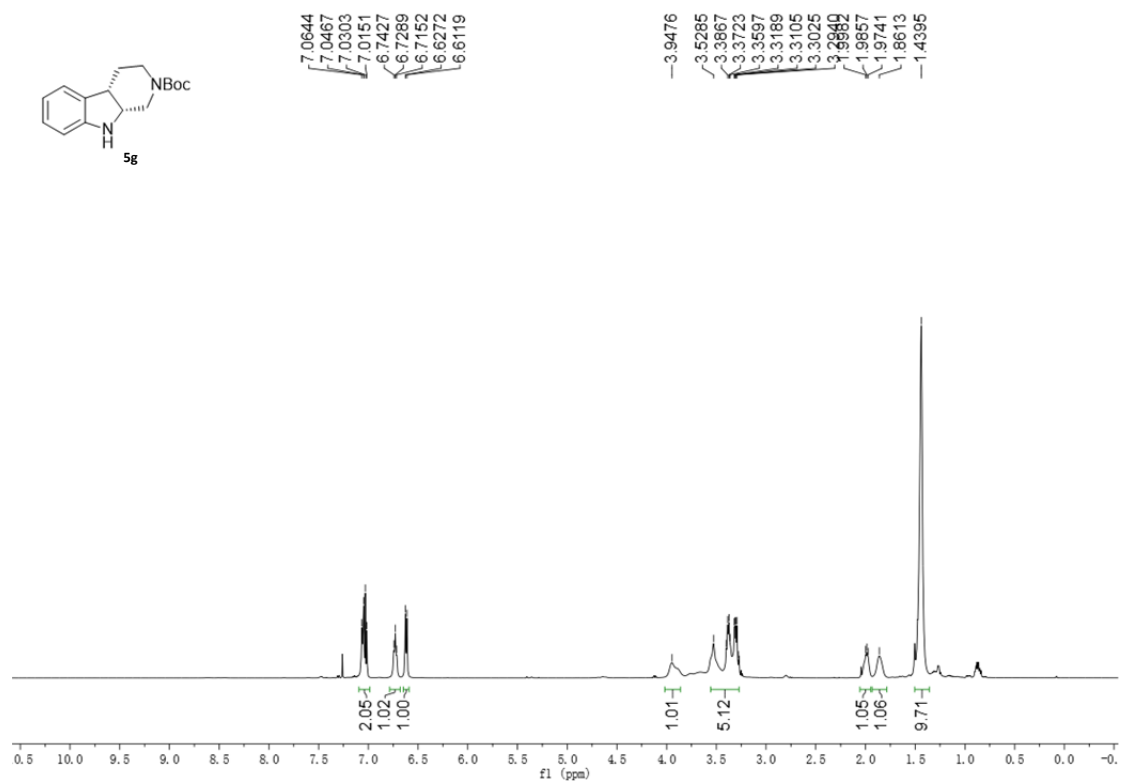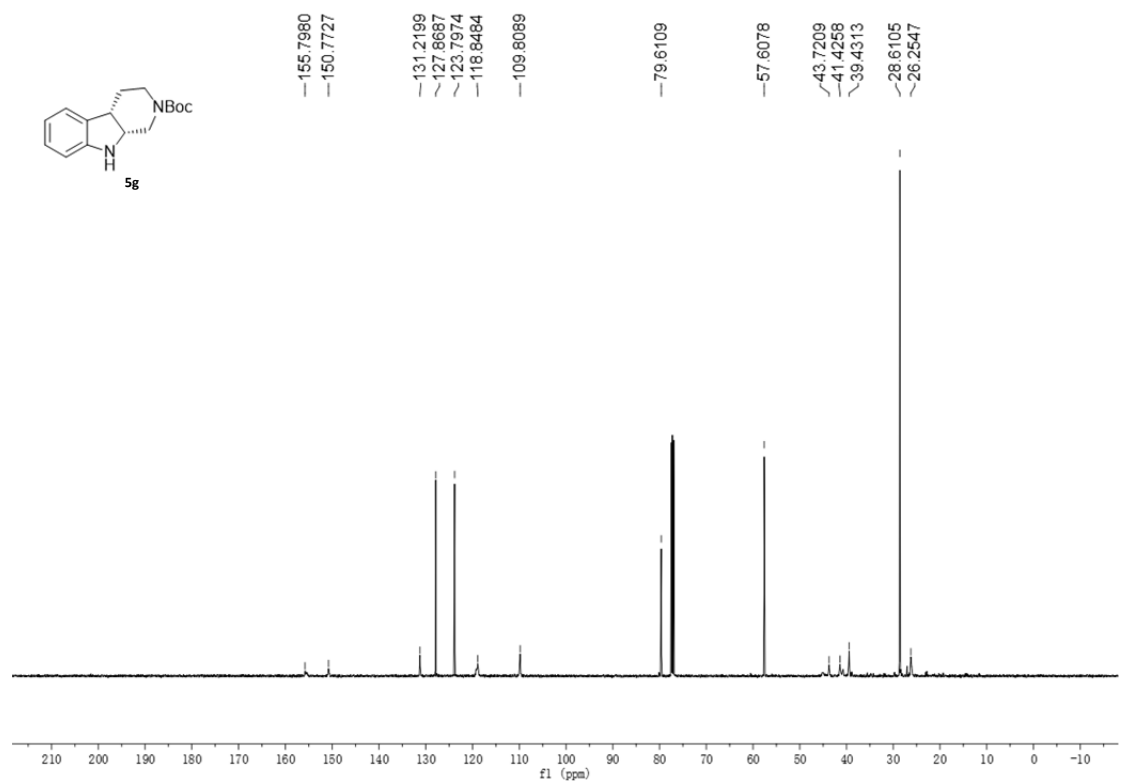

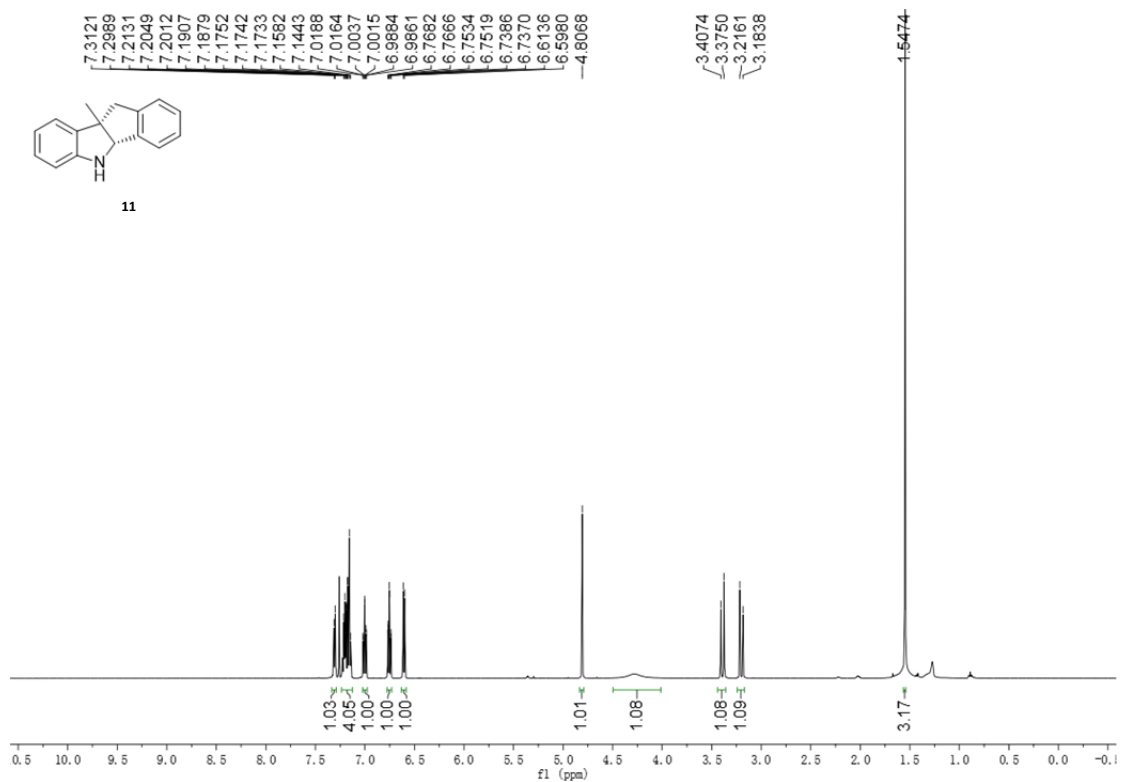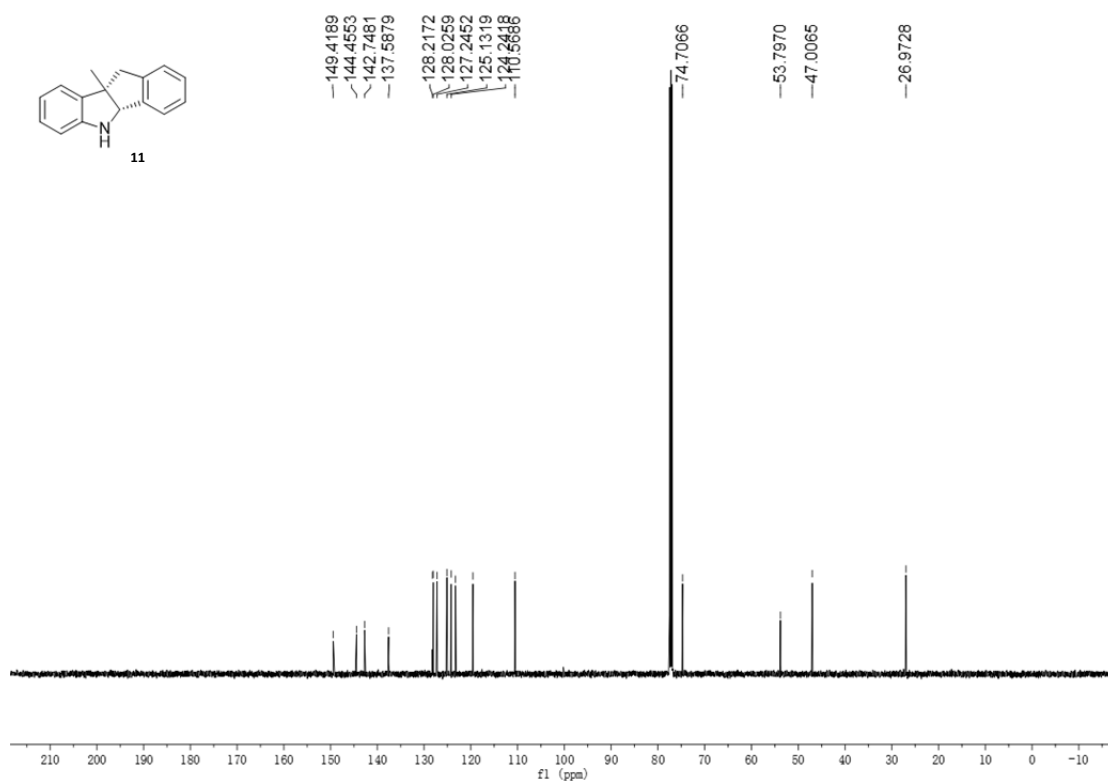

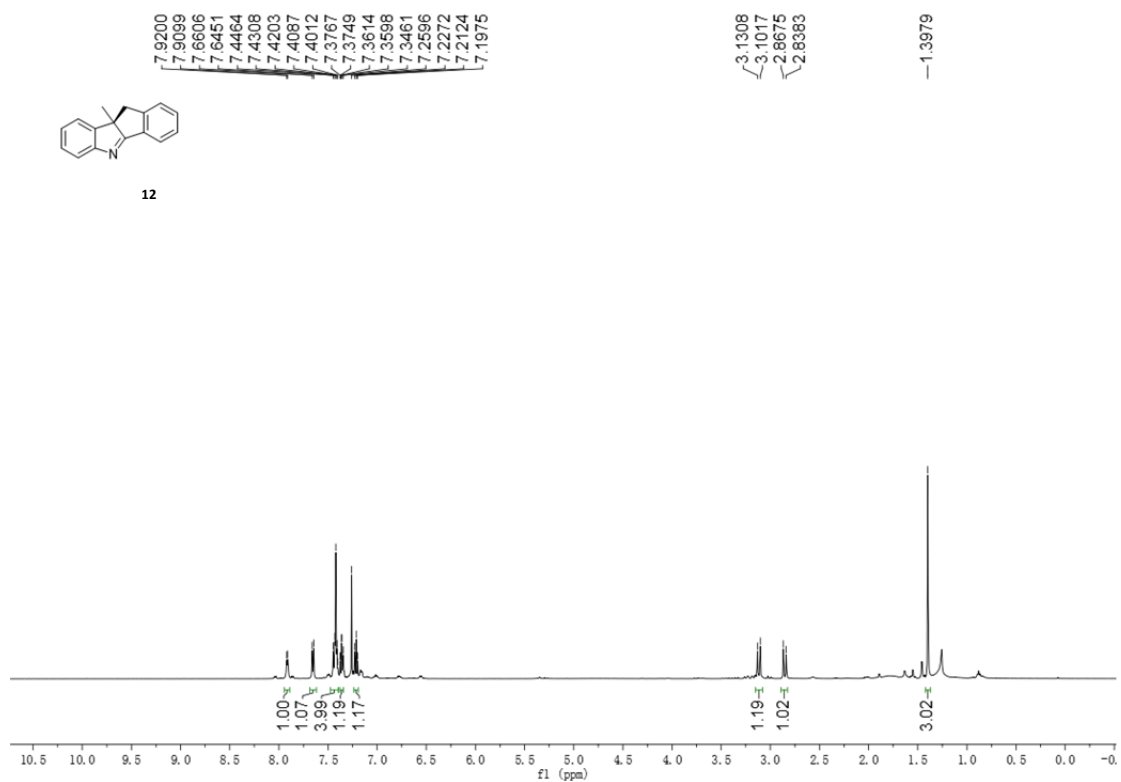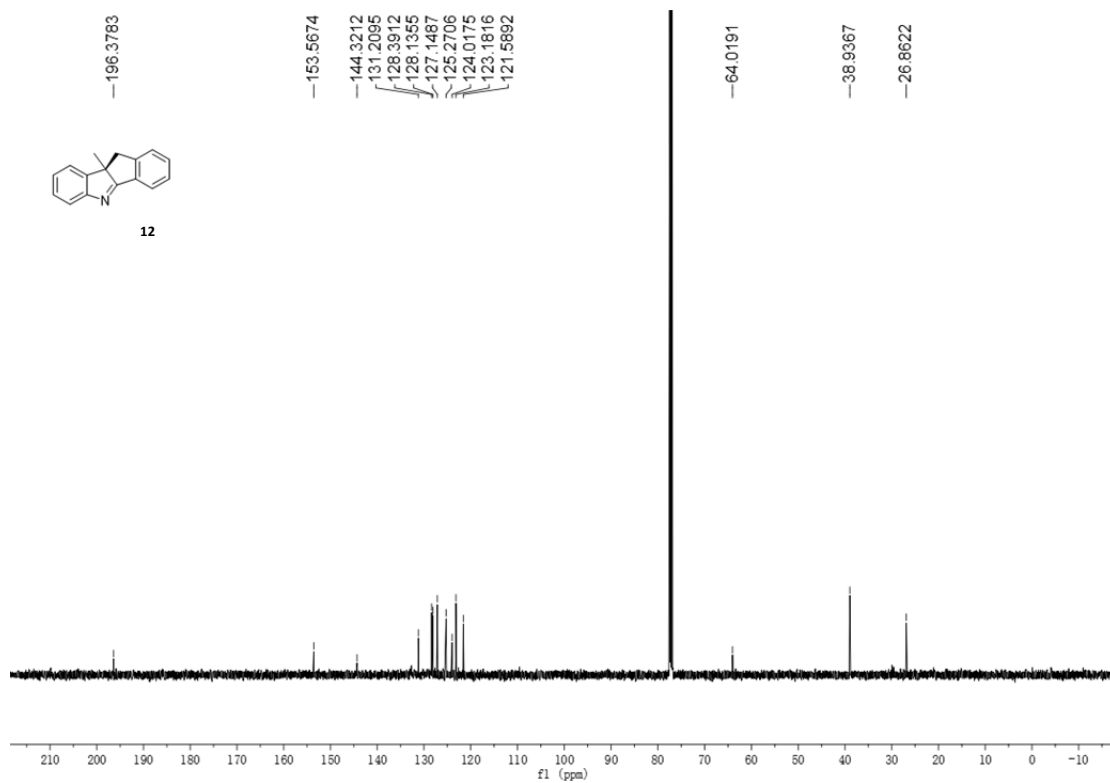

# HPLC

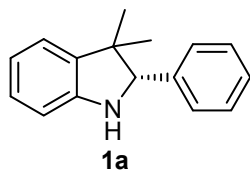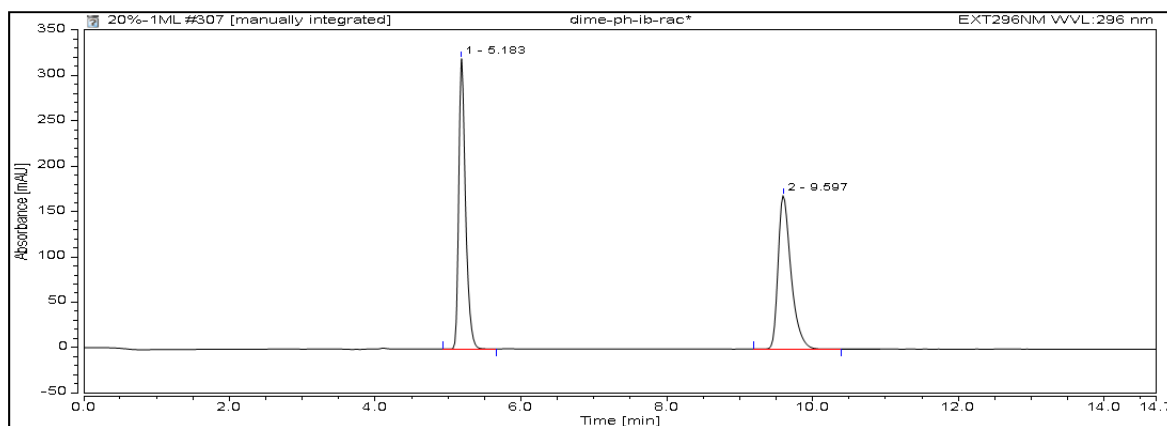

## Integration Results

| No.           | Peak Name | Retention Time<br>min | Area<br>mAU*min | Relative Area<br>% | Amount<br>n.a. |
|---------------|-----------|-----------------------|-----------------|--------------------|----------------|
| 1             |           | 5.183                 | 34.677          | 49.92              | n.a.           |
| 2             |           | 9.597                 | 34.794          | 50.08              | n.a.           |
| <b>Total:</b> |           |                       | <b>69.471</b>   | <b>100.00</b>      |                |

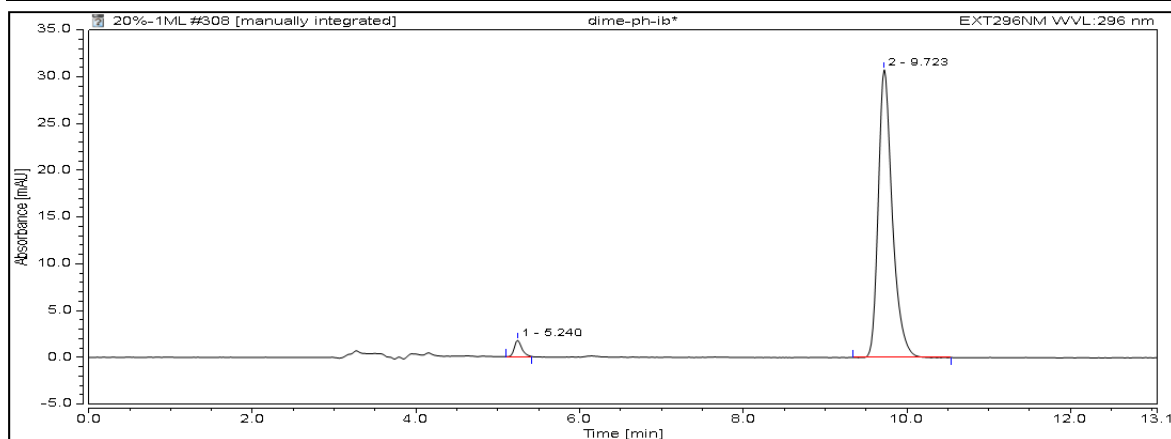

## Integration Results

| No.           | Peak Name | Retention Time<br>min | Area<br>mAU*min | Relative Area<br>% | Amount<br>n.a. |
|---------------|-----------|-----------------------|-----------------|--------------------|----------------|
| 1             |           | 5.240                 | 0.186           | 2.95               | n.a.           |
| 2             |           | 9.723                 | 6.117           | 97.05              | n.a.           |
| <b>Total:</b> |           |                       | <b>6.303</b>    | <b>100.00</b>      |                |

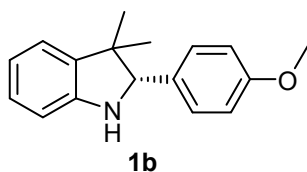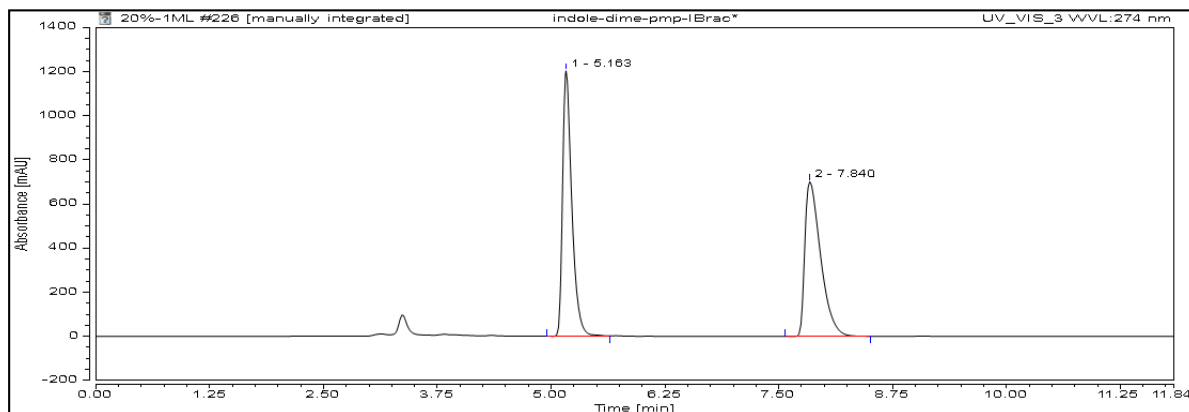

#### Integration Results

| No.           | Peak Name | Retention Time<br>min | Area<br>mAU*min | Relative Area<br>% | Amount<br>n.a. |
|---------------|-----------|-----------------------|-----------------|--------------------|----------------|
| 1             |           | 5.163                 | 141.140         | 50.06              | n.a.           |
| 2             |           | 7.840                 | 140.817         | 49.94              | n.a.           |
| <b>Total:</b> |           |                       | <b>281.957</b>  | <b>100.00</b>      |                |

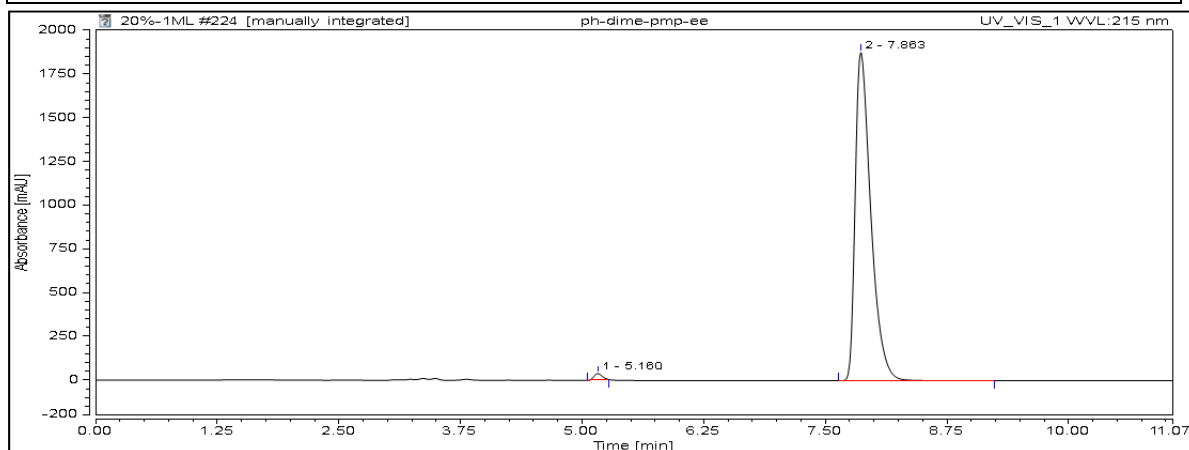

#### Integration Results

| No.           | Peak Name | Retention Time<br>min | Area<br>mAU*min | Relative Area<br>% | Amount<br>n.a. |
|---------------|-----------|-----------------------|-----------------|--------------------|----------------|
| 1             |           | 5.160                 | 3.587           | 1.02               | n.a.           |
| 2             |           | 7.863                 | 349.349         | 98.98              | n.a.           |
| <b>Total:</b> |           |                       | <b>352.936</b>  | <b>100.00</b>      |                |

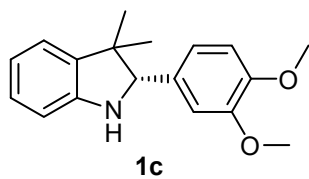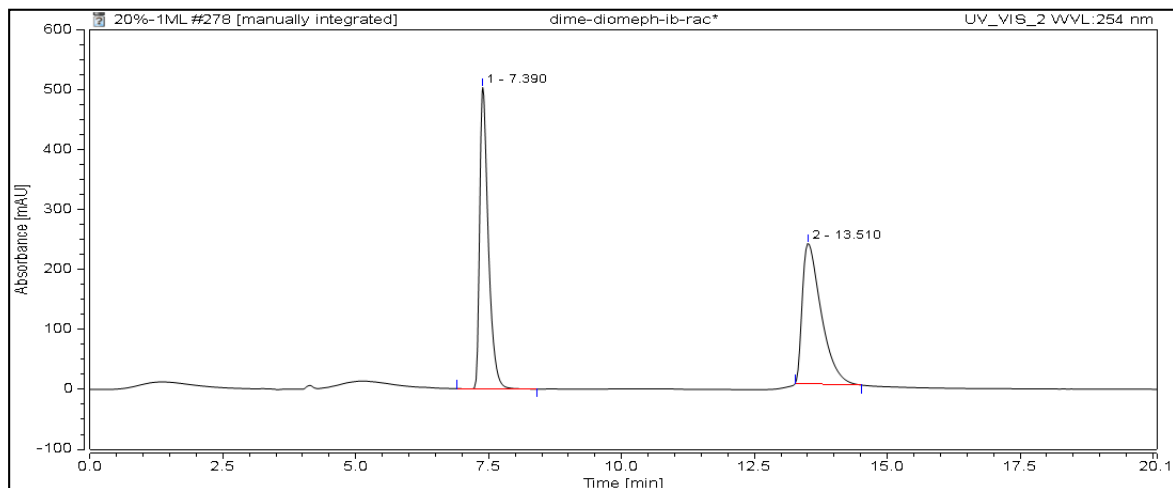

#### Integration Results

| No.           | Peak Name | Retention Time<br>min | Area<br>mAU*min | Relative Area<br>% | Amount<br>n.a. |
|---------------|-----------|-----------------------|-----------------|--------------------|----------------|
| 1             |           | 7.390                 | 94.399          | 49.42              | n.a.           |
| 2             |           | 13.510                | 96.622          | 50.58              | n.a.           |
| <b>Total:</b> |           |                       | <b>191.021</b>  | <b>100.00</b>      |                |

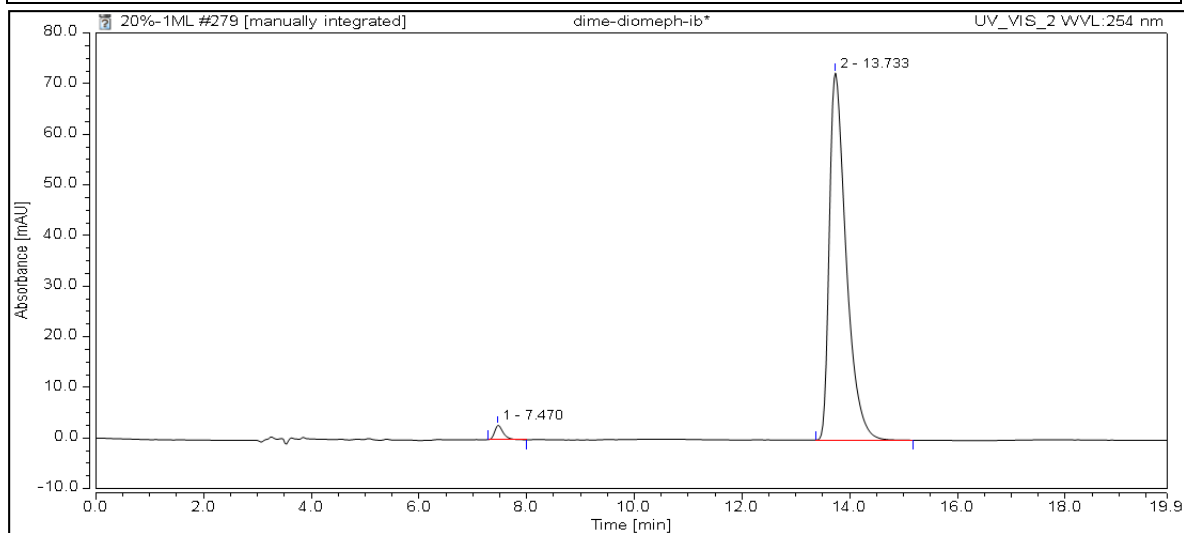

#### Integration Results

| No.           | Peak Name | Retention Time<br>min | Area<br>mAU*min | Relative Area<br>% | Amount<br>n.a. |
|---------------|-----------|-----------------------|-----------------|--------------------|----------------|
| 1             |           | 7.470                 | 0.530           | 1.98               | n.a.           |
| 2             |           | 13.733                | 26.216          | 98.02              | n.a.           |
| <b>Total:</b> |           |                       | <b>26.746</b>   | <b>100.00</b>      |                |

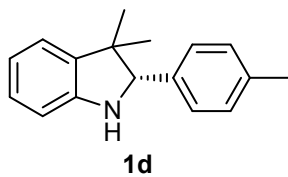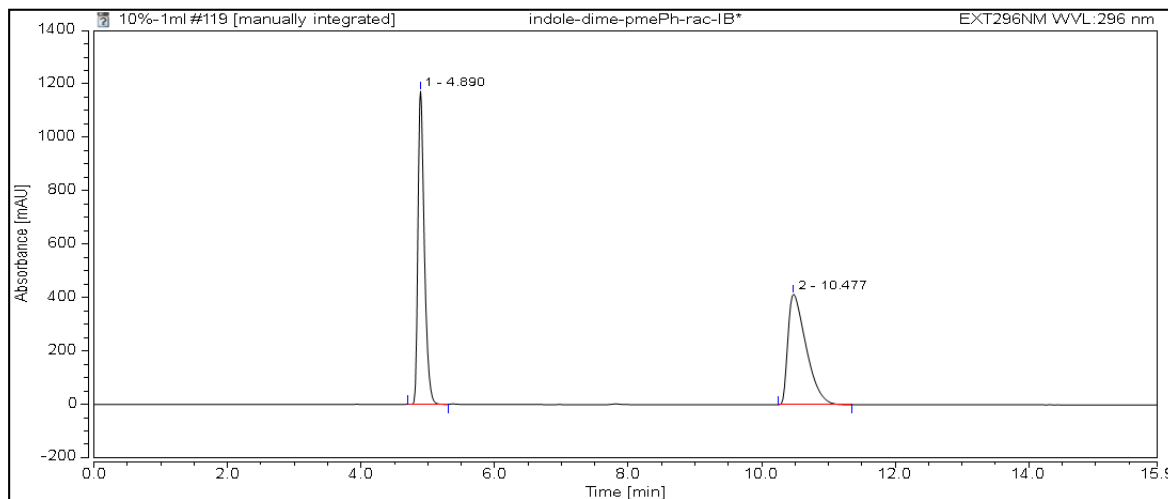

### Integration Results

| No.           | Peak Name | Retention Time<br>min | Area<br>mAU*min | Relative Area<br>% | Amount<br>n.a. |
|---------------|-----------|-----------------------|-----------------|--------------------|----------------|
| 1             |           | 4.890                 | 129.476         | 49.82              | n.a.           |
| 2             |           | 10.477                | 130.438         | 50.18              | n.a.           |
| <b>Total:</b> |           |                       | <b>259.914</b>  | <b>100.00</b>      |                |

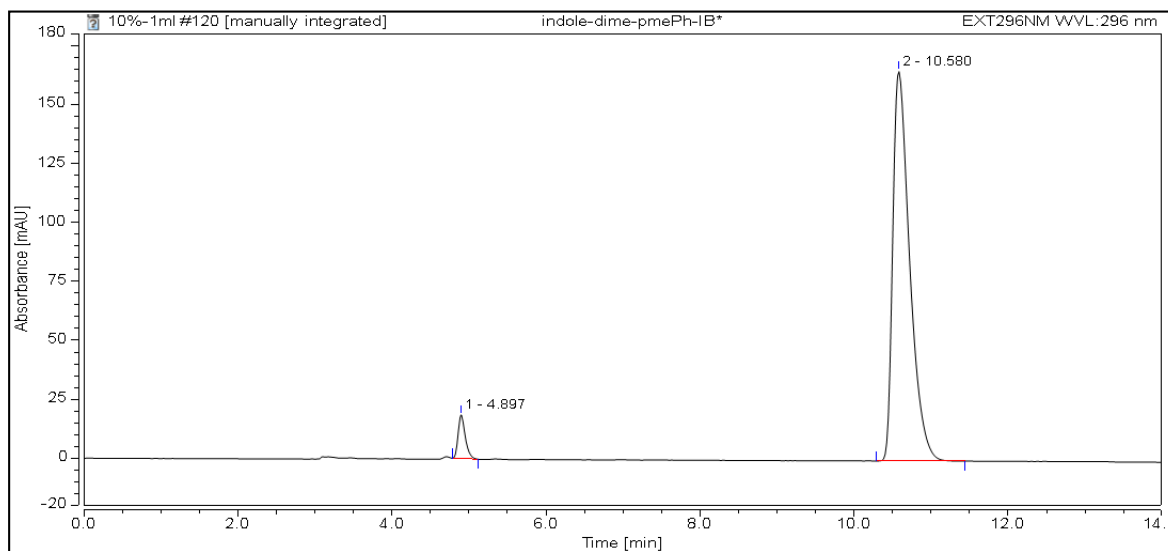

### Integration Results

| No.           | Peak Name | Retention Time<br>min | Area<br>mAU*min | Relative Area<br>% | Amount<br>n.a. |
|---------------|-----------|-----------------------|-----------------|--------------------|----------------|
| 1             |           | 4.897                 | 1.989           | 4.52               | n.a.           |
| 2             |           | 10.580                | 41.975          | 95.48              | n.a.           |
| <b>Total:</b> |           |                       | <b>43.964</b>   | <b>100.00</b>      |                |

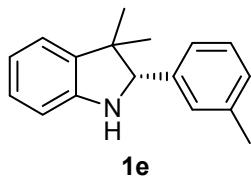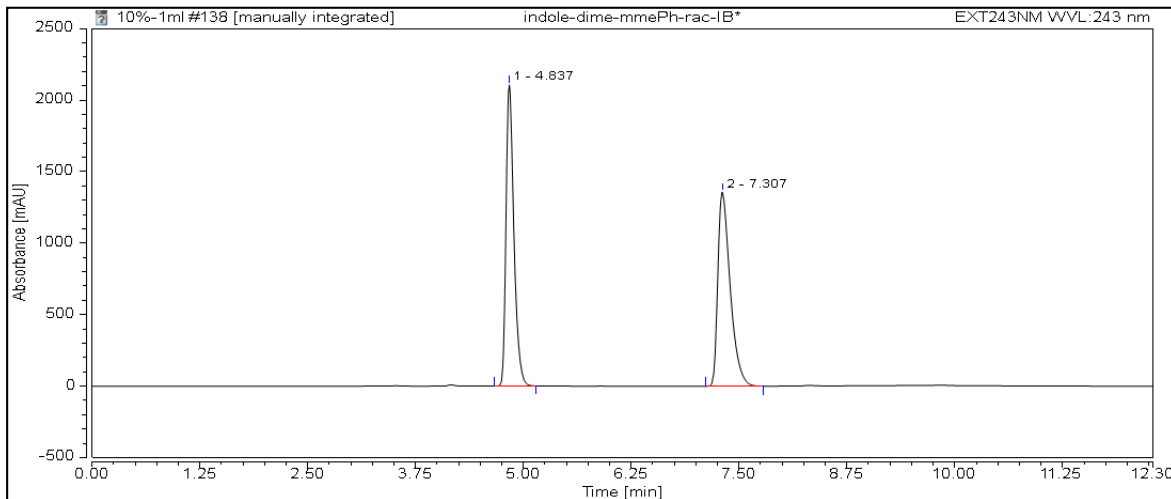

### Integration Results

| No.           | Peak Name | Retention Time<br>min | Area<br>mAU*min | Relative Area<br>% | Amount<br>n.a. |
|---------------|-----------|-----------------------|-----------------|--------------------|----------------|
| 1             |           | 4.837                 | 222.599         | 49.76              | n.a.           |
| 2             |           | 7.307                 | 224.783         | 50.24              | n.a.           |
| <b>Total:</b> |           |                       | <b>447.382</b>  | <b>100.00</b>      |                |

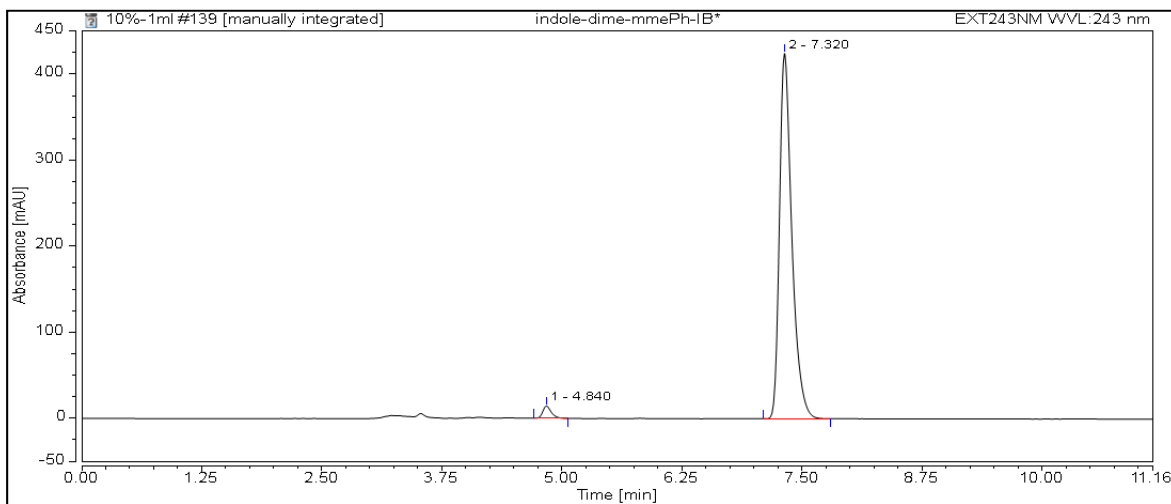

### Integration Results

| No.           | Peak Name | Retention Time<br>min | Area<br>mAU*min | Relative Area<br>% | Amount<br>n.a. |
|---------------|-----------|-----------------------|-----------------|--------------------|----------------|
| 1             |           | 4.840                 | 1.455           | 2.24               | n.a.           |
| 2             |           | 7.320                 | 63.639          | 97.76              | n.a.           |
| <b>Total:</b> |           |                       | <b>65.095</b>   | <b>100.00</b>      |                |



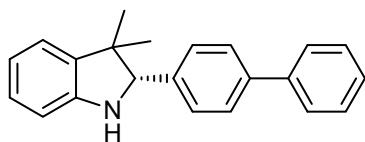

**1f**

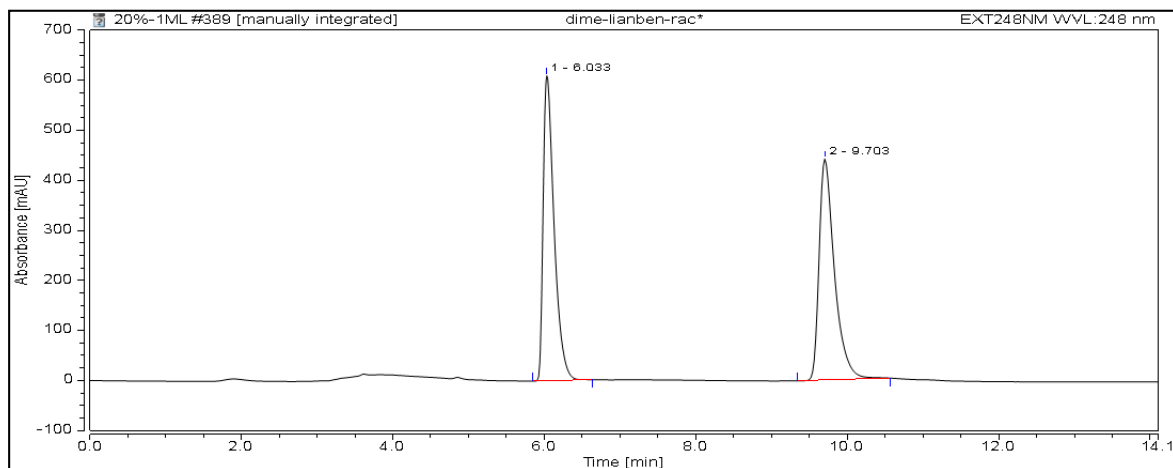

### Integration Results

| No.           | Peak Name | Retention Time<br>min | Area<br>mAU*min | Relative Area<br>% | Amount<br>n.a. |
|---------------|-----------|-----------------------|-----------------|--------------------|----------------|
| 1             |           | 6.033                 | 101.840         | 49.53              | n.a.           |
| 2             |           | 9.703                 | 103.791         | 50.47              | n.a.           |
| <b>Total:</b> |           |                       | <b>205.631</b>  | <b>100.00</b>      |                |

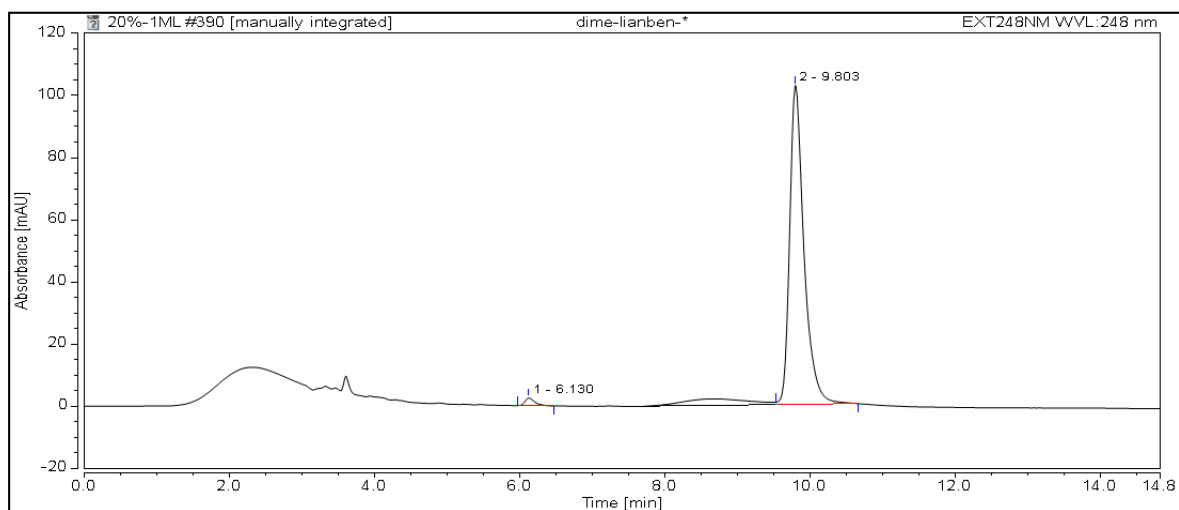

### Integration Results

| No.           | Peak Name | Retention Time<br>min | Area<br>mAU*min | Relative Area<br>% | Amount<br>n.a. |
|---------------|-----------|-----------------------|-----------------|--------------------|----------------|
| 1             |           | 6.130                 | 0.386           | 1.62               | n.a.           |
| 2             |           | 9.803                 | 23.483          | 98.38              | n.a.           |
| <b>Total:</b> |           |                       | <b>23.869</b>   | <b>100.00</b>      |                |

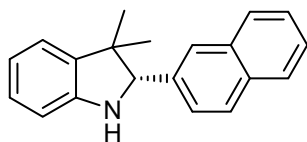

**1g**

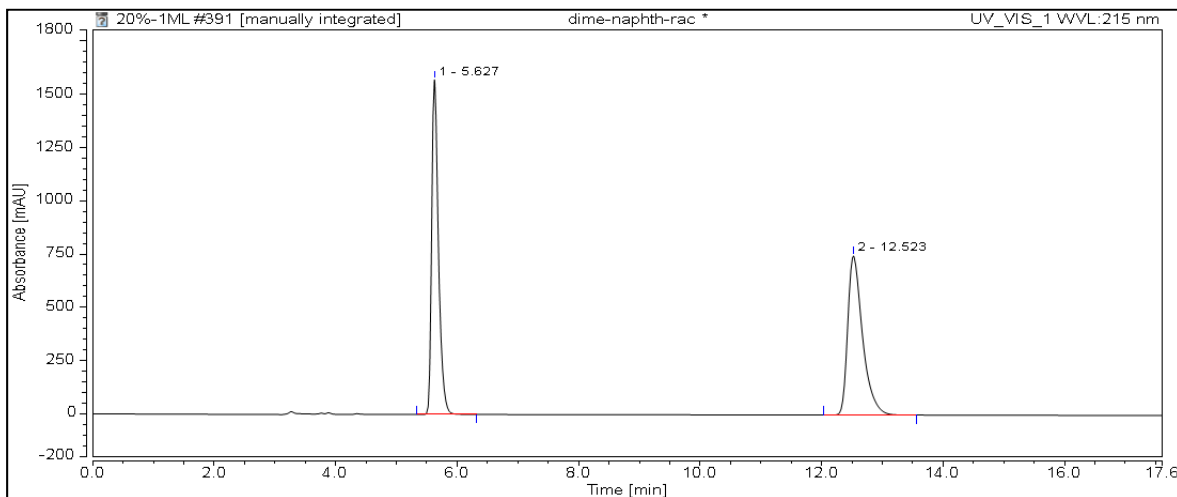

### Integration Results

| No.           | Peak Name | Retention Time<br>min | Area<br>mAU*min | Relative Area<br>% | Amount<br>n.a. |
|---------------|-----------|-----------------------|-----------------|--------------------|----------------|
| 1             |           | 5.627                 | 202.858         | 49.03              | n.a.           |
| 2             |           | 12.523                | 210.875         | 50.97              | n.a.           |
| <b>Total:</b> |           |                       | <b>413.732</b>  | <b>100.00</b>      |                |

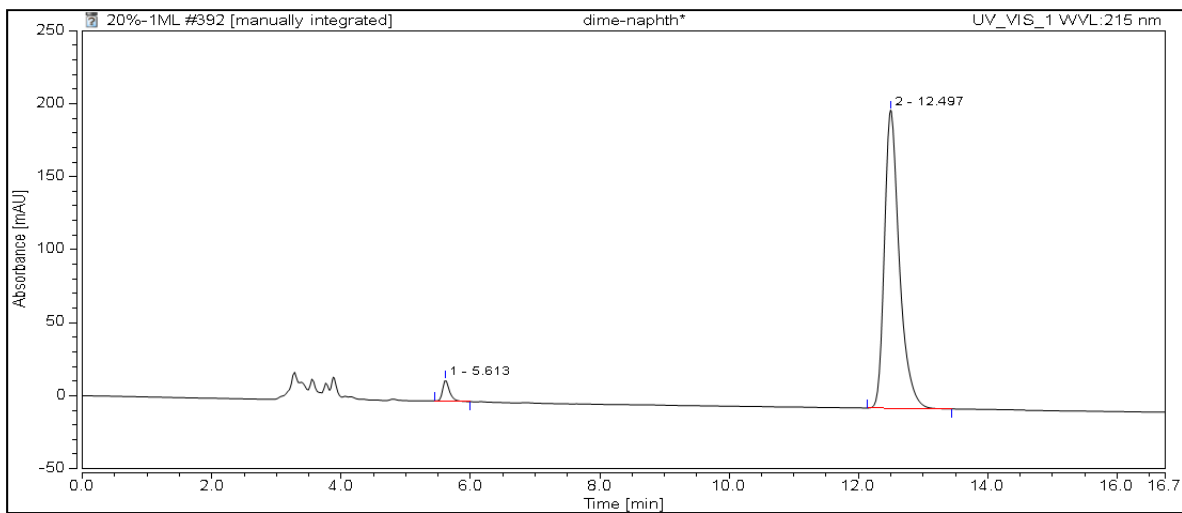

### Integration Results

| No.           | Peak Name | Retention Time<br>min | Area<br>mAU*min | Relative Area<br>% | Amount<br>n.a. |
|---------------|-----------|-----------------------|-----------------|--------------------|----------------|
| 1             |           | 5.613                 | 1.756           | 3.11               | n.a.           |
| 2             |           | 12.497                | 54.637          | 96.89              | n.a.           |
| <b>Total:</b> |           |                       | <b>56.393</b>   | <b>100.00</b>      |                |

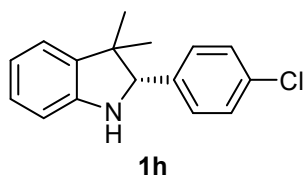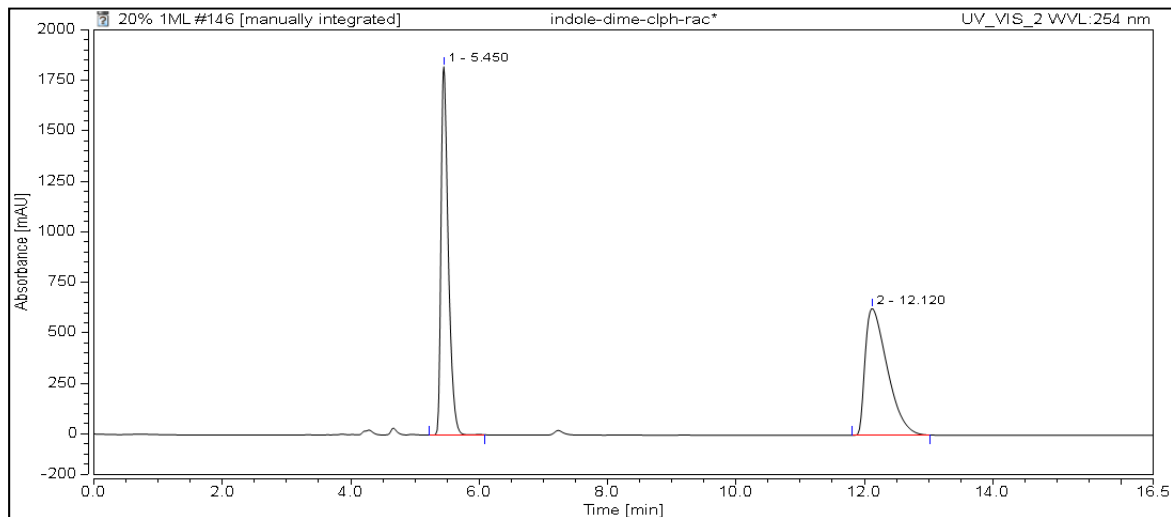

#### Integration Results

| No.           | Peak Name | Retention Time<br>min | Area<br>mAU*min | Relative Area<br>% | Amount<br>n.a. |
|---------------|-----------|-----------------------|-----------------|--------------------|----------------|
| 1             |           | 5.450                 | 238.753         | 48.89              | n.a.           |
| 2             |           | 12.120                | 249.638         | 51.11              | n.a.           |
| <b>Total:</b> |           |                       | <b>488.391</b>  | <b>100.00</b>      |                |

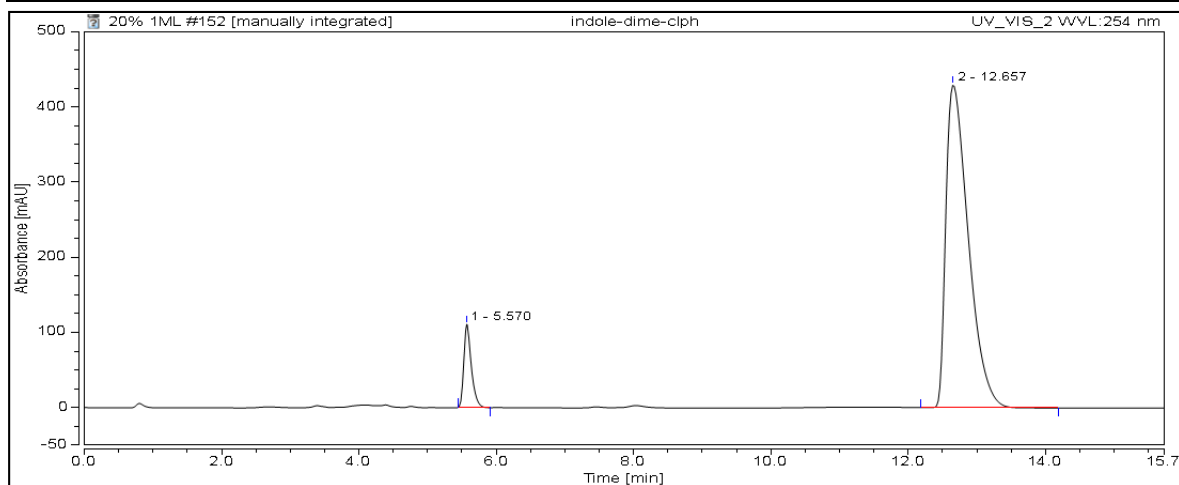

#### Integration Results

| No.           | Peak Name | Retention Time<br>min | Area<br>mAU*min | Relative Area<br>% | Amount<br>n.a. |
|---------------|-----------|-----------------------|-----------------|--------------------|----------------|
| 1             |           | 5.570                 | 13.925          | 7.89               | n.a.           |
| 2             |           | 12.657                | 162.511         | 92.11              | n.a.           |
| <b>Total:</b> |           |                       | <b>176.436</b>  | <b>100.00</b>      |                |

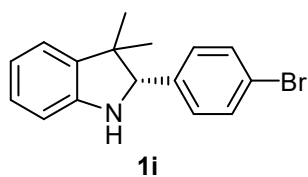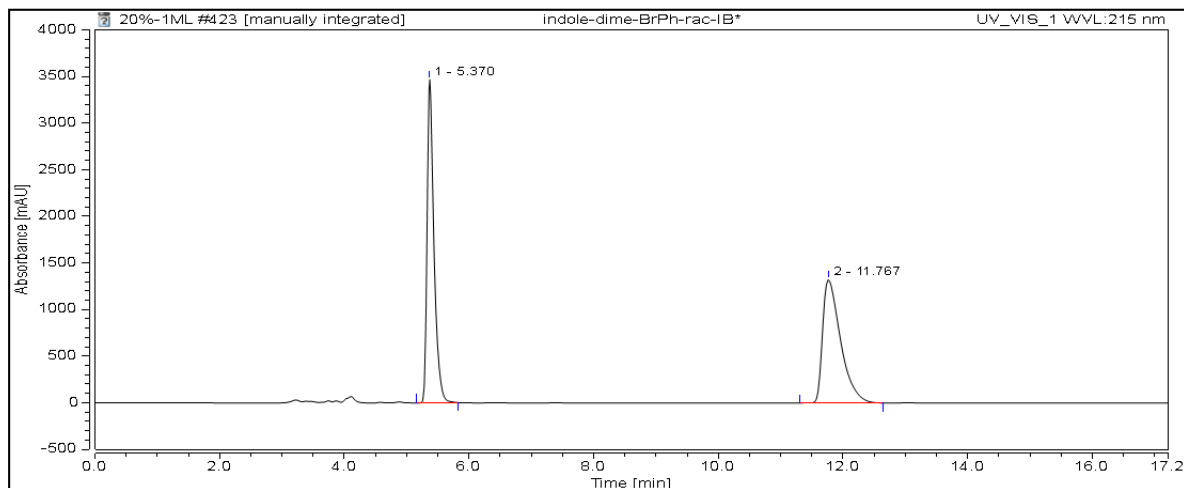

#### Integration Results

| No.           | Peak Name | Retention Time<br>min | Area<br>mAU*min | Relative Area<br>% | Amount<br>n.a. |
|---------------|-----------|-----------------------|-----------------|--------------------|----------------|
| 1             |           | 5.370                 | 438.707         | 49.86              | n.a.           |
| 2             |           | 11.767                | 441.161         | 50.14              | n.a.           |
| <b>Total:</b> |           |                       | <b>879.868</b>  | <b>100.00</b>      |                |

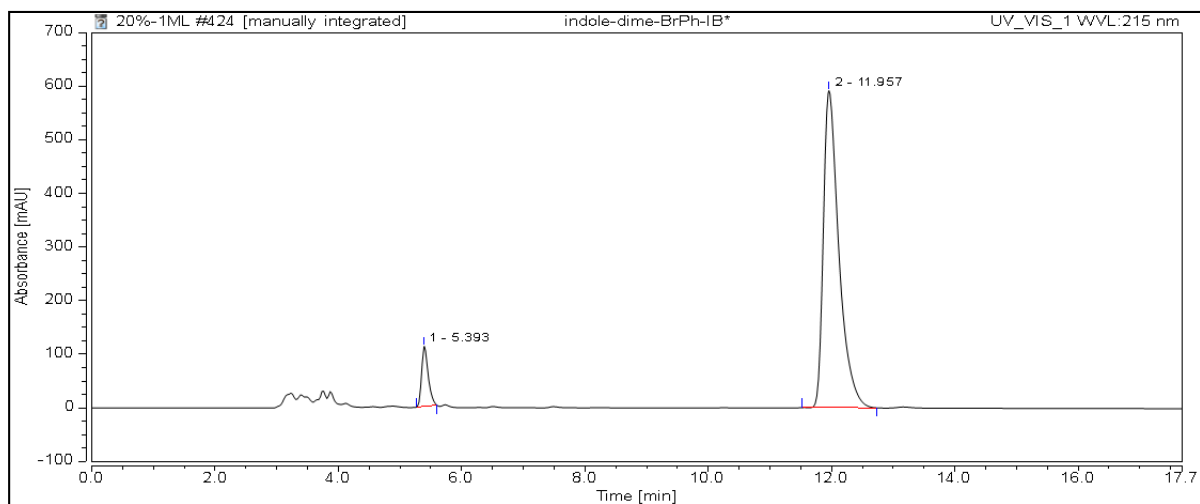

#### Integration Results

| No.           | Peak Name | Retention Time<br>min | Area<br>mAU*min | Relative Area<br>% | Amount<br>n.a. |
|---------------|-----------|-----------------------|-----------------|--------------------|----------------|
| 1             |           | 5.393                 | 13.856          | 7.45               | n.a.           |
| 2             |           | 11.957                | 172.233         | 92.55              | n.a.           |
| <b>Total:</b> |           |                       | <b>186.089</b>  | <b>100.00</b>      |                |

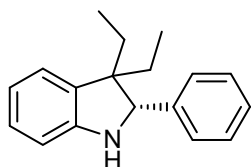

1j

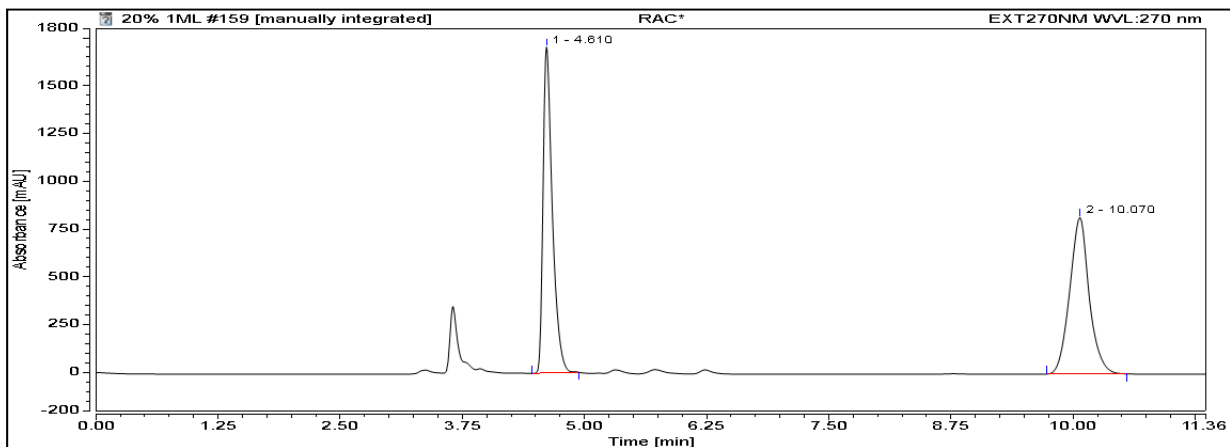

### Integration Results

| No.           | Peak Name | Retention Time<br>min | Area<br>mAU*min | Relative Area<br>% | Amount<br>n.a. |
|---------------|-----------|-----------------------|-----------------|--------------------|----------------|
| 1             |           | 4.610                 | 187.923         | 49.80              | n.a.           |
| 2             |           | 10.070                | 189.424         | 50.20              | n.a.           |
| <b>Total:</b> |           |                       | <b>377.347</b>  | <b>100.00</b>      |                |

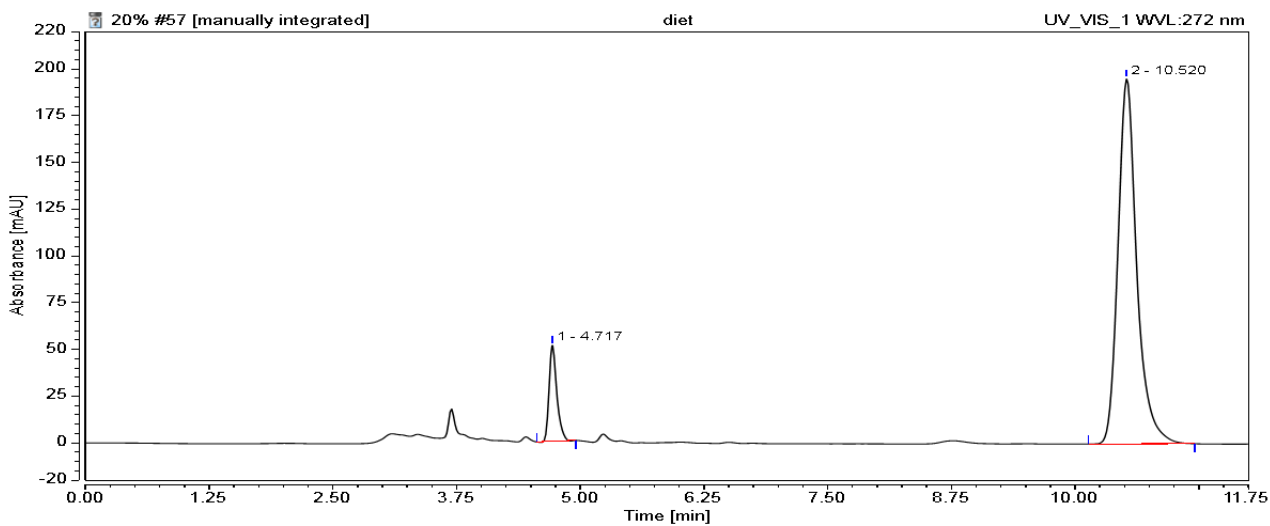

### Integration Results

| No.           | Peak Name | Retention Time<br>min | Area<br>mAU*min | Relative Area<br>% | Amount<br>n.a. |
|---------------|-----------|-----------------------|-----------------|--------------------|----------------|
| 1             |           | 4.717                 | 4.620           | 9.69               | n.a.           |
| 2             |           | 10.520                | 43.077          | 90.31              | n.a.           |
| <b>Total:</b> |           |                       | <b>47.698</b>   | <b>100.00</b>      |                |

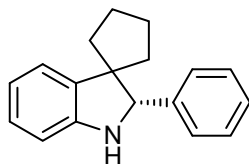

**1k**

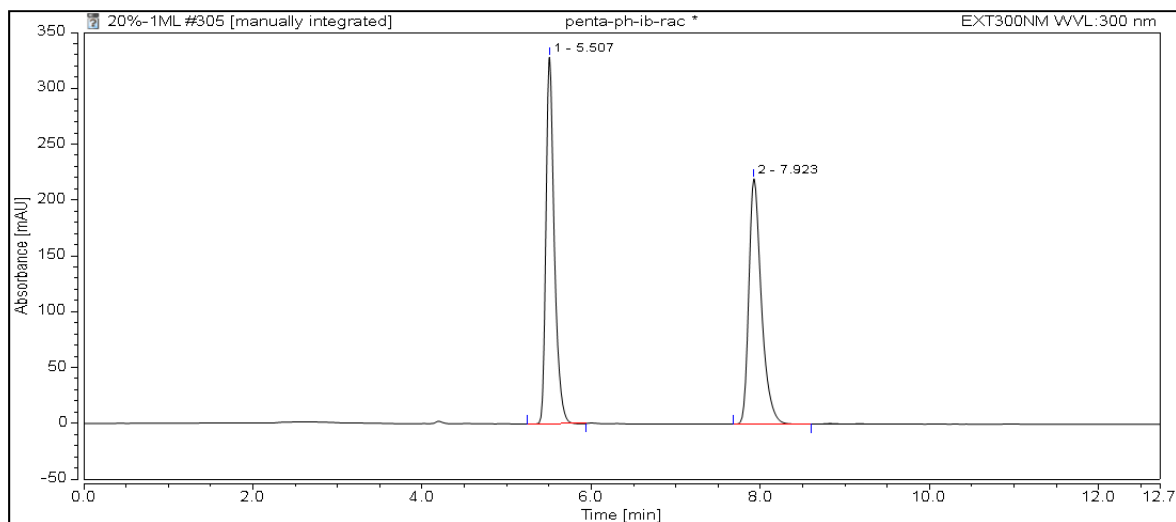

### Integration Results

| No.           | Peak Name | Retention Time<br>min | Area<br>mAU*min | Relative Area<br>% | Amount<br>n.a. |
|---------------|-----------|-----------------------|-----------------|--------------------|----------------|
| 1             |           | 5.507                 | 37.474          | 49.87              | n.a.           |
| 2             |           | 7.923                 | 37.673          | 50.13              | n.a.           |
| <b>Total:</b> |           |                       | <b>75.147</b>   | <b>100.00</b>      |                |

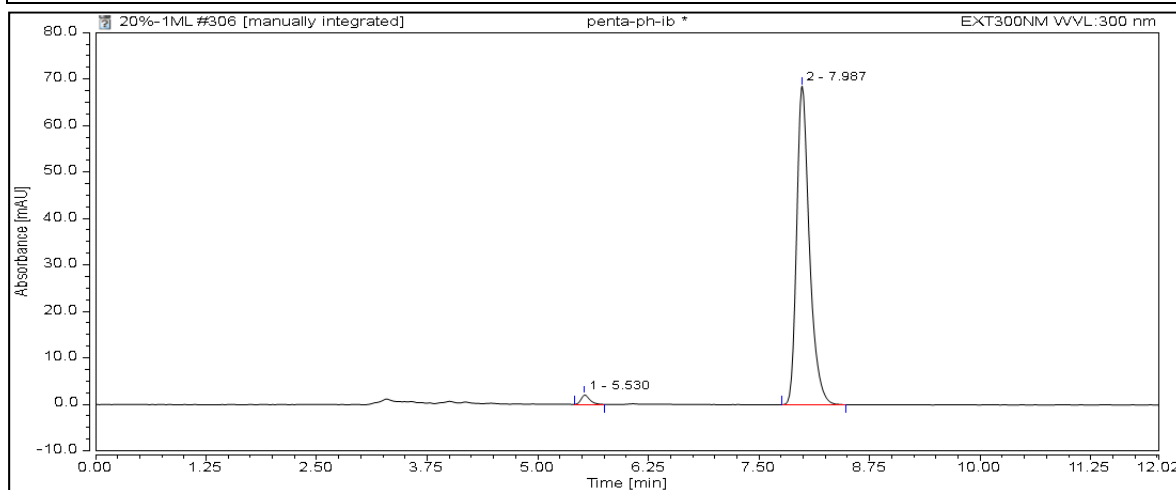

### Integration Results

| No.           | Peak Name | Retention Time<br>min | Area<br>mAU*min | Relative Area<br>% | Amount<br>n.a. |
|---------------|-----------|-----------------------|-----------------|--------------------|----------------|
| 1             |           | 5.530                 | 0.232           | 1.98               | n.a.           |
| 2             |           | 7.987                 | 11.482          | 98.02              | n.a.           |
| <b>Total:</b> |           |                       | <b>11.714</b>   | <b>100.00</b>      |                |

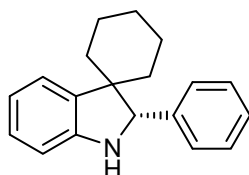

11

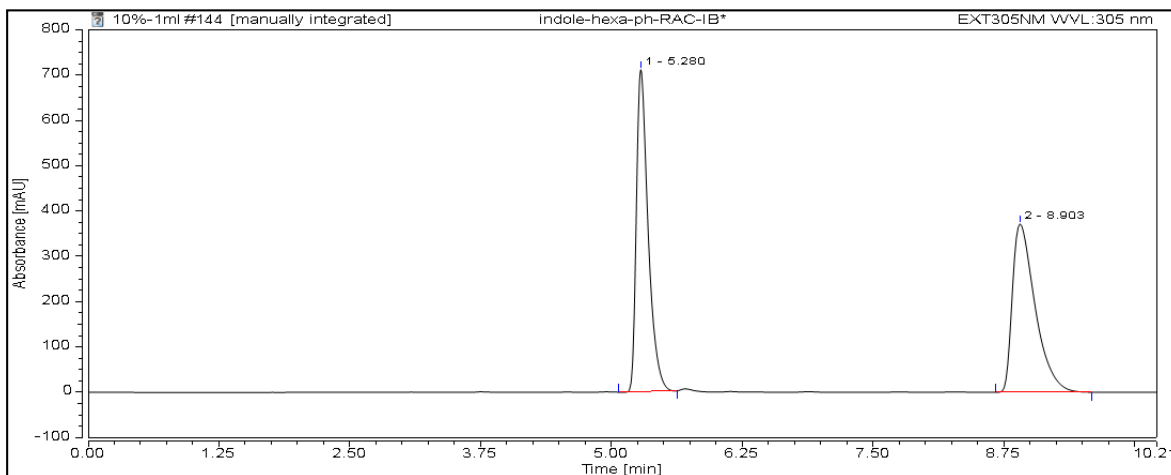

#### Integration Results

| No.           | Peak Name | Retention Time<br>min | Area<br>mAU*min | Relative Area<br>% | Amount<br>n.a. |
|---------------|-----------|-----------------------|-----------------|--------------------|----------------|
| 1             |           | 5.280                 | 92.296          | 49.66              | n.a.           |
| 2             |           | 8.903                 | 93.543          | 50.34              | n.a.           |
| <b>Total:</b> |           |                       | <b>185.839</b>  | <b>100.00</b>      |                |

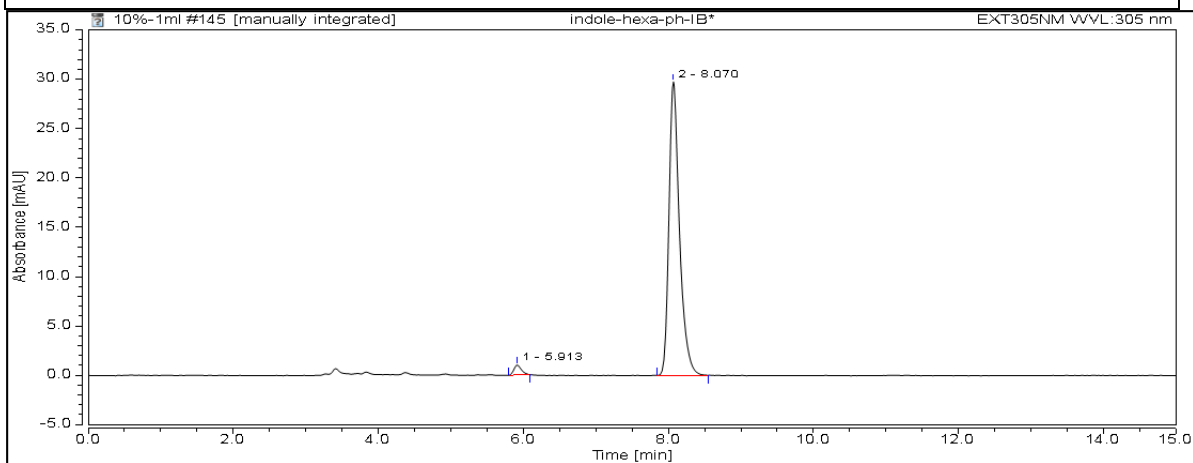

#### Integration Results

| No.           | Peak Name | Retention Time<br>min | Area<br>mAU*min | Relative Area<br>% | Amount<br>n.a. |
|---------------|-----------|-----------------------|-----------------|--------------------|----------------|
| 1             |           | 5.913                 | 0.122           | 2.37               | n.a.           |
| 2             |           | 8.070                 | 5.018           | 97.63              | n.a.           |
| <b>Total:</b> |           |                       | <b>5.140</b>    | <b>100.00</b>      |                |

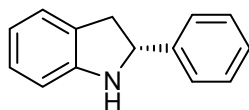

**1m**

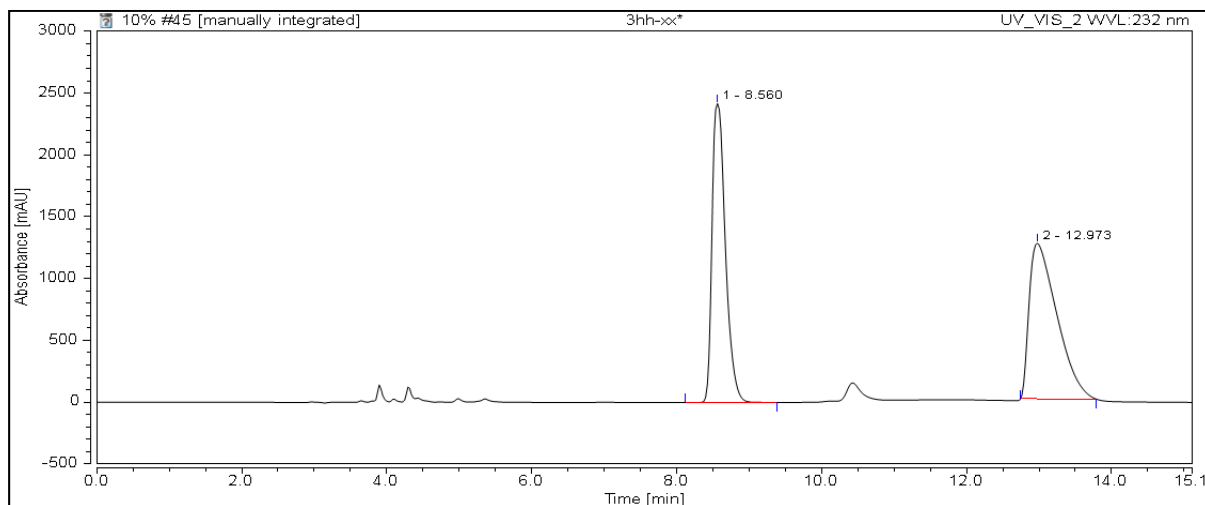

### Integration Results

| No.           | Peak Name | Retention Time<br>min | Area<br>mAU*min | Relative Area<br>% | Amount<br>n.a. |
|---------------|-----------|-----------------------|-----------------|--------------------|----------------|
| 1             |           | 8.560                 | 515.362         | 48.08              | n.a.           |
| 2             |           | 12.973                | 556.413         | 51.92              | n.a.           |
| <b>Total:</b> |           |                       | <b>1071.774</b> | <b>100.00</b>      |                |

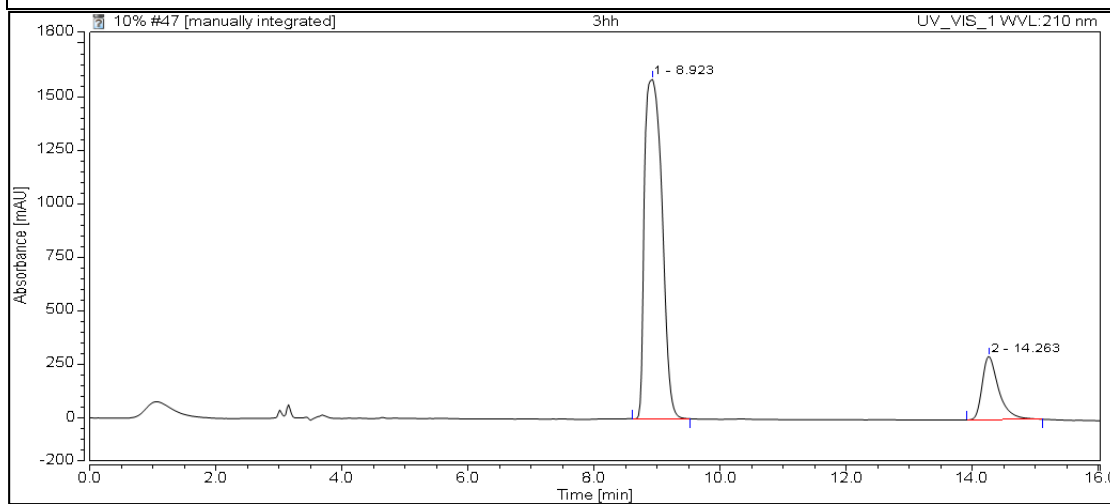

### Integration Results

| No.           | Peak Name | Retention Time<br>min | Area<br>mAU*min | Relative Area<br>% | Amount<br>n.a. |
|---------------|-----------|-----------------------|-----------------|--------------------|----------------|
| 1             |           | 8.923                 | 508.146         | 84.96              | n.a.           |
| 2             |           | 14.263                | 89.926          | 15.04              | n.a.           |
| <b>Total:</b> |           |                       | <b>598.071</b>  | <b>100.00</b>      |                |



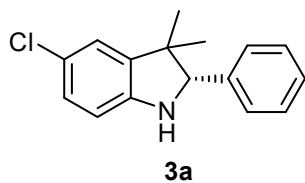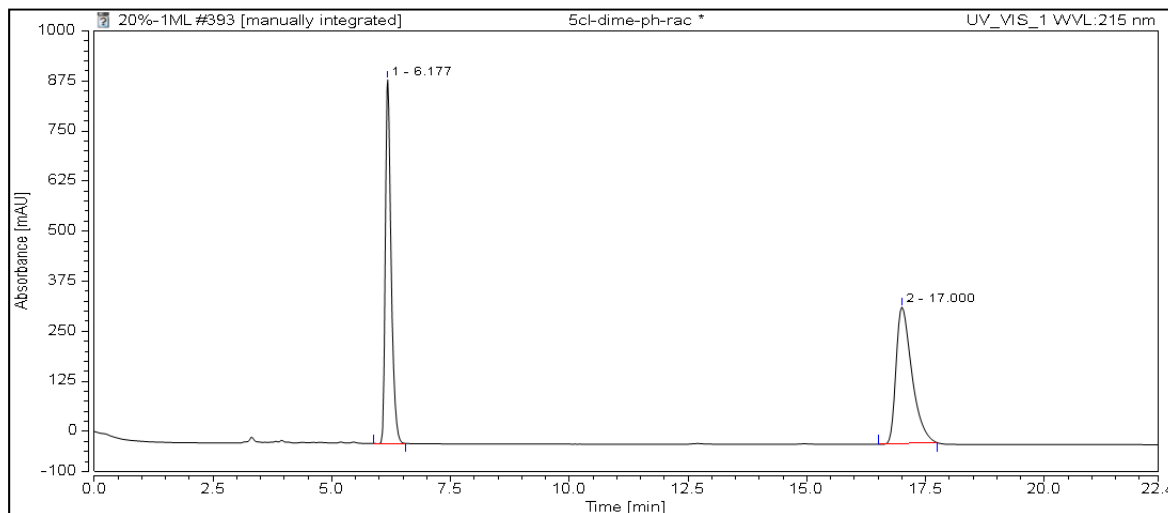

#### Integration Results

| No.           | Peak Name | Retention Time<br>min | Area<br>mAU*min | Relative Area<br>% | Amount<br>n.a. |
|---------------|-----------|-----------------------|-----------------|--------------------|----------------|
| 1             |           | 6.177                 | 127.293         | 49.15              | n.a.           |
| 2             |           | 17.000                | 131.679         | 50.85              | n.a.           |
| <b>Total:</b> |           |                       | <b>258.972</b>  | <b>100.00</b>      |                |

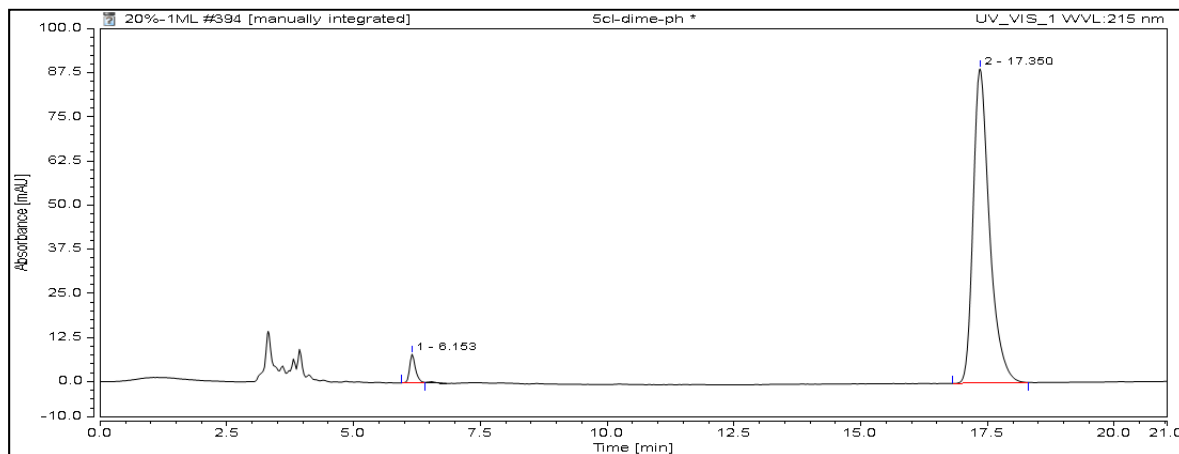

#### Integration Results

| No.           | Peak Name | Retention Time<br>min | Area<br>mAU*min | Relative Area<br>% | Amount<br>n.a. |
|---------------|-----------|-----------------------|-----------------|--------------------|----------------|
| 1             |           | 6.153                 | 1.117           | 3.24               | n.a.           |
| 2             |           | 17.350                | 33.379          | 96.76              | n.a.           |
| <b>Total:</b> |           |                       | <b>34.496</b>   | <b>100.00</b>      |                |

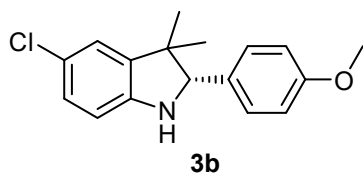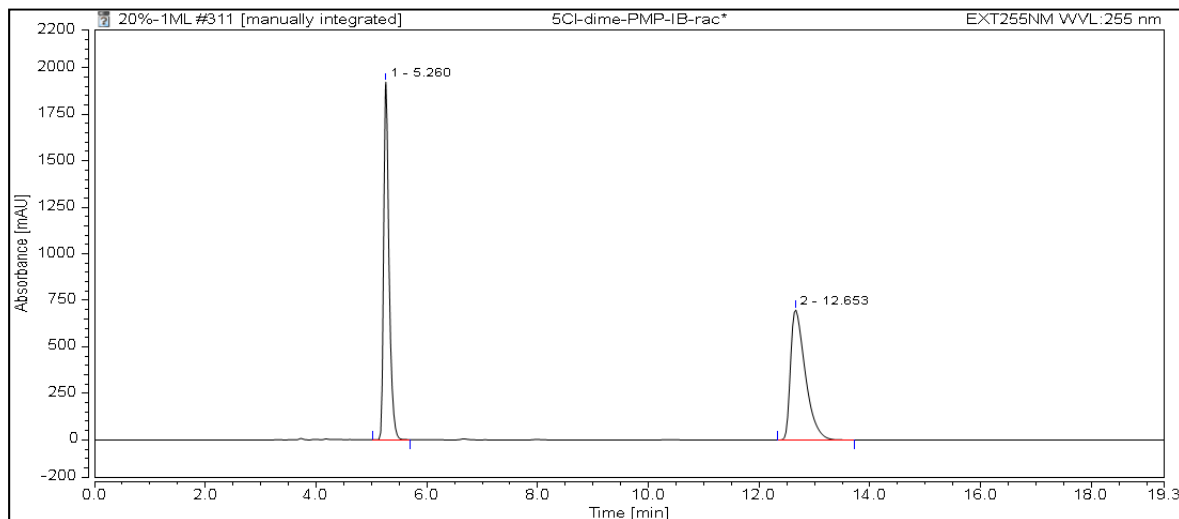

#### Integration Results

| No.           | Peak Name | Retention Time<br>min | Area<br>mAU*min | Relative Area<br>% | Amount<br>n.a. |
|---------------|-----------|-----------------------|-----------------|--------------------|----------------|
| 1             |           | 5.260                 | 215.373         | 49.97              | n.a.           |
| 2             |           | 12.653                | 215.625         | 50.03              | n.a.           |
| <b>Total:</b> |           |                       | <b>430.998</b>  | <b>100.00</b>      |                |

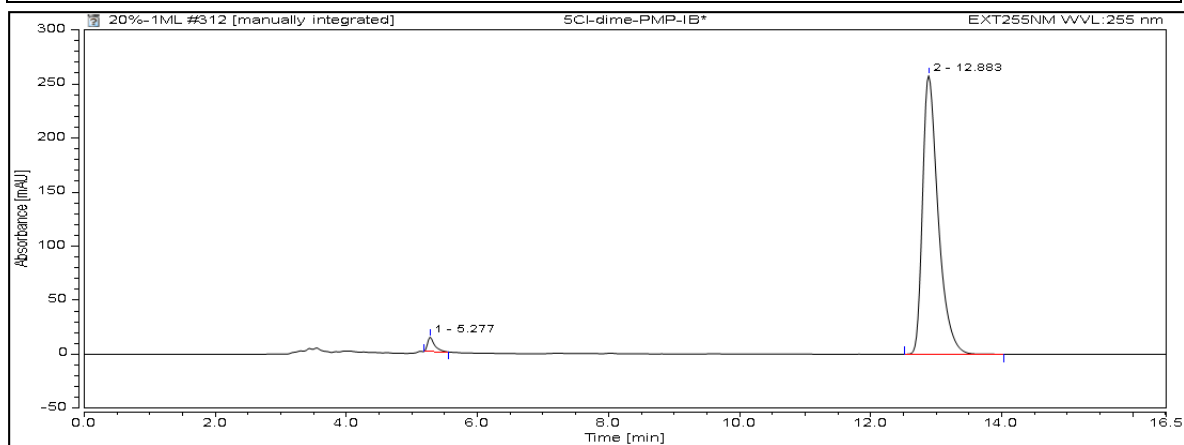

#### Integration Results

| No.           | Peak Name | Retention Time<br>min | Area<br>mAU*min | Relative Area<br>% | Amount<br>n.a. |
|---------------|-----------|-----------------------|-----------------|--------------------|----------------|
| 1             |           | 5.277                 | 1.687           | 2.32               | n.a.           |
| 2             |           | 12.883                | 71.146          | 97.68              | n.a.           |
| <b>Total:</b> |           |                       | <b>72.833</b>   | <b>100.00</b>      |                |

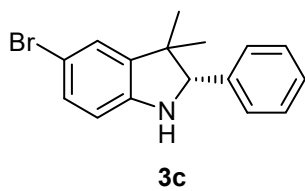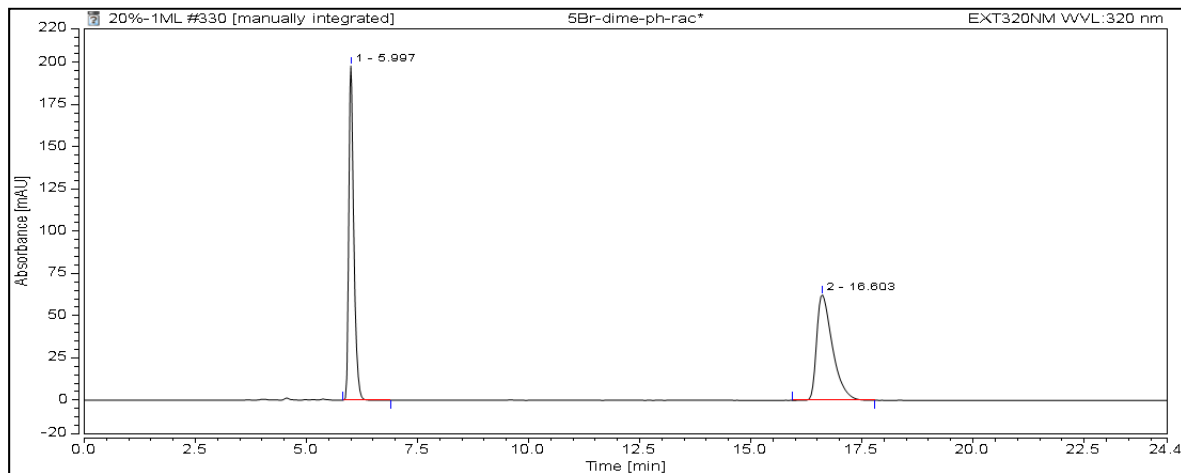

#### Integration Results

| No.           | Peak Name | Retention Time<br>min | Area<br>mAU*min | Relative Area<br>% | Amount<br>n.a. |
|---------------|-----------|-----------------------|-----------------|--------------------|----------------|
| 1             |           | 5.997                 | 25.644          | 49.91              | n.a.           |
| 2             |           | 16.603                | 25.734          | 50.09              | n.a.           |
| <b>Total:</b> |           |                       | <b>51.378</b>   | <b>100.00</b>      |                |

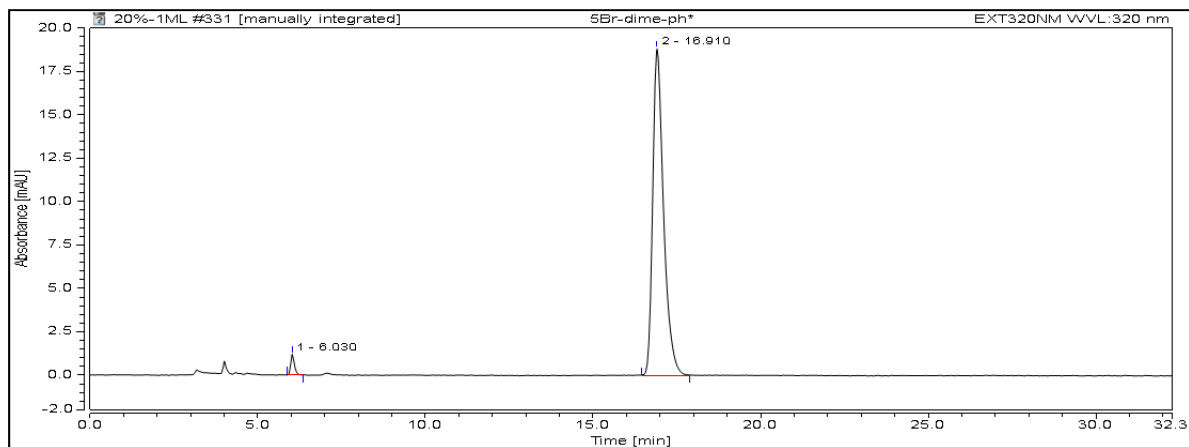

#### Integration Results

| No.           | Peak Name | Retention Time<br>min | Area<br>mAU*min | Relative Area<br>% | Amount<br>n.a. |
|---------------|-----------|-----------------------|-----------------|--------------------|----------------|
| 1             |           | 6.030                 | 0.155           | 2.14               | n.a.           |
| 2             |           | 16.910                | 7.072           | 97.86              | n.a.           |
| <b>Total:</b> |           |                       | <b>7.226</b>    | <b>100.00</b>      |                |

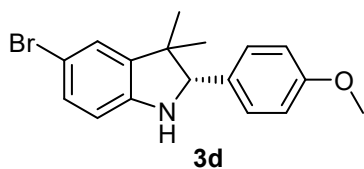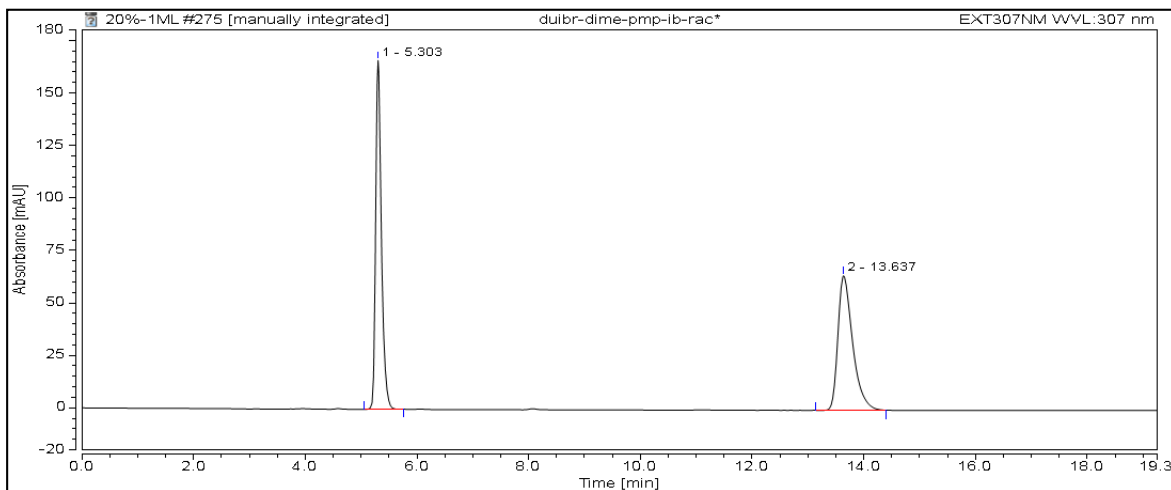

### Integration Results

| No.           | Peak Name | Retention Time<br>min | Area<br>mAU*min | Relative Area<br>% | Amount<br>n.a. |
|---------------|-----------|-----------------------|-----------------|--------------------|----------------|
| 1             |           | 5.303                 | 19.804          | 50.36              | n.a.           |
| 2             |           | 13.637                | 19.522          | 49.64              | n.a.           |
| <b>Total:</b> |           |                       | <b>39.326</b>   | <b>100.00</b>      |                |

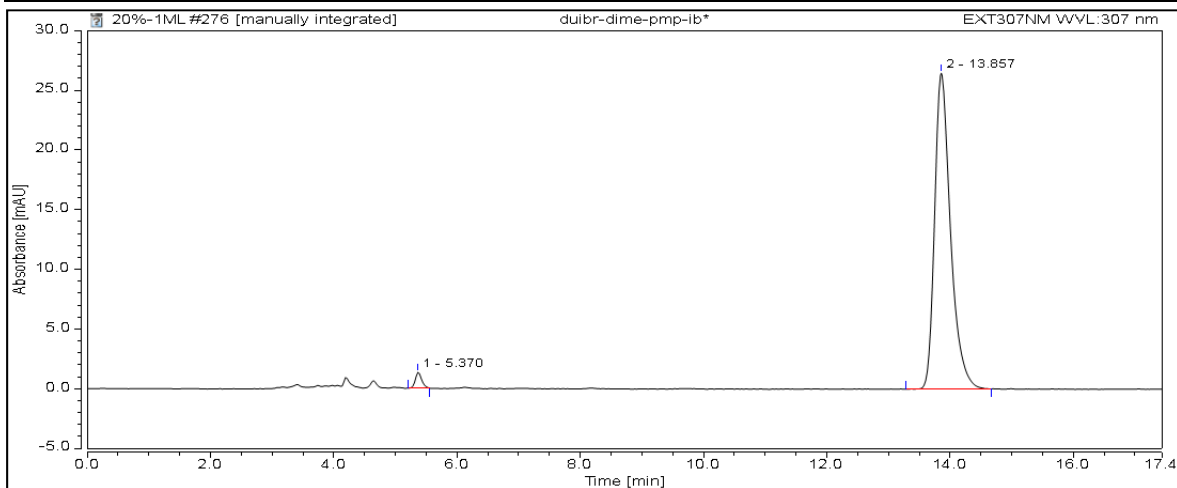

### Integration Results

| No.           | Peak Name | Retention Time<br>min | Area<br>mAU*min | Relative Area<br>% | Amount<br>n.a. |
|---------------|-----------|-----------------------|-----------------|--------------------|----------------|
| 1             |           | 5.370                 | 0.161           | 2.00               | n.a.           |
| 2             |           | 13.857                | 7.899           | 98.00              | n.a.           |
| <b>Total:</b> |           |                       | <b>8.060</b>    | <b>100.00</b>      |                |

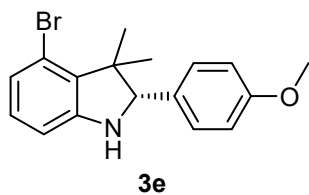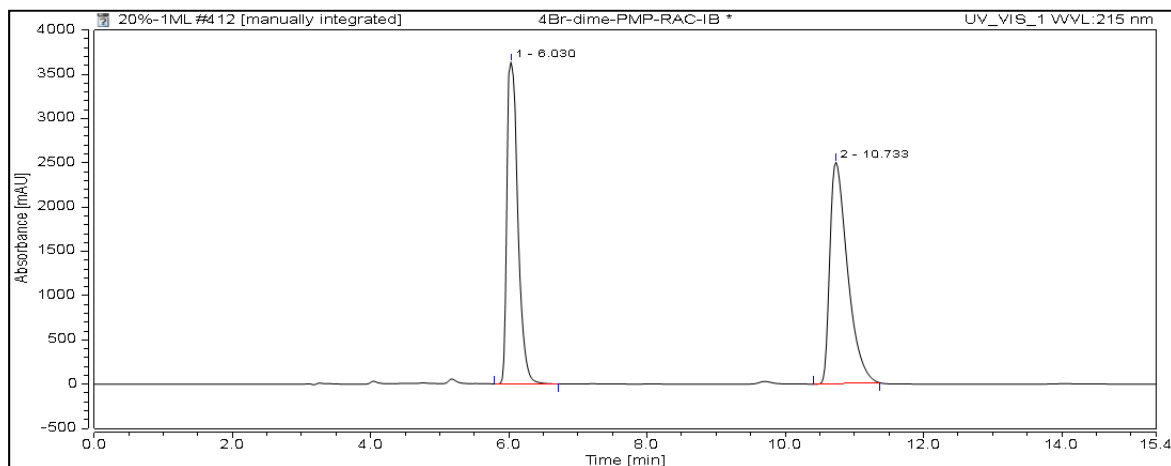

### Integration Results

| No.           | Peak Name | Retention Time<br>min | Area<br>mAU*min | Relative Area<br>% | Amount<br>n.a. |
|---------------|-----------|-----------------------|-----------------|--------------------|----------------|
| 1             |           | 6.030                 | 667.885         | 47.37              | n.a.           |
| 2             |           | 10.733                | 742.144         | 52.63              | n.a.           |
| <b>Total:</b> |           |                       | <b>1410.029</b> | <b>100.00</b>      |                |

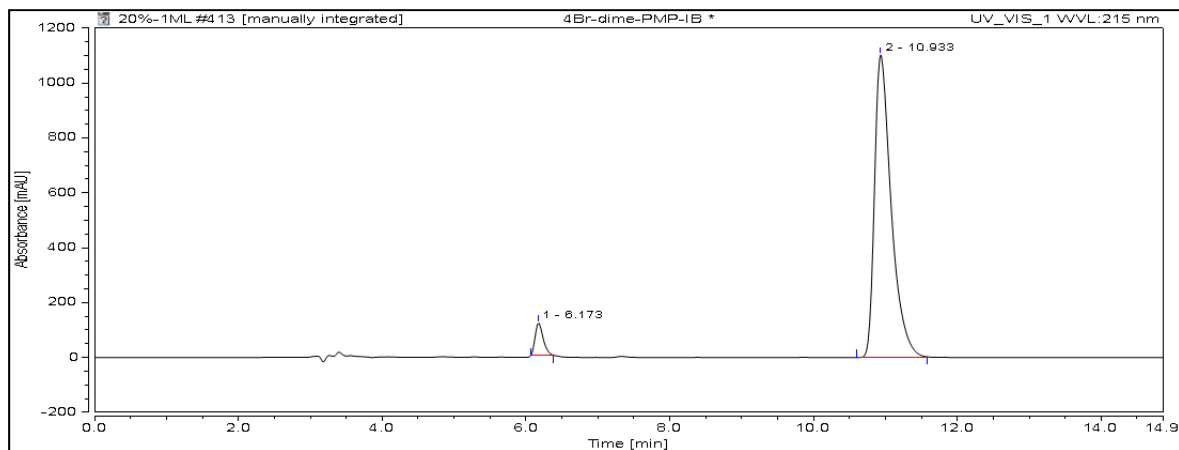

### Integration Results

| No.           | Peak Name | Retention Time<br>min | Area<br>mAU*min | Relative Area<br>% | Amount<br>n.a. |
|---------------|-----------|-----------------------|-----------------|--------------------|----------------|
| 1             |           | 6.173                 | 15.485          | 4.98               | n.a.           |
| 2             |           | 10.933                | 295.613         | 95.02              | n.a.           |
| <b>Total:</b> |           |                       | <b>311.098</b>  | <b>100.00</b>      |                |

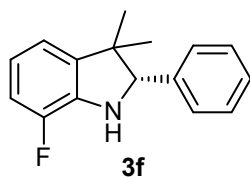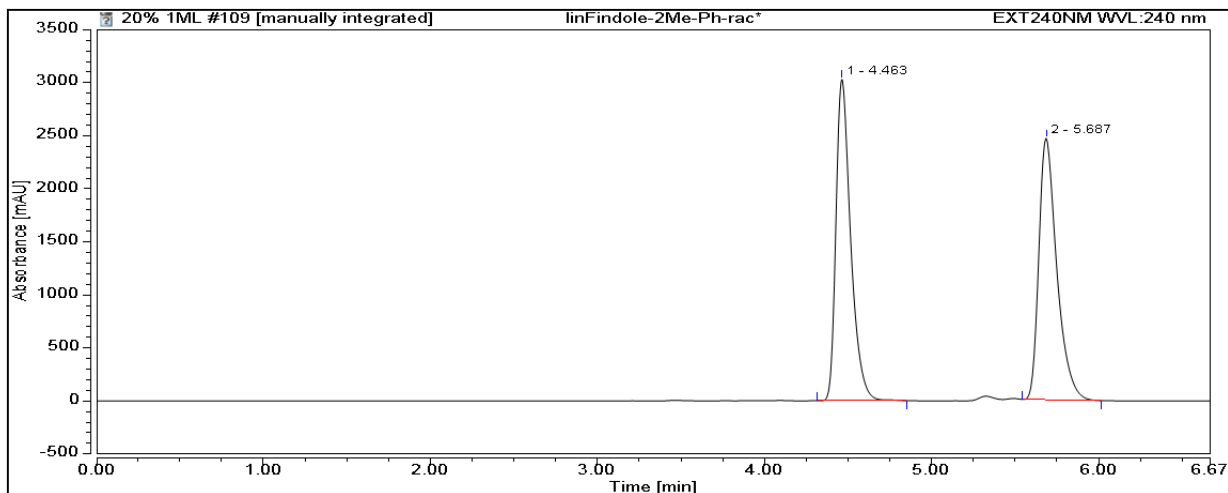

### Integration Results

| No.    | Peak Name | Retention Time<br>min | Area<br>mAU*min | Relative Area<br>% | Amount<br>n.a. |
|--------|-----------|-----------------------|-----------------|--------------------|----------------|
| 1      |           | 4.463                 | 308.375         | 50.09              | n.a.           |
| 2      |           | 5.687                 | 307.212         | 49.91              | n.a.           |
| Total: |           |                       | 615.587         | 100.00             |                |

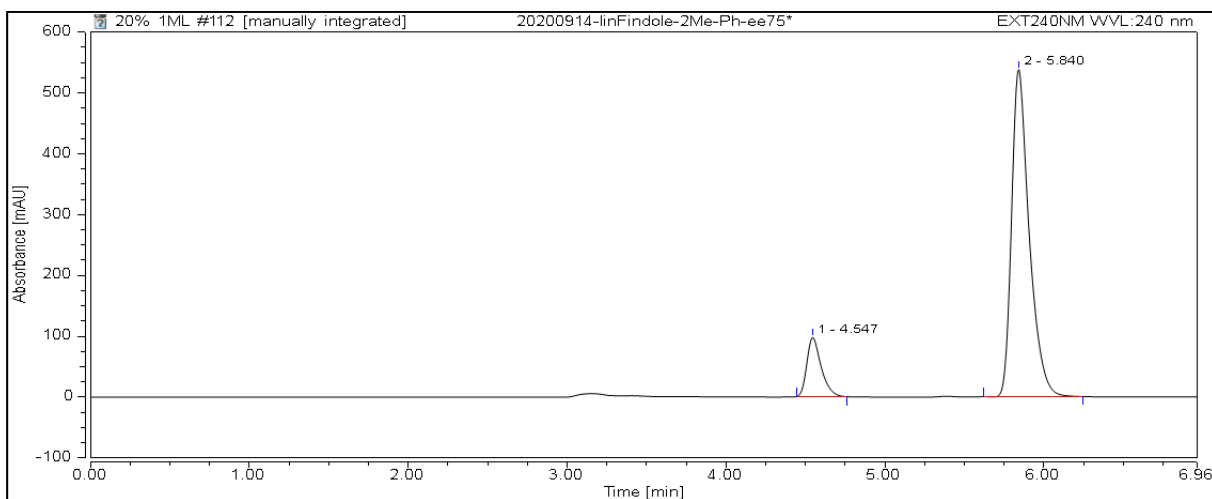

### Integration Results

| No.    | Peak Name | Retention Time<br>min | Area<br>mAU*min | Relative Area<br>% | Amount<br>n.a. |
|--------|-----------|-----------------------|-----------------|--------------------|----------------|
| 1      |           | 4.547                 | 10.152          | 12.82              | n.a.           |
| 2      |           | 5.840                 | 69.038          | 87.18              | n.a.           |
| Total: |           |                       | 79.190          | 100.00             |                |

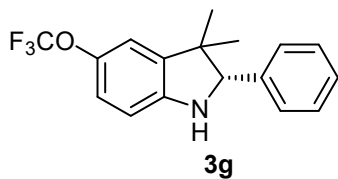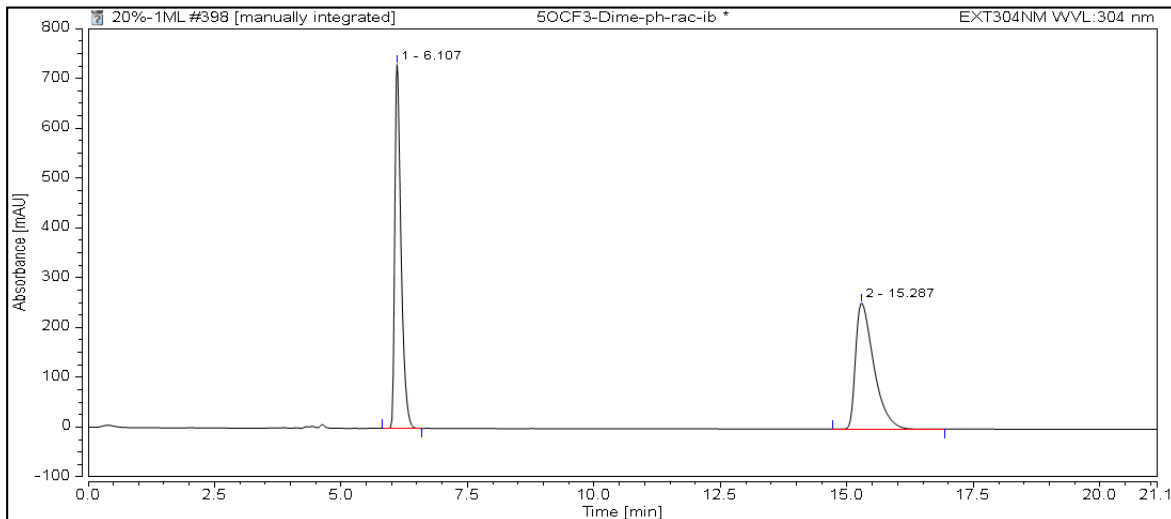

#### Integration Results

| No.           | Peak Name | Retention Time<br>min | Area<br>mAU*min | Relative Area<br>% | Amount<br>n.a. |
|---------------|-----------|-----------------------|-----------------|--------------------|----------------|
| 1             |           | 6.107                 | 104.778         | 49.94              | n.a.           |
| 2             |           | 15.287                | 105.010         | 50.06              | n.a.           |
| <b>Total:</b> |           |                       | <b>209.787</b>  | <b>100.00</b>      |                |

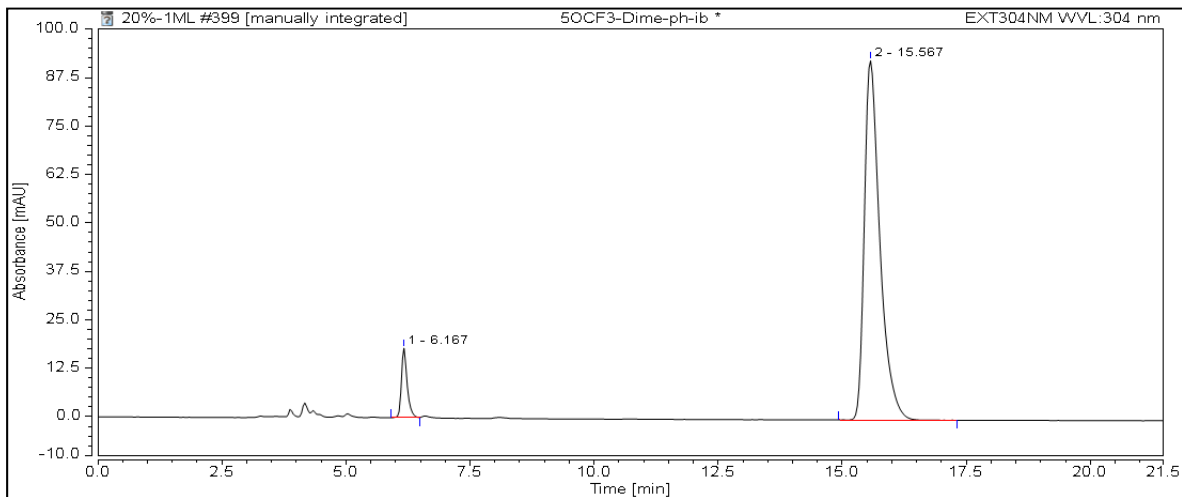

#### Integration Results

| No.           | Peak Name | Retention Time<br>min | Area<br>mAU*min | Relative Area<br>% | Amount<br>n.a. |
|---------------|-----------|-----------------------|-----------------|--------------------|----------------|
| 1             |           | 6.167                 | 2.404           | 6.66               | n.a.           |
| 2             |           | 15.567                | 33.714          | 93.34              | n.a.           |
| <b>Total:</b> |           |                       | <b>36.117</b>   | <b>100.00</b>      |                |

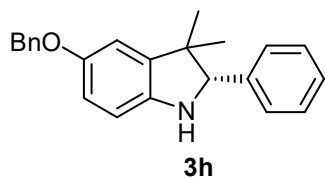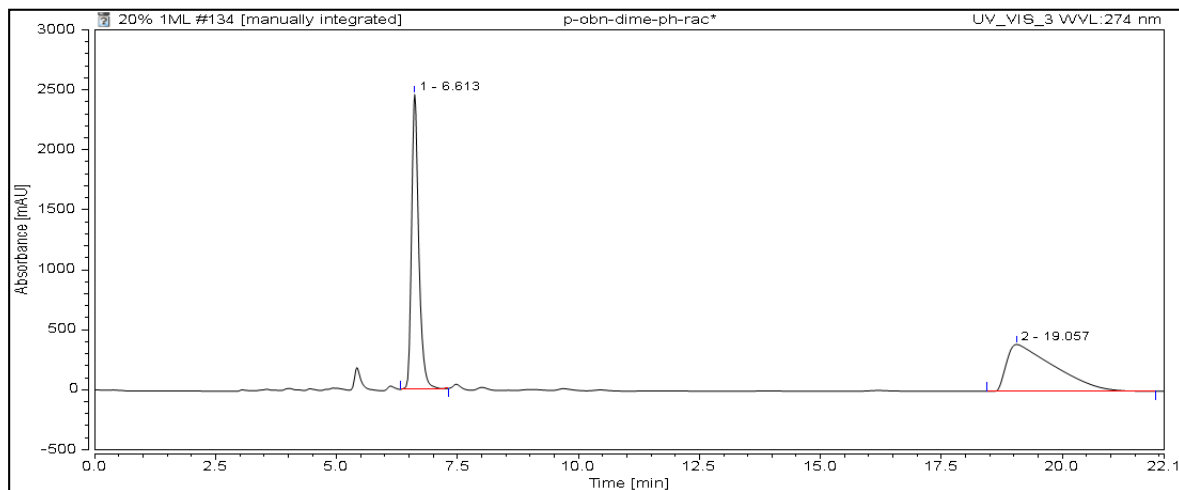

### Integration Results

| No.           | Peak Name | Retention Time<br>min | Area<br>mAU*min | Relative Area<br>% | Amount<br>n.a. |
|---------------|-----------|-----------------------|-----------------|--------------------|----------------|
| 1             |           | 6.613                 | 420.573         | 48.88              | n.a.           |
| 2             |           | 19.057                | 439.878         | 51.12              | n.a.           |
| <b>Total:</b> |           |                       | <b>860.450</b>  | <b>100.00</b>      |                |

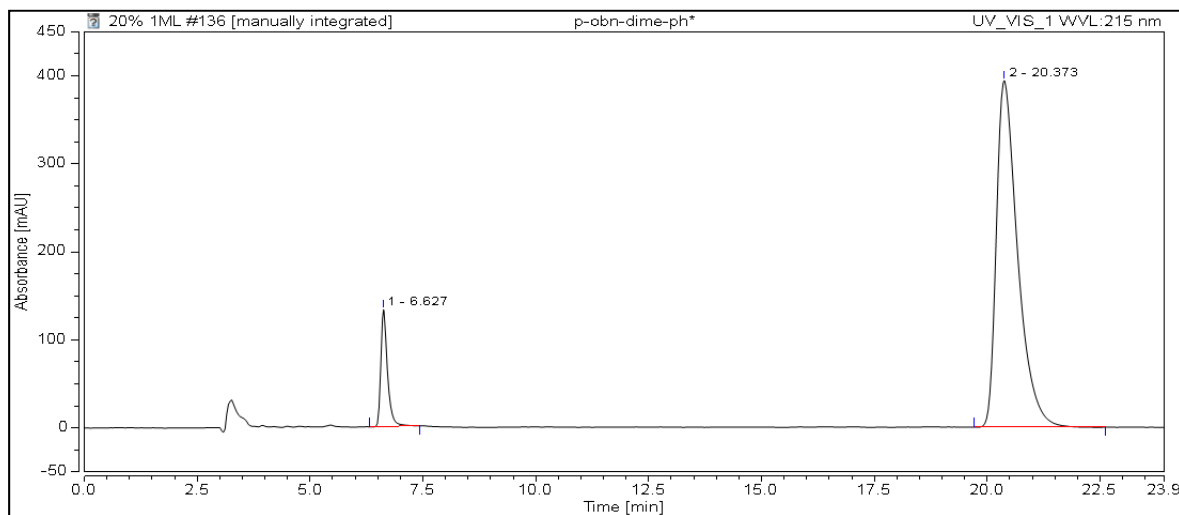

### Integration Results

| No.           | Peak Name | Retention Time<br>min | Area<br>mAU*min | Relative Area<br>% | Amount<br>n.a. |
|---------------|-----------|-----------------------|-----------------|--------------------|----------------|
| 1             |           | 6.627                 | 22.490          | 9.46               | n.a.           |
| 2             |           | 20.373                | 215.156         | 90.54              | n.a.           |
| <b>Total:</b> |           |                       | <b>237.646</b>  | <b>100.00</b>      |                |



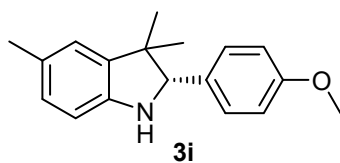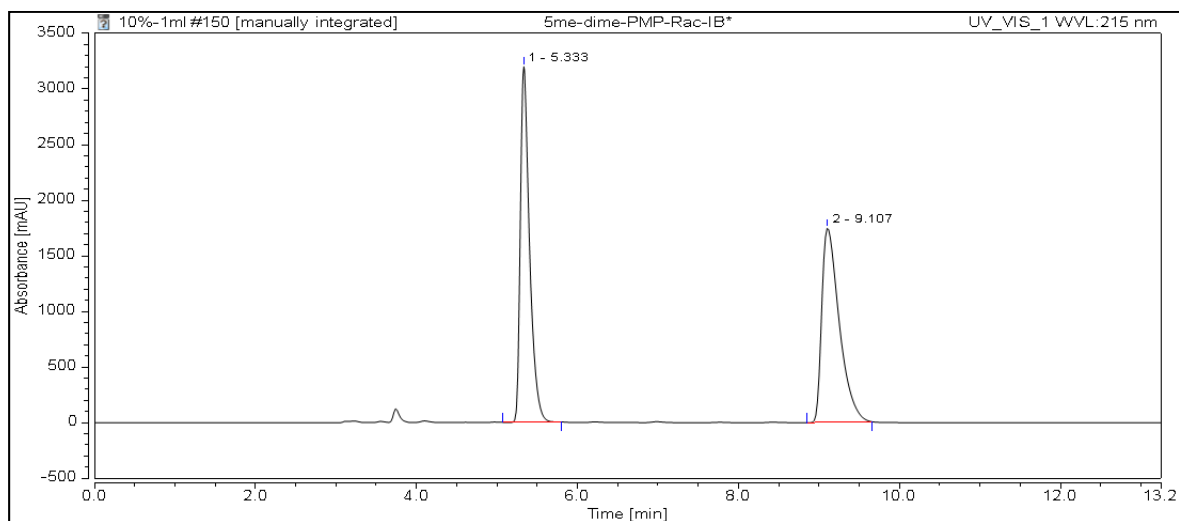

### Integration Results

| No.           | Peak Name | Retention Time<br>min | Area<br>mAU*min | Relative Area<br>% | Amount<br>n.a. |
|---------------|-----------|-----------------------|-----------------|--------------------|----------------|
| 1             |           | 5.333                 | 422.748         | 49.02              | n.a.           |
| 2             |           | 9.107                 | 439.615         | 50.98              | n.a.           |
| <b>Total:</b> |           |                       | <b>862.362</b>  | <b>100.00</b>      |                |

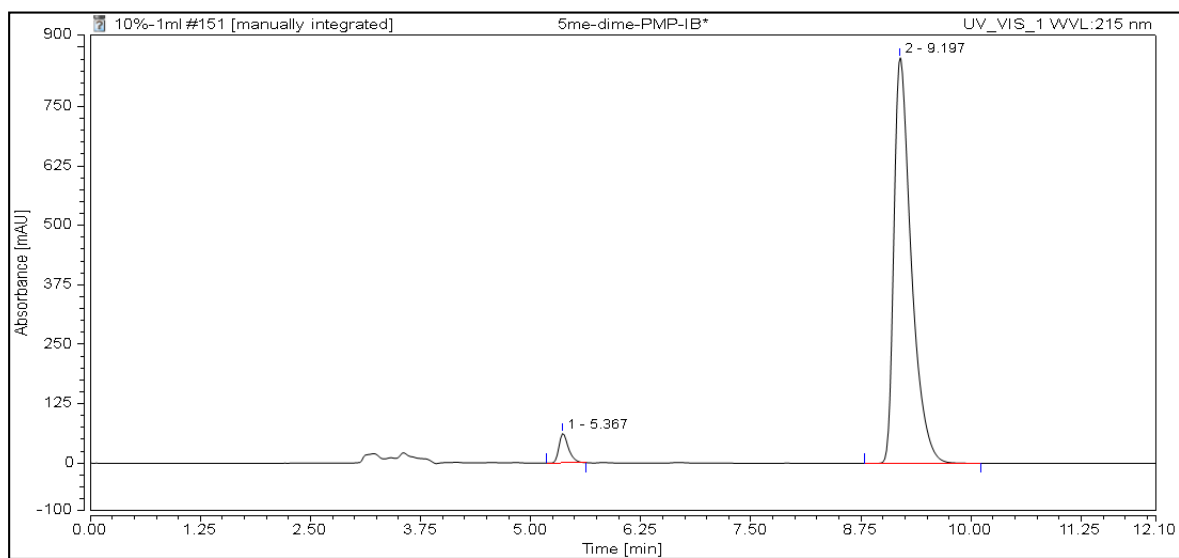

### Integration Results

| No.           | Peak Name | Retention Time<br>min | Area<br>mAU*min | Relative Area<br>% | Amount<br>n.a. |
|---------------|-----------|-----------------------|-----------------|--------------------|----------------|
| 1             |           | 5.367                 | 7.762           | 3.83               | n.a.           |
| 2             |           | 9.197                 | 195.119         | 96.17              | n.a.           |
| <b>Total:</b> |           |                       | <b>202.881</b>  | <b>100.00</b>      |                |

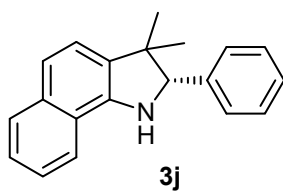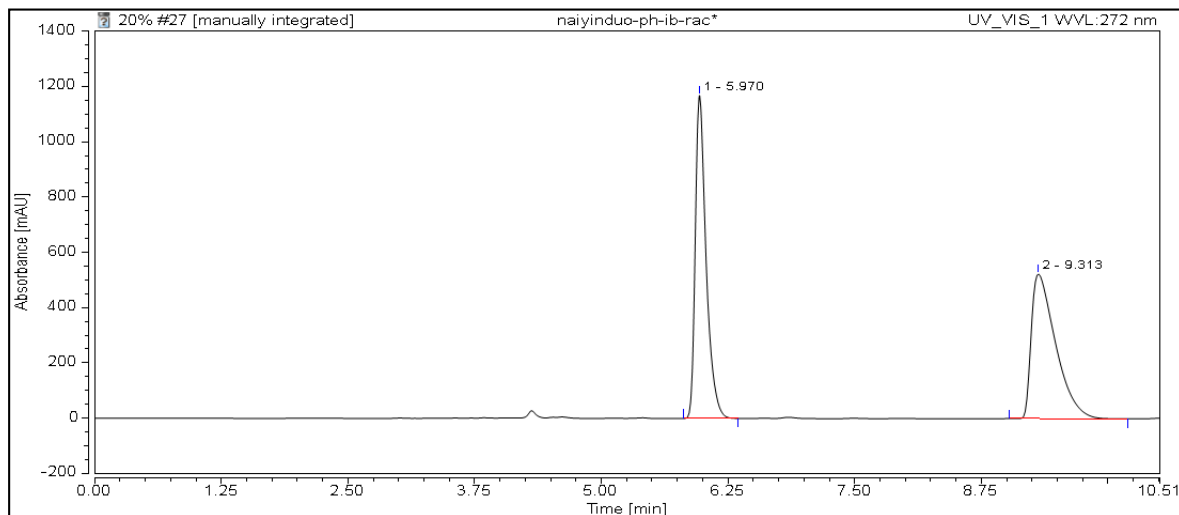

### Integration Results

| No.           | Peak Name | Retention Time<br>min | Area<br>mAU*min | Relative Area<br>% | Amount<br>n.a. |
|---------------|-----------|-----------------------|-----------------|--------------------|----------------|
| 1             |           | 5.970                 | 144.679         | 49.95              | n.a.           |
| 2             |           | 9.313                 | 144.977         | 50.05              | n.a.           |
| <b>Total:</b> |           |                       | <b>289.656</b>  | <b>100.00</b>      |                |

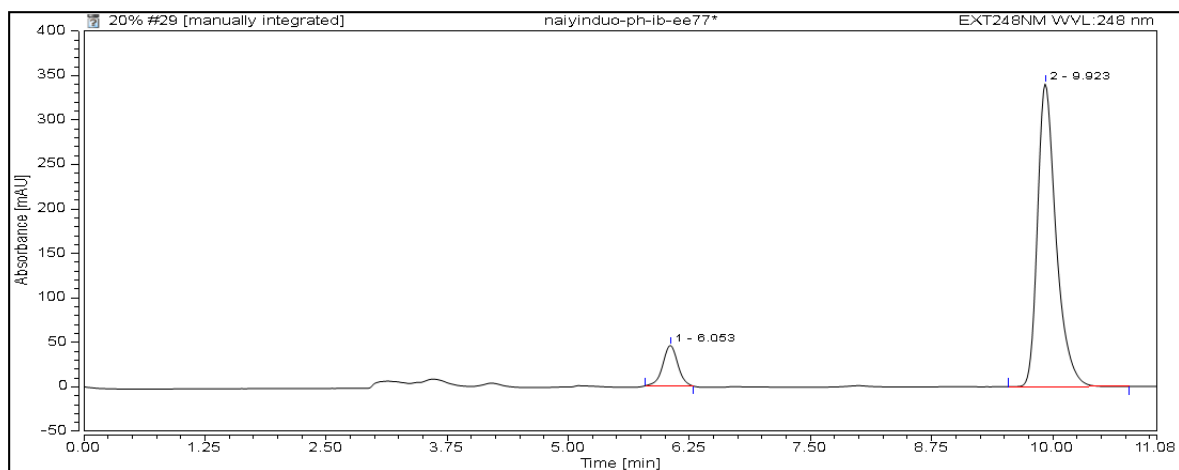

### Integration Results

| No.           | Peak Name | Retention Time<br>min | Area<br>mAU*min | Relative Area<br>% | Amount<br>n.a. |
|---------------|-----------|-----------------------|-----------------|--------------------|----------------|
| 1             |           | 6.053                 | 8.167           | 9.75               | n.a.           |
| 2             |           | 9.923                 | 75.621          | 90.25              | n.a.           |
| <b>Total:</b> |           |                       | <b>83.787</b>   | <b>100.00</b>      |                |

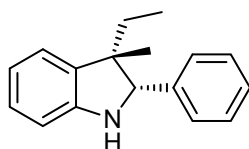

5a

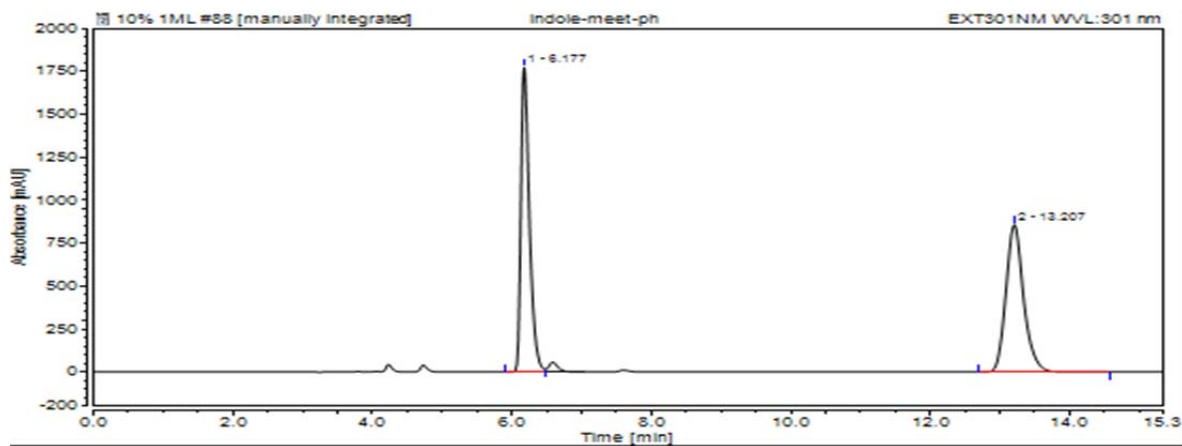

#### Integration Results

| No.           | Peak Name | Retention Time<br>min | Area<br>mAU*min | Relative Area<br>% | Amount<br>n.a. |
|---------------|-----------|-----------------------|-----------------|--------------------|----------------|
| 1             |           | 6.177                 | 249.239         | 49.77              | n.a.           |
| 2             |           | 13.207                | 251.567         | 50.23              | n.a.           |
| <b>Total:</b> |           |                       | <b>500.806</b>  | <b>100.00</b>      |                |

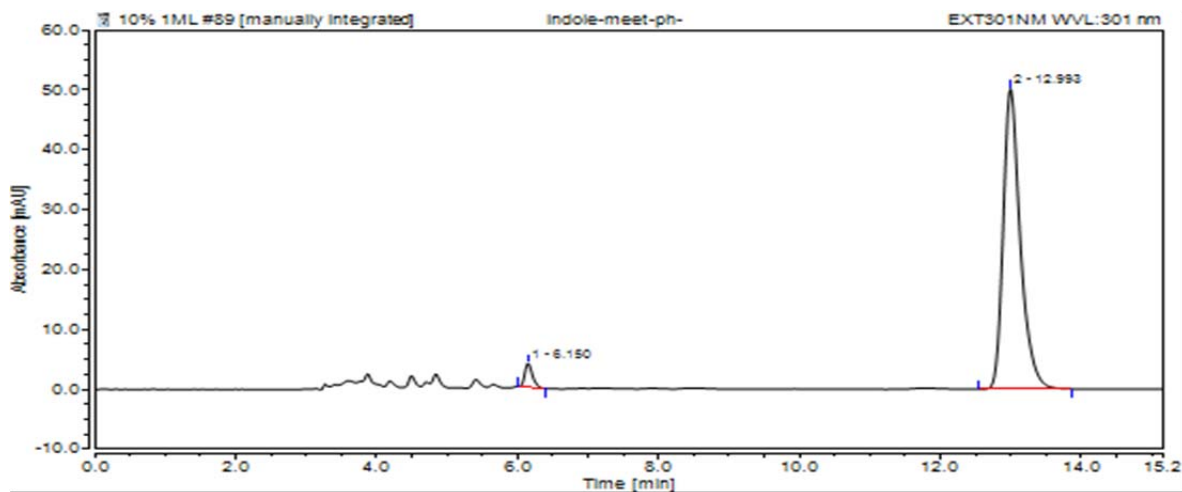

#### Integration Results

| No.           | Peak Name | Retention Time<br>min | Area<br>mAU*min | Relative Area<br>% | Amount<br>n.a. |
|---------------|-----------|-----------------------|-----------------|--------------------|----------------|
| 1             |           | 6.150                 | 0.507           | 3.48               | n.a.           |
| 2             |           | 12.993                | 14.065          | 96.52              | n.a.           |
| <b>Total:</b> |           |                       | <b>14.572</b>   | <b>100.00</b>      |                |

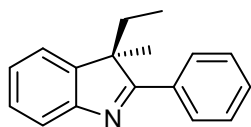

**6a**

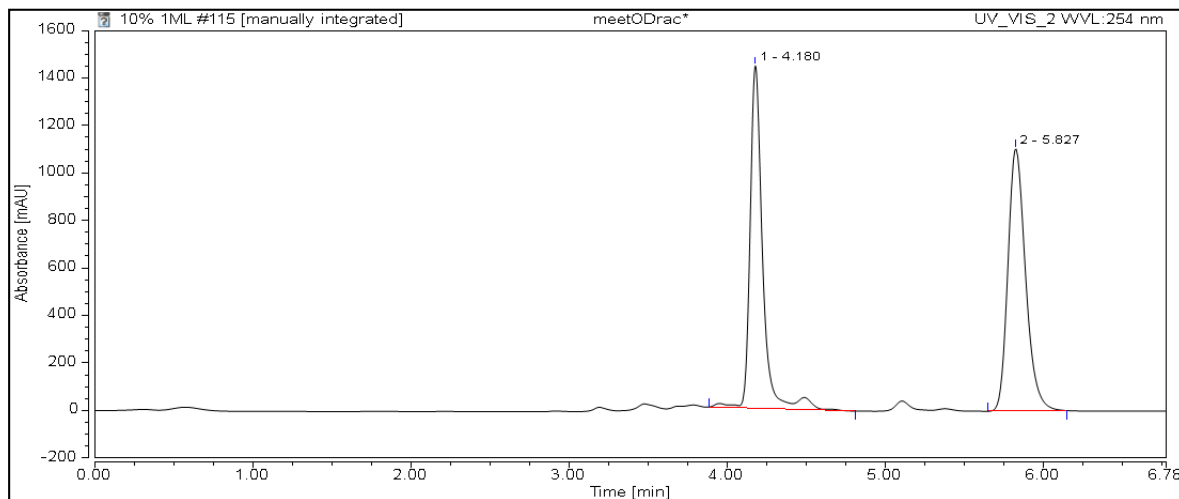

### Integration Results

| No.           | Peak Name | Retention Time<br>min | Area<br>mAU*min | Relative Area<br>% | Amount<br>n.a. |
|---------------|-----------|-----------------------|-----------------|--------------------|----------------|
| 1             |           | 4.180                 | 133.769         | 48.33              | n.a.           |
| 2             |           | 5.827                 | 143.001         | 51.67              | n.a.           |
| <b>Total:</b> |           |                       | <b>276.770</b>  | <b>100.00</b>      |                |

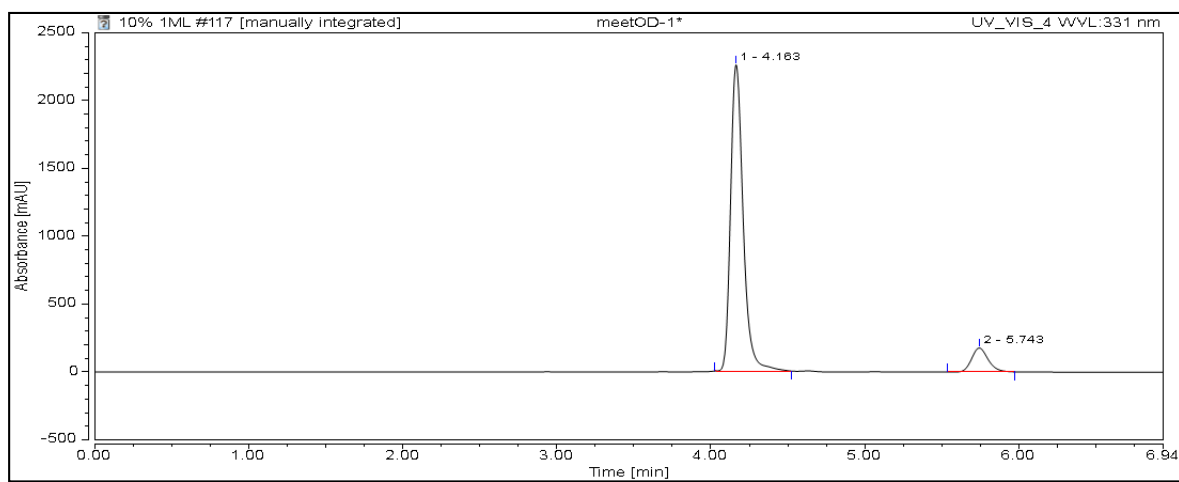

### Integration Results

| No.           | Peak Name | Retention Time<br>min | Area<br>mAU*min | Relative Area<br>% | Amount<br>n.a. |
|---------------|-----------|-----------------------|-----------------|--------------------|----------------|
| 1             |           | 4.163                 | 213.500         | 90.66              | n.a.           |
| 2             |           | 5.743                 | 22.007          | 9.34               | n.a.           |
| <b>Total:</b> |           |                       | <b>235.507</b>  | <b>100.00</b>      |                |

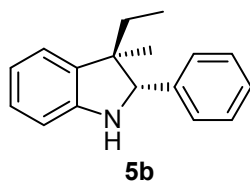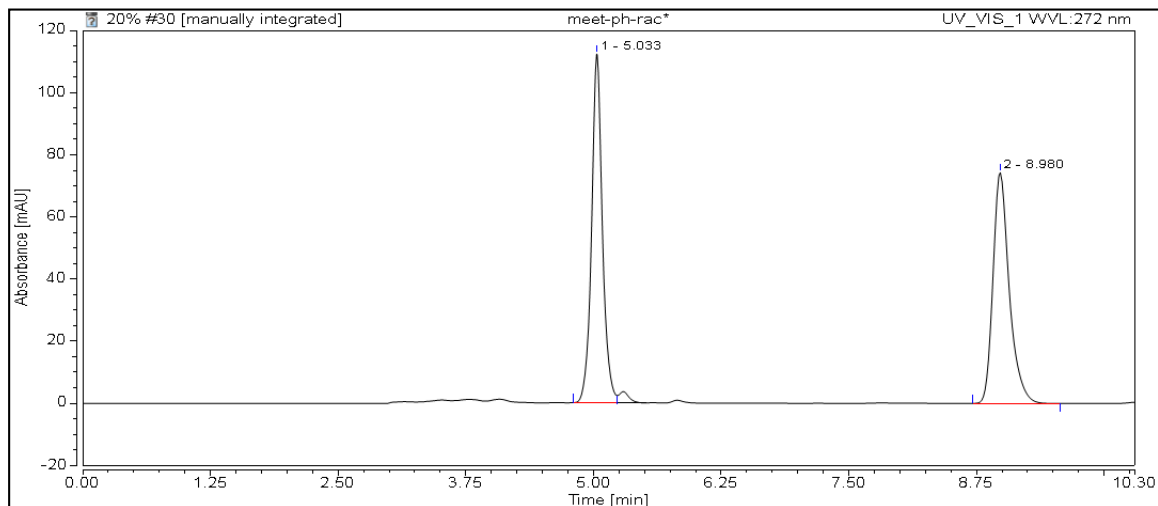

#### Integration Results

| No.           | Peak Name | Retention Time<br>min | Area<br>mAU*min | Relative Area<br>% | Amount<br>n.a. |
|---------------|-----------|-----------------------|-----------------|--------------------|----------------|
| 1             |           | 5.033                 | 13.741          | 50.03              | n.a.           |
| 2             |           | 8.980                 | 13.727          | 49.97              | n.a.           |
| <b>Total:</b> |           |                       | <b>27.469</b>   | <b>100.00</b>      |                |

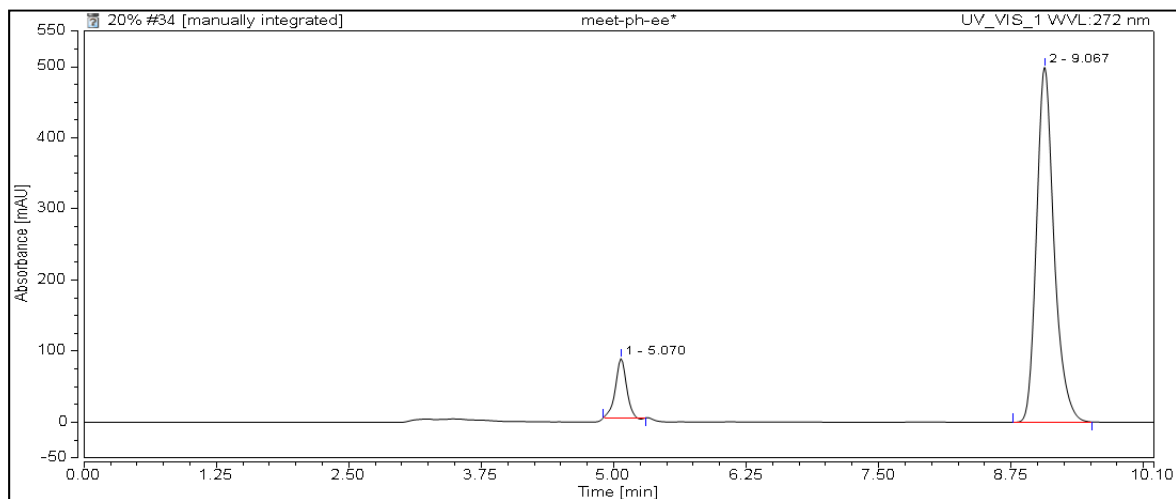

#### Integration Results

| No.           | Peak Name | Retention Time<br>min | Area<br>mAU*min | Relative Area<br>% | Amount<br>n.a. |
|---------------|-----------|-----------------------|-----------------|--------------------|----------------|
| 1             |           | 5.070                 | 9.930           | 9.39               | n.a.           |
| 2             |           | 9.067                 | 95.818          | 90.61              | n.a.           |
| <b>Total:</b> |           |                       | <b>105.748</b>  | <b>100.00</b>      |                |

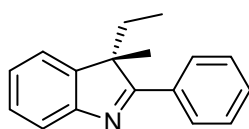

**6b**

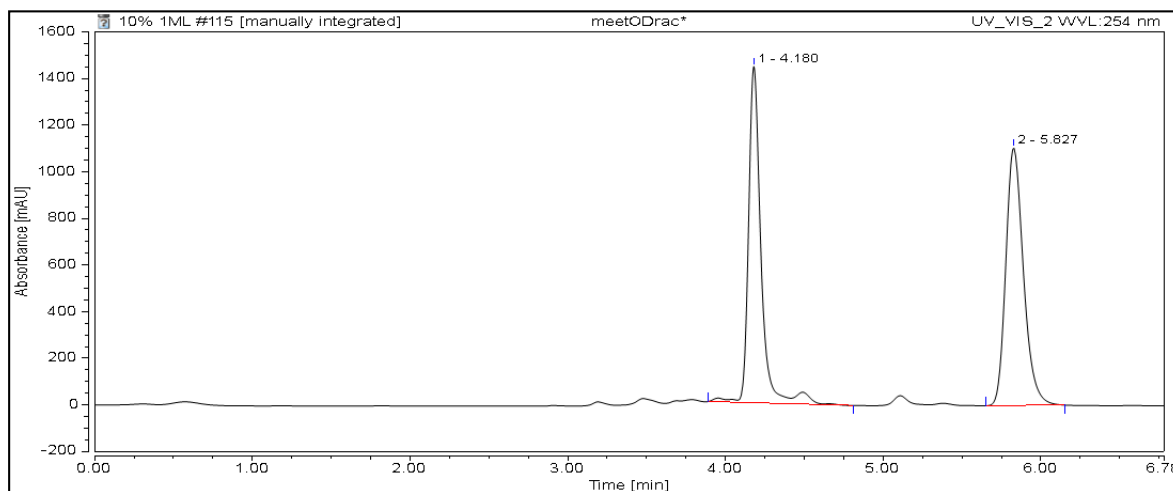

### Integration Results

| No.           | Peak Name | Retention Time<br>min | Area<br>mAU*min | Relative Area<br>% | Amount<br>n.a. |
|---------------|-----------|-----------------------|-----------------|--------------------|----------------|
| 1             |           | 4.180                 | 133.769         | 48.33              | n.a.           |
| 2             |           | 5.827                 | 143.001         | 51.67              | n.a.           |
| <b>Total:</b> |           |                       | <b>276.770</b>  | <b>100.00</b>      |                |

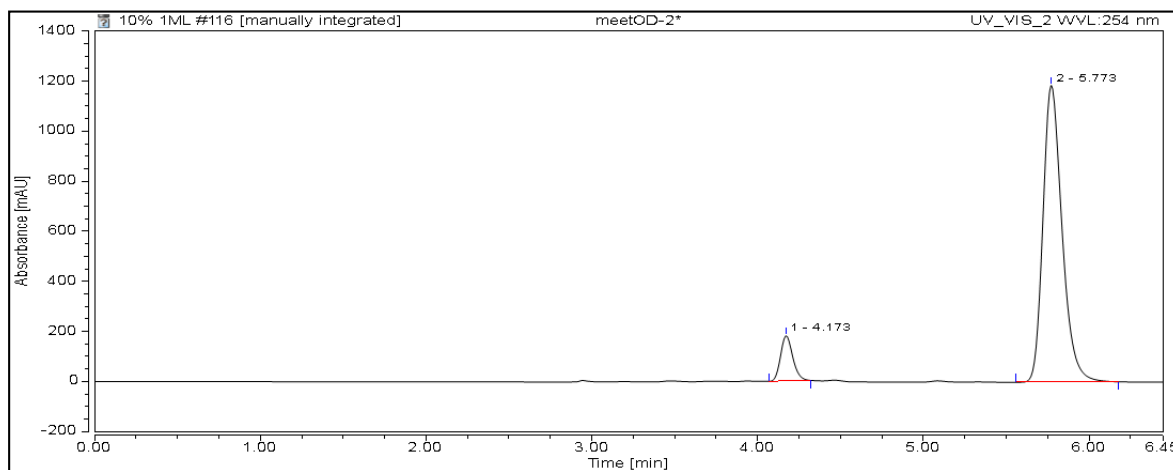

### Integration Results

| No.           | Peak Name | Retention Time<br>min | Area<br>mAU*min | Relative Area<br>% | Amount<br>n.a. |
|---------------|-----------|-----------------------|-----------------|--------------------|----------------|
| 1             |           | 4.173                 | 15.443          | 8.89               | n.a.           |
| 2             |           | 5.773                 | 158.253         | 91.11              | n.a.           |
| <b>Total:</b> |           |                       | <b>173.697</b>  | <b>100.00</b>      |                |

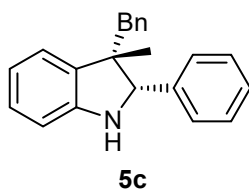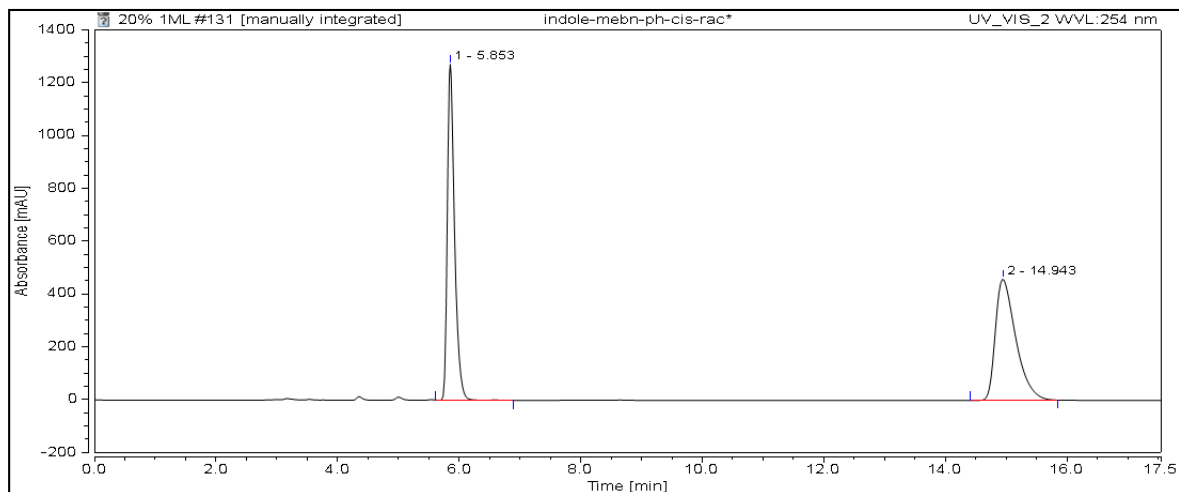

#### Integration Results

| No.           | Peak Name | Retention Time<br>min | Area<br>mAU*min | Relative Area<br>% | Amount<br>n.a. |
|---------------|-----------|-----------------------|-----------------|--------------------|----------------|
| 1             |           | 5.853                 | 174.208         | 49.47              | n.a.           |
| 2             |           | 14.943                | 177.937         | 50.53              | n.a.           |
| <b>Total:</b> |           |                       | <b>352.145</b>  | <b>100.00</b>      |                |

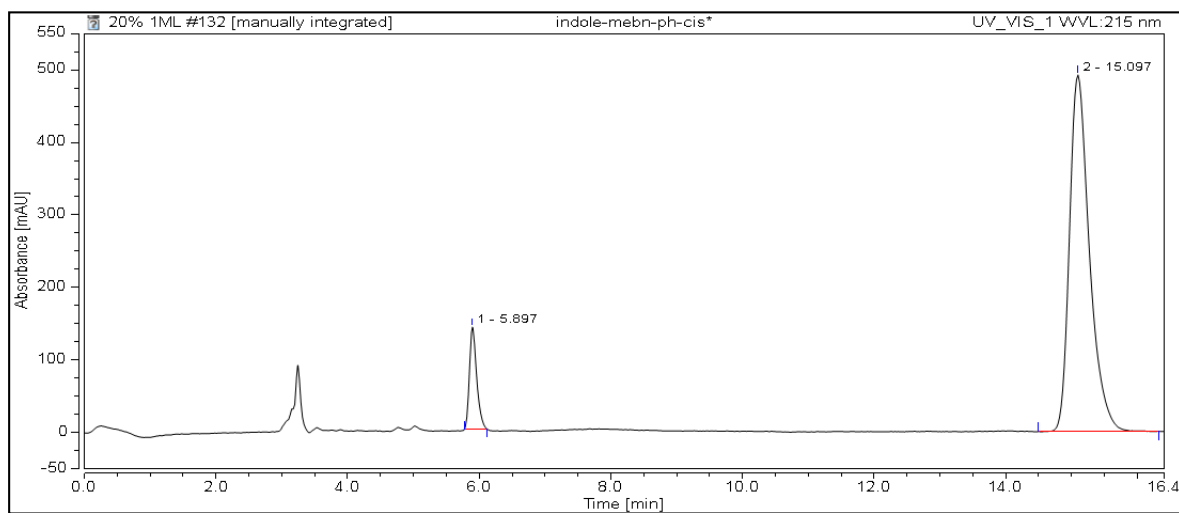

#### Integration Results

| No.           | Peak Name | Retention Time<br>min | Area<br>mAU*min | Relative Area<br>% | Amount<br>n.a. |
|---------------|-----------|-----------------------|-----------------|--------------------|----------------|
| 1             |           | 5.897                 | 17.960          | 9.42               | n.a.           |
| 2             |           | 15.097                | 172.760         | 90.58              | n.a.           |
| <b>Total:</b> |           |                       | <b>190.720</b>  | <b>100.00</b>      |                |

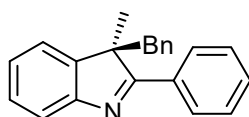

**6c**

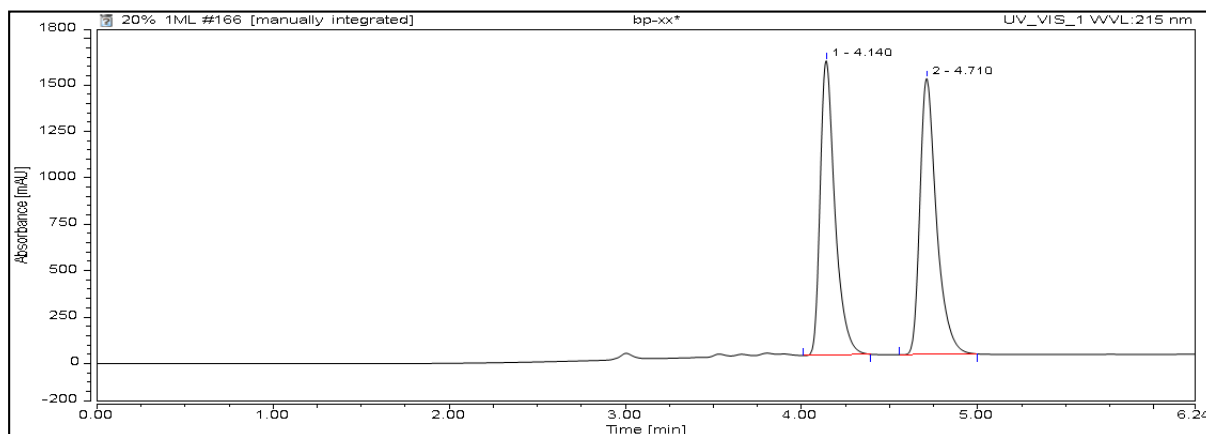

### Integration Results

| No.           | Peak Name | Retention Time<br>min | Area<br>mAU*min | Relative Area<br>% | Amount<br>n.a. |
|---------------|-----------|-----------------------|-----------------|--------------------|----------------|
| 1             |           | 4.140                 | 153.921         | 48.78              | n.a.           |
| 2             |           | 4.710                 | 161.627         | 51.22              | n.a.           |
| <b>Total:</b> |           |                       | <b>315.548</b>  | <b>100.00</b>      |                |

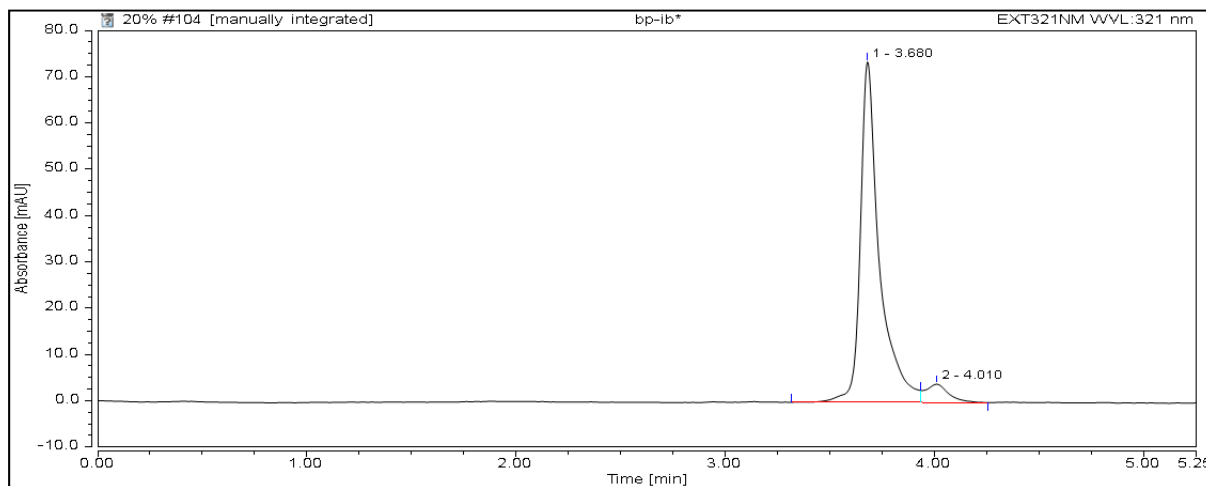

### Integration Results

| No.           | Peak Name | Retention Time<br>min | Area<br>mAU*min | Relative Area<br>% | Amount<br>n.a. |
|---------------|-----------|-----------------------|-----------------|--------------------|----------------|
| 1             |           | 3.680                 | 7.772           | 93.92              | n.a.           |
| 2             |           | 4.010                 | 0.503           | 6.08               | n.a.           |
| <b>Total:</b> |           |                       | <b>8.275</b>    | <b>100.00</b>      |                |



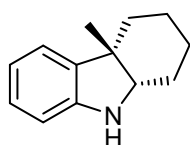

5d

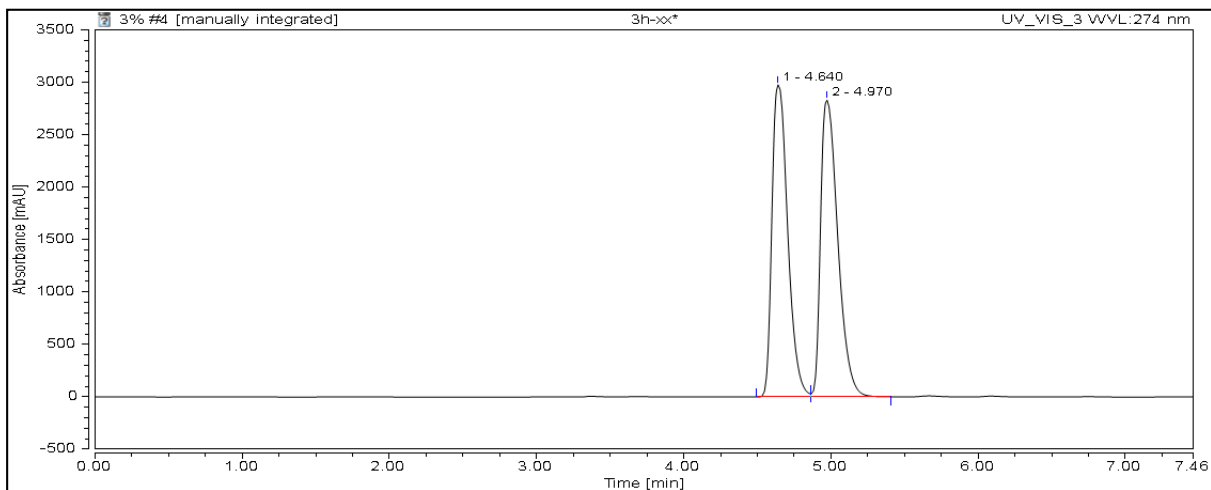

### Integration Results

| No.           | Peak Name | Retention Time<br>min | Area<br>mAU*min | Relative<br>Area<br>% | Amount<br>n.a. |
|---------------|-----------|-----------------------|-----------------|-----------------------|----------------|
| 1             |           | 4.640                 | 369.246         | 49.08                 | n.a.           |
| 2             |           | 4.970                 | 383.055         | 50.92                 | n.a.           |
| <b>Total:</b> |           |                       | <b>752.301</b>  | <b>100.00</b>         |                |

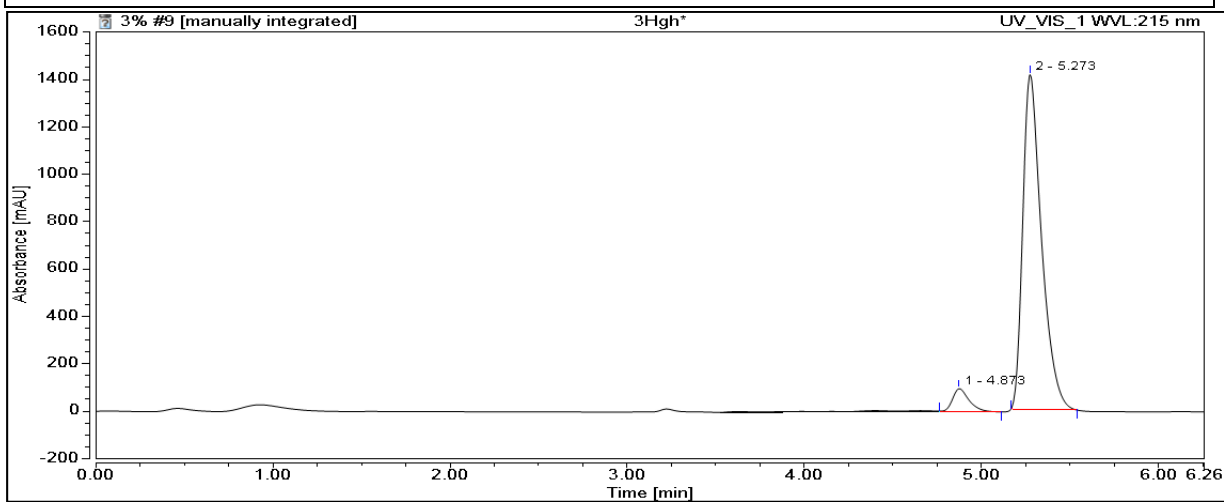

| No.           | Peak Name | Retention Time<br>min | Area<br>mAU*min | Relative<br>Area<br>% | Amount<br>n.a. |
|---------------|-----------|-----------------------|-----------------|-----------------------|----------------|
| 1             |           | 4.873                 | 10.754          | 5.84                  | n.a.           |
| 2             |           | 5.273                 | 173.387         | 94.16                 | n.a.           |
| <b>Total:</b> |           |                       | <b>184.142</b>  | <b>100.00</b>         |                |

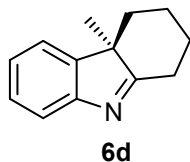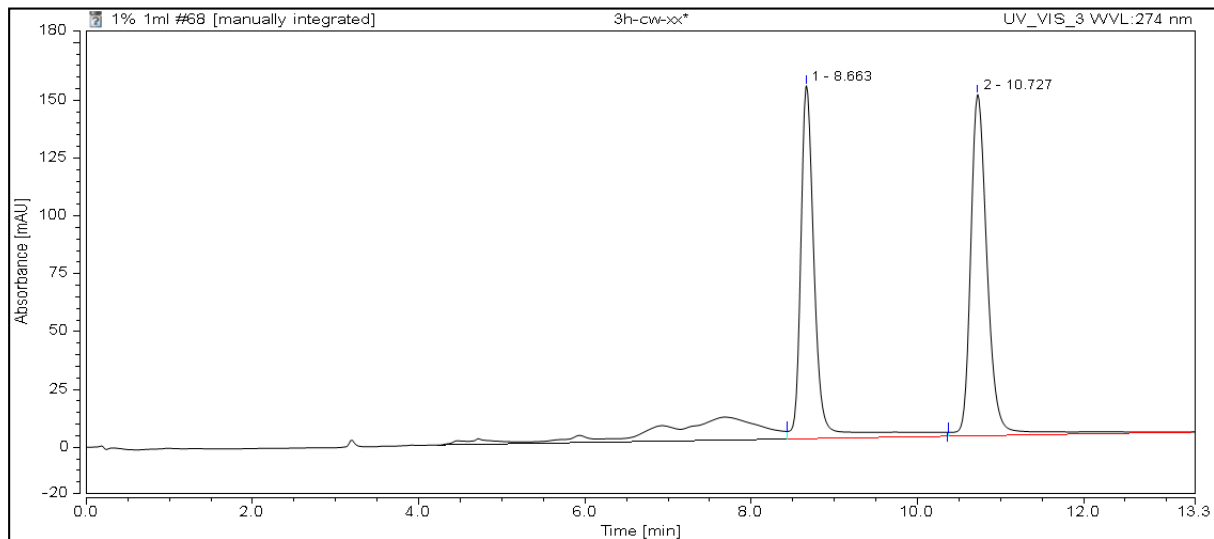

### Integration Results

| No.           | Peak Name | Retention Time<br>min | Area<br>mAU*min | Relative<br>Area<br>% | Amount<br>n.a. |
|---------------|-----------|-----------------------|-----------------|-----------------------|----------------|
| 1             |           | 8.663                 | 30.716          | 46.80                 | n.a.           |
| 2             |           | 10.727                | 34.922          | 53.20                 | n.a.           |
| <b>Total:</b> |           |                       | <b>65.639</b>   | <b>100.00</b>         |                |

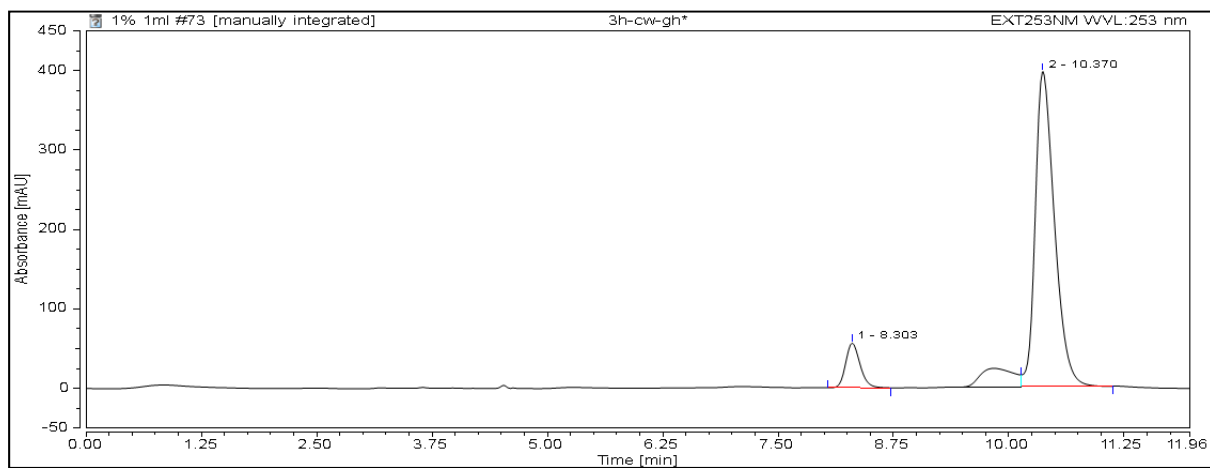

### Integration Results

| No.           | Peak Name | Retention Time<br>min | Area<br>mAU*min | Relative<br>Area<br>% | Amount<br>n.a. |
|---------------|-----------|-----------------------|-----------------|-----------------------|----------------|
| 1             |           | 8.303                 | 10.126          | 9.57                  | n.a.           |
| 2             |           | 10.370                | 95.682          | 90.43                 | n.a.           |
| <b>Total:</b> |           |                       | <b>105.809</b>  | <b>100.00</b>         |                |

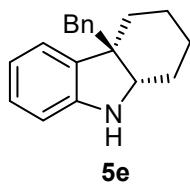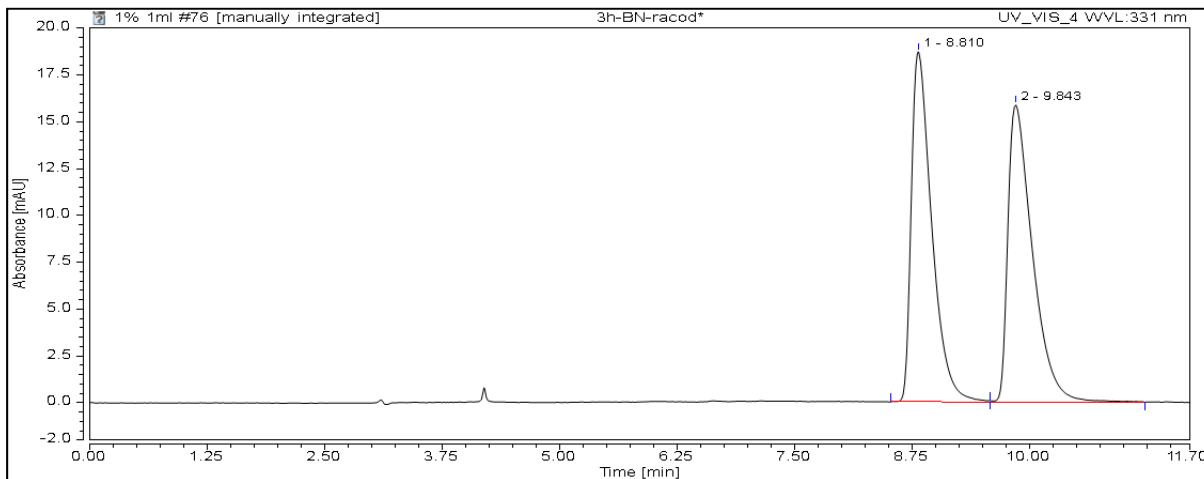

### Integration Results

| No.           | Peak Name | Retention Time<br>min | Area<br>mAU*min | Relative<br>Area<br>% | Amount<br>n.a. |
|---------------|-----------|-----------------------|-----------------|-----------------------|----------------|
| 1             |           | 8.810                 | 4.707           | 49.47                 | n.a.           |
| 2             |           | 9.843                 | 4.808           | 50.53                 | n.a.           |
| <b>Total:</b> |           |                       | <b>9.515</b>    | <b>100.00</b>         |                |

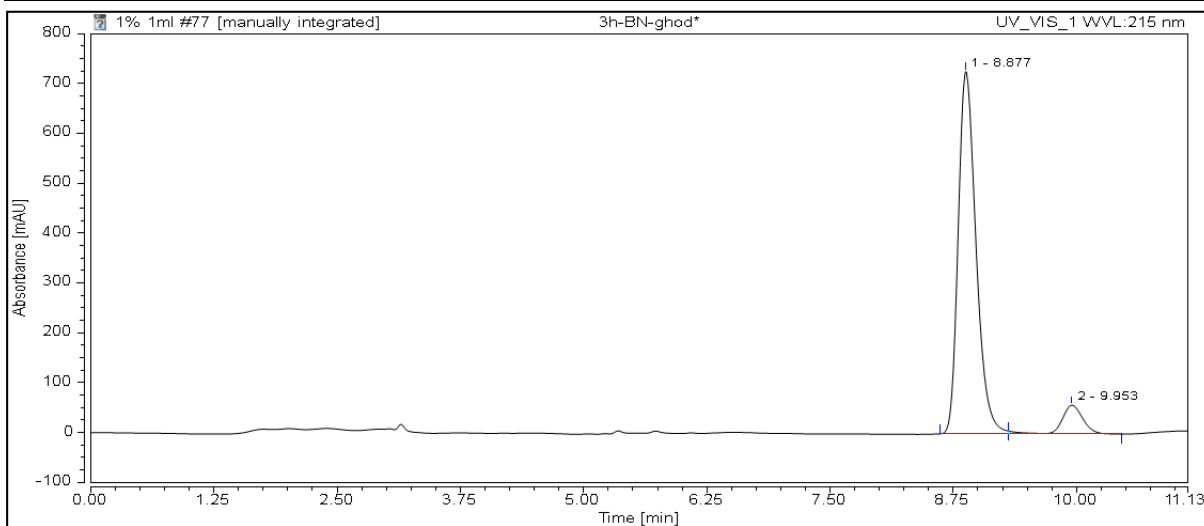

### Integration Results

| No.           | Peak Name | Retention Time<br>min | Area<br>mAU*min | Relative<br>Area<br>% | Amount<br>n.a. |
|---------------|-----------|-----------------------|-----------------|-----------------------|----------------|
| 1             |           | 8.877                 | 152.120         | 91.42                 | n.a.           |
| 2             |           | 9.953                 | 14.270          | 8.58                  | n.a.           |
| <b>Total:</b> |           |                       | <b>166.390</b>  | <b>100.00</b>         |                |

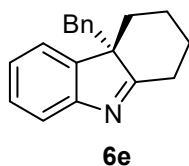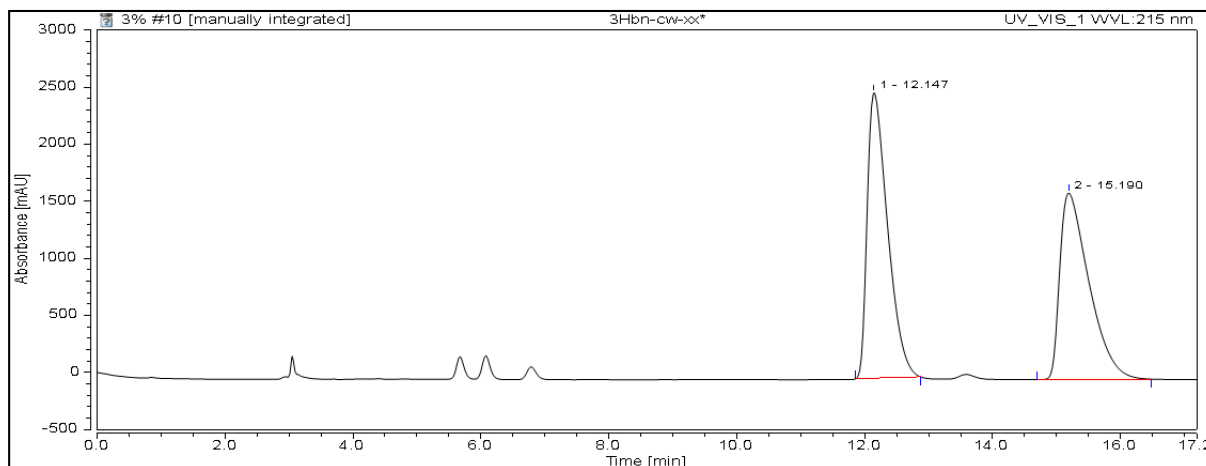

#### Integration Results

| No.           | Peak Name | Retention Time<br>min | Area<br>mAU*min | Relative<br>Area<br>% | Amount<br>n.a. |
|---------------|-----------|-----------------------|-----------------|-----------------------|----------------|
| 1             |           | 12.147                | 924.048         | 51.82                 | n.a.           |
| 2             |           | 15.190                | 859.231         | 48.18                 | n.a.           |
| <b>Total:</b> |           |                       | <b>1783.280</b> | <b>100.00</b>         |                |

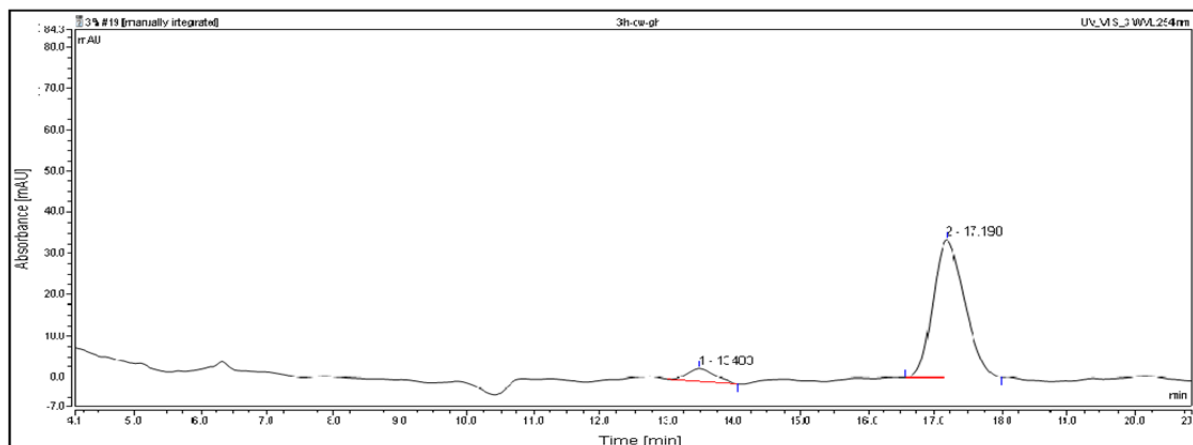

#### Integration Results

| No.           | Peak Name | Retention Time<br>min | Area<br>mAU*min | Relative<br>Area<br>% | Amount<br>n.a. |
|---------------|-----------|-----------------------|-----------------|-----------------------|----------------|
| 1             |           | 13.483                | 1.4577          | 7.37                  | n.a.           |
| 2             |           | 17.190                | 18.3214         | 92.63                 | n.a.           |
| <b>Total:</b> |           |                       | <b>19.7791</b>  | <b>100.00</b>         |                |

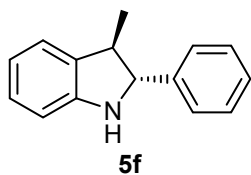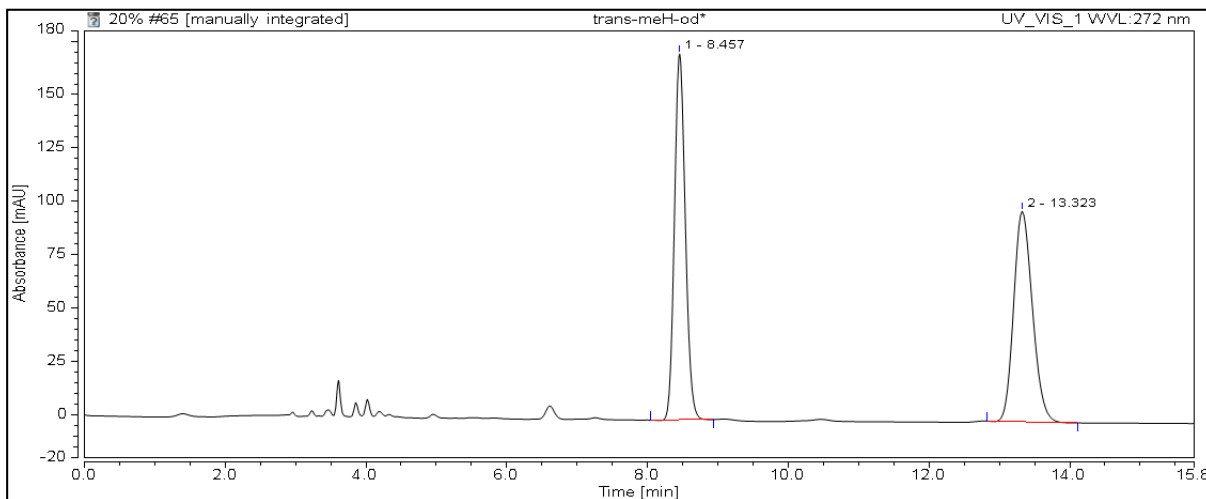

#### Integration Results

| No.           | Peak Name | Retention Time<br>min | Area<br>mAU*min | Relative<br>Area<br>% | Amount<br>n.a. |
|---------------|-----------|-----------------------|-----------------|-----------------------|----------------|
| 1             |           | 8.457                 | 30.600          | 50.19                 | n.a.           |
| 2             |           | 13.323                | 30.364          | 49.81                 | n.a.           |
| <b>Total:</b> |           |                       | <b>60.964</b>   | <b>100.00</b>         |                |

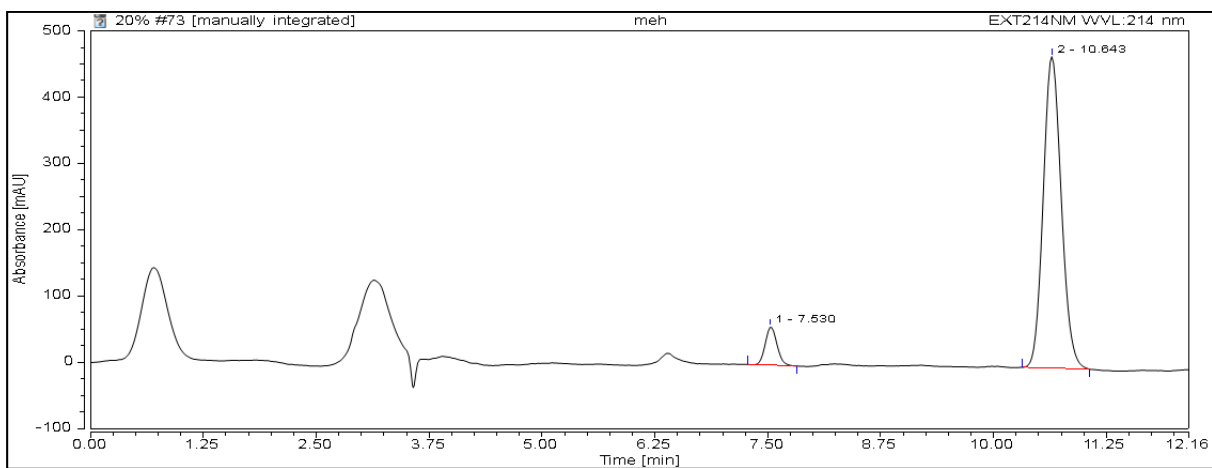

#### Integration Results

| No.           | Peak Name | Retention Time<br>min | Area<br>mAU*min | Relative<br>Area<br>% | Amount<br>n.a. |
|---------------|-----------|-----------------------|-----------------|-----------------------|----------------|
| 1             |           | 7.530                 | 8.651           | 7.34                  | n.a.           |
| 2             |           | 10.643                | 109.164         | 92.66                 | n.a.           |
| <b>Total:</b> |           |                       | <b>117.815</b>  | <b>100.00</b>         |                |

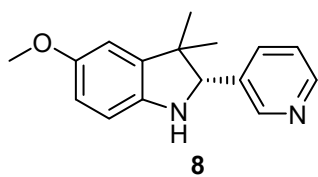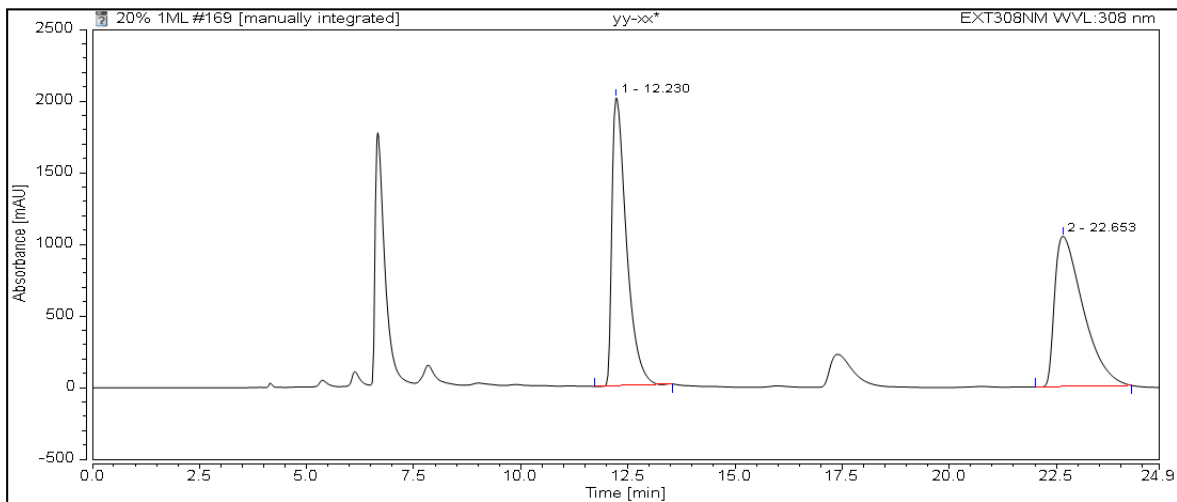

#### Integration Results

| No.           | Peak Name | Retention Time<br>min | Area<br>mAU*min | Relative Area<br>% | Amount<br>n.a. |
|---------------|-----------|-----------------------|-----------------|--------------------|----------------|
| 1             |           | 12.230                | 787.497         | 49.41              | n.a.           |
| 2             |           | 22.653                | 806.309         | 50.59              | n.a.           |
| <b>Total:</b> |           |                       | <b>1593.806</b> | <b>100.00</b>      |                |

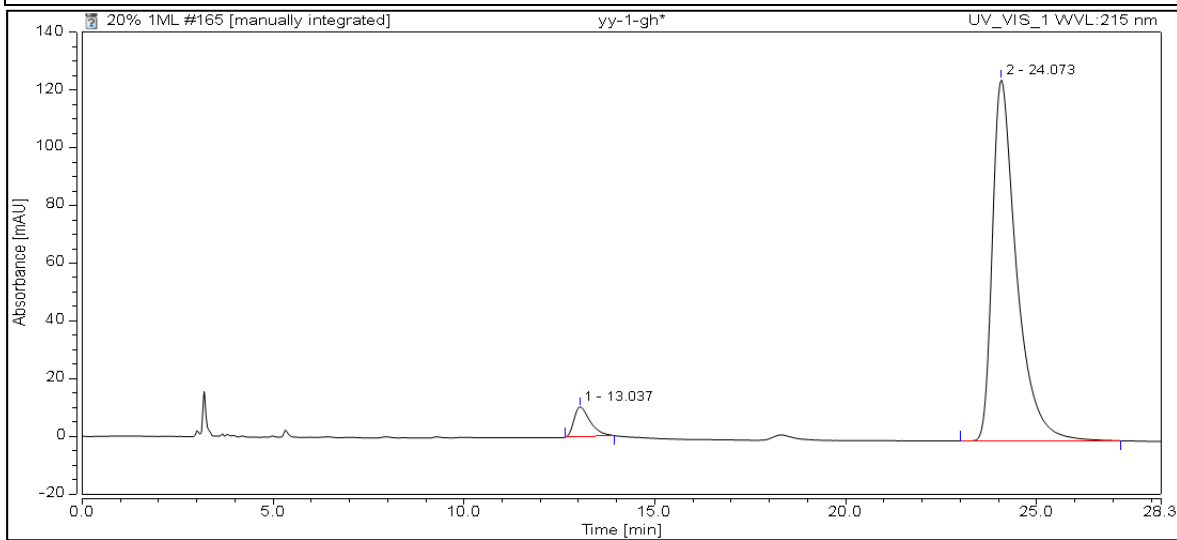

#### Integration Results

| No.           | Peak Name | Retention Time<br>min | Area<br>mAU*min | Relative Area<br>% | Amount<br>n.a. |
|---------------|-----------|-----------------------|-----------------|--------------------|----------------|
| 1             |           | 13.037                | 5.074           | 5.24               | n.a.           |
| 2             |           | 24.073                | 91.823          | 94.76              | n.a.           |
| <b>Total:</b> |           |                       | <b>96.897</b>   | <b>100.00</b>      |                |

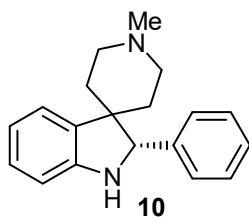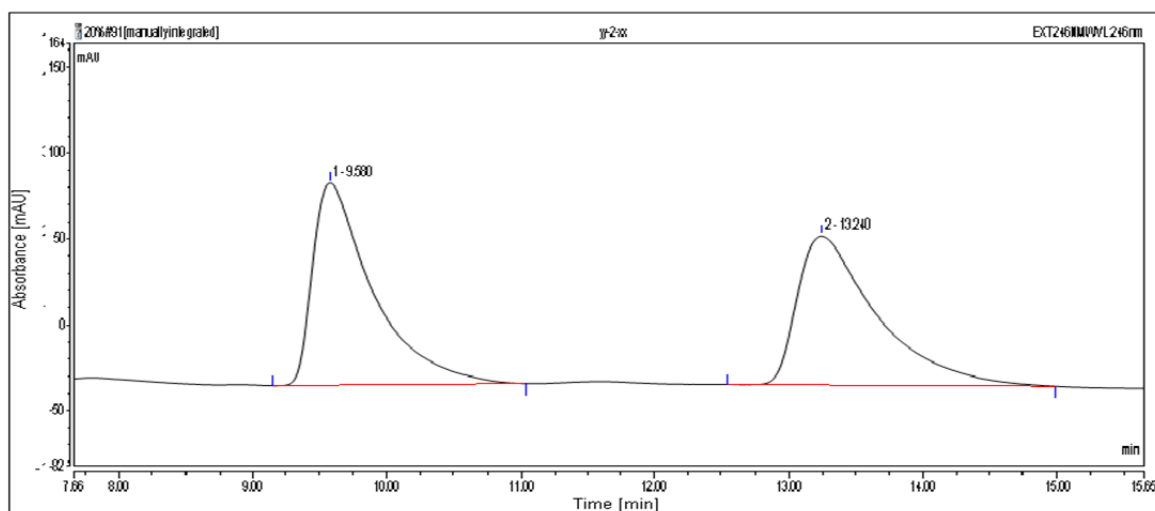

#### Integration Results

| No.           | Peak Name | Retention Time<br>min | Area<br>mAU*min | Relative Area<br>% | Amount<br>n.a. |
|---------------|-----------|-----------------------|-----------------|--------------------|----------------|
| 1             |           | 9.580                 | 61.578          | 50.62              | n.a.           |
| 2             |           | 13.240                | 60.078          | 49.38              | n.a.           |
| <b>Total:</b> |           |                       | <b>121.656</b>  | <b>100.00</b>      |                |

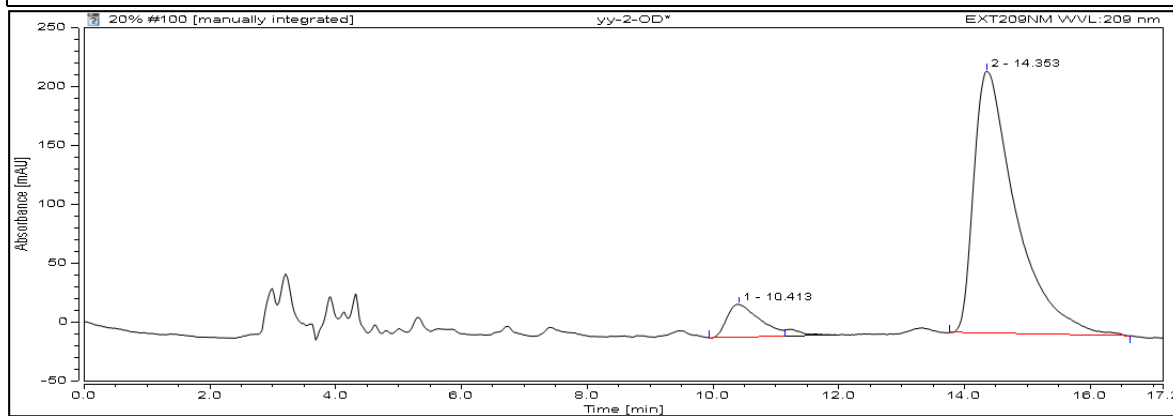

#### Integration Results

| No.           | Peak Name | Retention Time<br>min | Area<br>mAU*min | Relative Area<br>% | Amount<br>n.a. |
|---------------|-----------|-----------------------|-----------------|--------------------|----------------|
| 1             |           | 10.413                | 16.871          | 8.93               | n.a.           |
| 2             |           | 14.353                | 172.116         | 91.07              | n.a.           |
| <b>Total:</b> |           |                       | <b>188.987</b>  | <b>100.00</b>      |                |

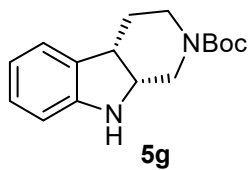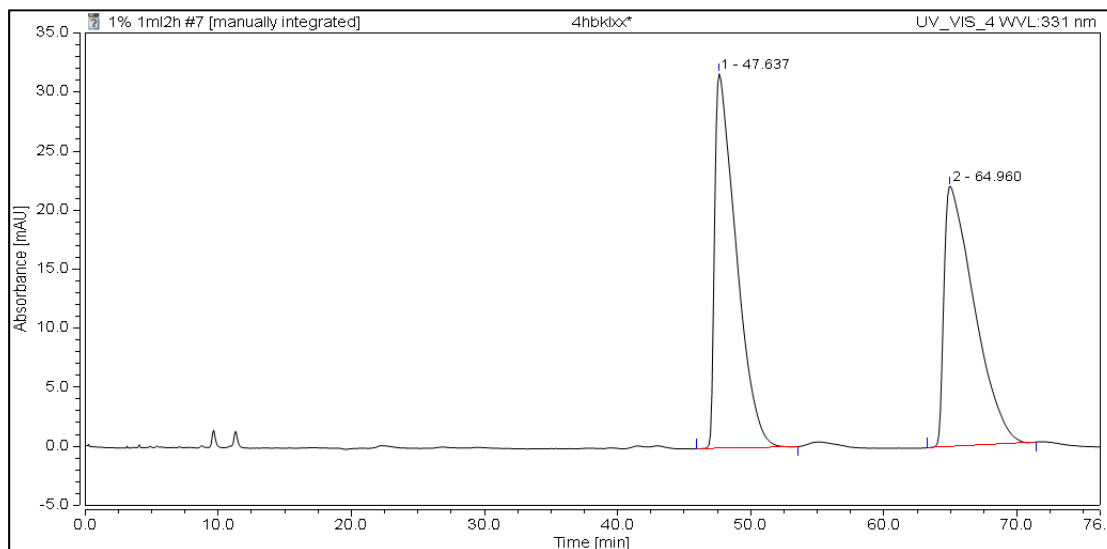

#### Integration Results

| No.           | Peak Name | Retention Time<br>min | Area<br>mAU*min | Relative Area<br>% | Amount<br>n.a. |
|---------------|-----------|-----------------------|-----------------|--------------------|----------------|
| 1             |           | 47.637                | 59.414          | 50.66              | n.a.           |
| 2             |           | 64.960                | 57.876          | 49.34              | n.a.           |
| <b>Total:</b> |           |                       | <b>117.290</b>  | <b>100.00</b>      |                |

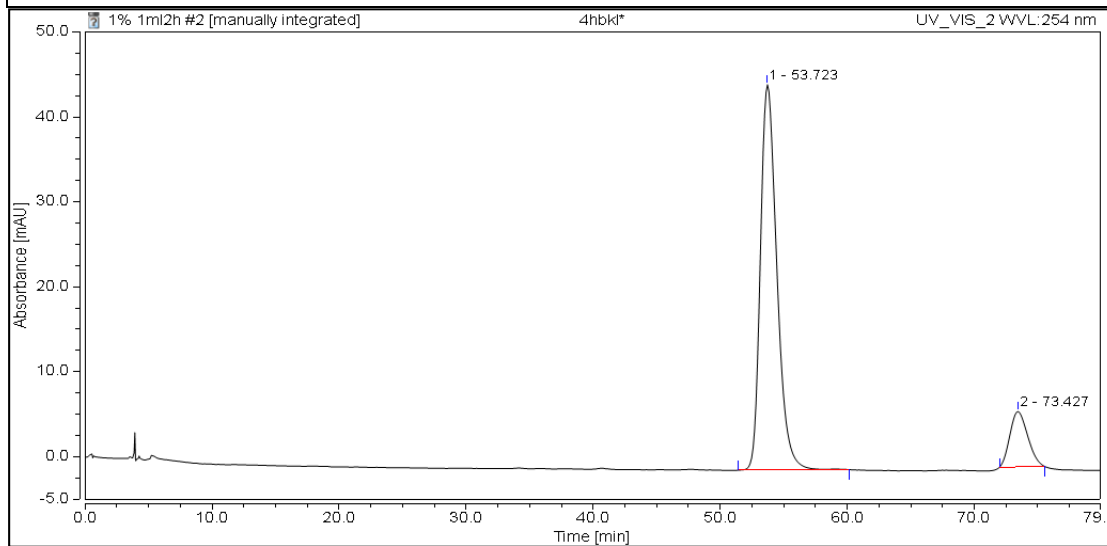

#### Integration Results

| No.           | Peak Name | Retention Time<br>min | Area<br>mAU*min | Relative Area<br>% | Amount<br>n.a. |
|---------------|-----------|-----------------------|-----------------|--------------------|----------------|
| 1             |           | 53.723                | 68.183          | 86.52              | n.a.           |
| 2             |           | 73.427                | 10.620          | 13.48              | n.a.           |
| <b>Total:</b> |           |                       | <b>78.803</b>   | <b>100.00</b>      |                |



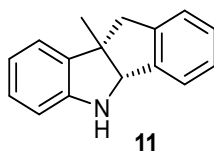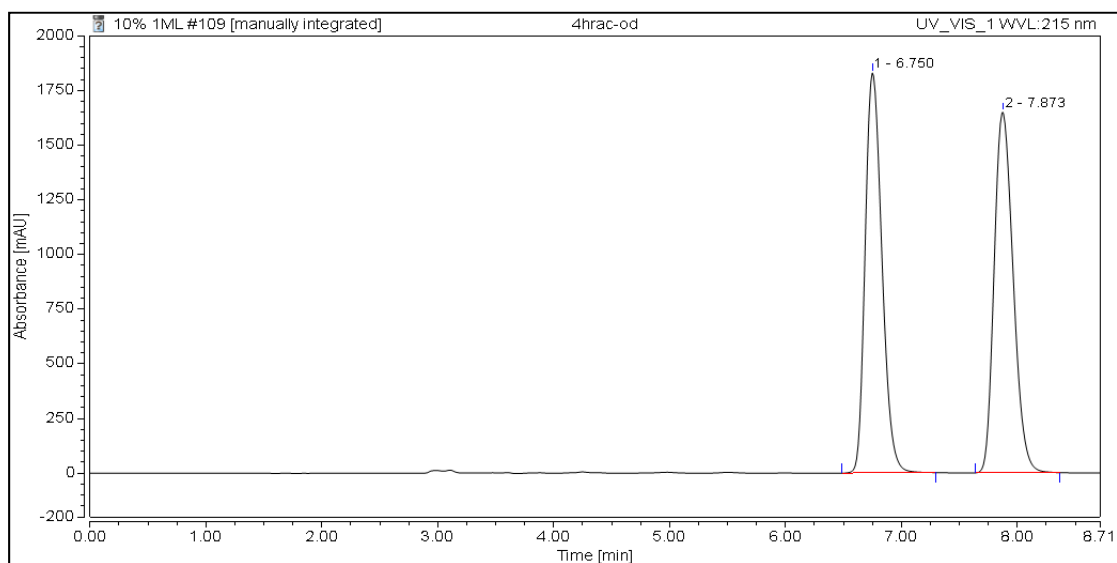

### Integration Results

| No.           | Peak Name | Retention Time<br>min | Area<br>mAU*min | Relative Area<br>% | Amount<br>n.a. |
|---------------|-----------|-----------------------|-----------------|--------------------|----------------|
| 1             |           | 6.750                 | 306.254         | 49.44              | n.a.           |
| 2             |           | 7.873                 | 313.208         | 50.56              | n.a.           |
| <b>Total:</b> |           |                       | <b>619.462</b>  | <b>100.00</b>      |                |

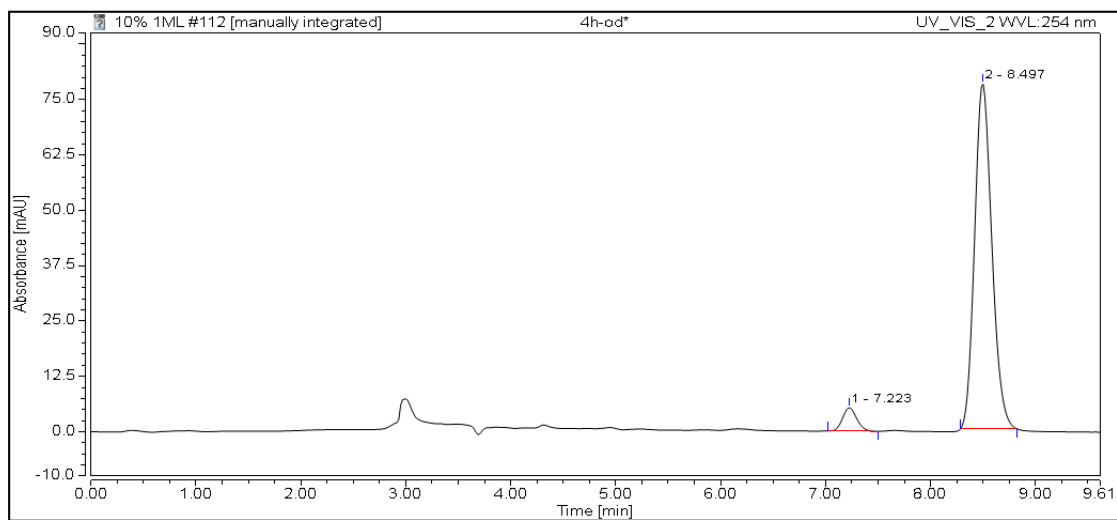

### Integration Results

| No.           | Peak Name | Retention Time<br>min | Area<br>mAU*min | Relative Area<br>% | Amount<br>n.a. |
|---------------|-----------|-----------------------|-----------------|--------------------|----------------|
| 1             |           | 7.223                 | 0.822           | 5.26               | n.a.           |
| 2             |           | 8.497                 | 14.805          | 94.74              | n.a.           |
| <b>Total:</b> |           |                       | <b>15.627</b>   | <b>100.00</b>      |                |

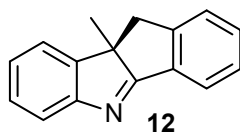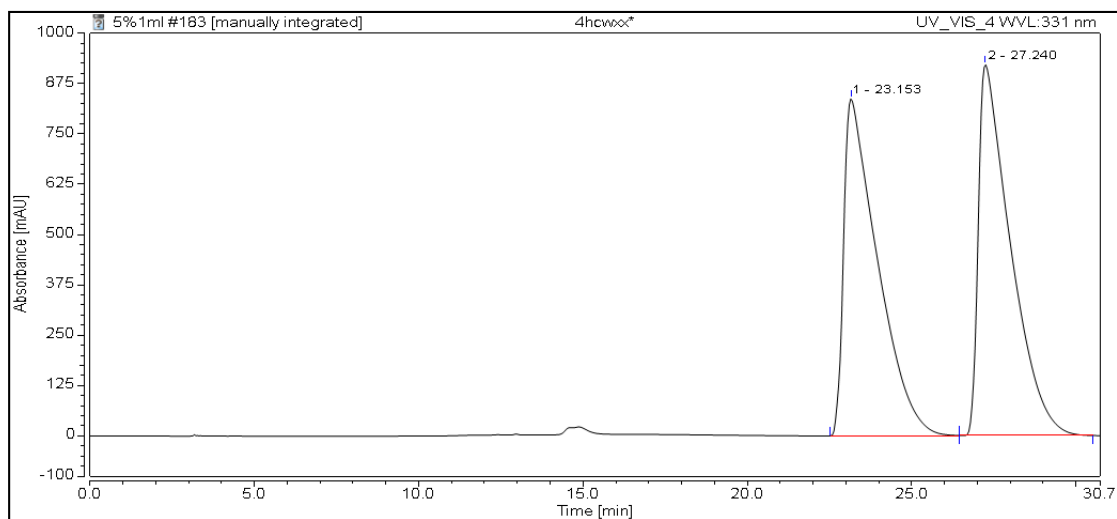

### Integration Results

| No.           | Peak Name | Retention Time<br>min | Area<br>mAU*min | Relative Area<br>% | Amount<br>n.a. |
|---------------|-----------|-----------------------|-----------------|--------------------|----------------|
| 1             |           | 23.153                | 997.821         | 48.97              | n.a.           |
| 2             |           | 27.240                | 1039.921        | 51.03              | n.a.           |
| <b>Total:</b> |           |                       | <b>2037.742</b> | <b>100.00</b>      |                |

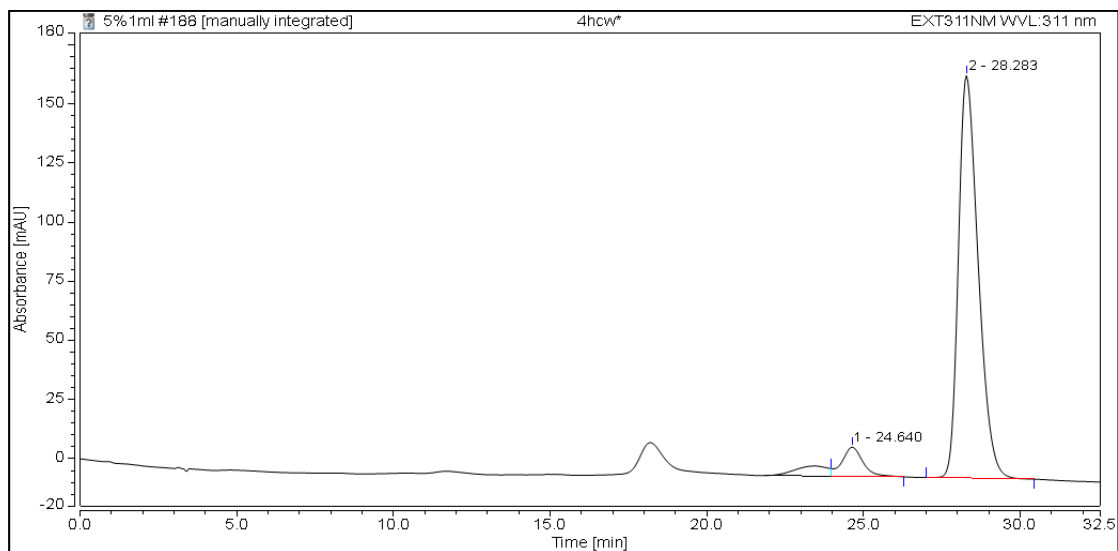

### Integration Results

| No.           | Peak Name | Retention Time<br>min | Area<br>mAU*min | Relative Area<br>% | Amount<br>n.a. |
|---------------|-----------|-----------------------|-----------------|--------------------|----------------|
| 1             |           | 24.640                | 9.589           | 7.15               | n.a.           |
| 2             |           | 28.283                | 124.486         | 92.85              | n.a.           |
| <b>Total:</b> |           |                       | <b>134.074</b>  | <b>100.00</b>      |                |
